# Supplementary material
Source: MDPI journal article supplement (https://www.mdpi.com/1424-8247/15/4/417)

# Investigation of Direct and Retro Chromone-2-carboxamides based Analogs of *Pseudomonas aeruginosa* Quorum Sensing Signal as New Anti-biofilm Agents

Jeanne Trognon <sup>1</sup>, Gonzalo Vera <sup>1</sup>, Maya Rima <sup>1</sup>, Jean-Luc Stigliani <sup>2</sup>, Laurent Amielet <sup>1</sup>, Salomé El Hage <sup>1</sup>, Barbora Lajoie <sup>1</sup>, Christine Roques <sup>1</sup> and Fatima El Garah <sup>1,\*</sup>

## Supplementary Material

Table S1: Structural properties and Lipinski's parameters of chromone carboxamides

| Code     | MW    | LogS | LogP | pKa   | non-H atoms | VdW surface area (Å <sup>2</sup> ) |
|----------|-------|------|------|-------|-------------|------------------------------------|
| Series 1 |       |      |      |       |             |                                    |
| 3a       | 265.0 | -4.6 | 2.73 | 12.11 | 20          | 338.8                              |
| 3b       | 279.0 | -5.1 | 3.24 | 12.19 | 21          | 370.1                              |
| 3c       | 293.0 | -5.6 | 3.69 | 12.2  | 22          | 400.4                              |
| 3d       | 307.0 | -6.1 | 4.13 | 12.19 | 23          | 431.1                              |
| 3e       | 283.0 | -4.9 | 2.87 | 12.18 | 21          | 345.8                              |
| 3f       | 299.0 | -5.3 | 3.34 | 12.09 | 21          | 355.2                              |
| 3g       | 344.2 | -5.6 | 3.50 | 12.09 | 21          | 359.6                              |
| 3h       | 283.0 | -4.9 | 2.87 | 10.9  | 21          | 345.6                              |
| 3i       | 299.0 | -5.3 | 3.34 | 11.41 | 21          | 354.8                              |
| 3j       | 344.2 | -5.6 | 3.50 | 11.55 | 21          | 358.7                              |
| 3k       | 317.7 | -5.6 | 3.48 | 11.51 | 22          | 361.8                              |
| 3m       | 310.3 | -5.3 | 2.67 | 11.58 | 23          | 376.9                              |
| 3o       | 355.3 | -5.9 | 2.61 | 11.32 | 26          | 413.3                              |
| 3p       | 295.3 | -4.6 | 2.57 | 12.24 | 22          | 386.4                              |
| 3q       | 295.3 | -4.6 | 2.57 | 11.27 | 22          | 385.5                              |
| 3r       | 311.4 | -5.3 | 3.36 | 11.67 | 22          | 392.4                              |
| 3u       | 350.3 | -4.9 | 2.62 | 15.21 | 26          | 472.3                              |
| 3v       | 267.2 | -3.9 | 1.49 | 0.69  | 20          | 324.1                              |
| 3x       | 271.3 | -4.4 | 2.51 | 13.97 | 20          | 386.6                              |
| 3y       | 323.4 | -5.6 | 2.81 | 13.56 | 24          | 447.0                              |
| 3'a      | 293.0 | -5.6 | 3.69 | 12.11 | 22          | 400.9                              |
| 3'b      | 366.0 | -4.2 | 2.43 | 9.01  | 21          | 350.2                              |
| 3'c      | 281.0 | -4.1 | 3.08 | 8.06  | 27          | 530.1                              |
| 3'e      | 386.2 | -4.4 | 2.1  | 14.03 | 28          | 579.2                              |
| 3'g      | 330.0 | -1.8 | 2.44 | 9.32  | 24          | 537.6                              |
| 3'i      | 384.0 | -3.4 | 0.31 | 5.03  | 28          | 532.9                              |
| Series 2 |       |      |      |       |             |                                    |
| 6a       | 265.3 | -4.9 | 2.84 | 12.85 | 20          | 338.1                              |
| 6b       | 279.3 | -5.4 | 3.35 | 13.08 | 21          | 370.1                              |
| 6c       | 293.3 | -5.9 | 3.80 | 13.06 | 22          | 400.9                              |
| 6d       | 307.3 | -6.4 | 4.24 | 13.05 | 23          | 433.2                              |
| 6e       | 283.3 | -5.2 | 2.98 | 12.62 | 21          | 345.2                              |
| 6f       | 300.4 | -5.6 | 3.45 | 12.60 | 21          | 354.3                              |
| 6g       | 344.2 | -5.9 | 3.61 | 12.64 | 21          | 358.6                              |
| 6h       | 283.2 | -5.2 | 2.98 | 9.84  | 21          | 343.8                              |
| 6i       | 300.4 | -5.6 | 3.45 | 10.09 | 21          | 352.9                              |
| 6j       | 344.2 | -5.9 | 3.61 | 10.07 | 21          | 356.3                              |
| 6k       | 317.7 | -5.9 | 3.59 | 9.93  | 22          | 360.0                              |

|    |       |      |      |       |    |       |
|----|-------|------|------|-------|----|-------|
| 6l | 317.7 | -5.9 | 3.59 | 12.28 | 22 | 360.5 |
| 6m | 310.3 | -5.6 | 2.78 | 10.16 | 23 | 376.1 |
| 6n | 357.3 | -5.0 | 2.72 | 8.79  | 26 | 419.0 |
| 6o | 357.3 | -5.0 | 2.72 | 9.38  | 26 | 421.0 |
| 6p | 295.3 | -4.9 | 2.68 | 12.93 | 22 | 386.3 |
| 6q | 296.3 | -4.9 | 2.68 | 10.61 | 22 | 385.5 |
| 6r | 312.4 | -5.6 | 3.47 | 10.9  | 22 | 392.7 |
| 6s | 327.3 | -4.9 | 2.53 | 12.57 | 24 | 434.9 |
| 6t | 325.3 | -4.9 | 2.53 | 10.65 | 24 | 435.1 |
| 6u | 350.4 | -5.2 | 2.73 | 13.53 | 26 | 473.8 |
| 6v | 267.2 | -3.2 | 1.46 | 12.07 | 20 | 323.6 |
| 6w | 231.3 | -3.8 | 2.13 | 12.43 | 17 | 326.4 |
| 6x | 271.3 | -5.2 | 3.10 | 12.40 | 20 | 385.5 |
| 6y | 323.4 | -6.3 | 3.59 | 12.36 | 24 | 447.3 |

**Figure S1.** Anti-biofilm activity against *P. aeruginosa* PAO1 of direct chromone carboxamides (**3a-y** and **3'a-i**) at 50  $\mu$ M, expressed as inhibition % (GraphPad 5.0)

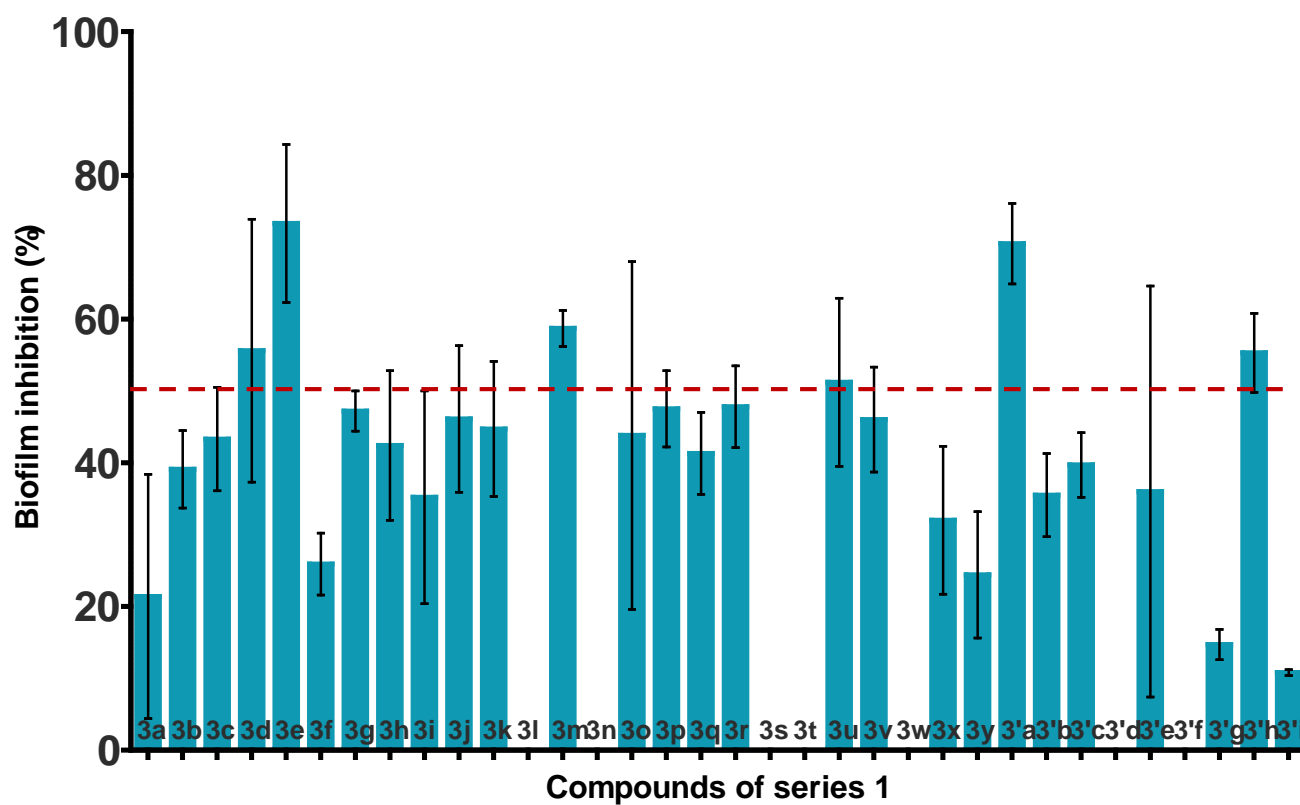

**Figures S2 to S123:**  $^1\text{H}$  (300 MHz,  $\text{DMSO-d}_6$ ) and  $^{13}\text{C}$  NMR (75 MHz,  $\text{DMSO-d}_6$ ) spectra of final compounds

4-Oxo-4H-chromene-2-carbonyl chloride (2)

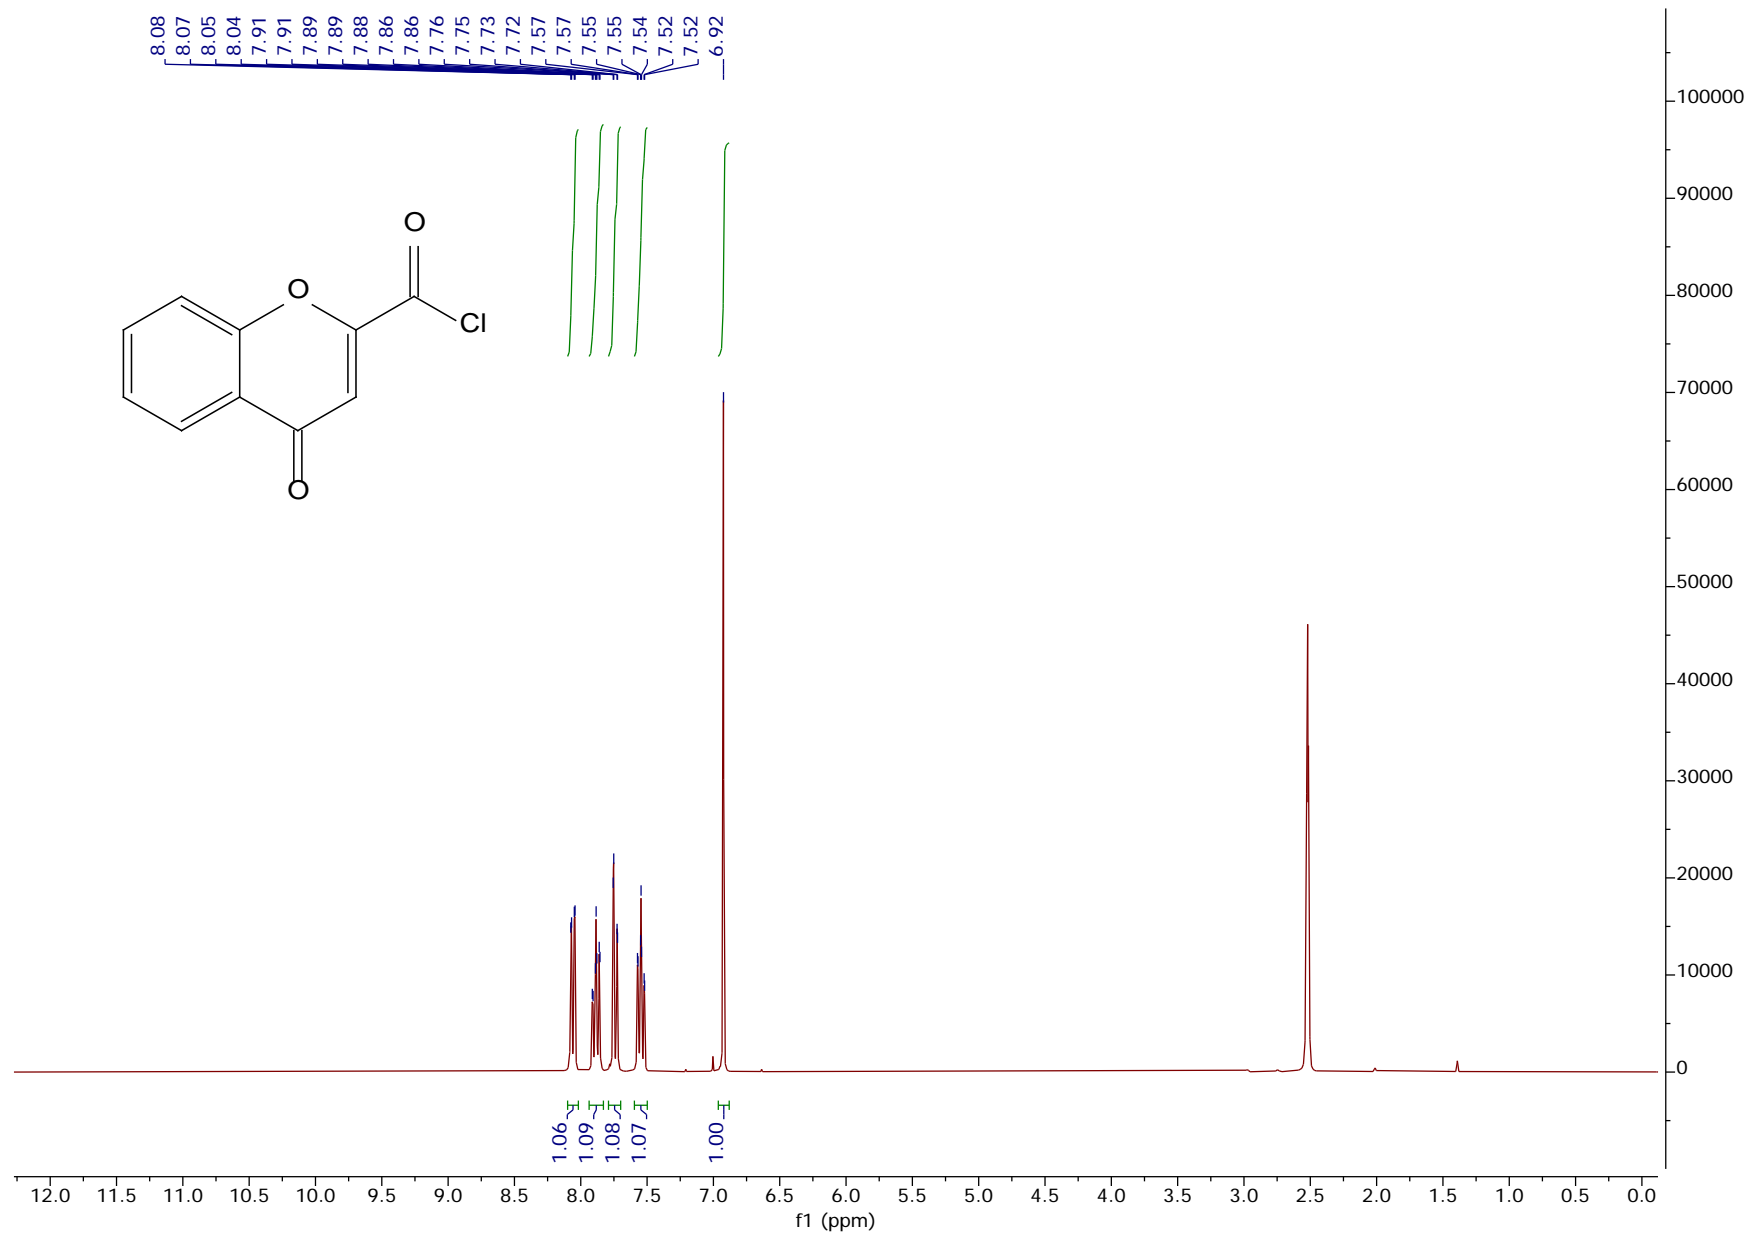

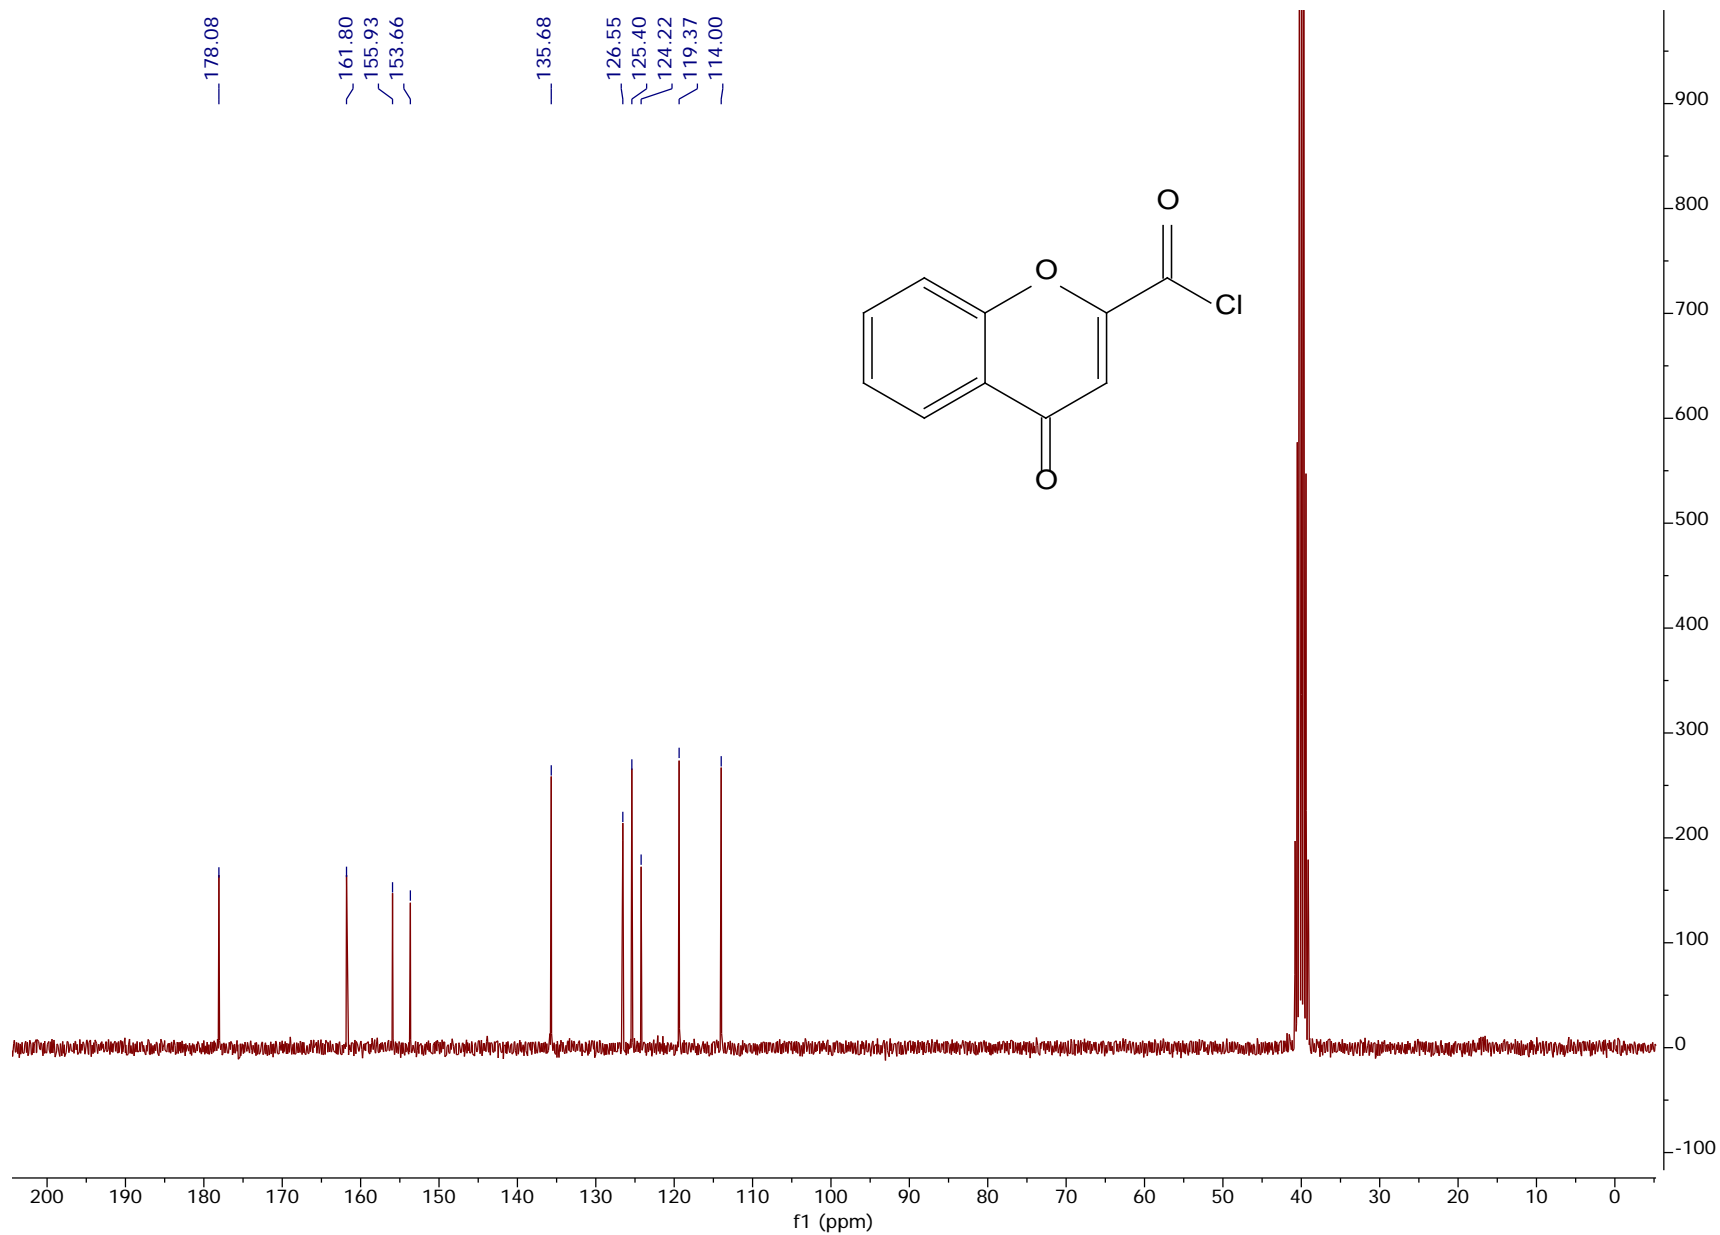

2-Amino-4H-chromen-4-one (4)



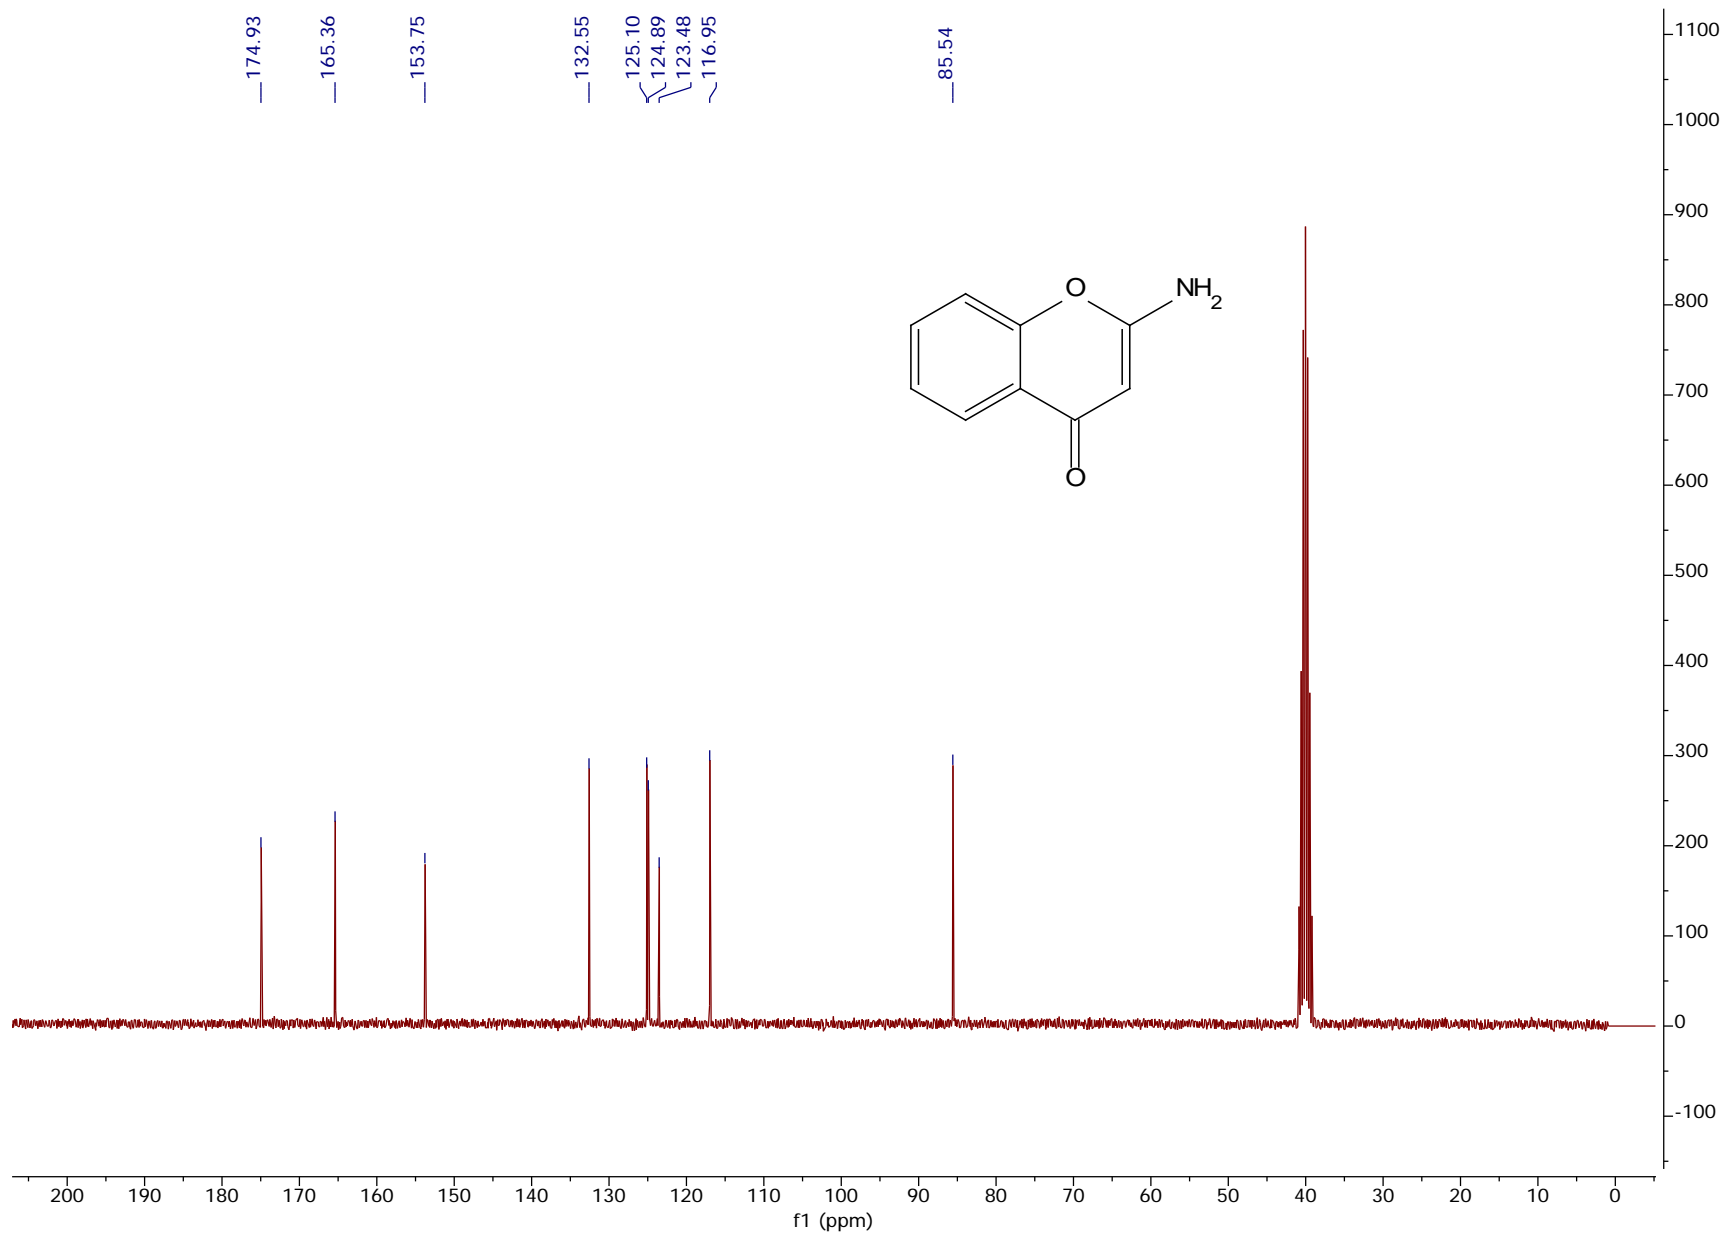

4-Oxo-N-phenyl-4H-chromene-2-carboxamide (3a)

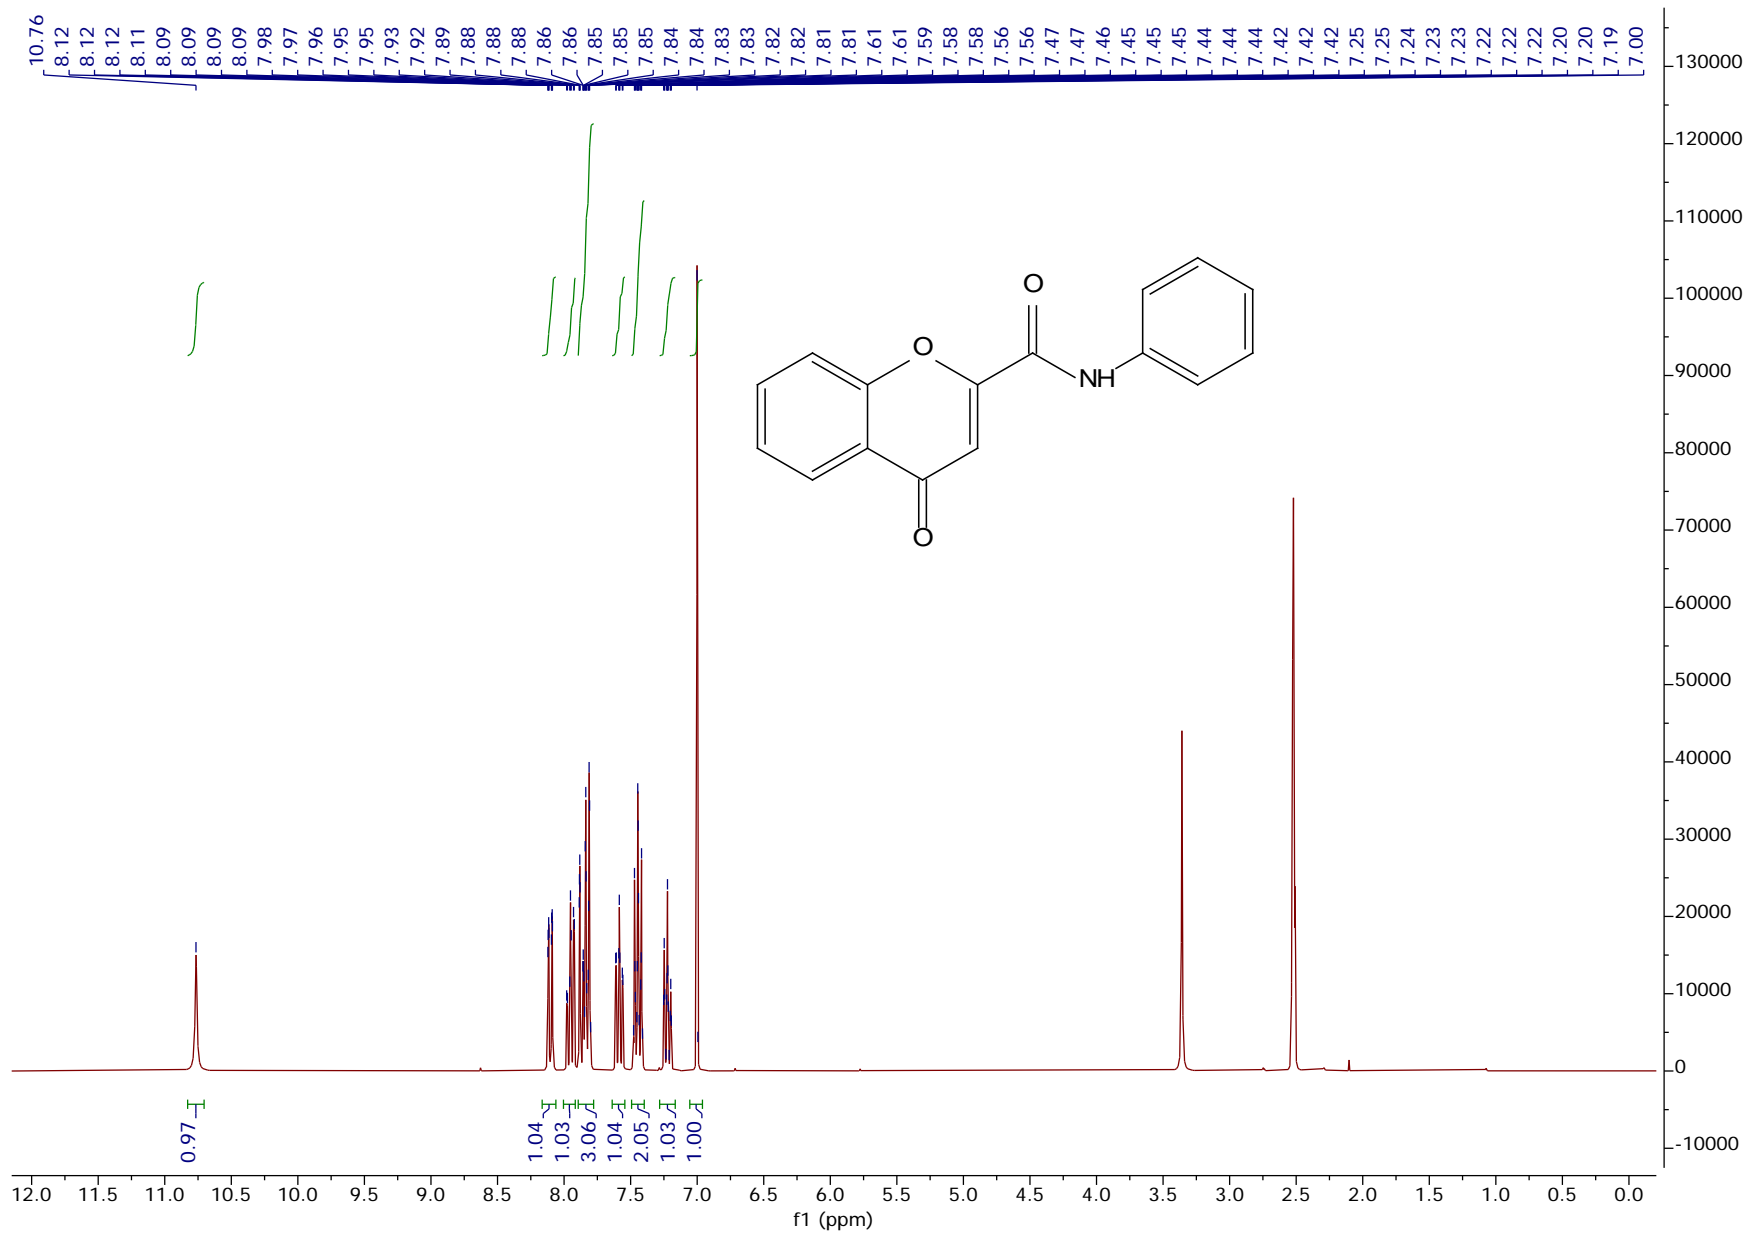

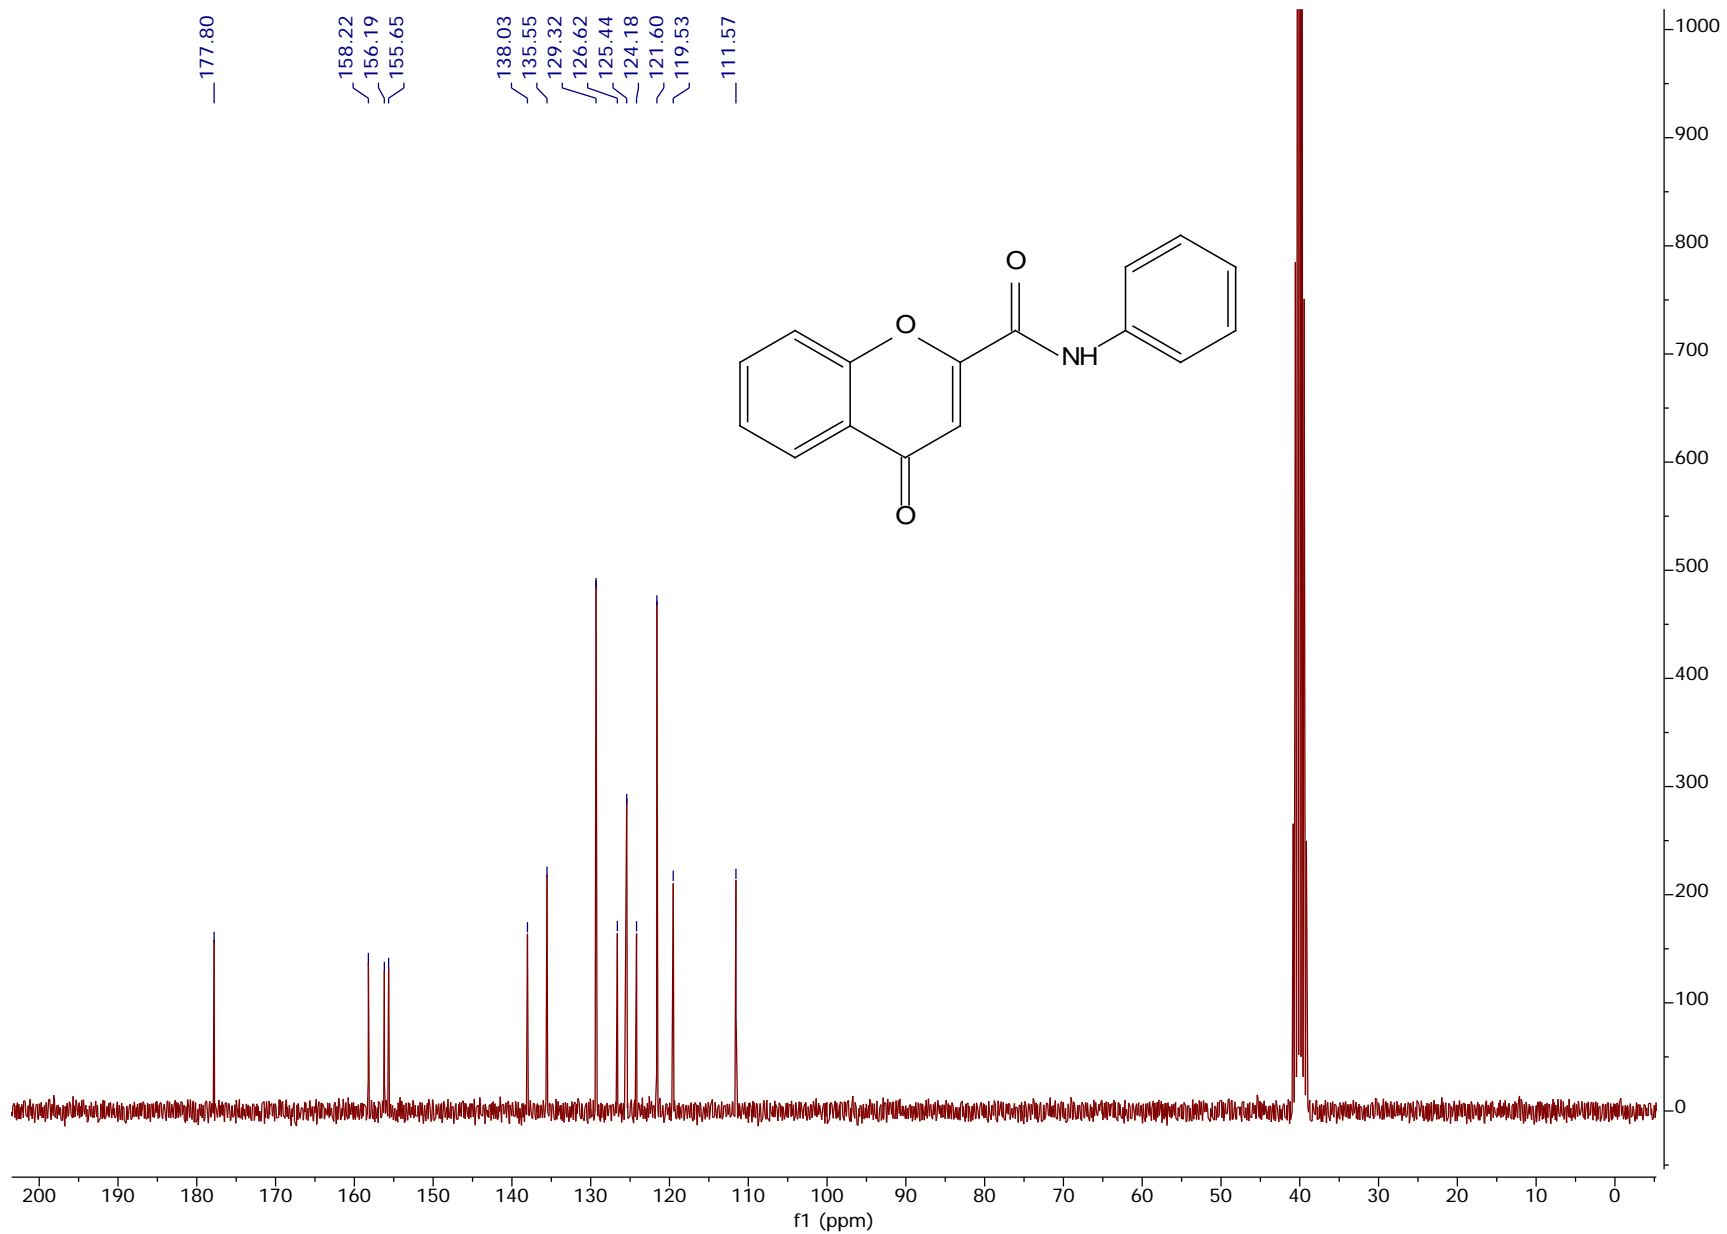



4-Oxo-N-(p-tolyl)-4H-chromene-2-carboxamide (3b)

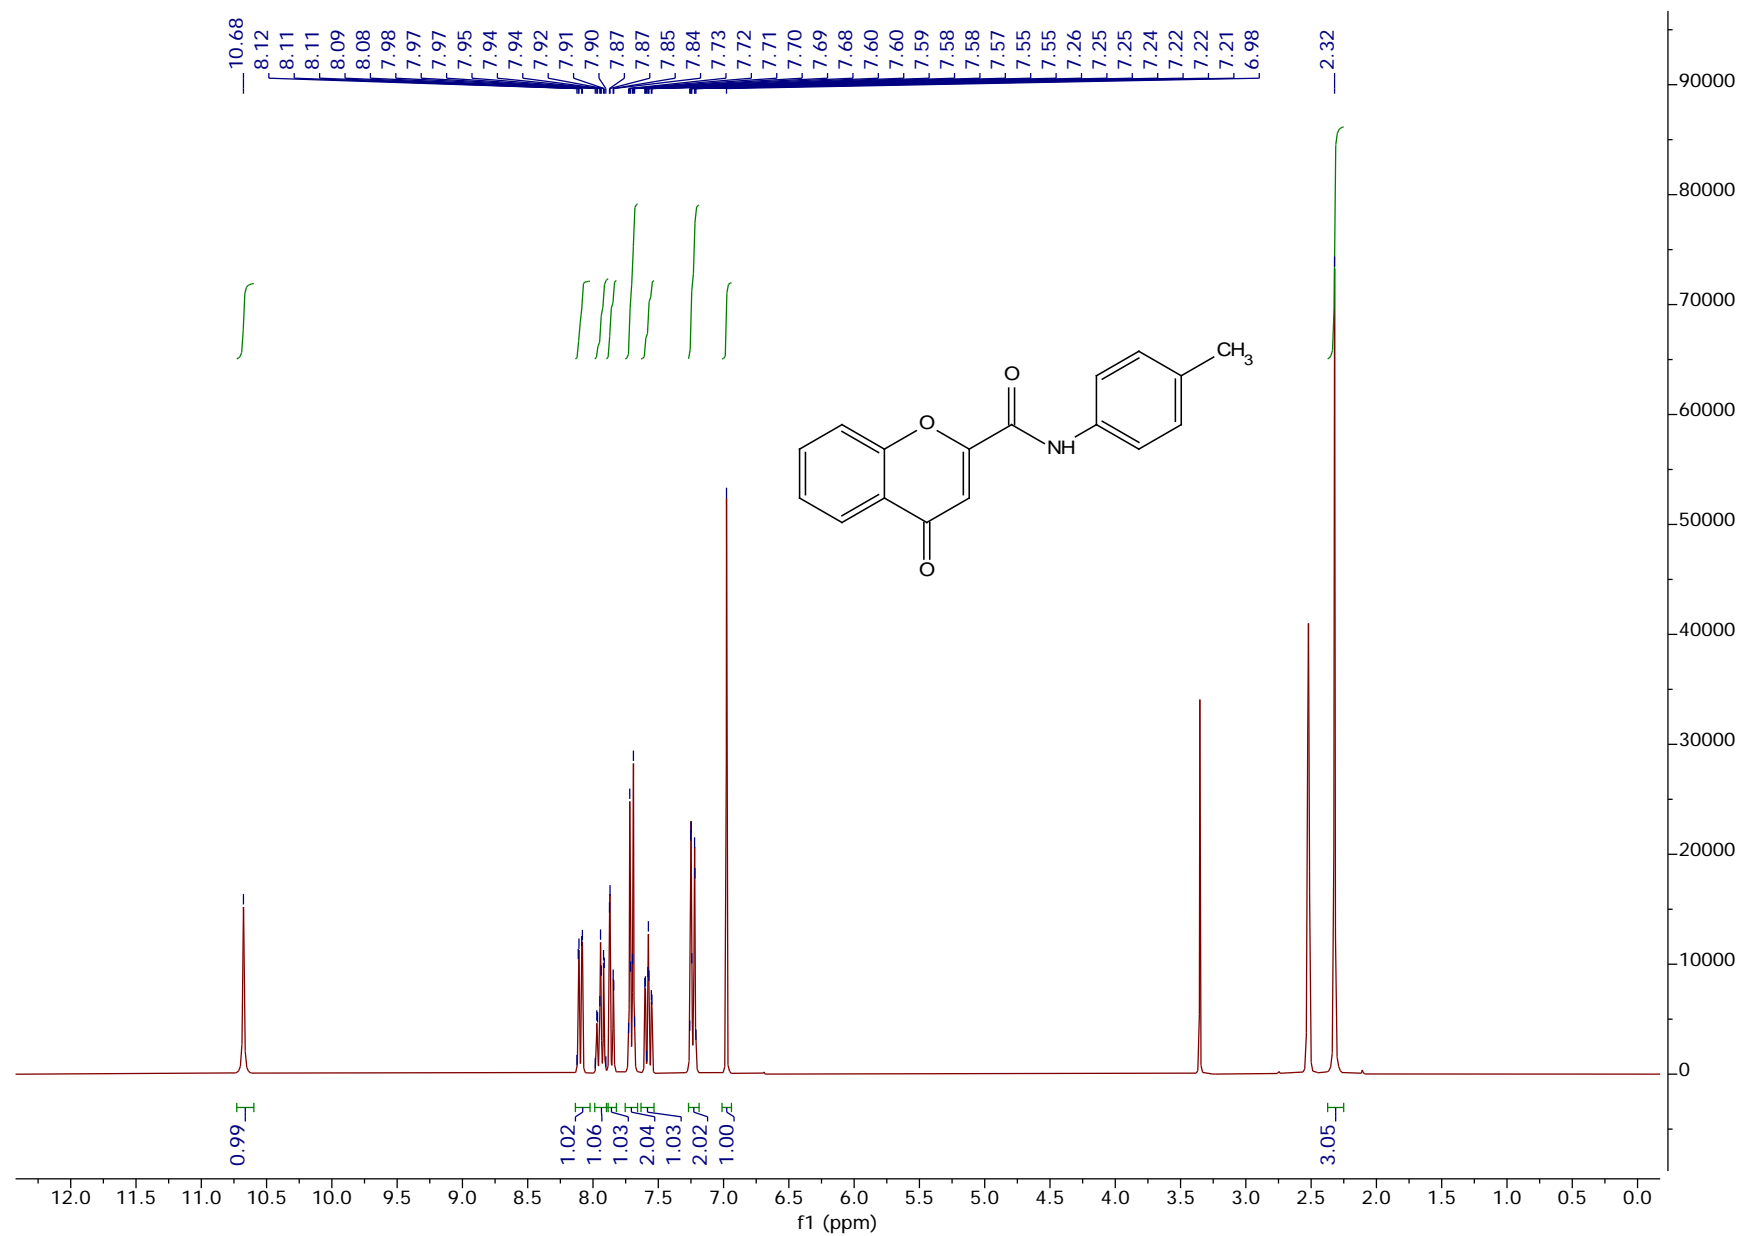

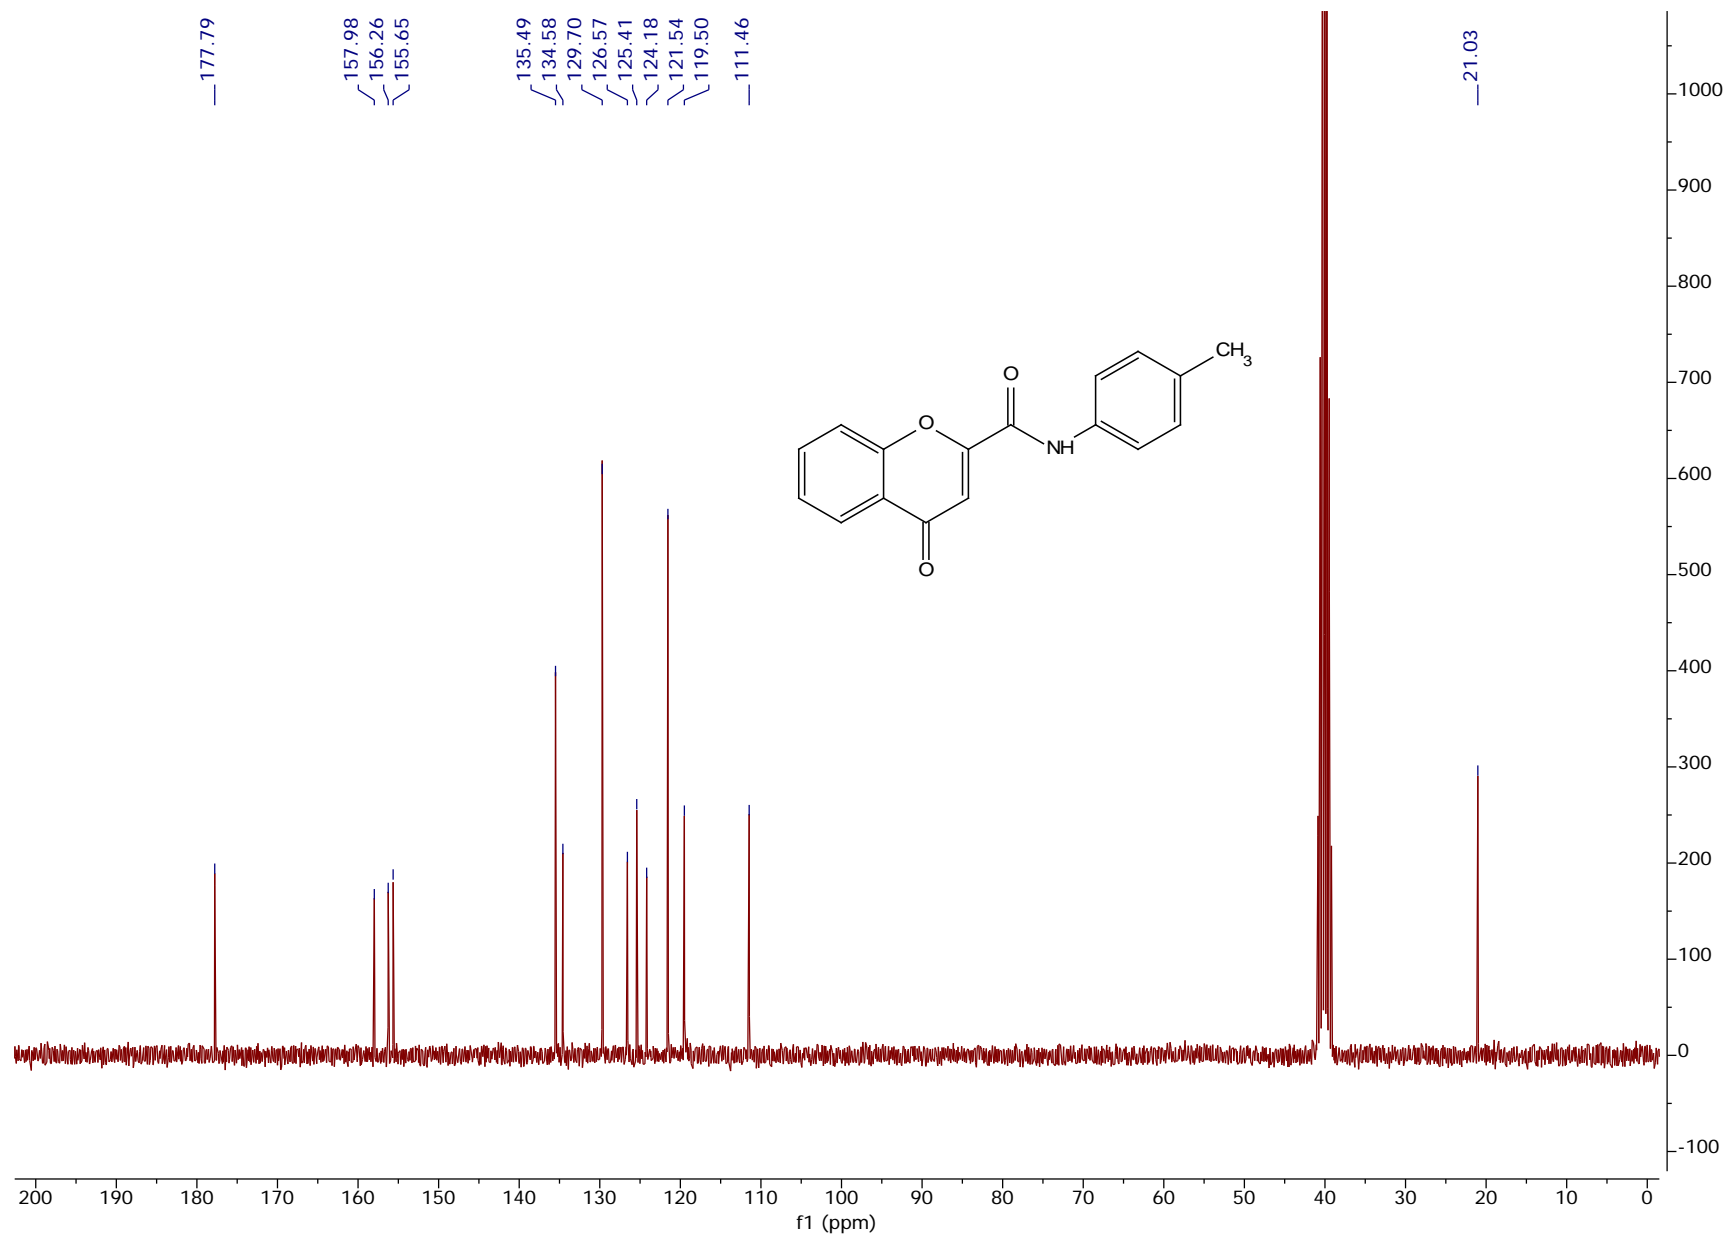

***N*-(4-Ethylphenyl)-4-oxo-4*H*-chromene-2-carboxamide (3c)**

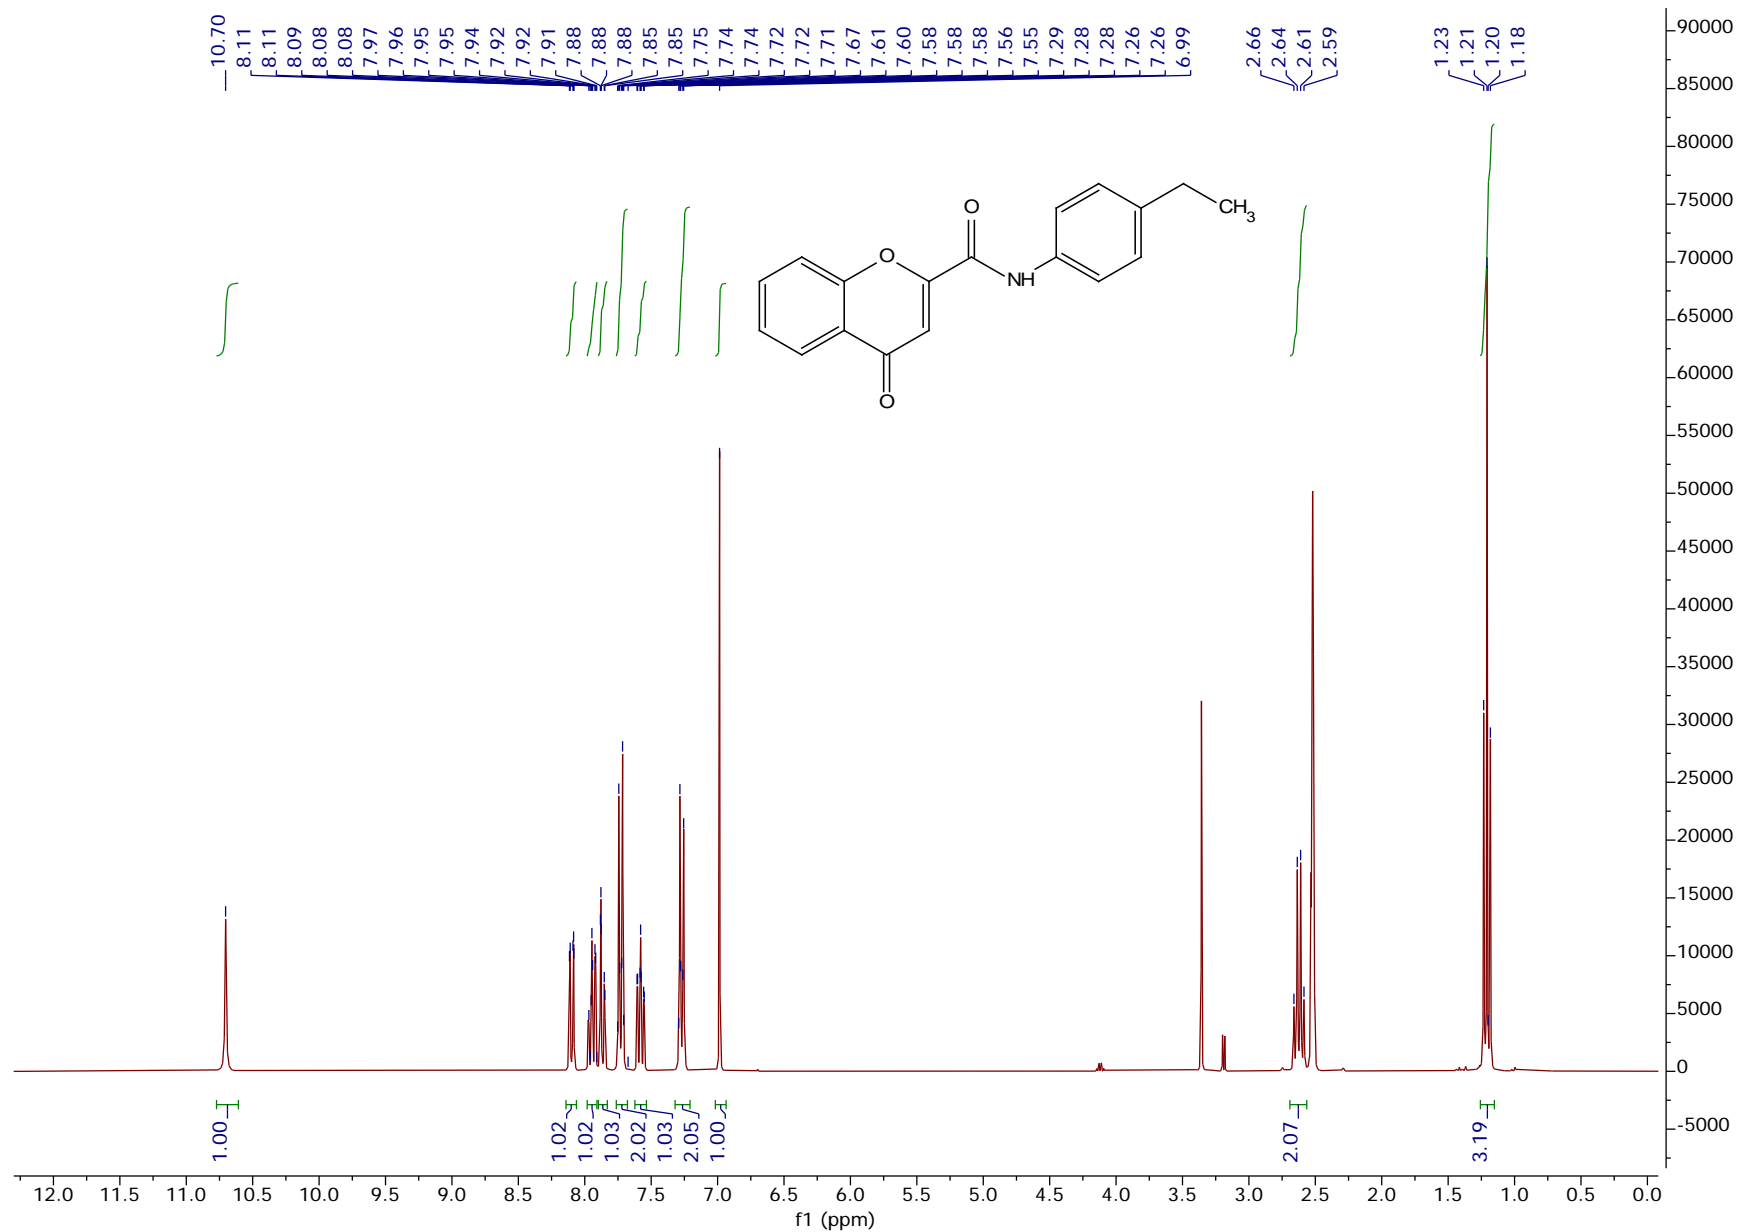

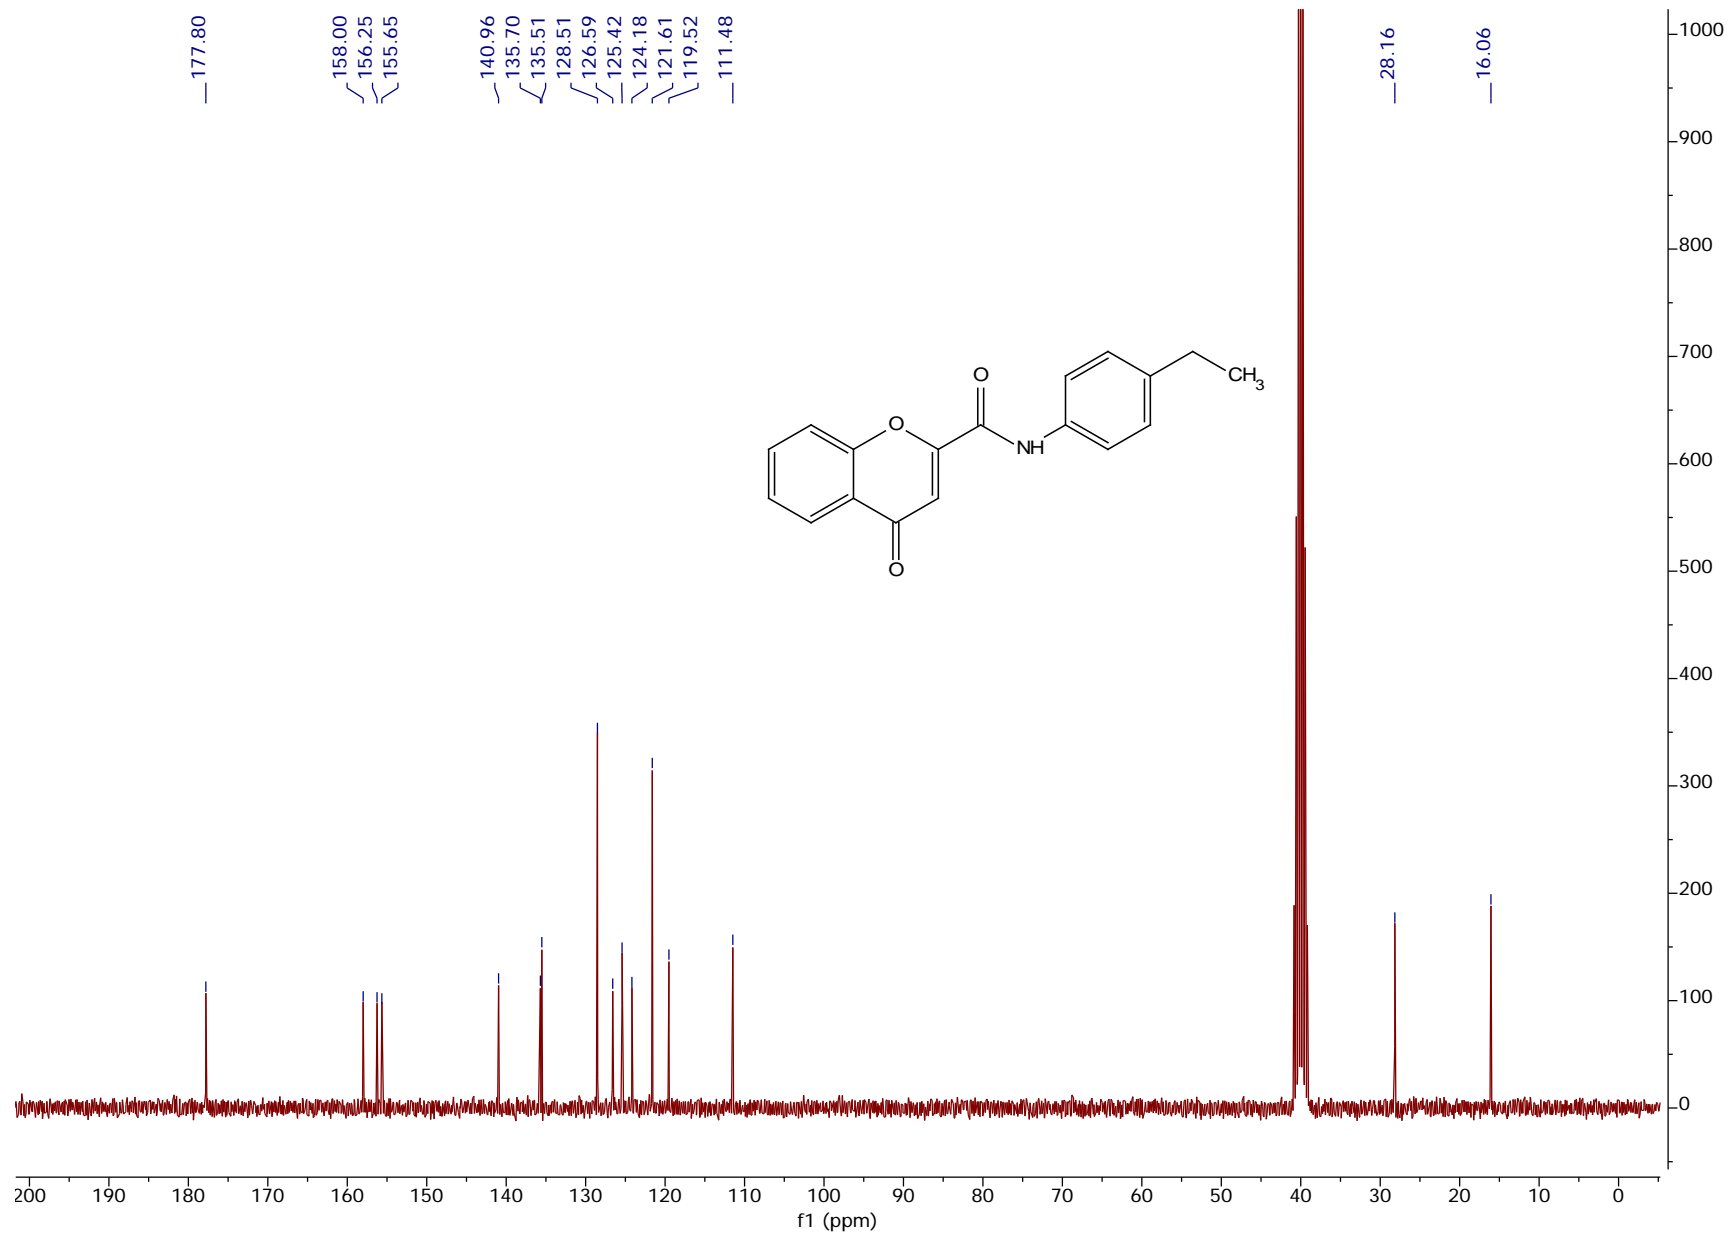

4-Oxo-N-(4-propylphenyl)-4H-chromene-2-carboxamide (3d)

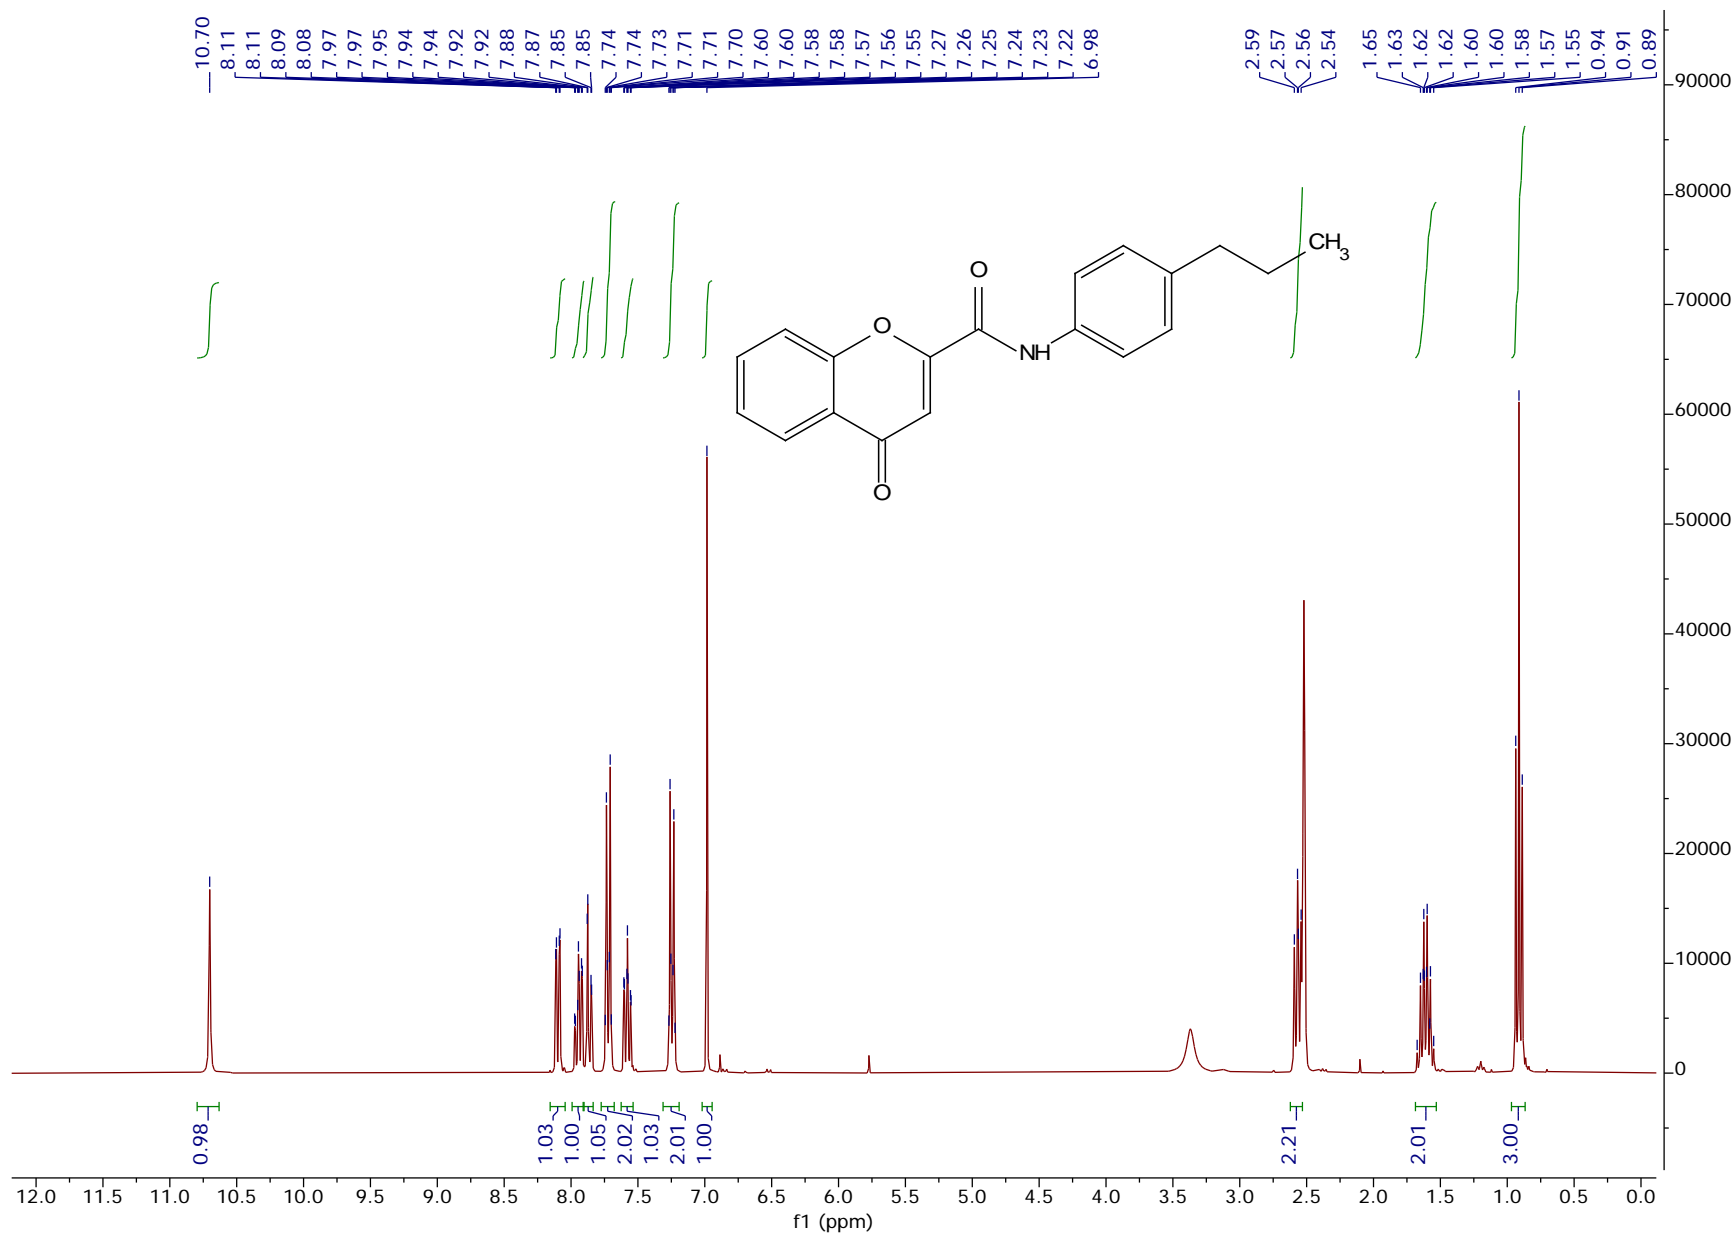

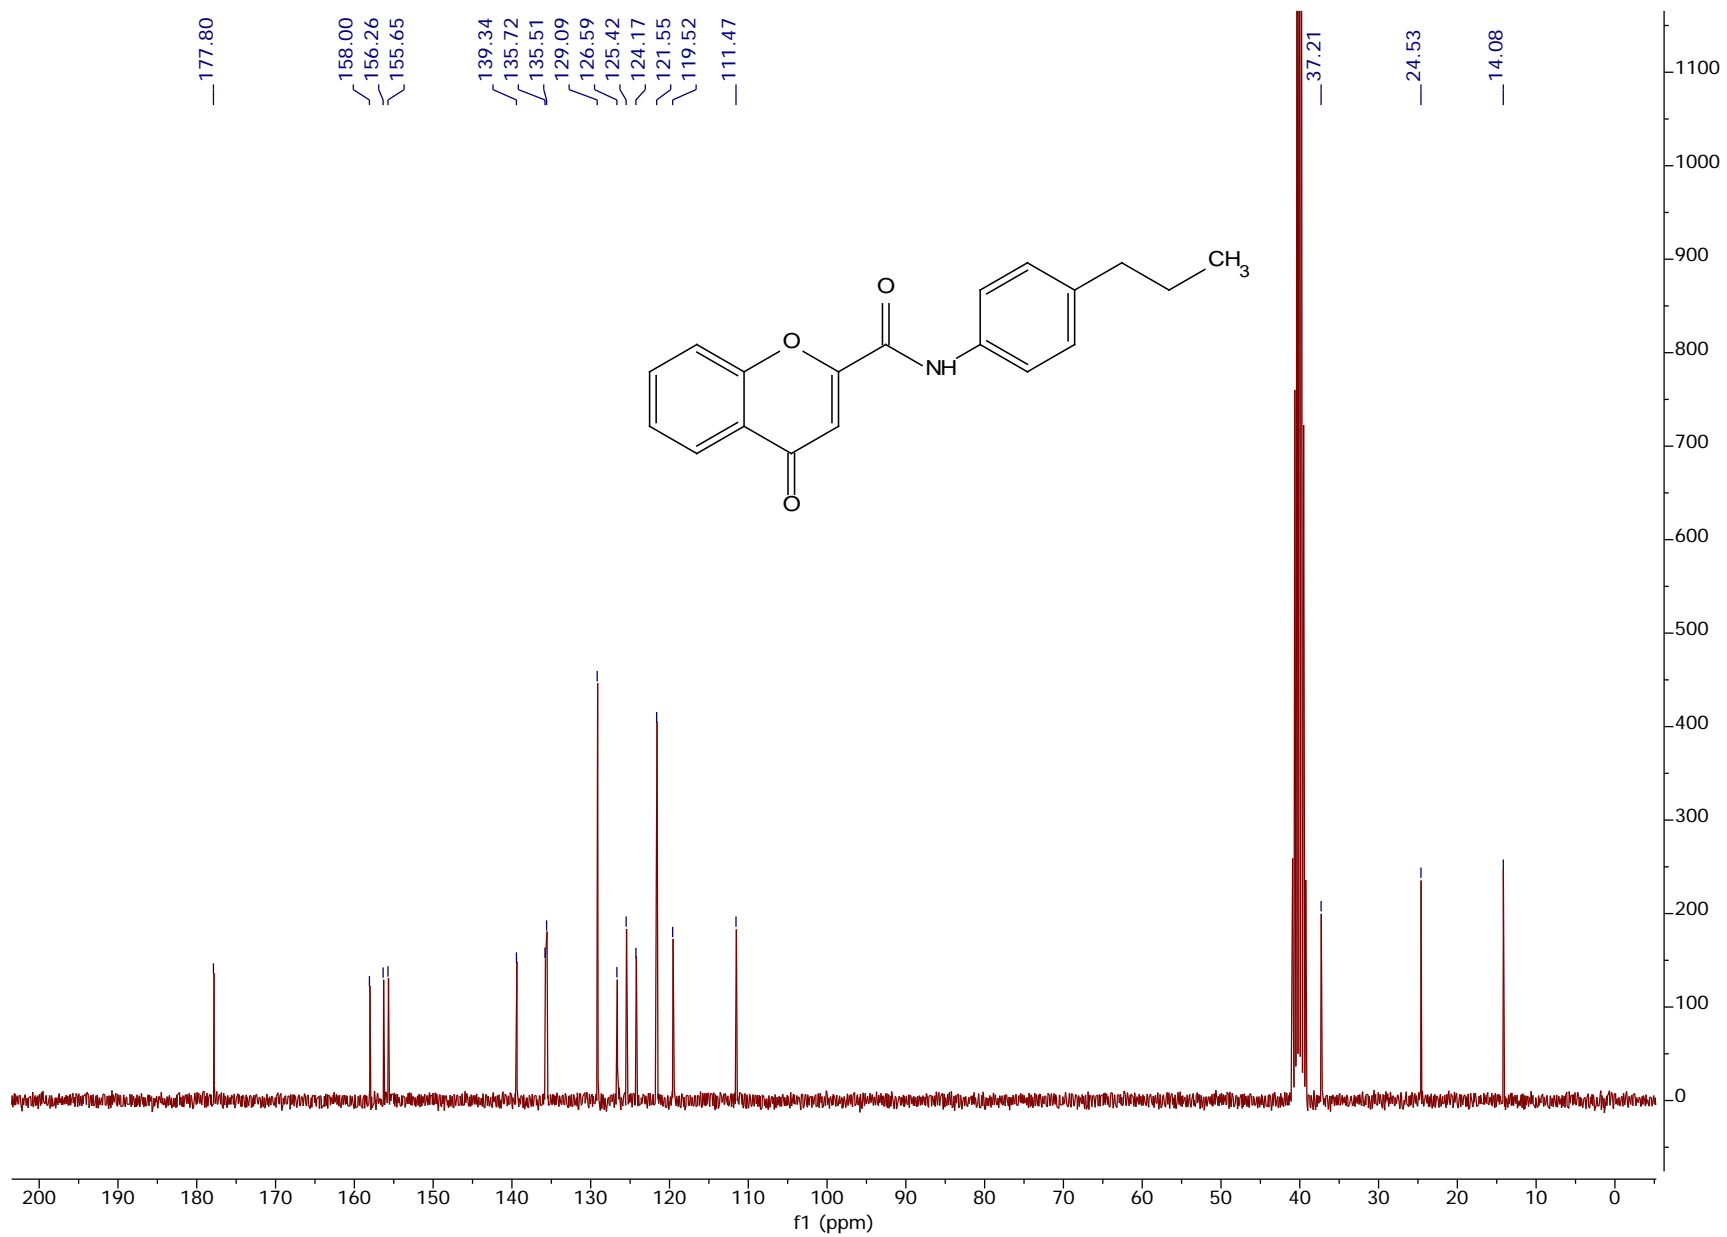

***N*-(4-Fluorophenyl)-4-oxo-4*H*-chromene-2-carboxamide (3e)**

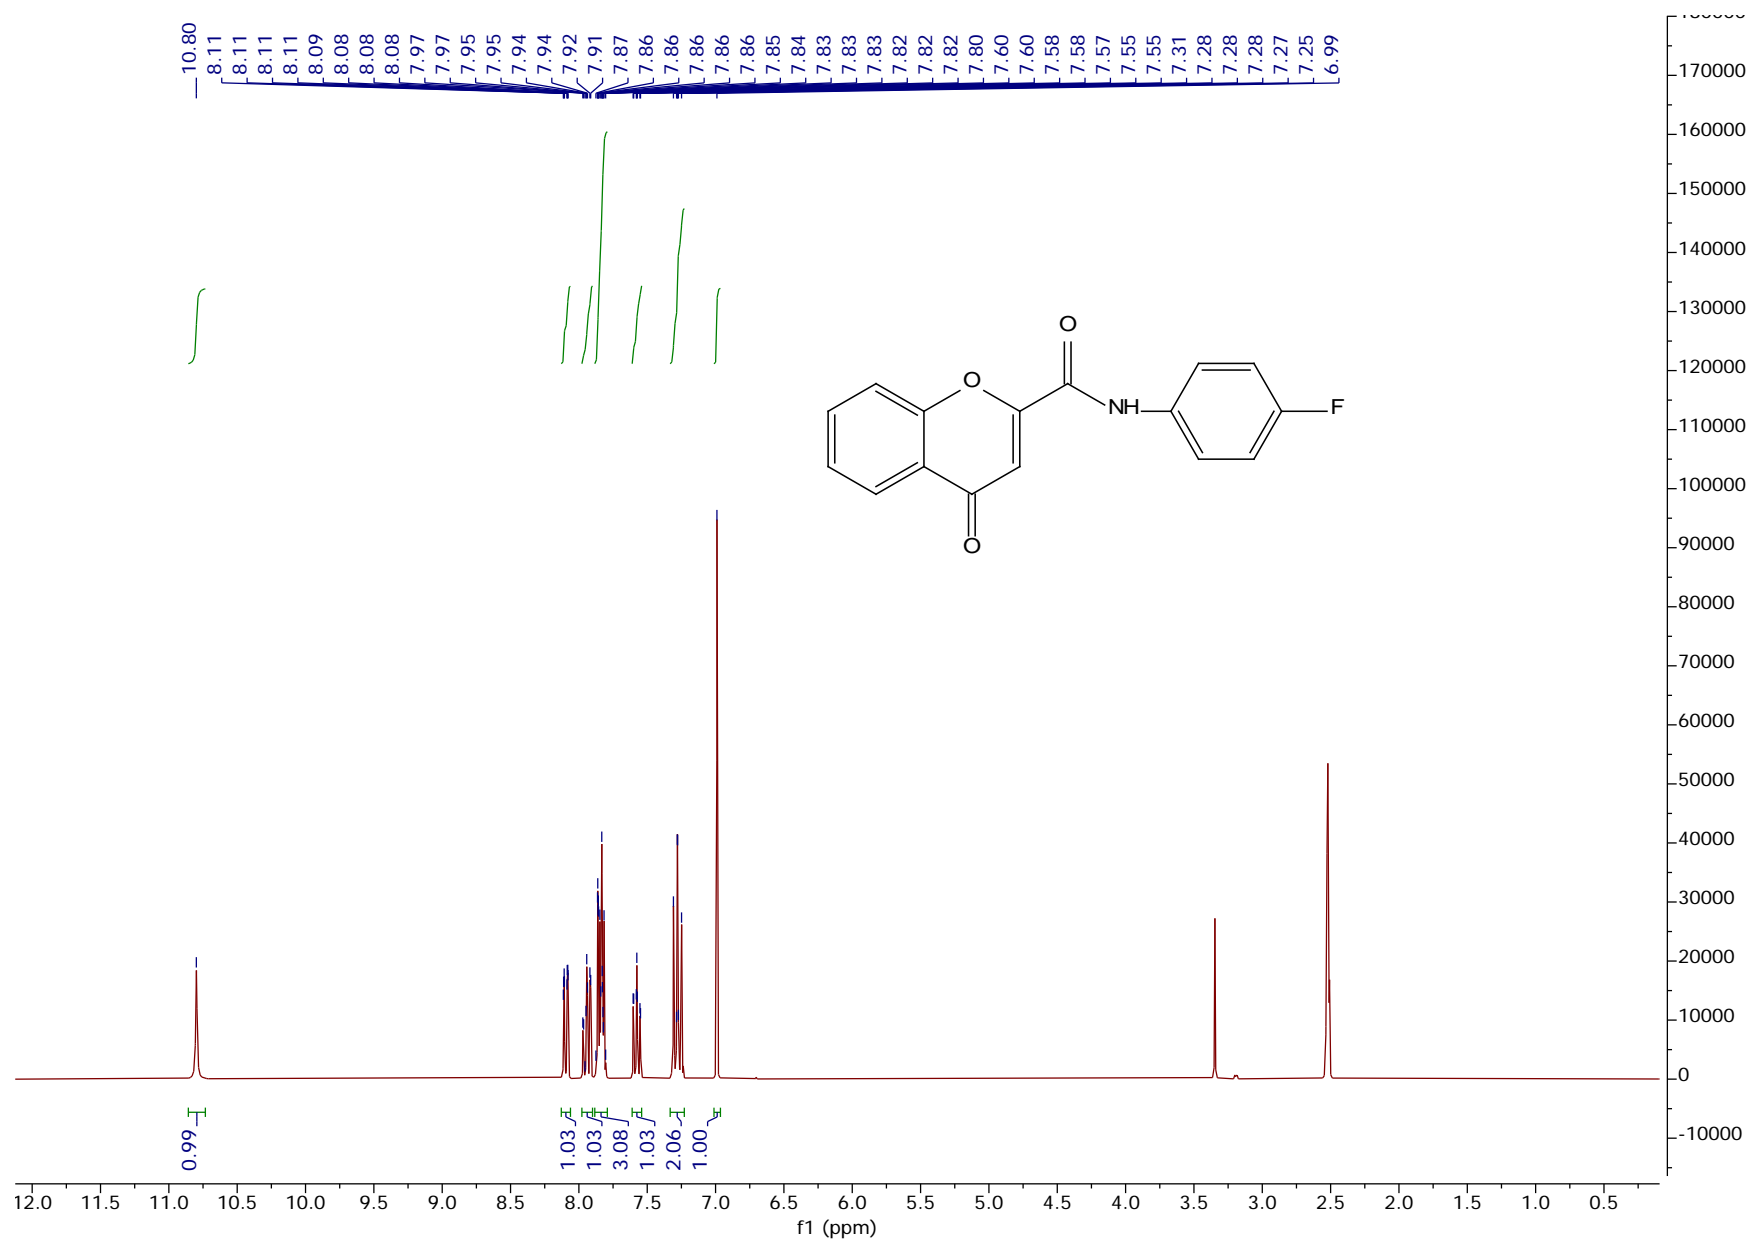

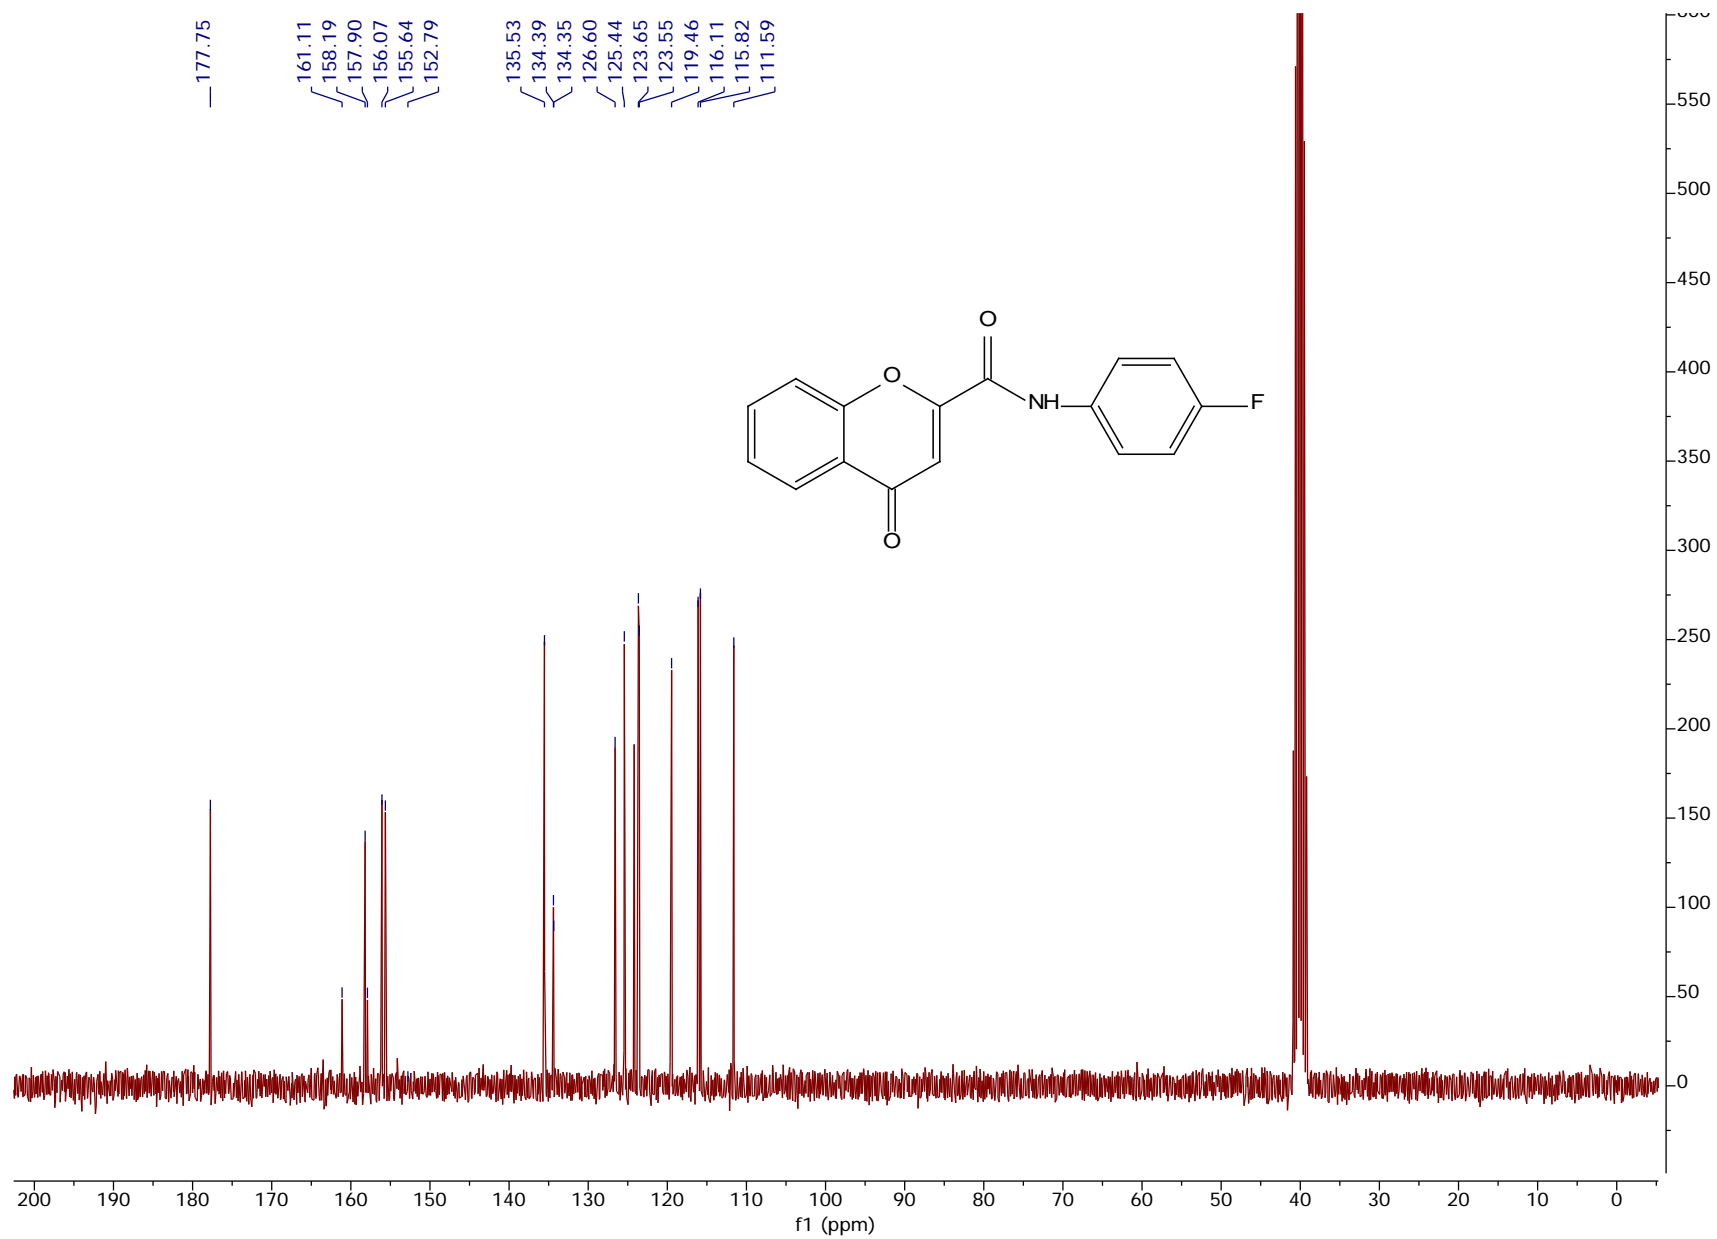



***N*-(4-Chlorophenyl)-4-oxo-4*H*-chromene-2-carboxamide (3f)**

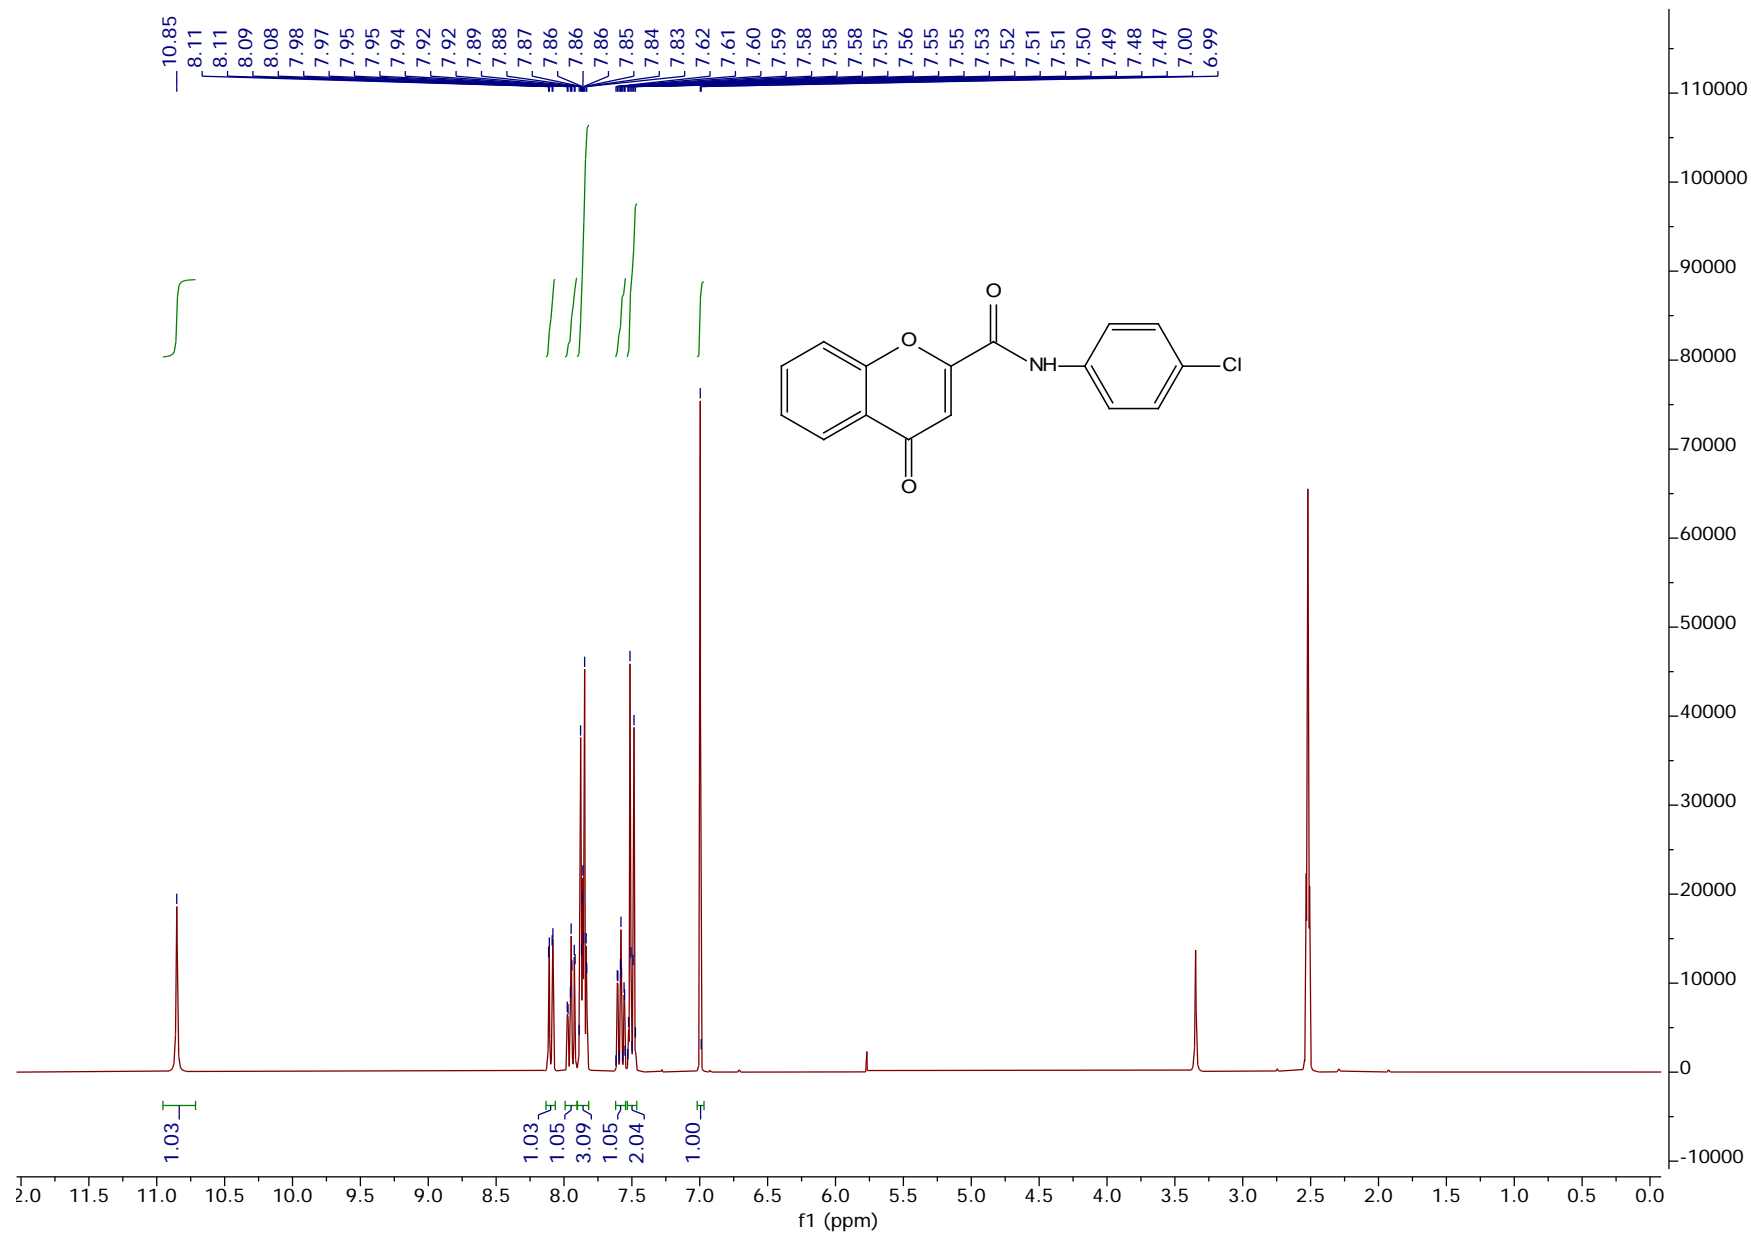

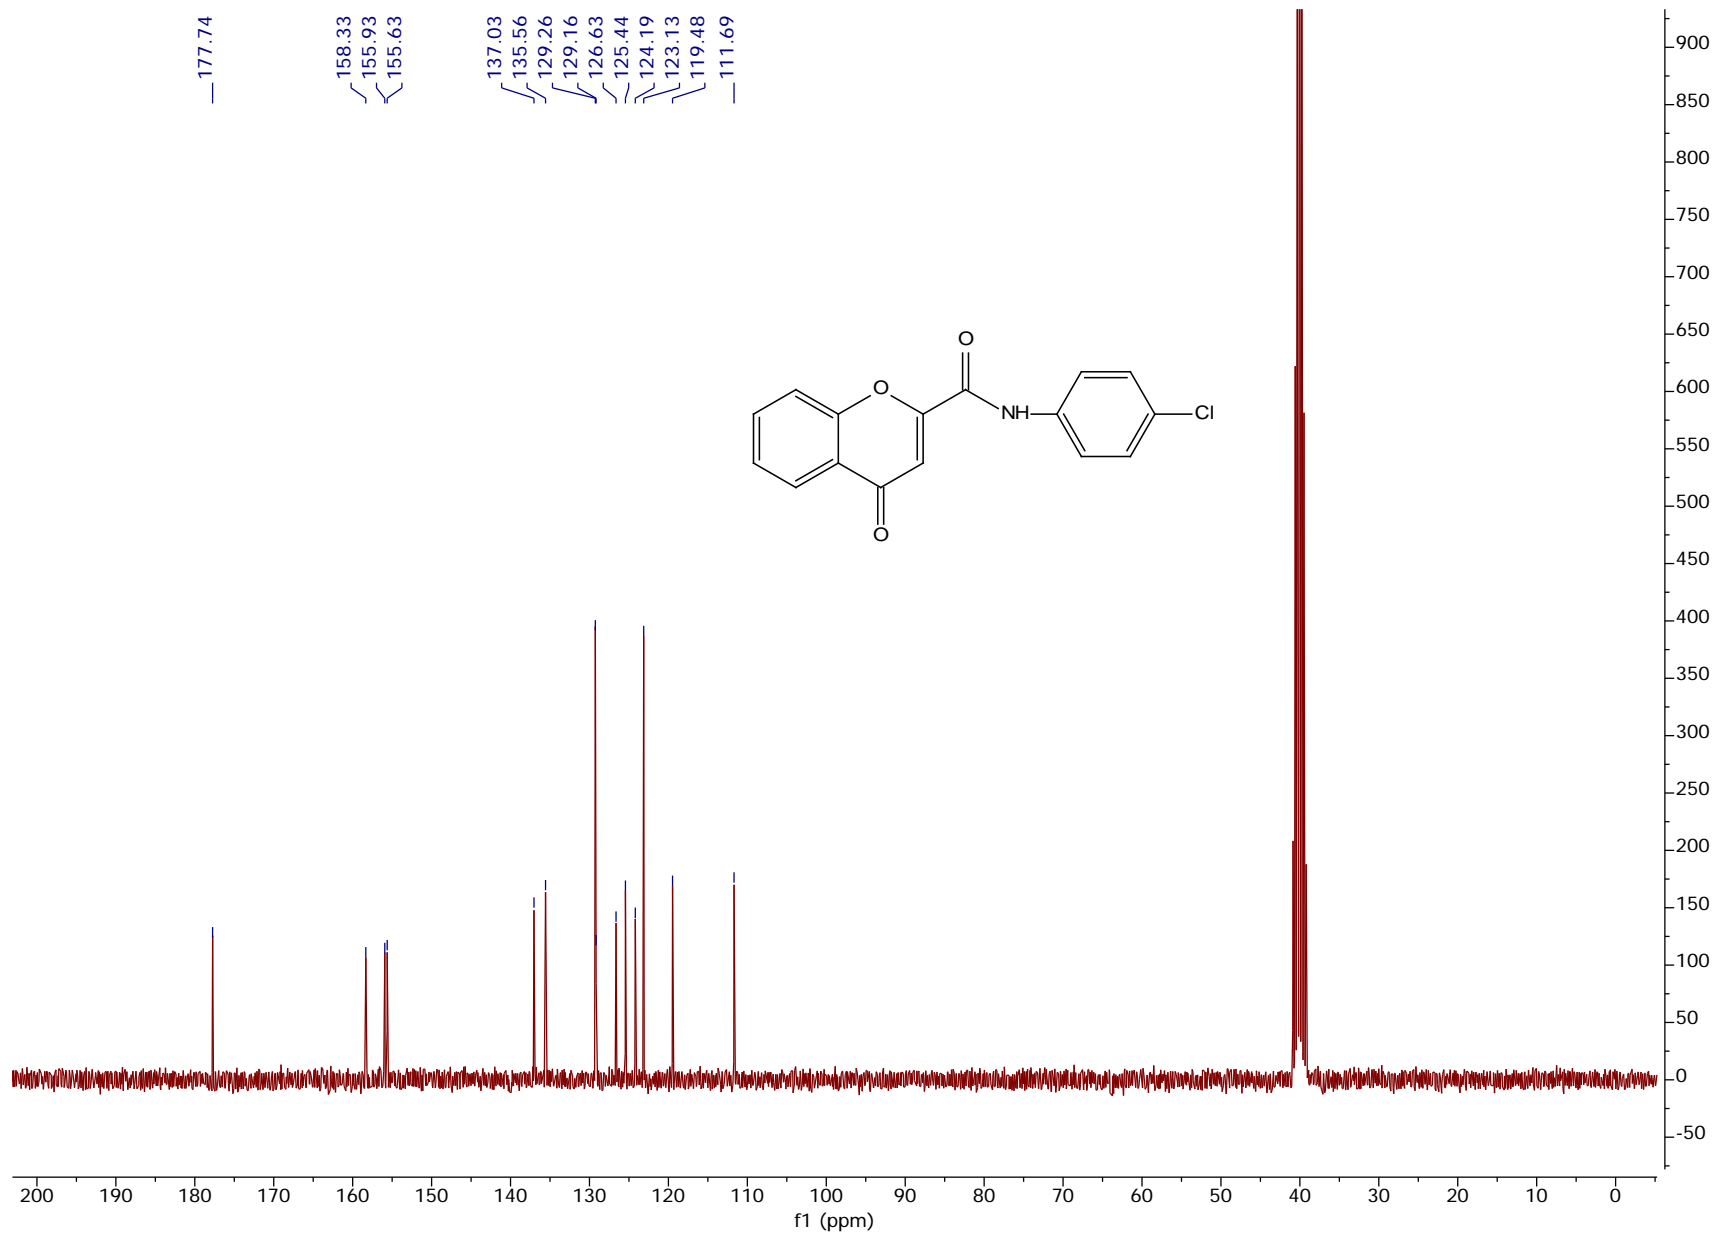

***N*-(4-Bromophenyl)-4-oxo-4*H*-chromene-2-carboxamide (3g)**

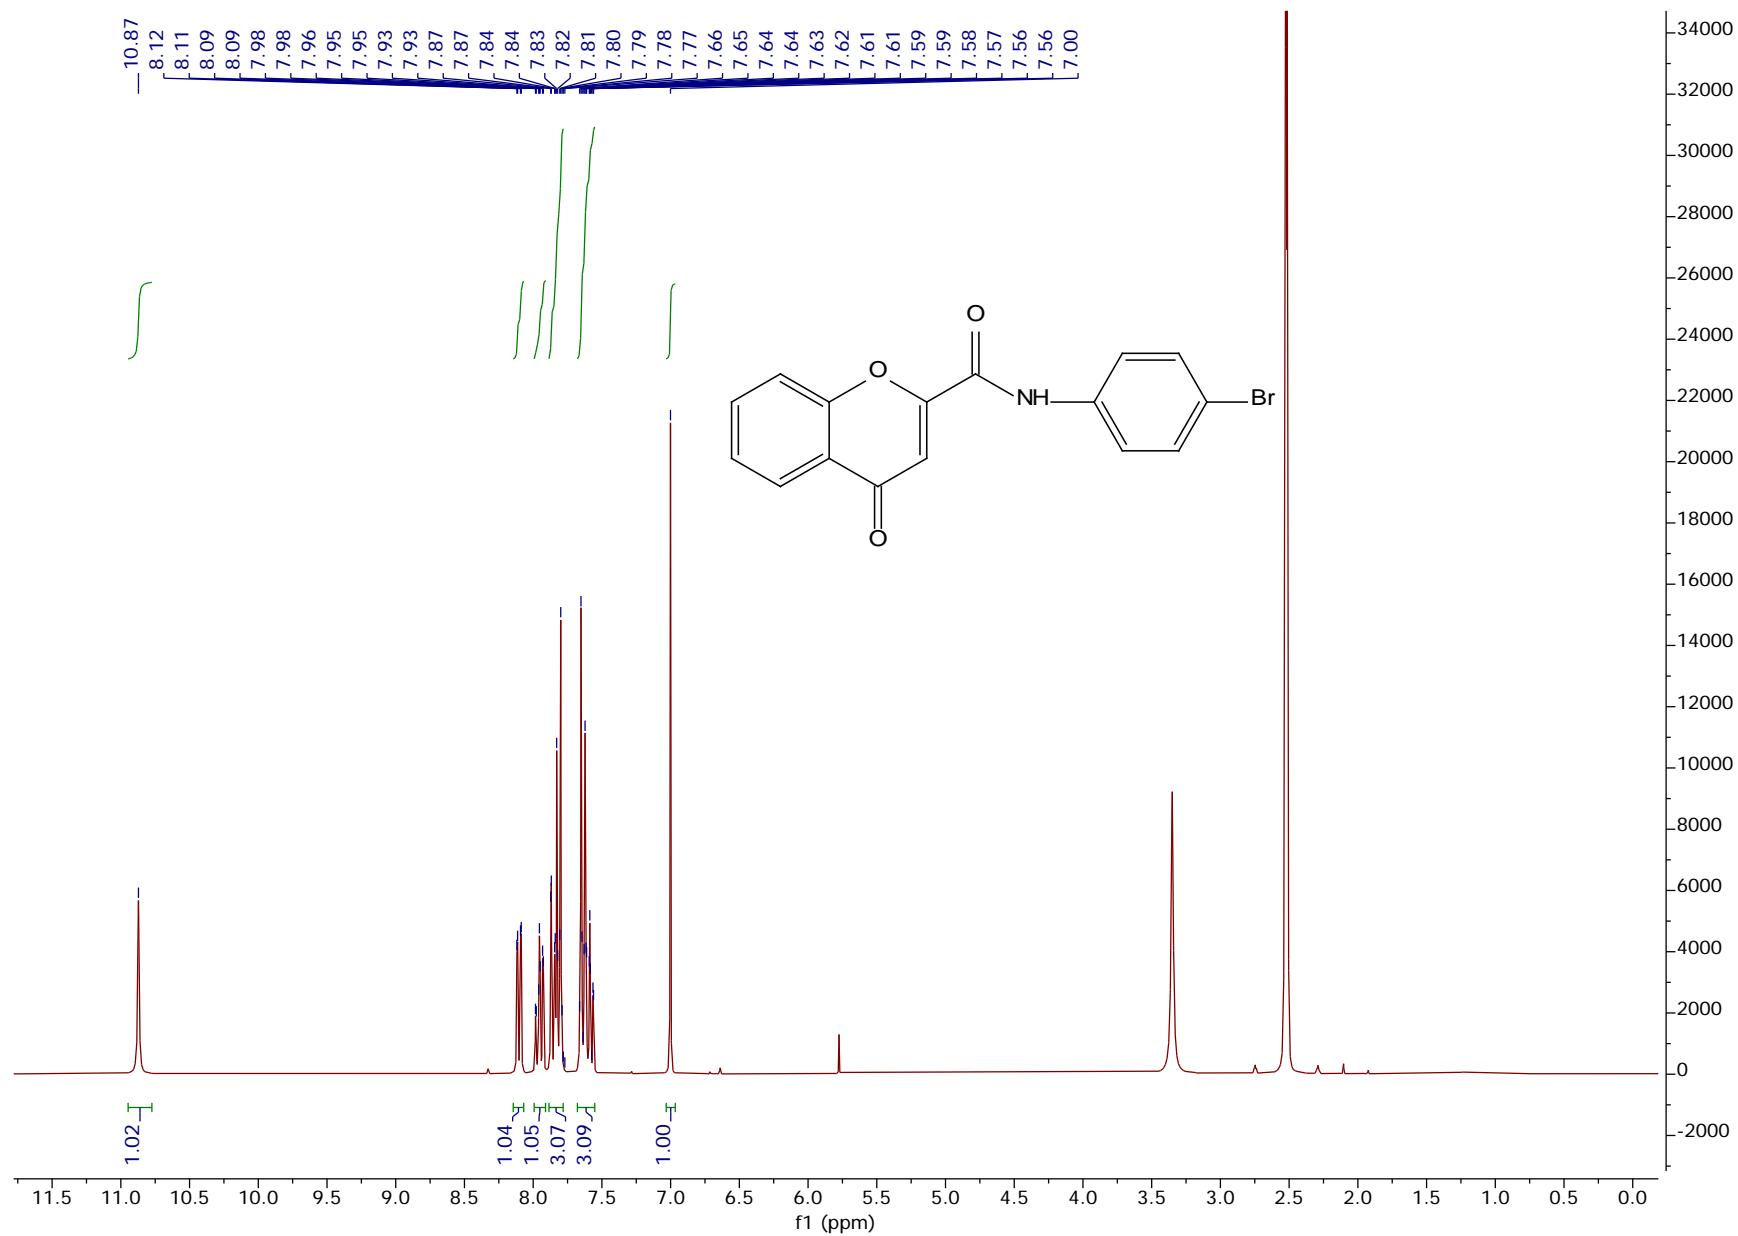

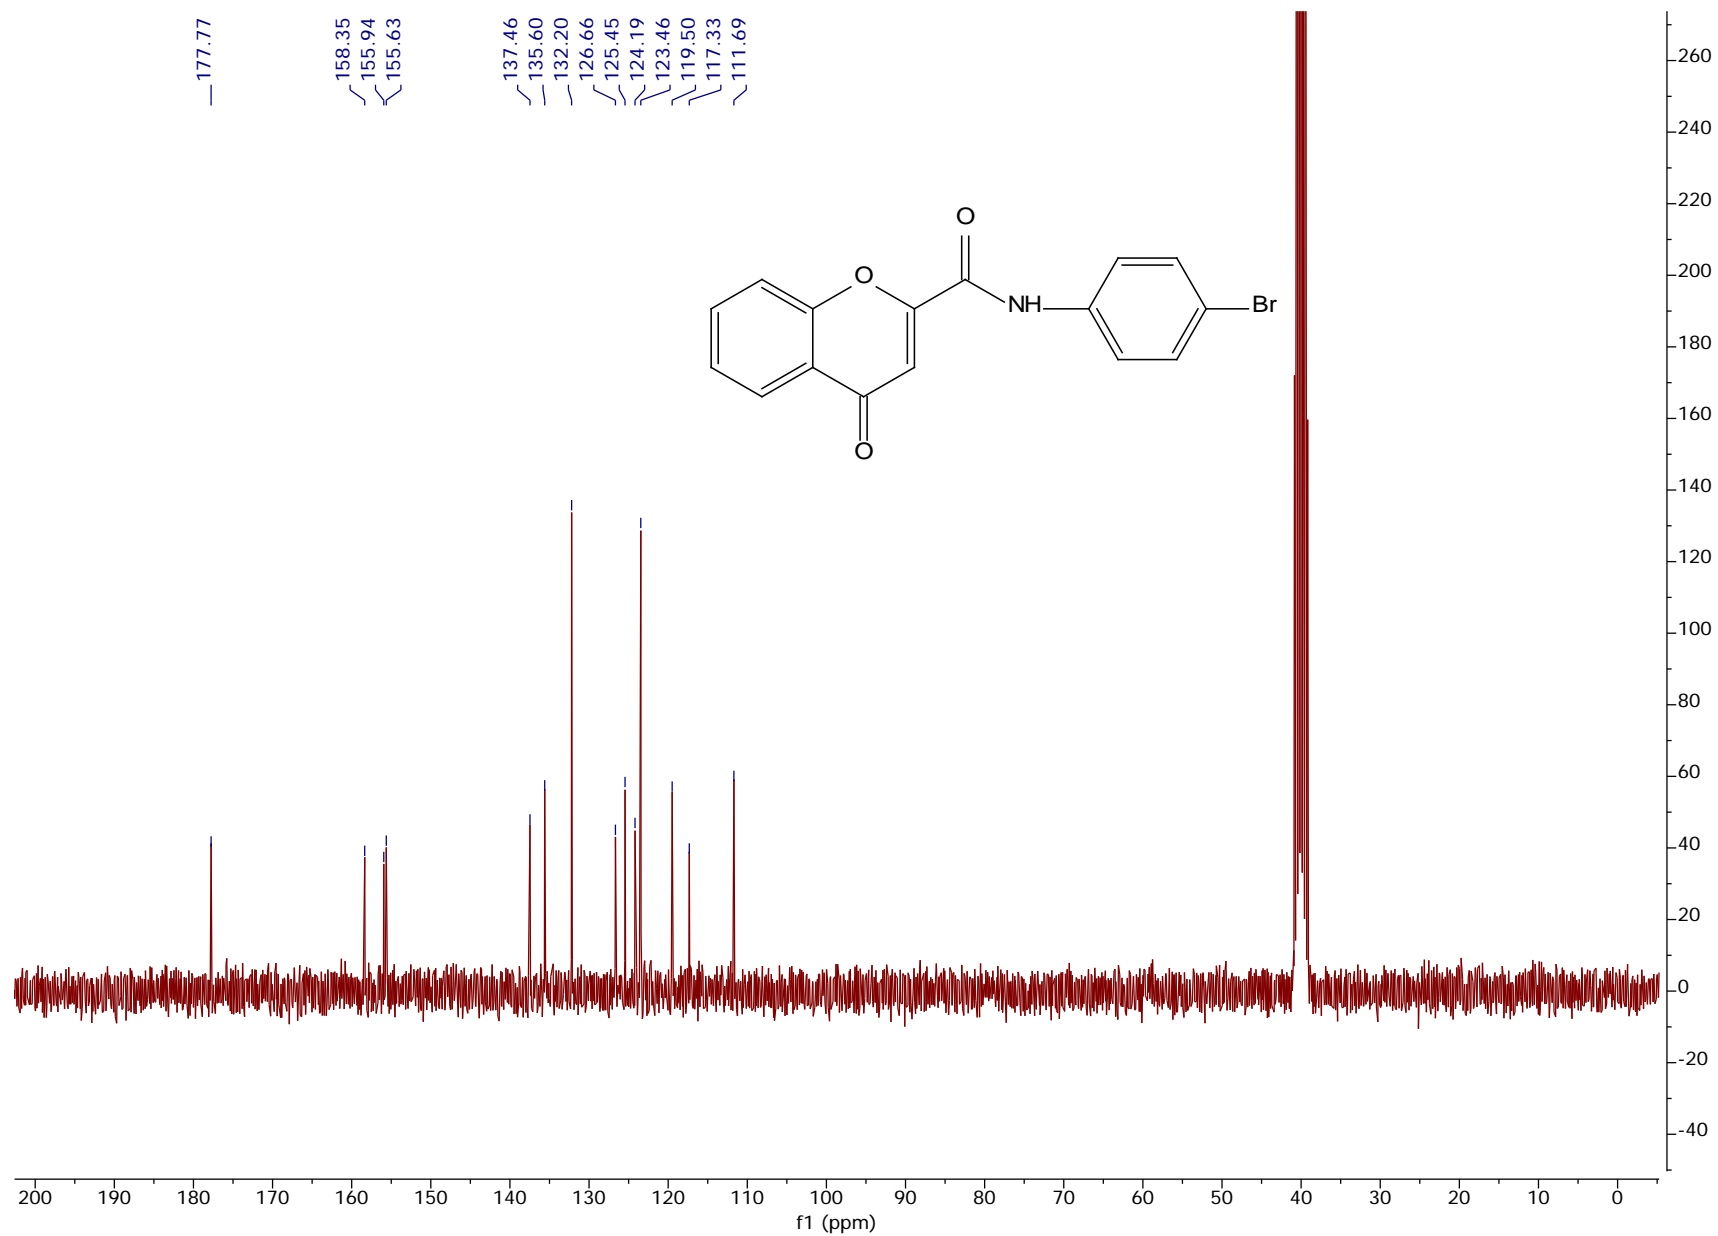

***N*-(2-Fluorophenyl)-4-oxo-4*H*-chromene-2-carboxamide (3h)**

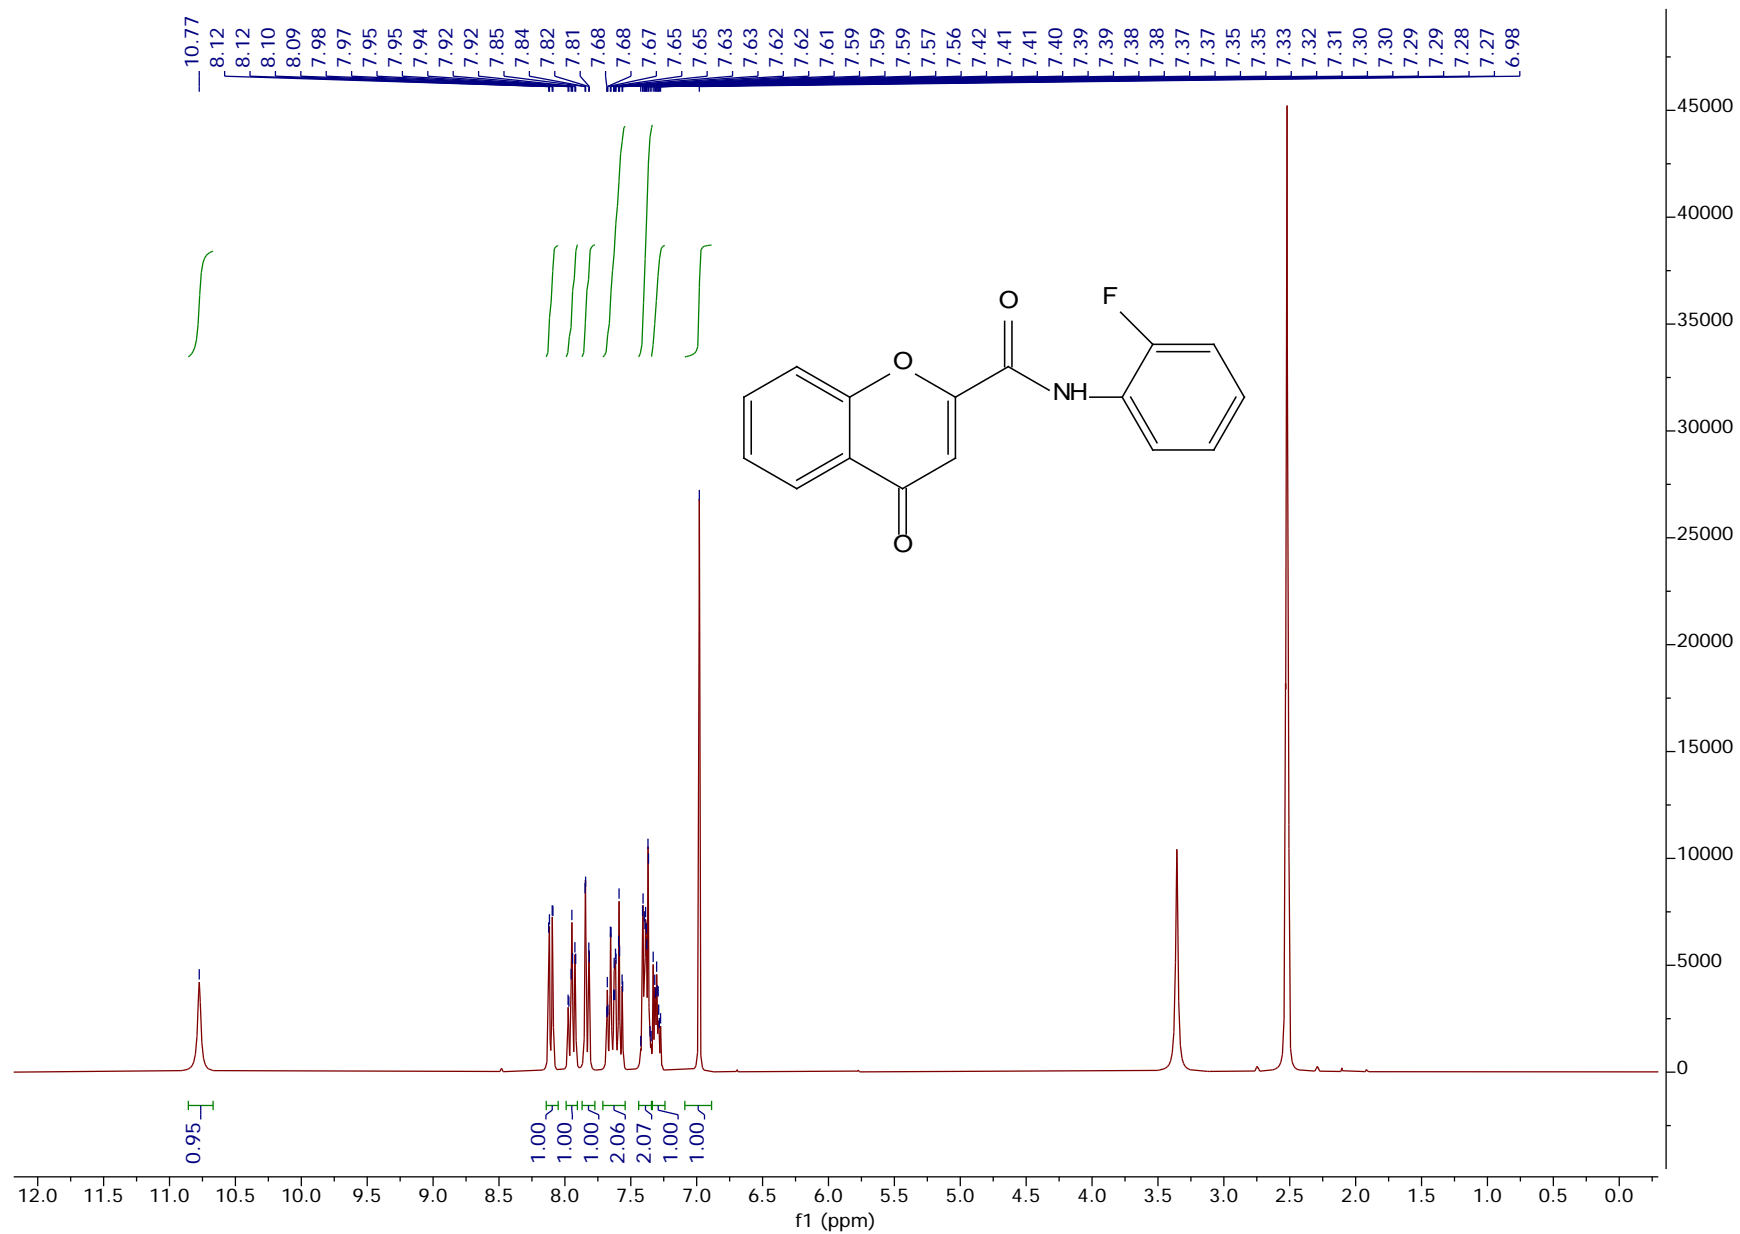

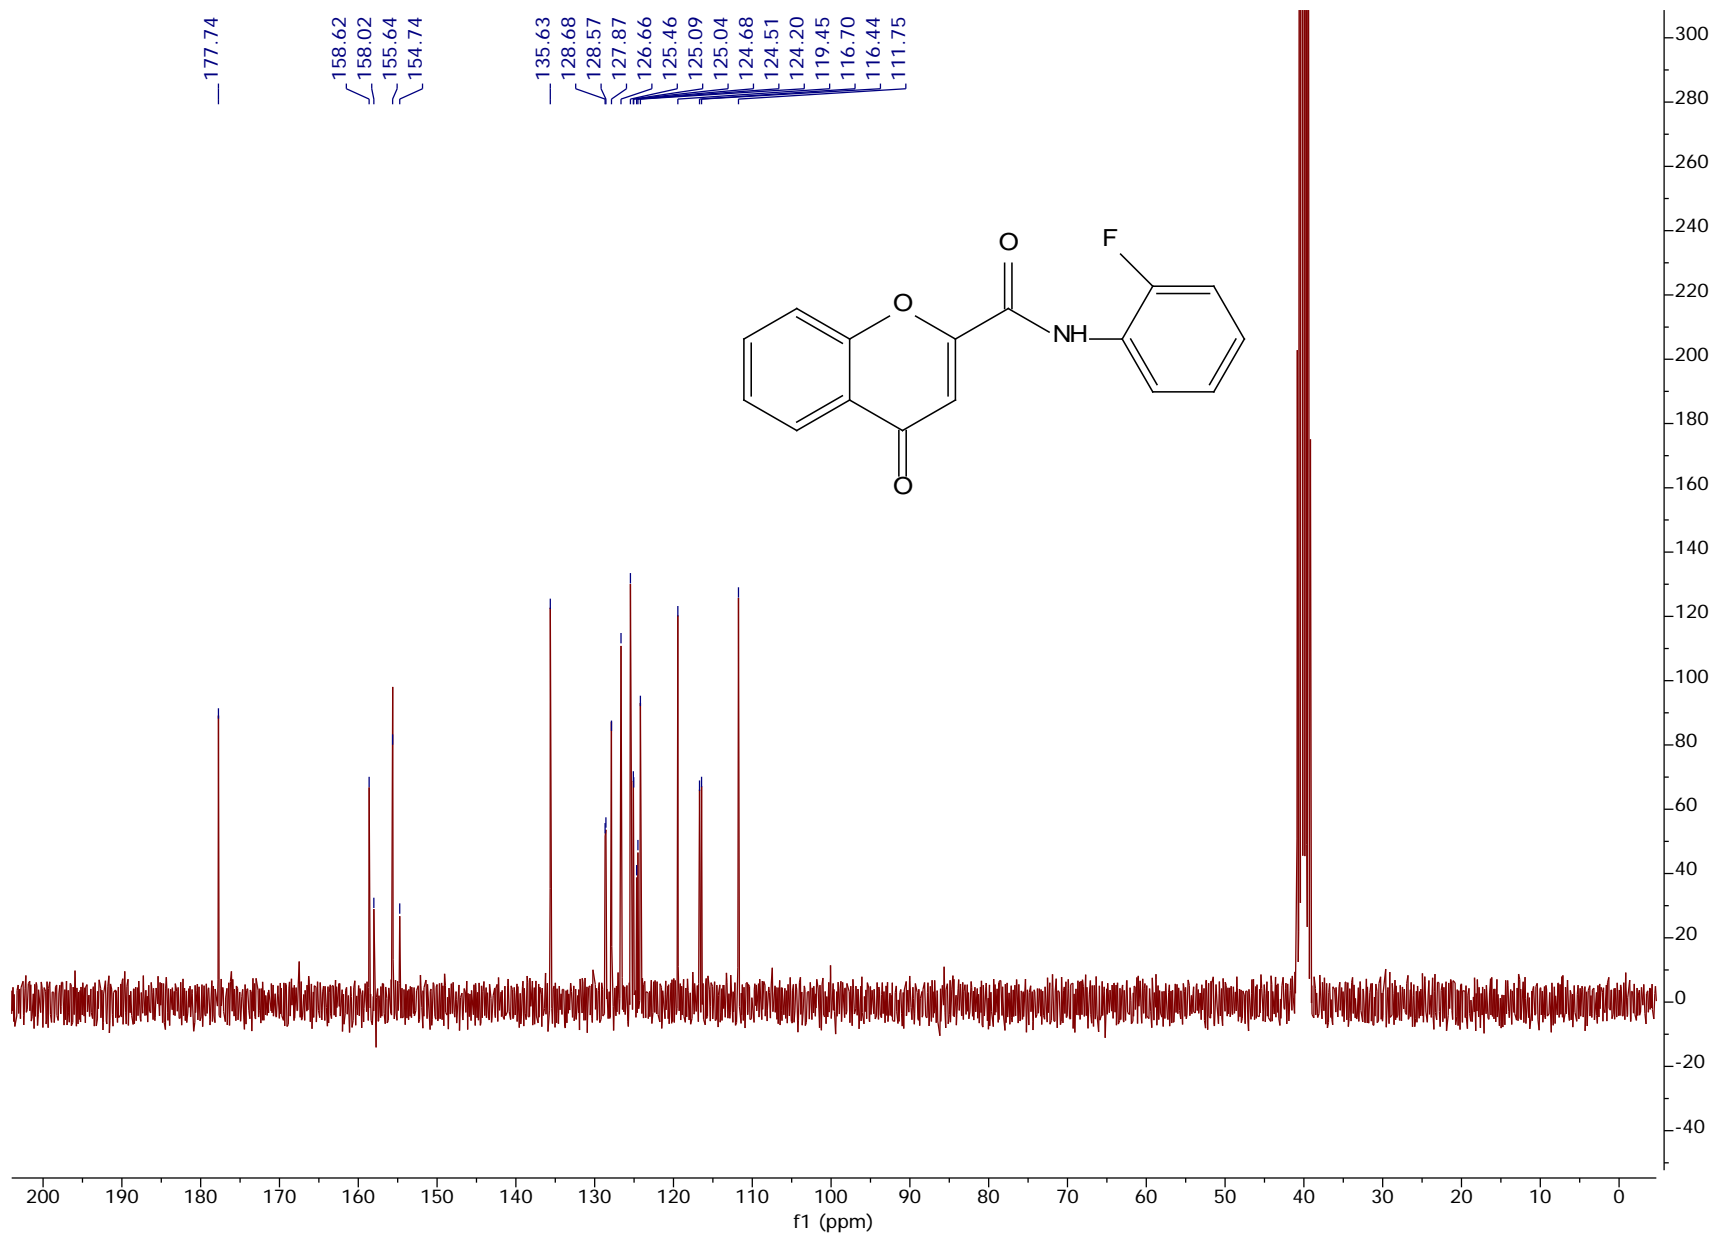

***N*-(2-Chlorophenyl)-4-oxo-4*H*-chromene-2-carboxamide (3i)**

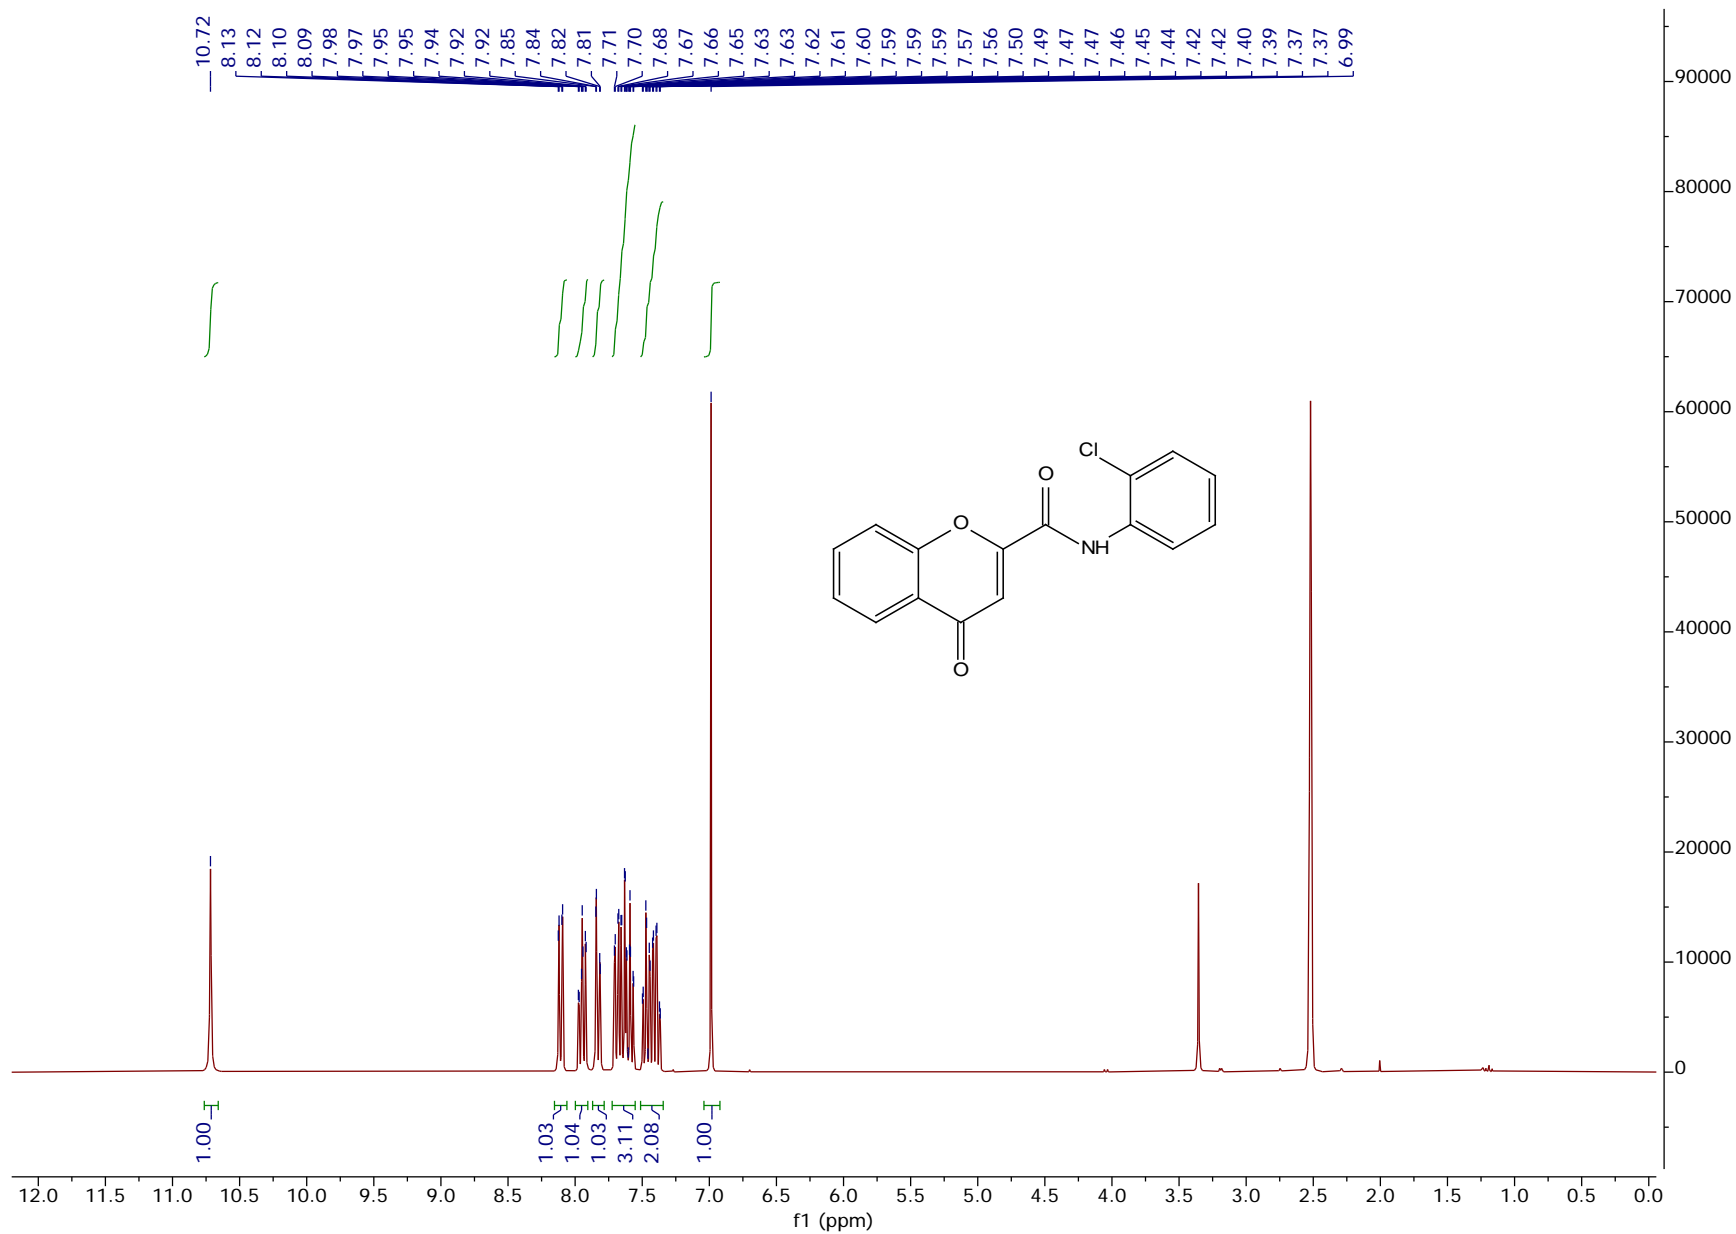

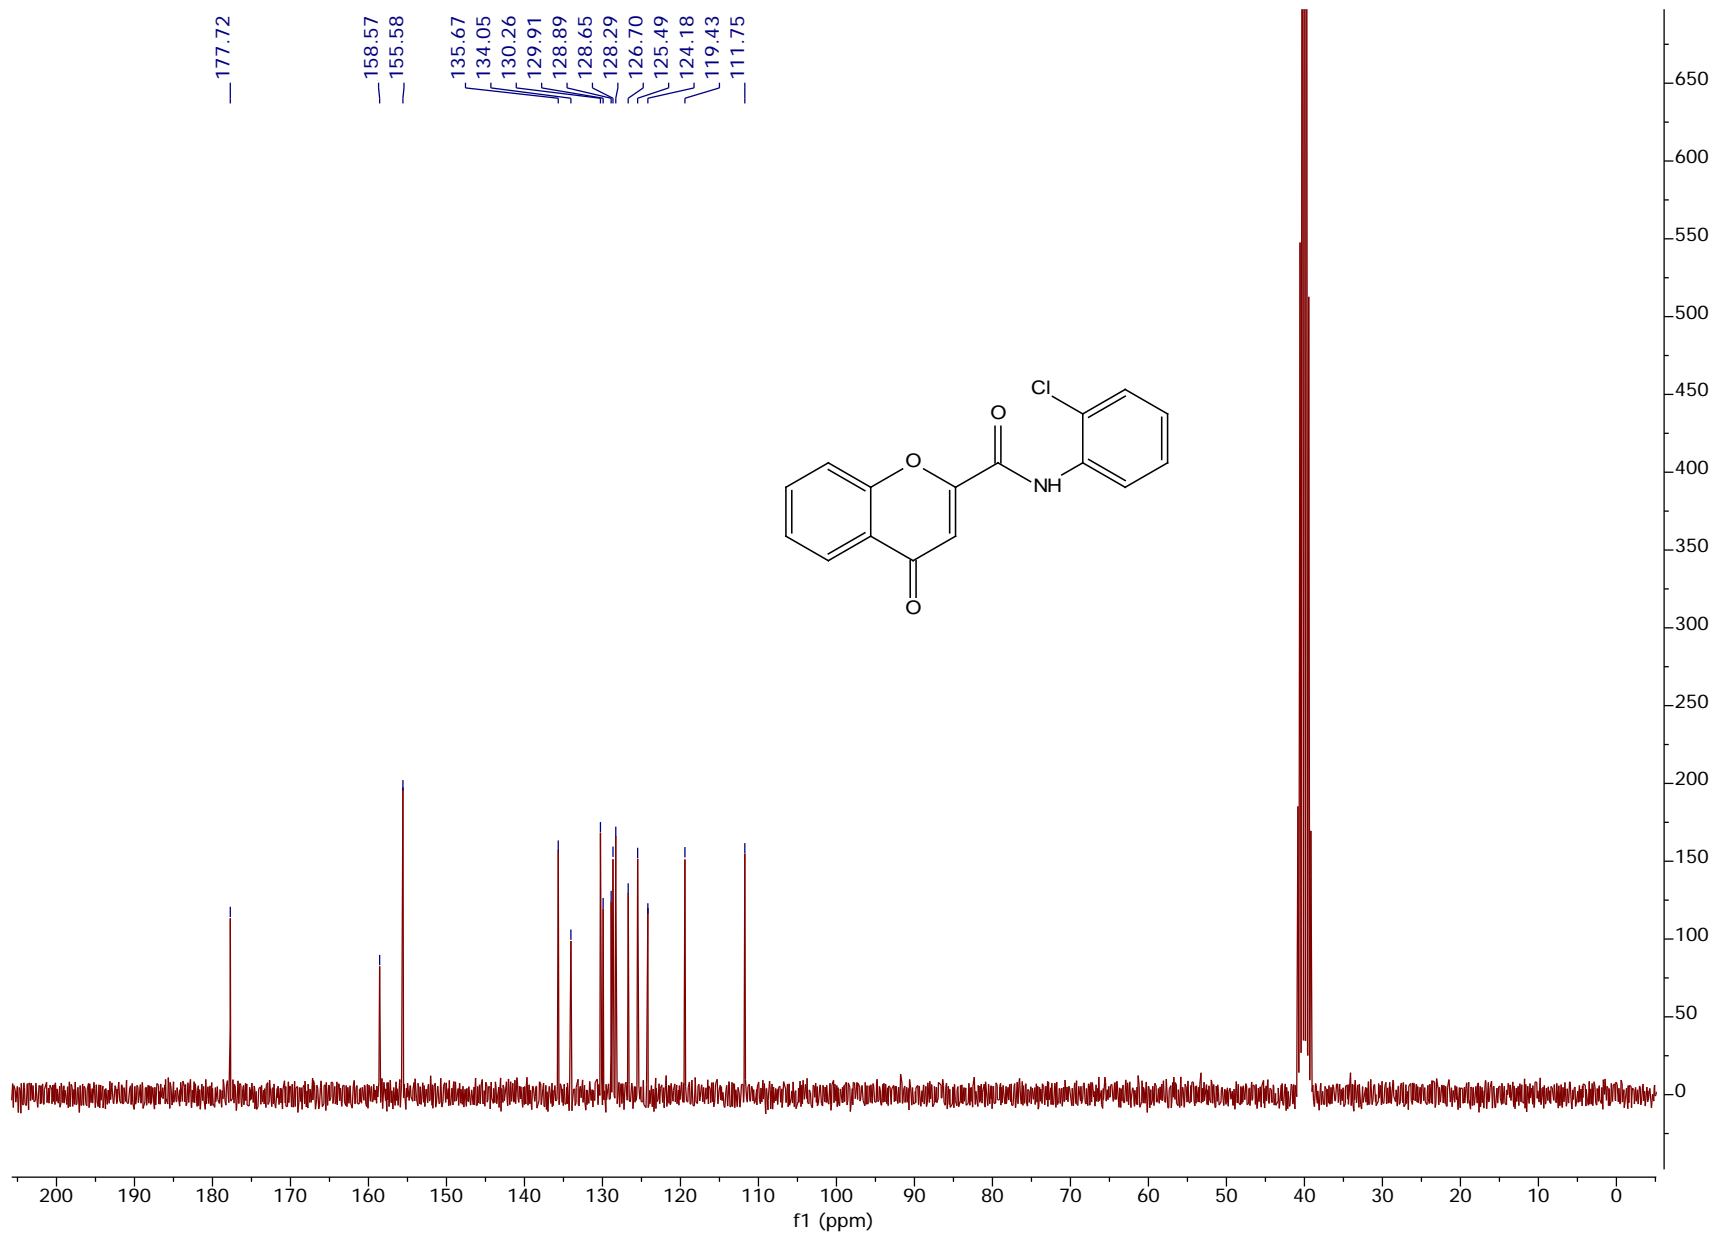



Chemical structure: O=C1C(=O)C(=C(NC2=CC=CC=C2)C3=CC=CC=C3)OC4=CC=CC=C14

<sup>1</sup>H NMR spectrum (ppm):

- 10.69 (s, 1H, integration 0.98)
- 7.94-7.78 (m, 8H, integration 1.00, 1.03, 1.02, 1.01, 1.02, 1.02, 1.02, 1.01)
- 7.33 (s, 2H, integration 0.97)
- 7.31 (s, 2H, integration 0.97)

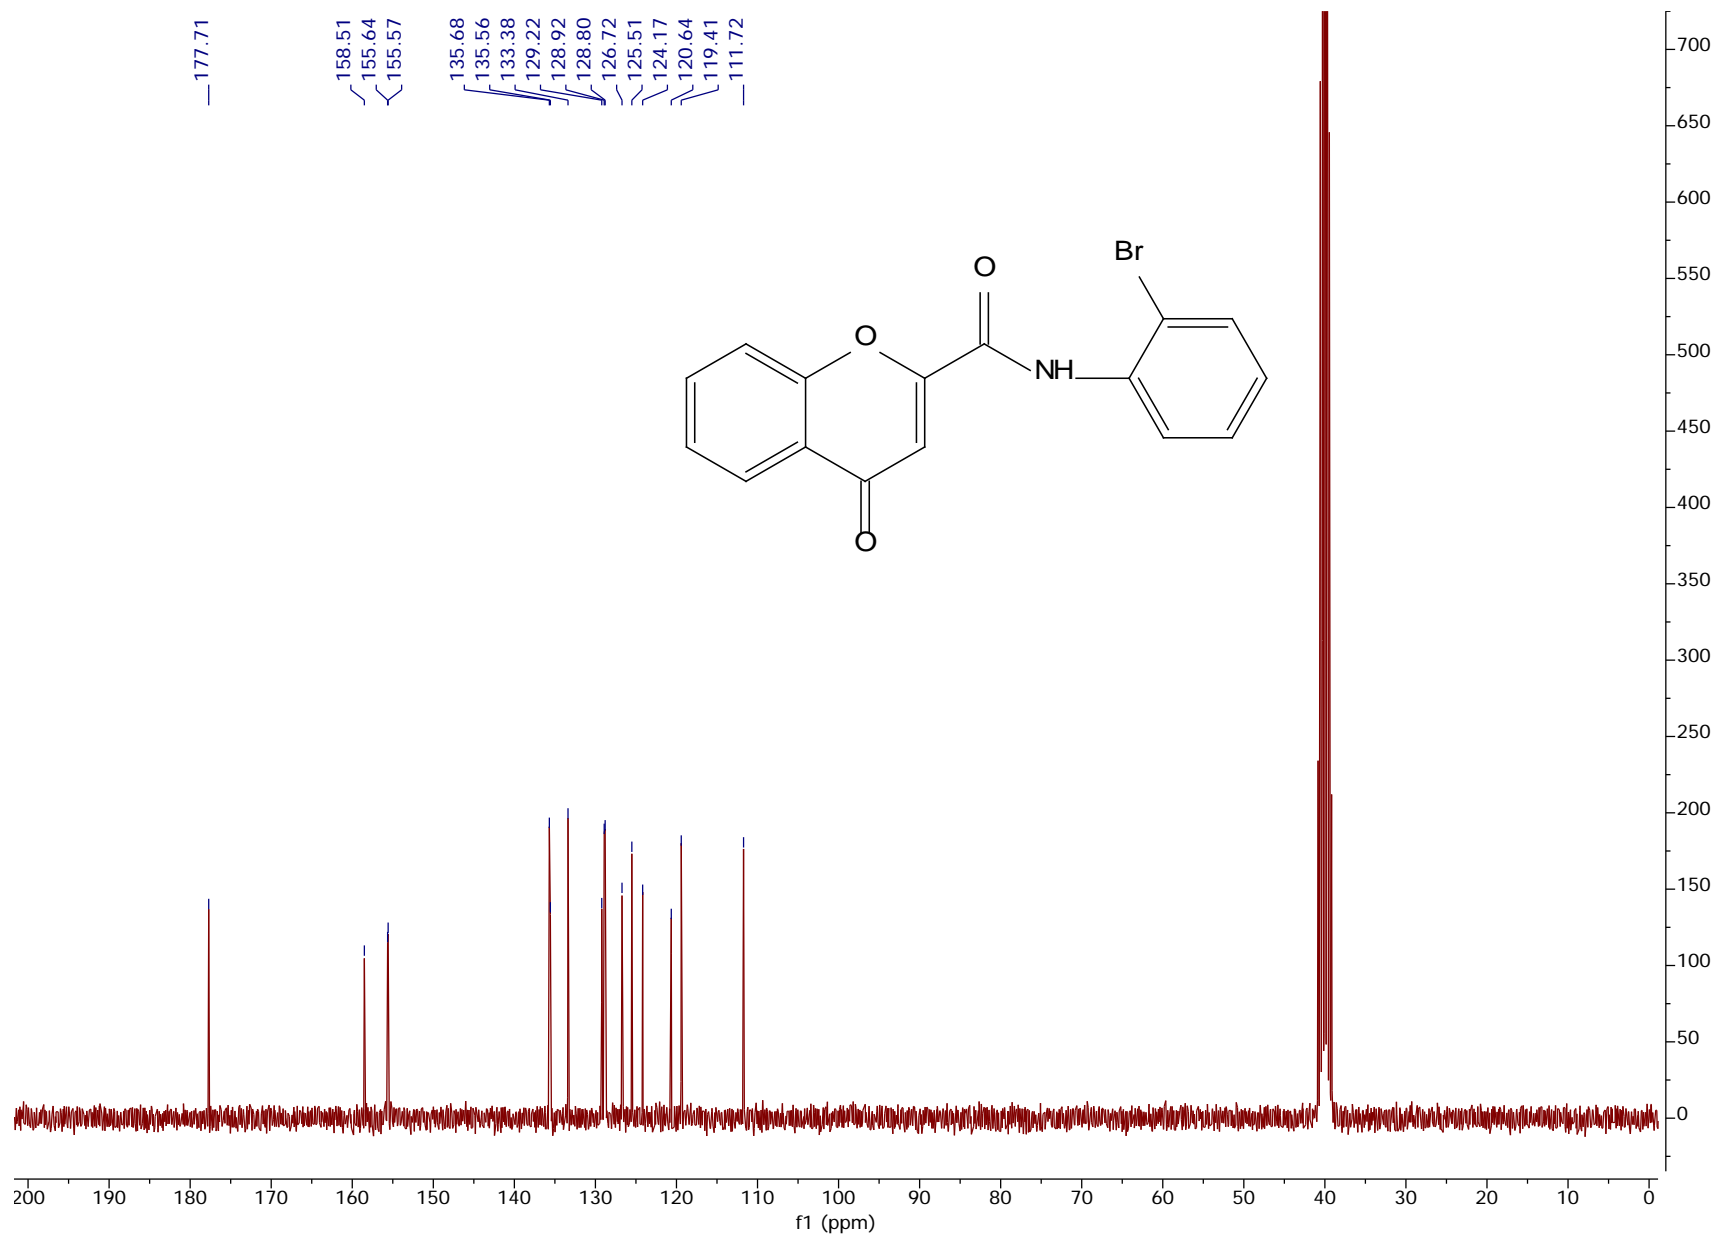

***N*-(2-Chloro-4-fluorophenyl)-4-oxo-4*H*-chromene-2-carboxamide (3k)**

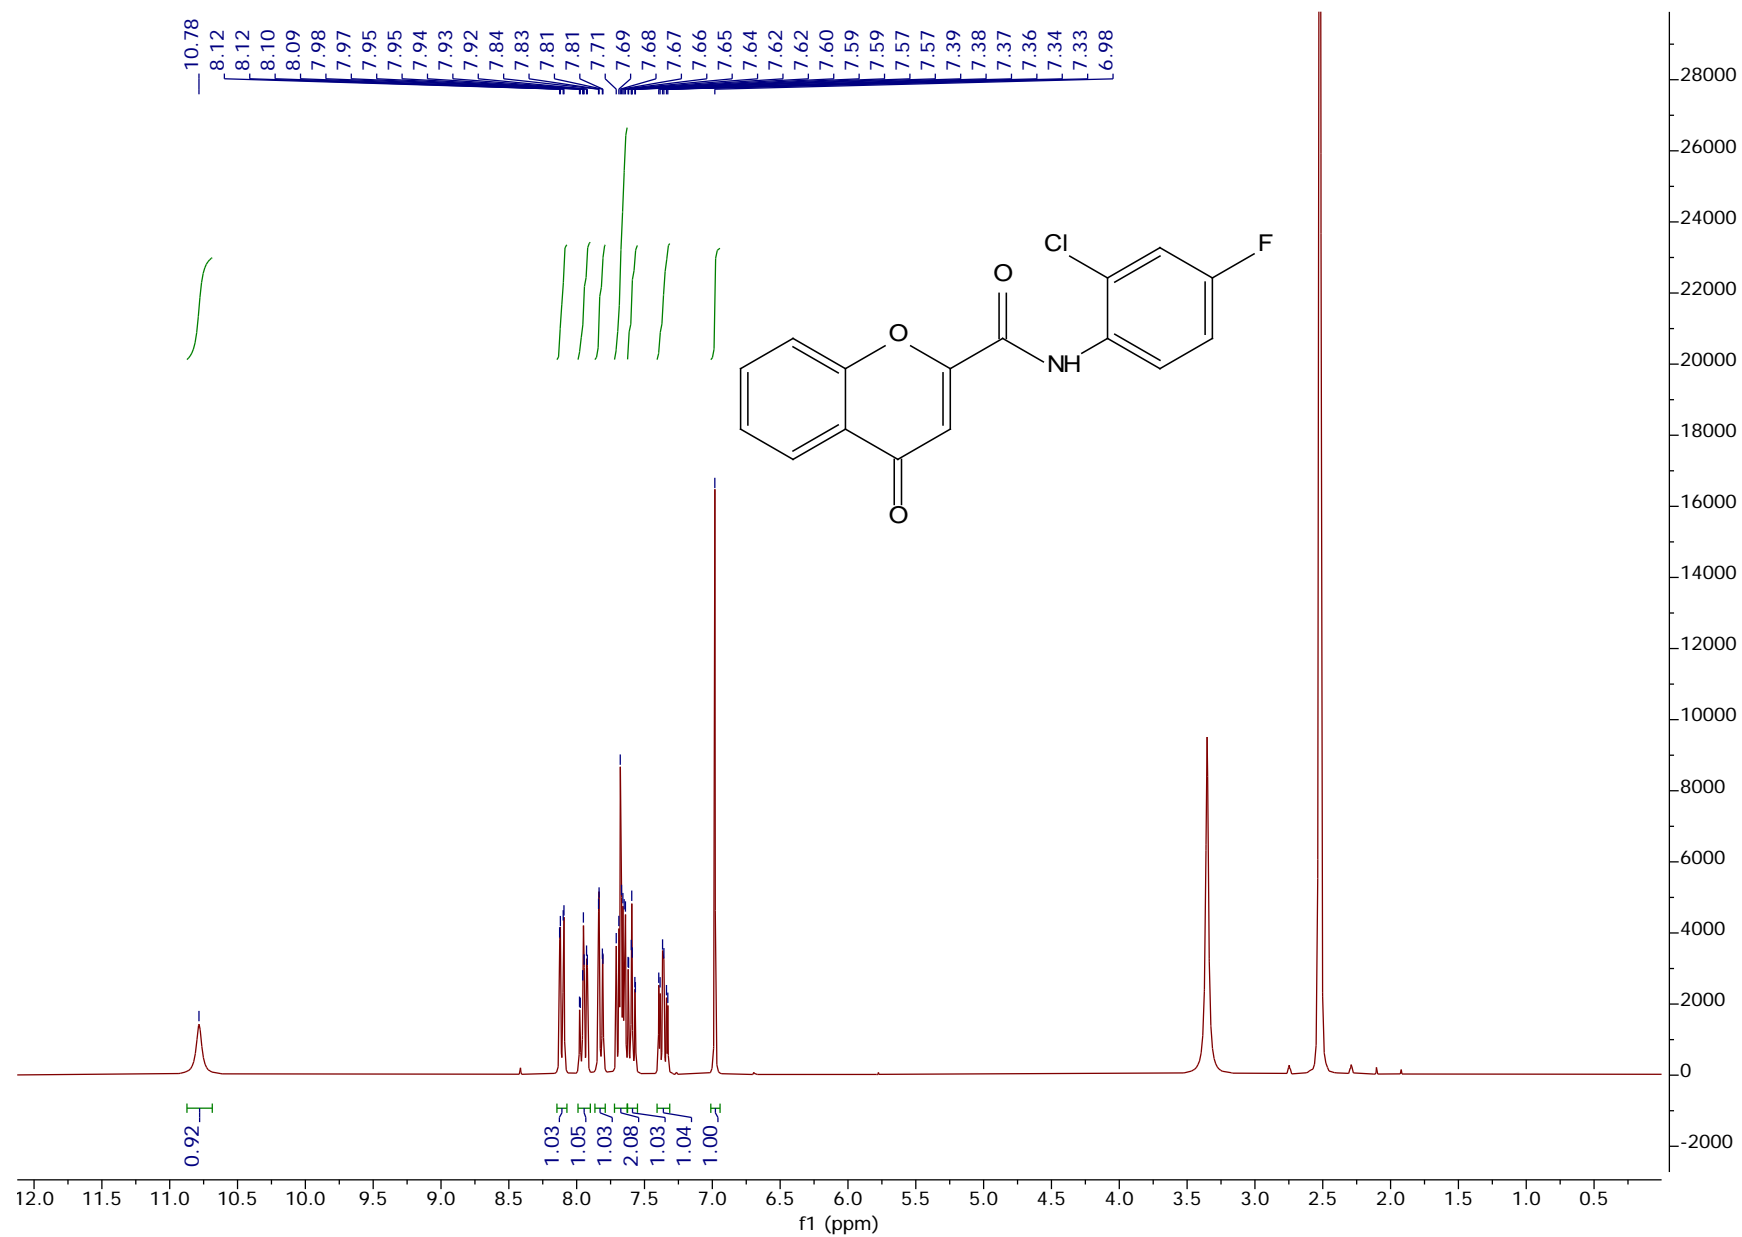

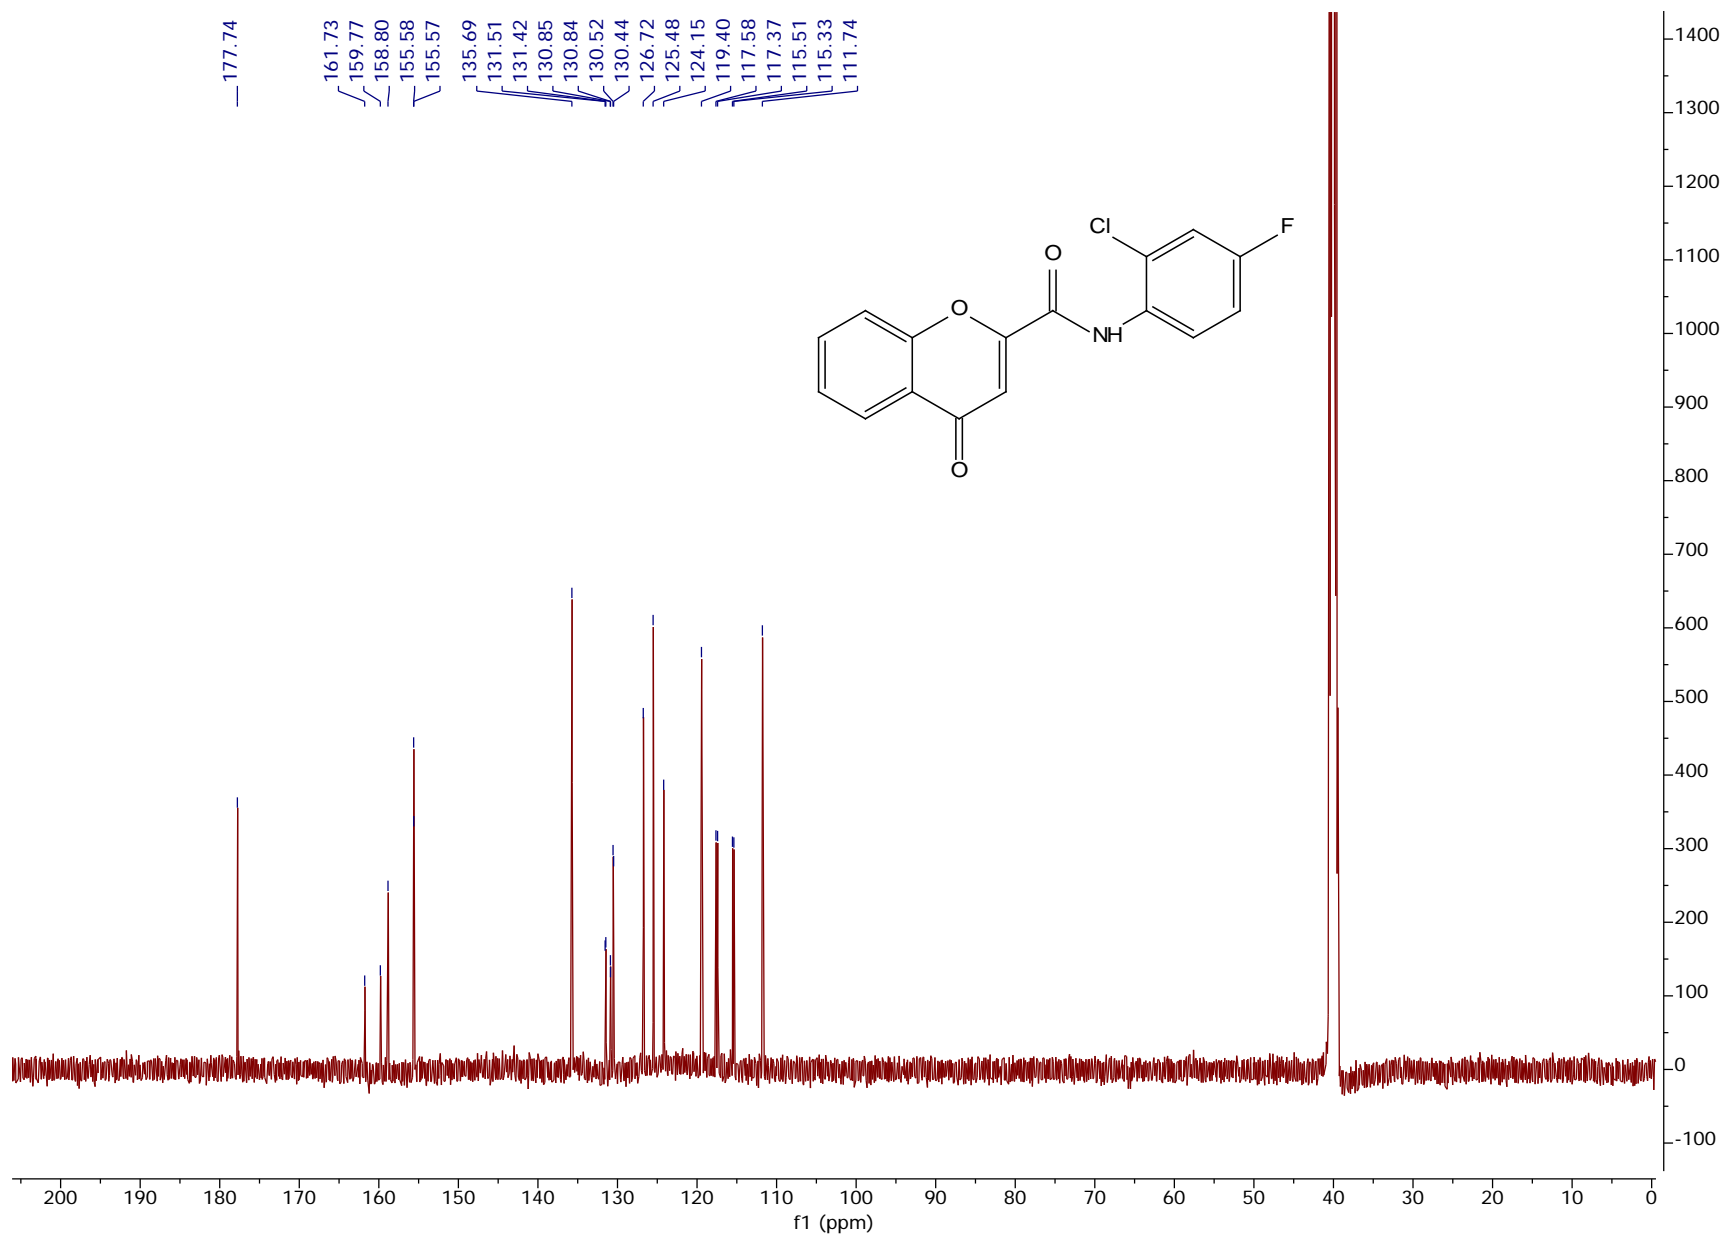

N-(3-Chloro-4-fluorophenyl)-4-oxo-4H-chromene-2-carboxamide (3I)

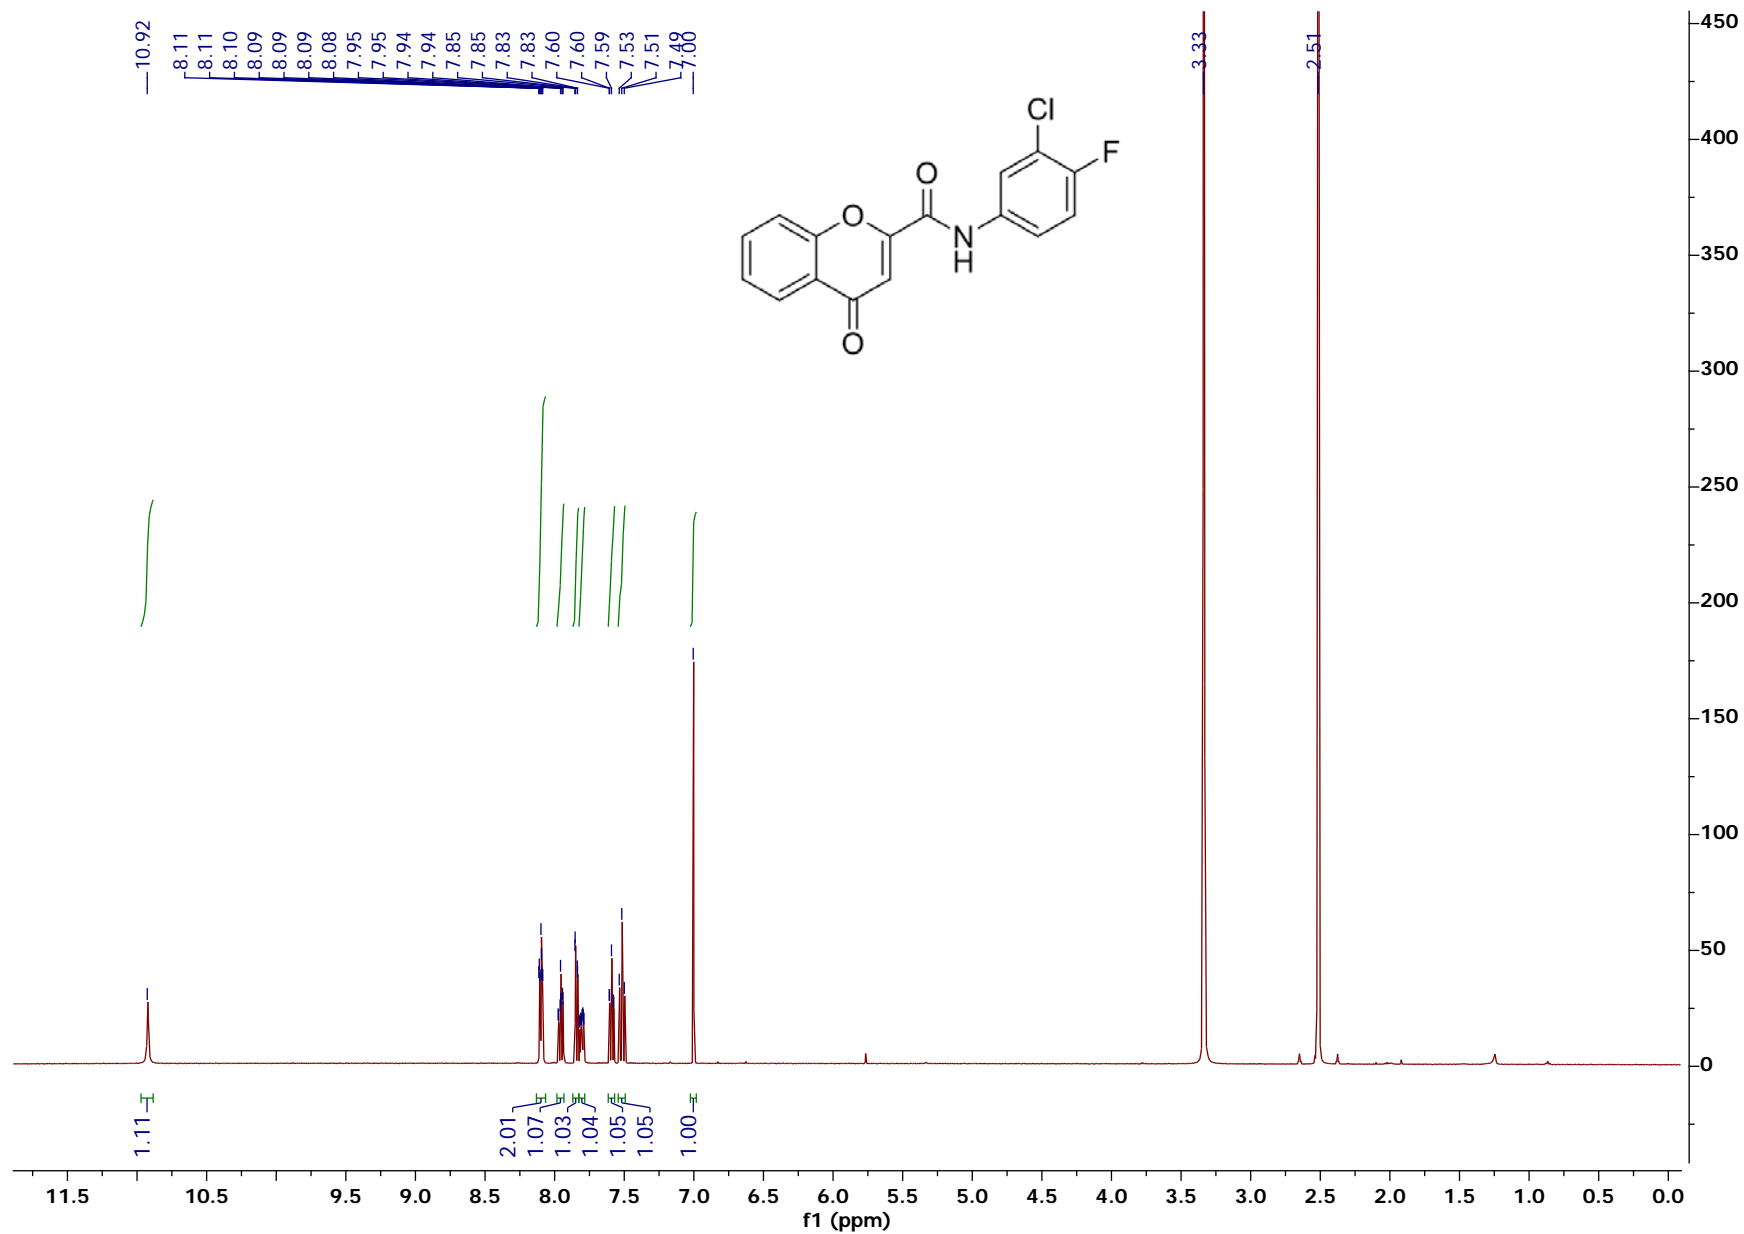

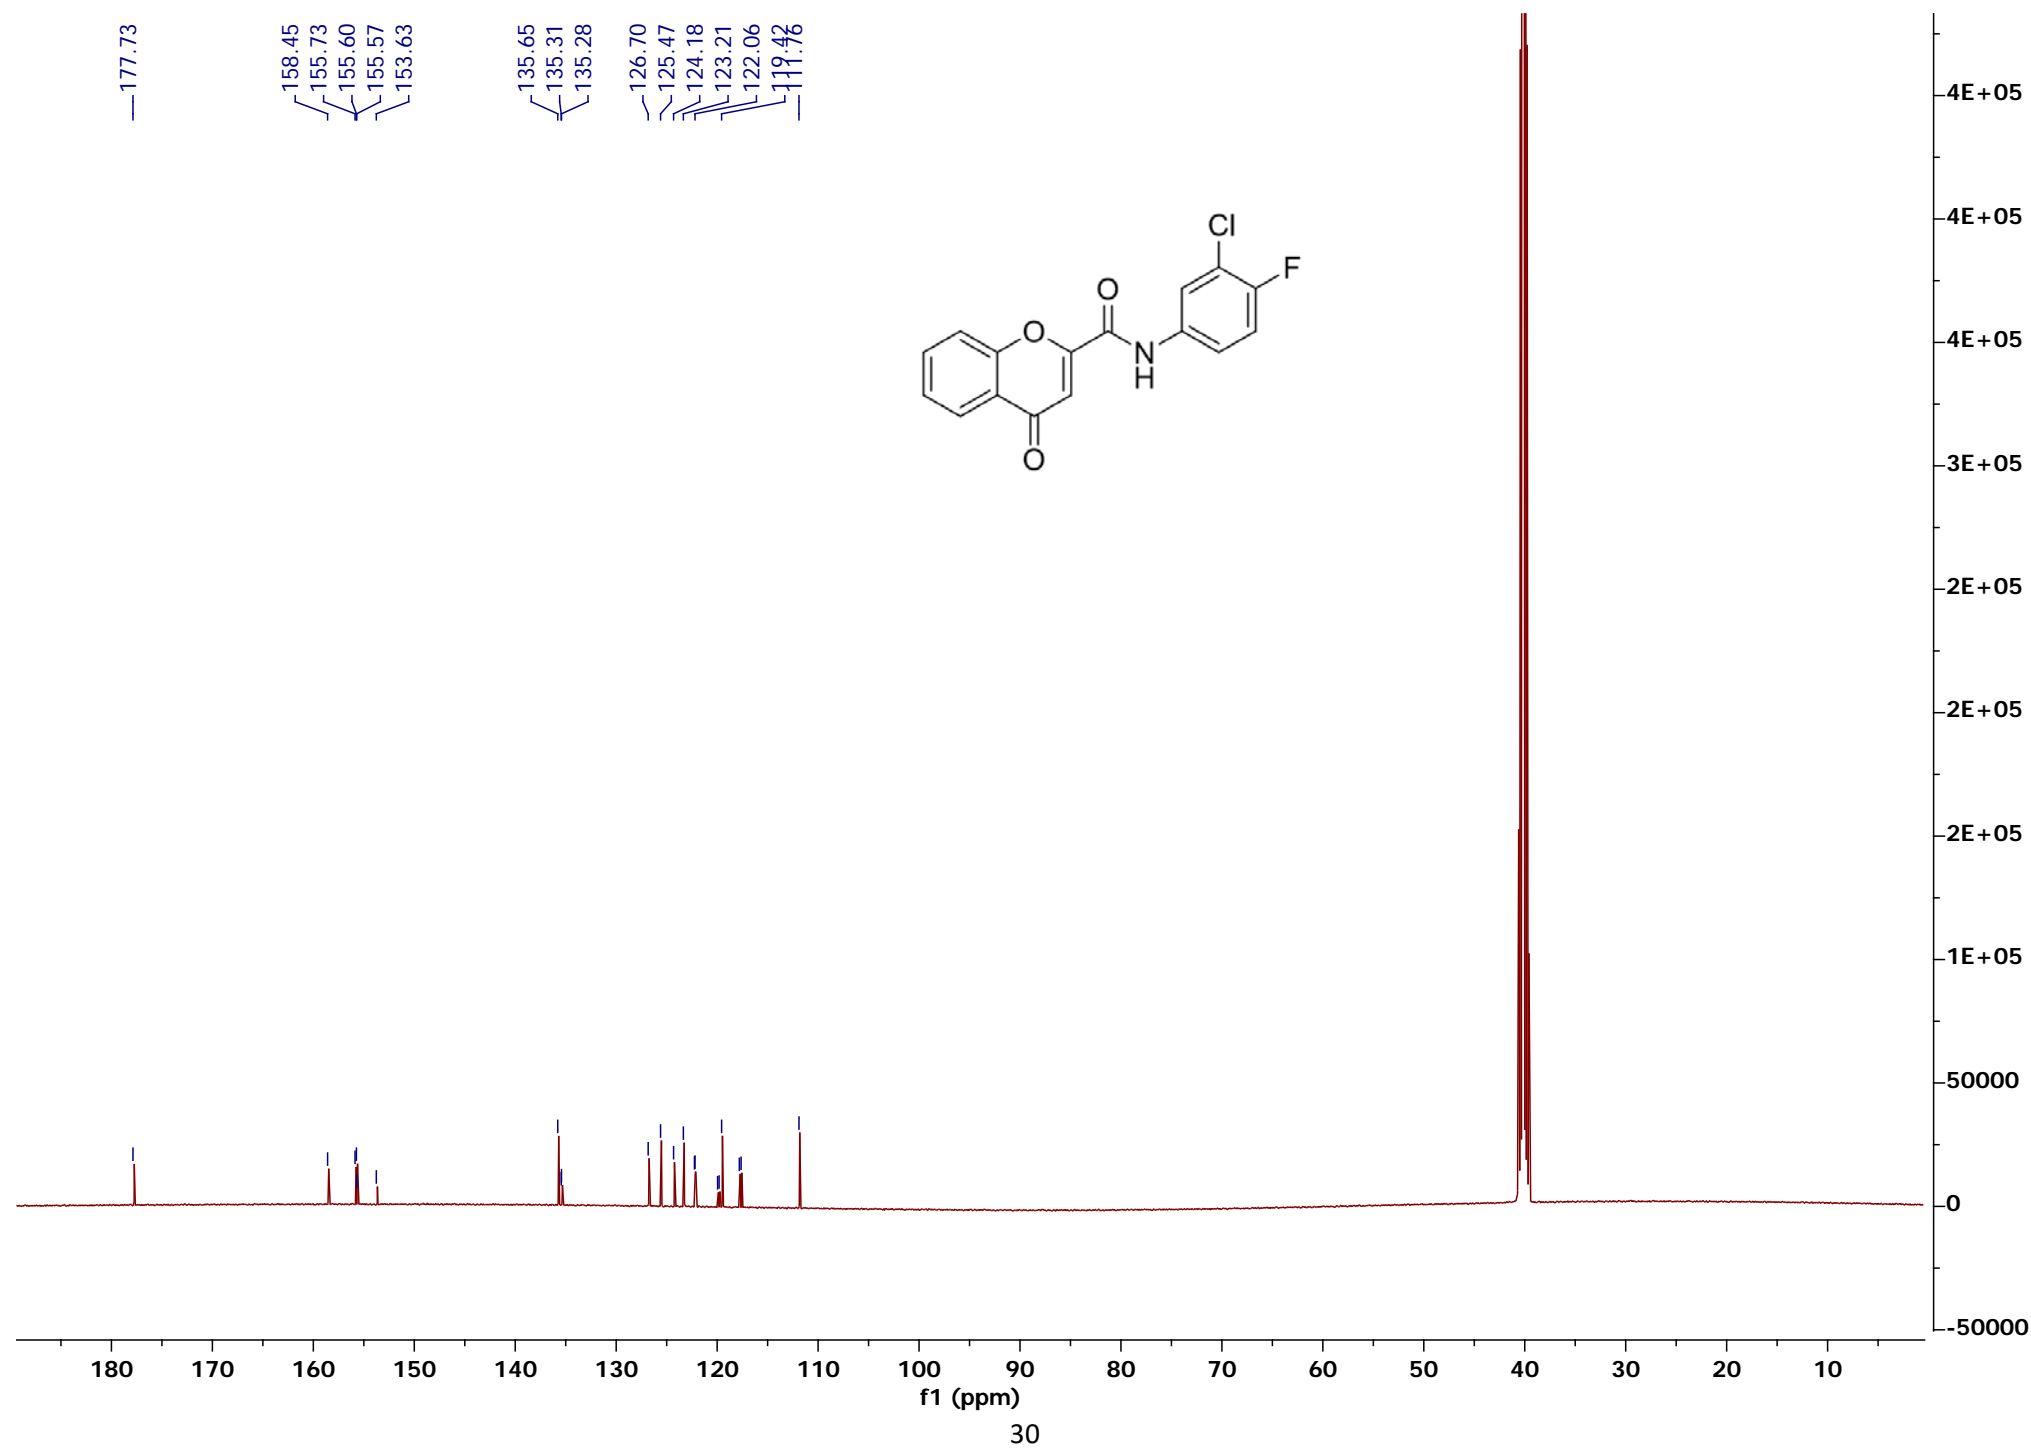

***N*-(4-Nitrophenyl)-4-oxo-4*H*-chromene-2-carboxamide (3m)**

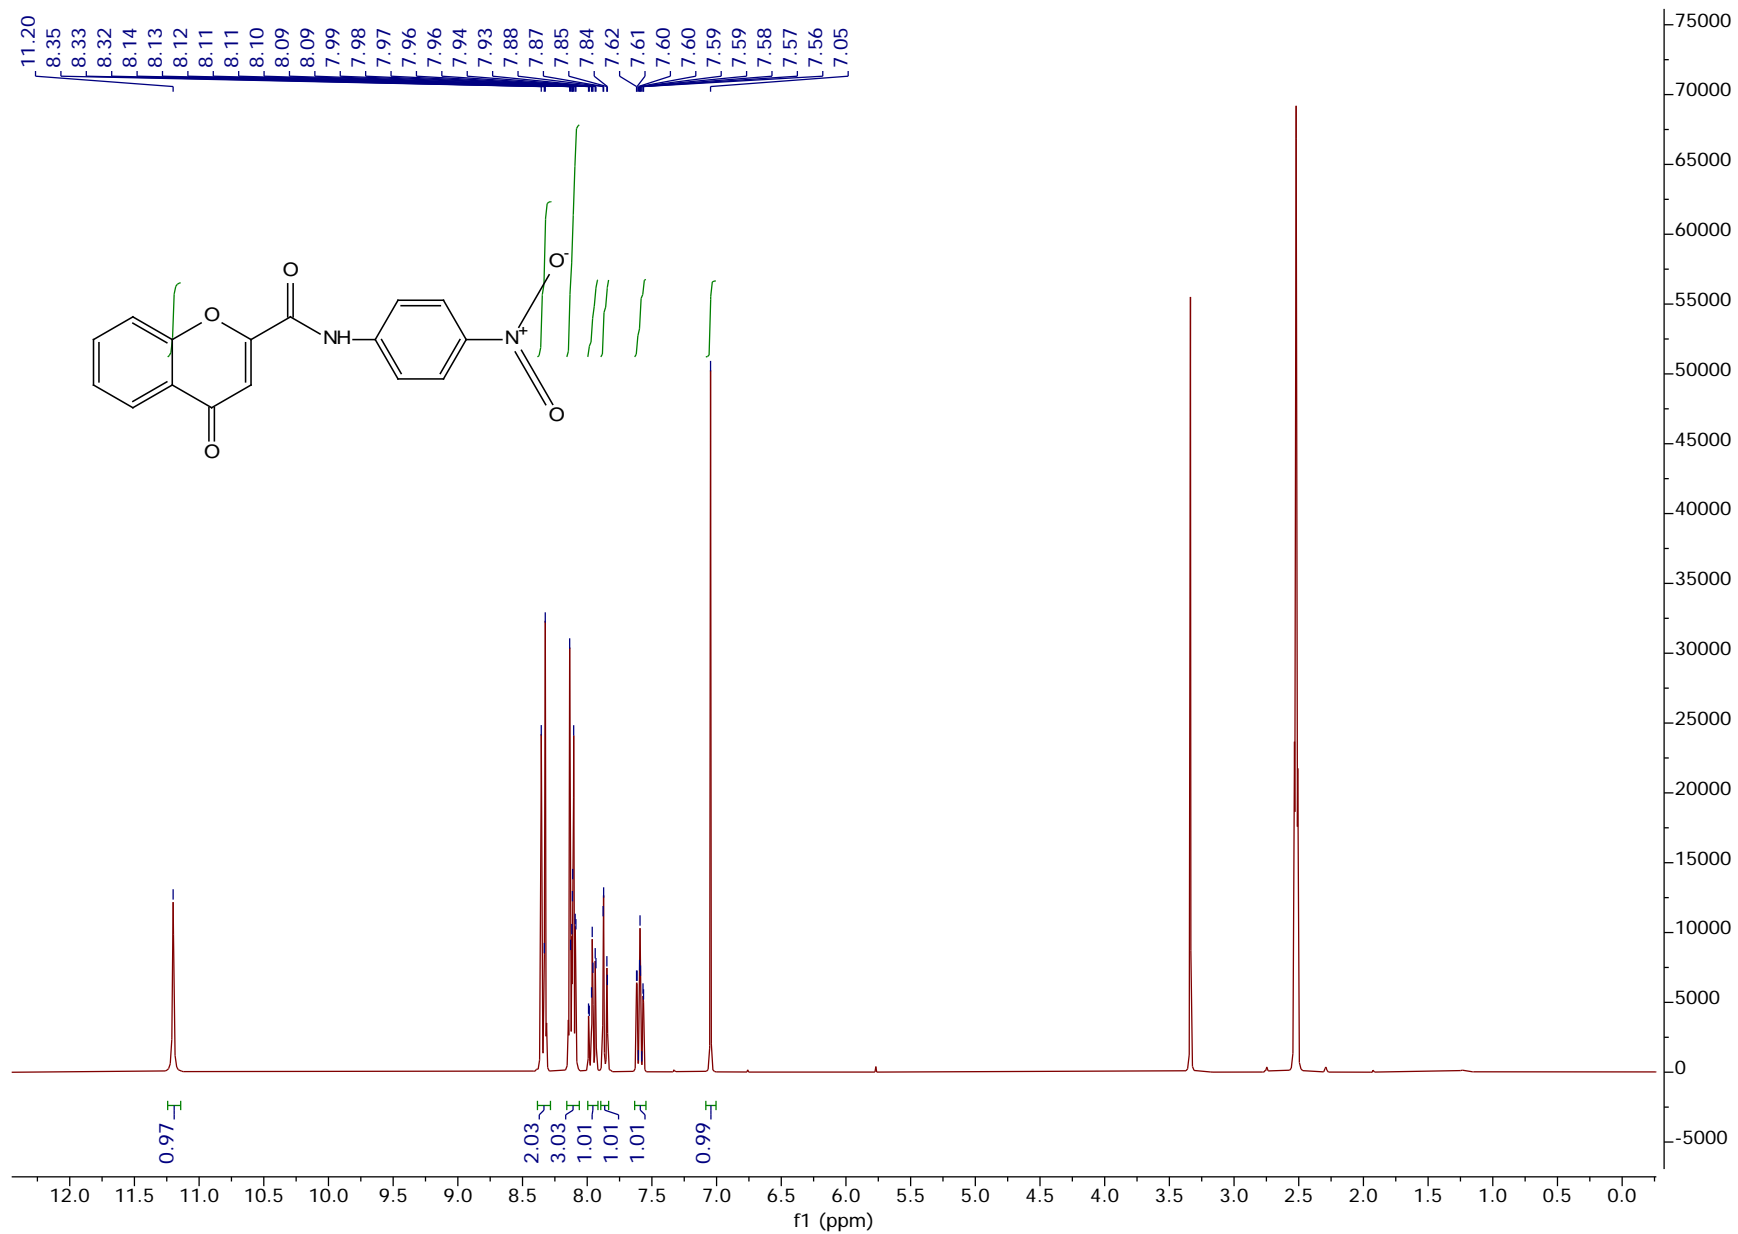

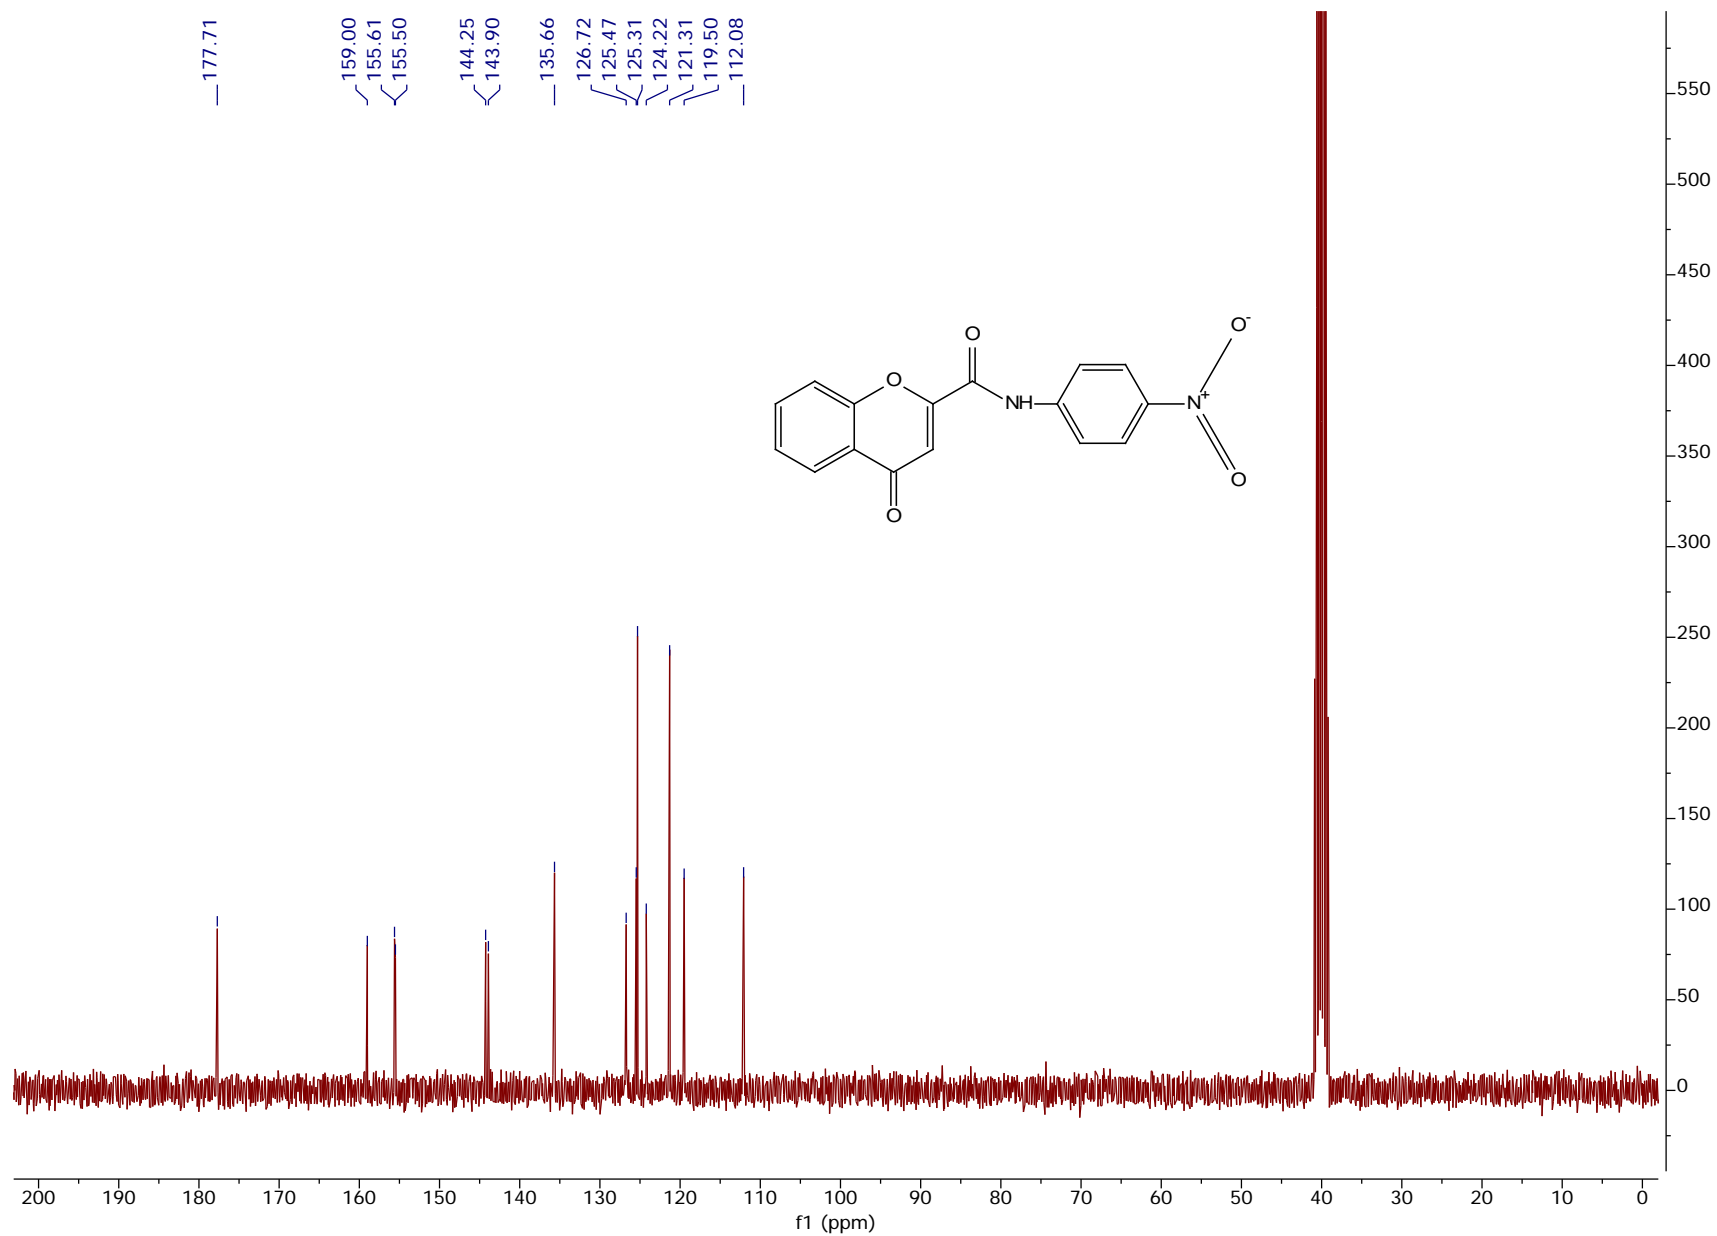



***N*-(3,5-Dinitrophenyl)-4-oxo-4*H*-chromene-2-carboxamide (3o)**

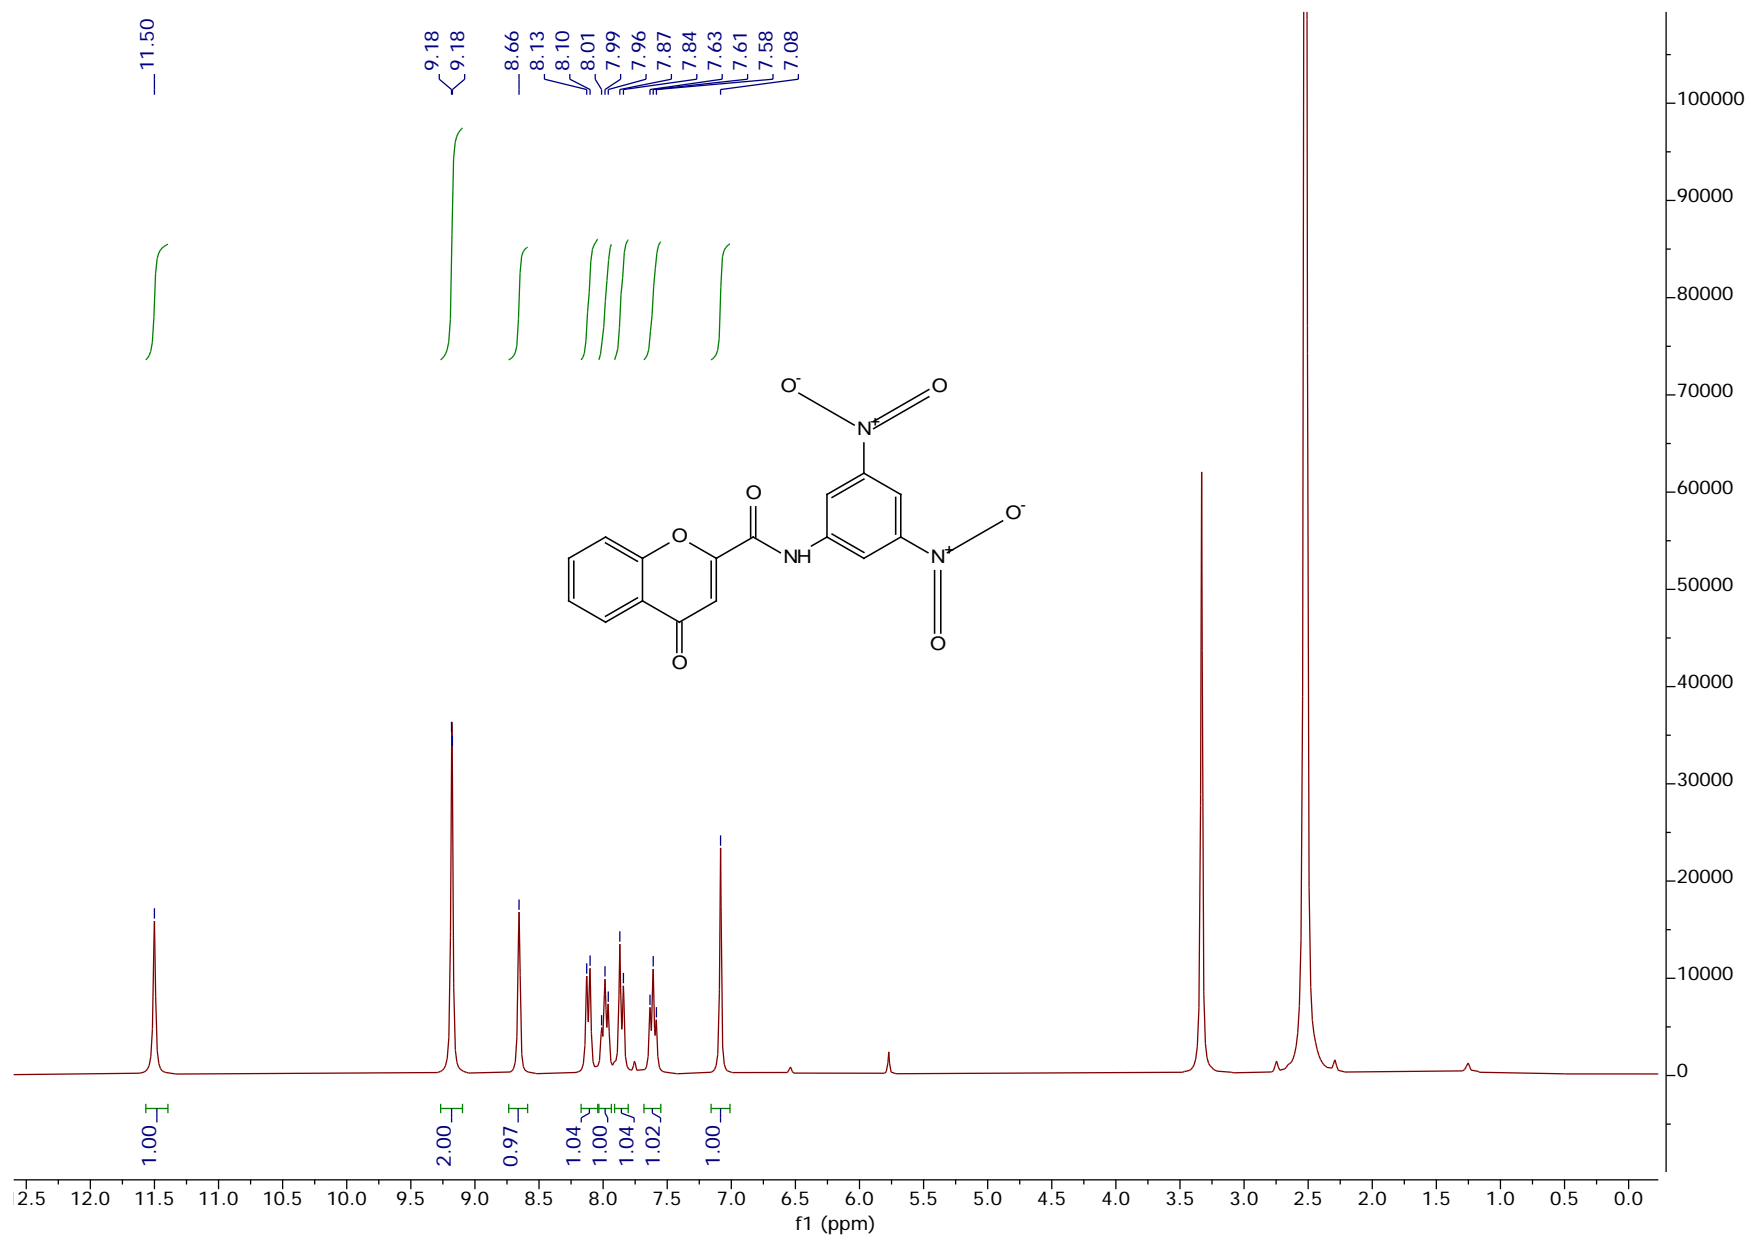

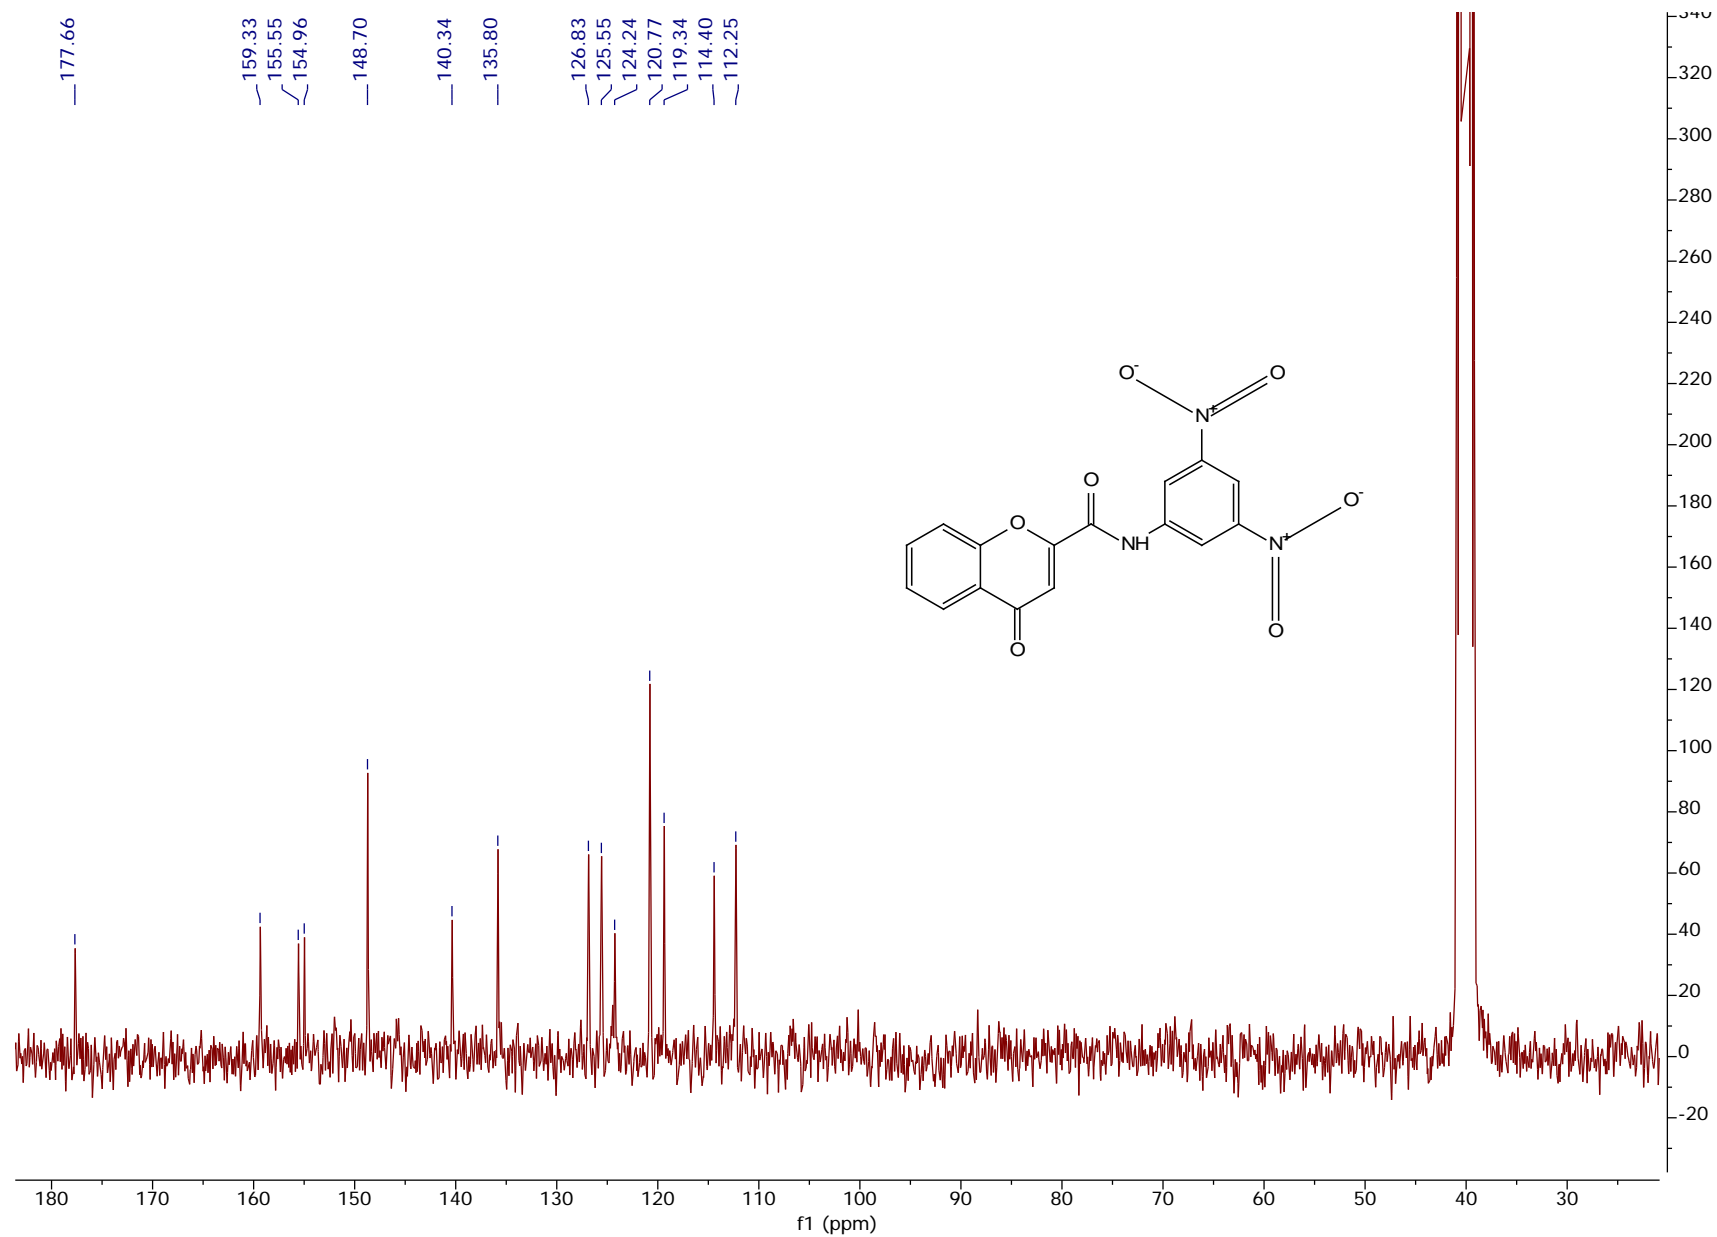

***N*-(4-Methoxyphenyl)-4-oxo-4*H*-chromene-2-carboxamide (3p)**

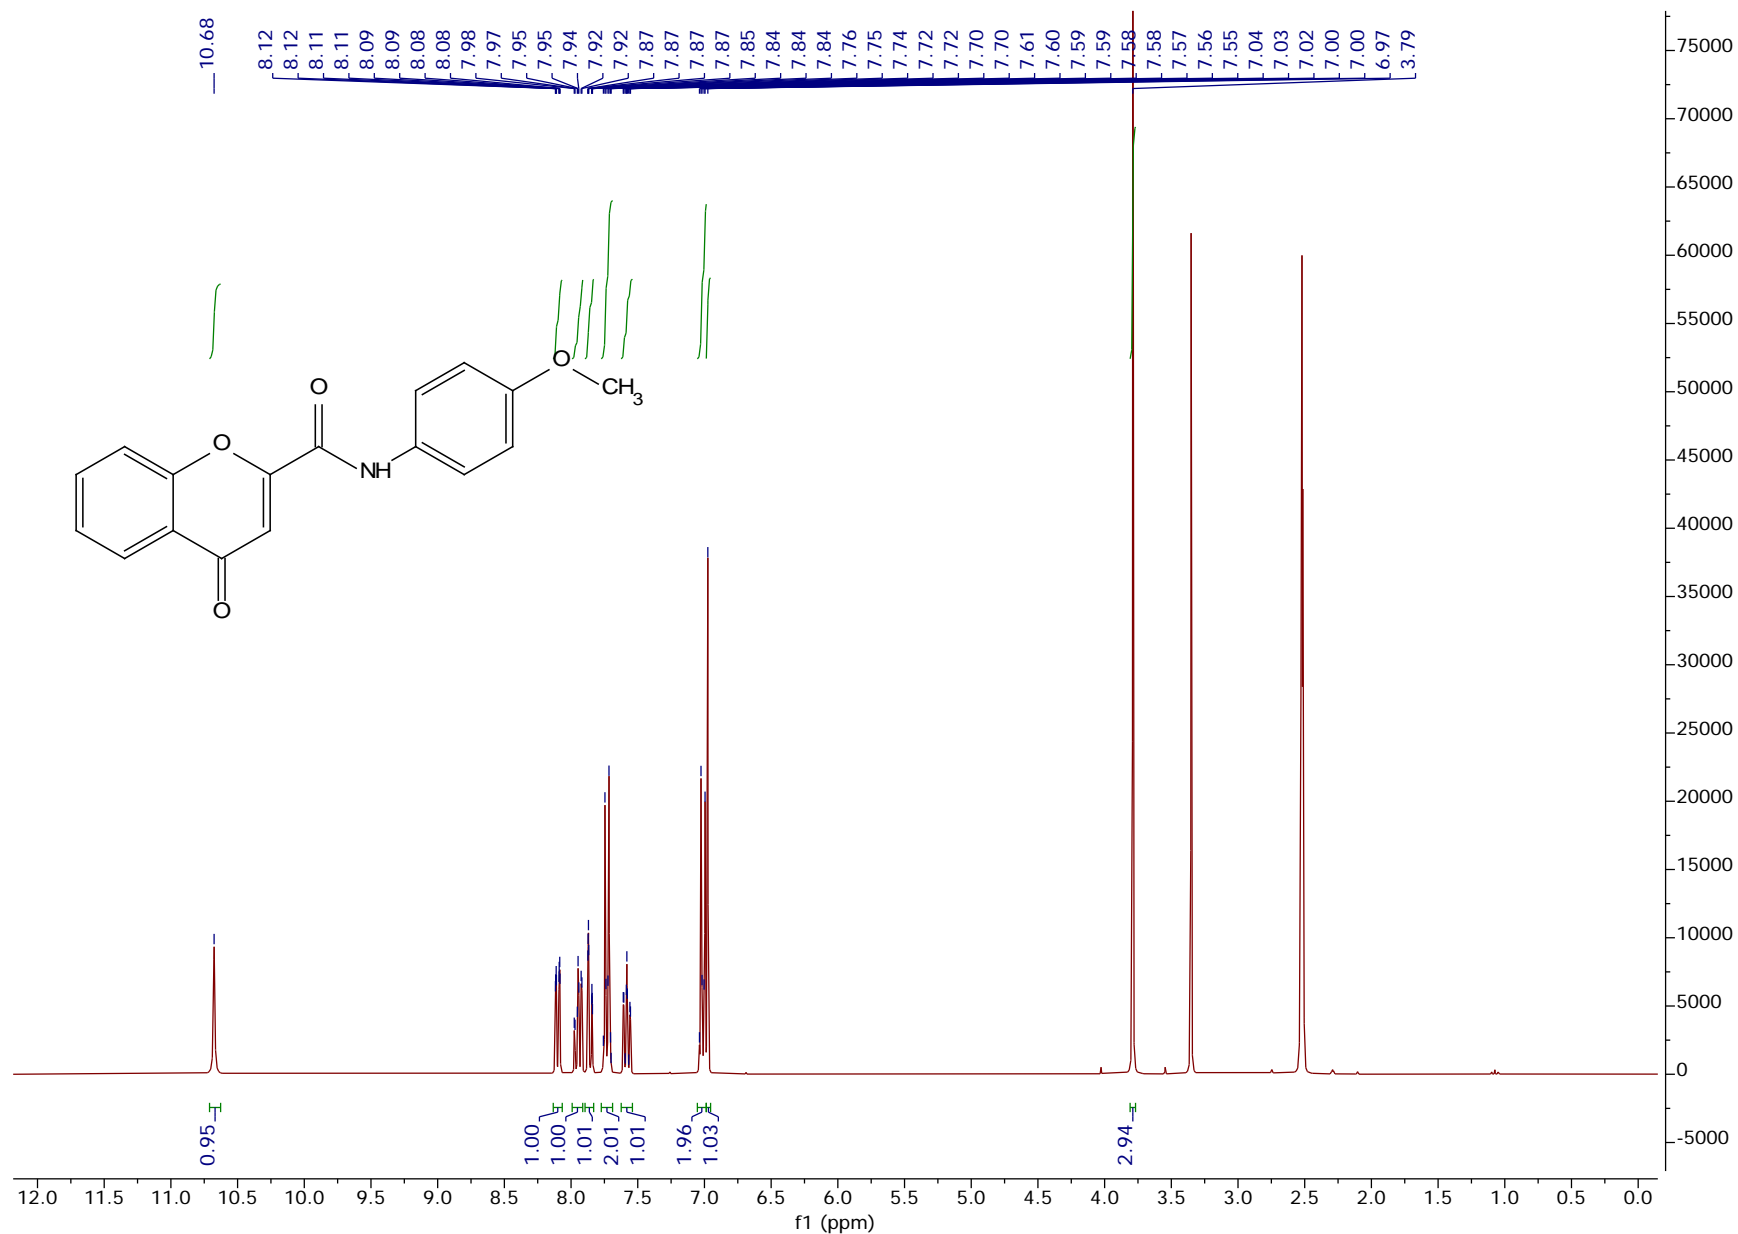

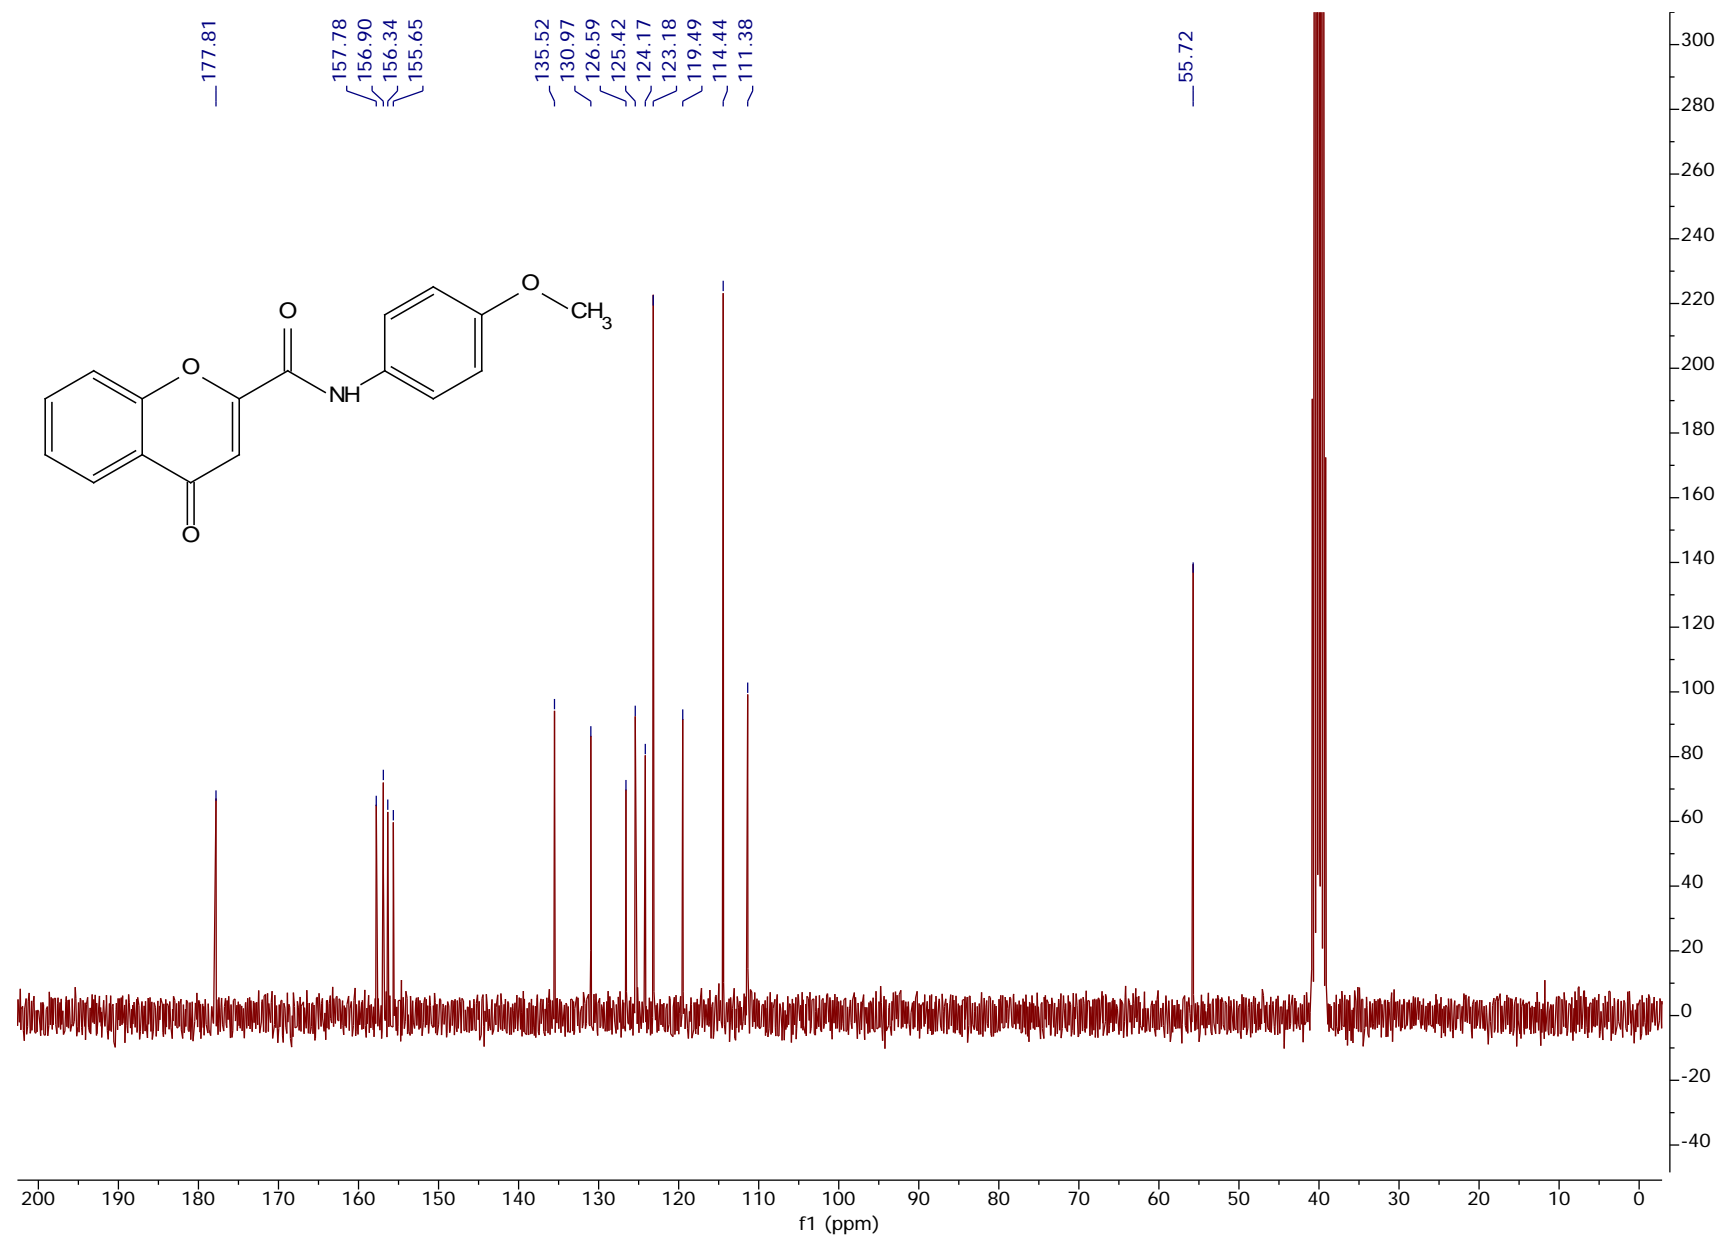

***N*-(2-Methoxyphenyl)-4-oxo-4*H*-chromene-2-carboxamide (3q)**

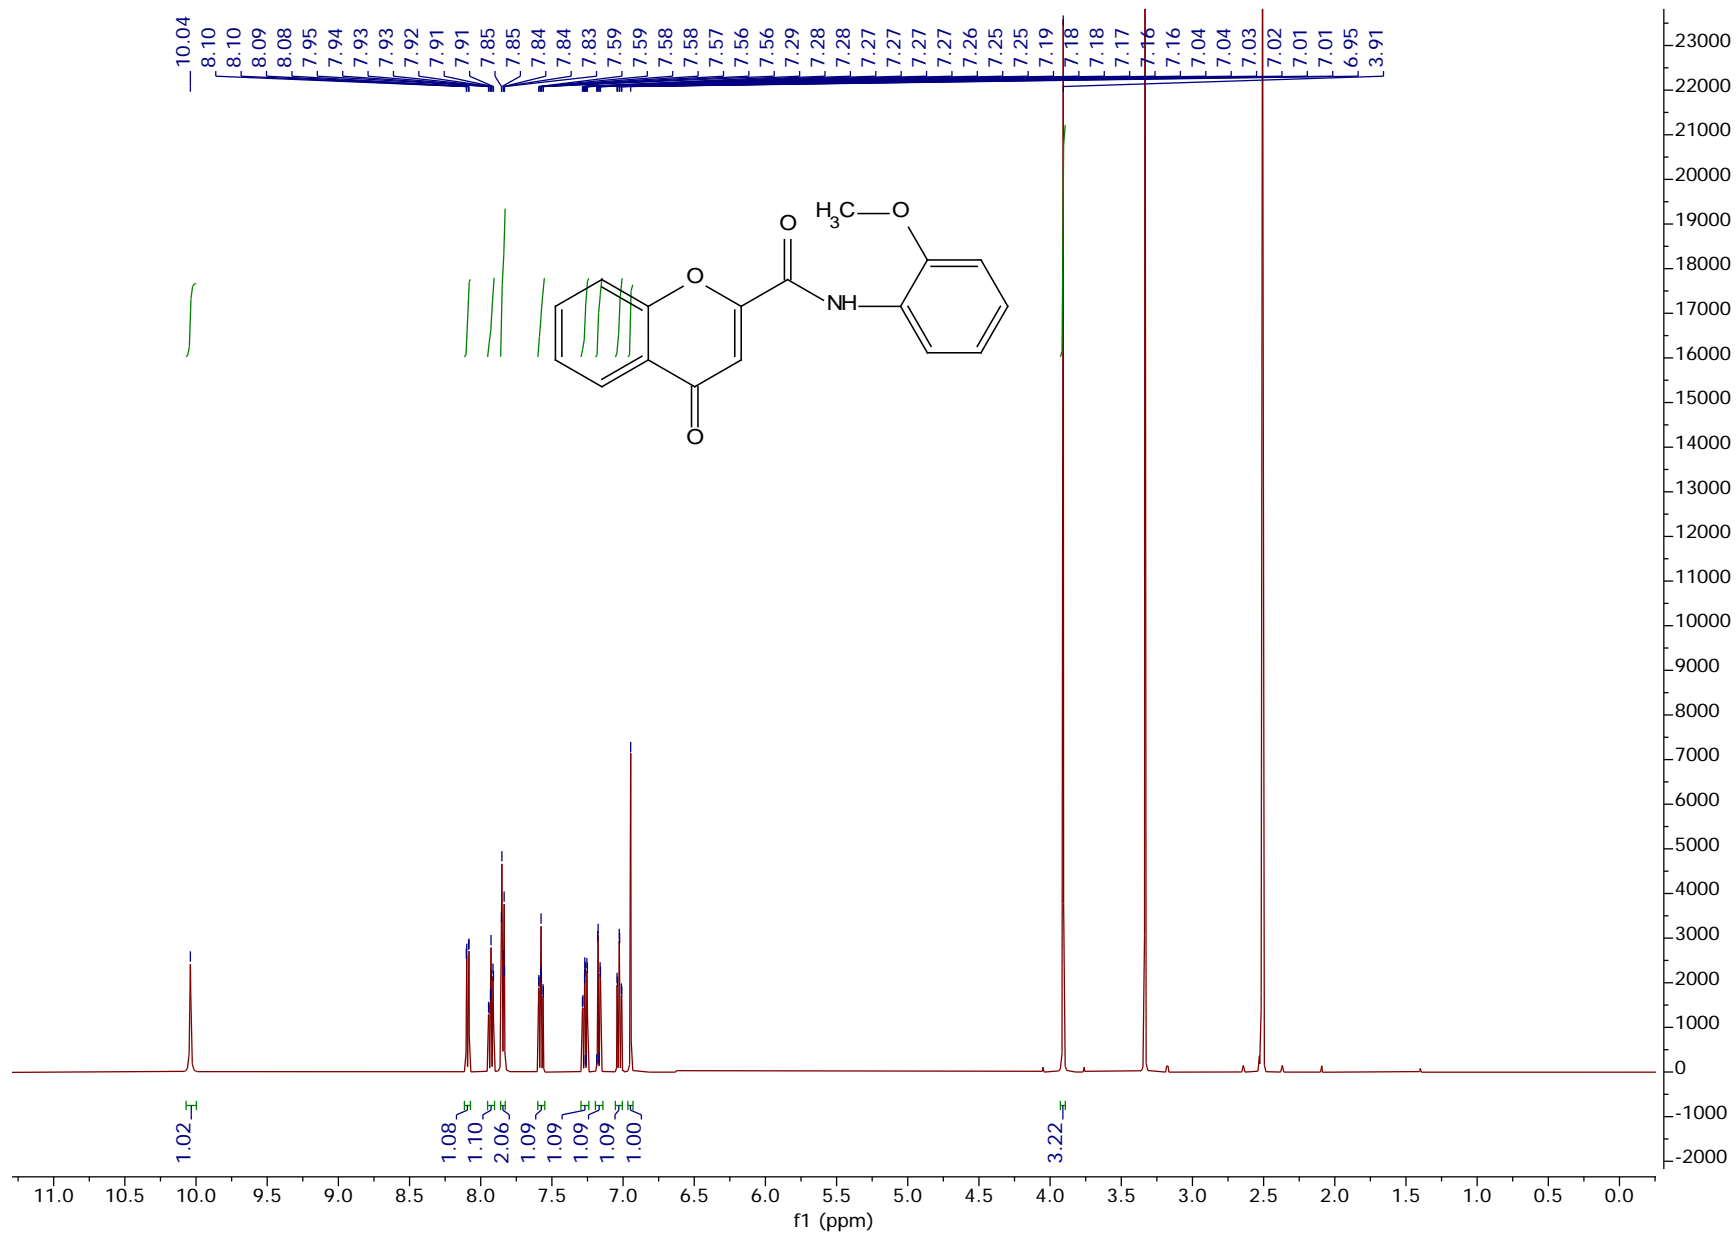

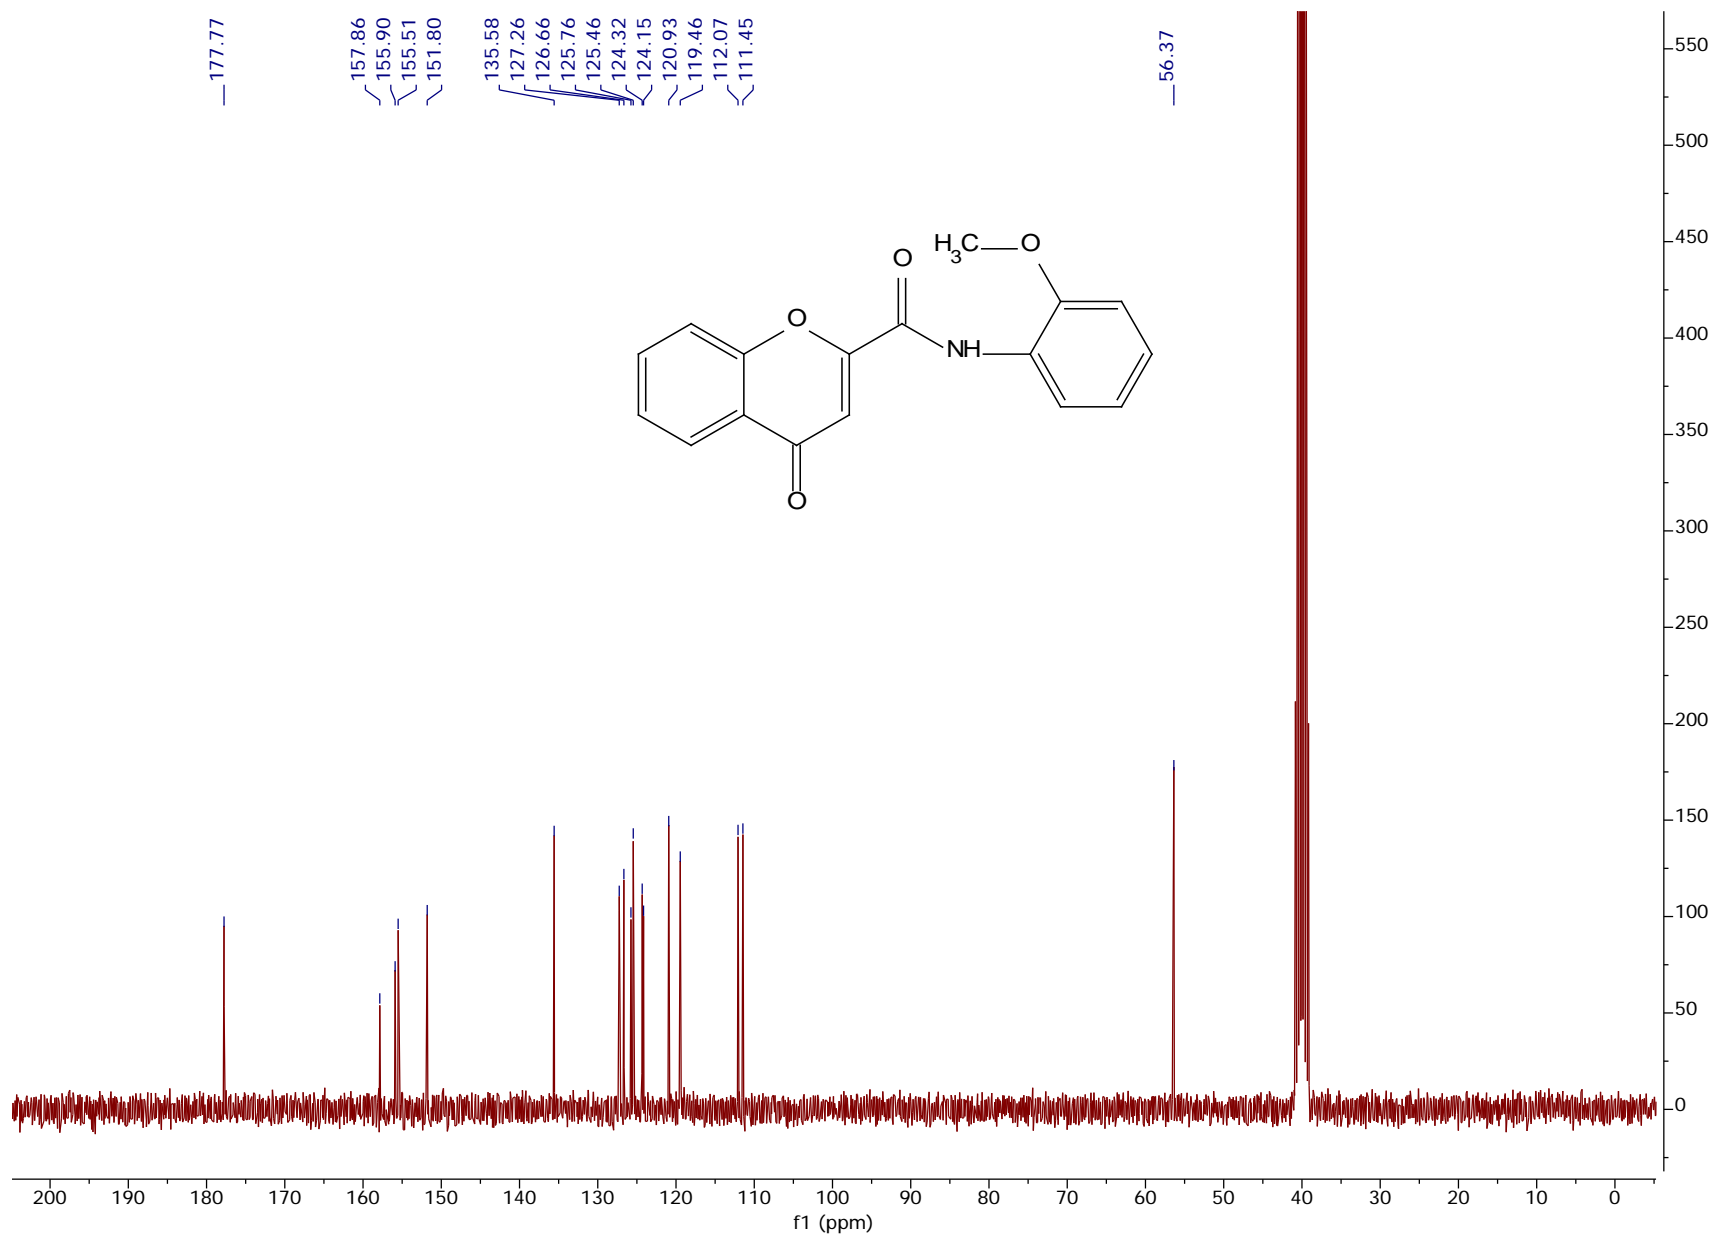

***N*-(2-(Methylthio)phenyl)-4-oxo-4*H*-chromene-2-carboxamide (3r)**

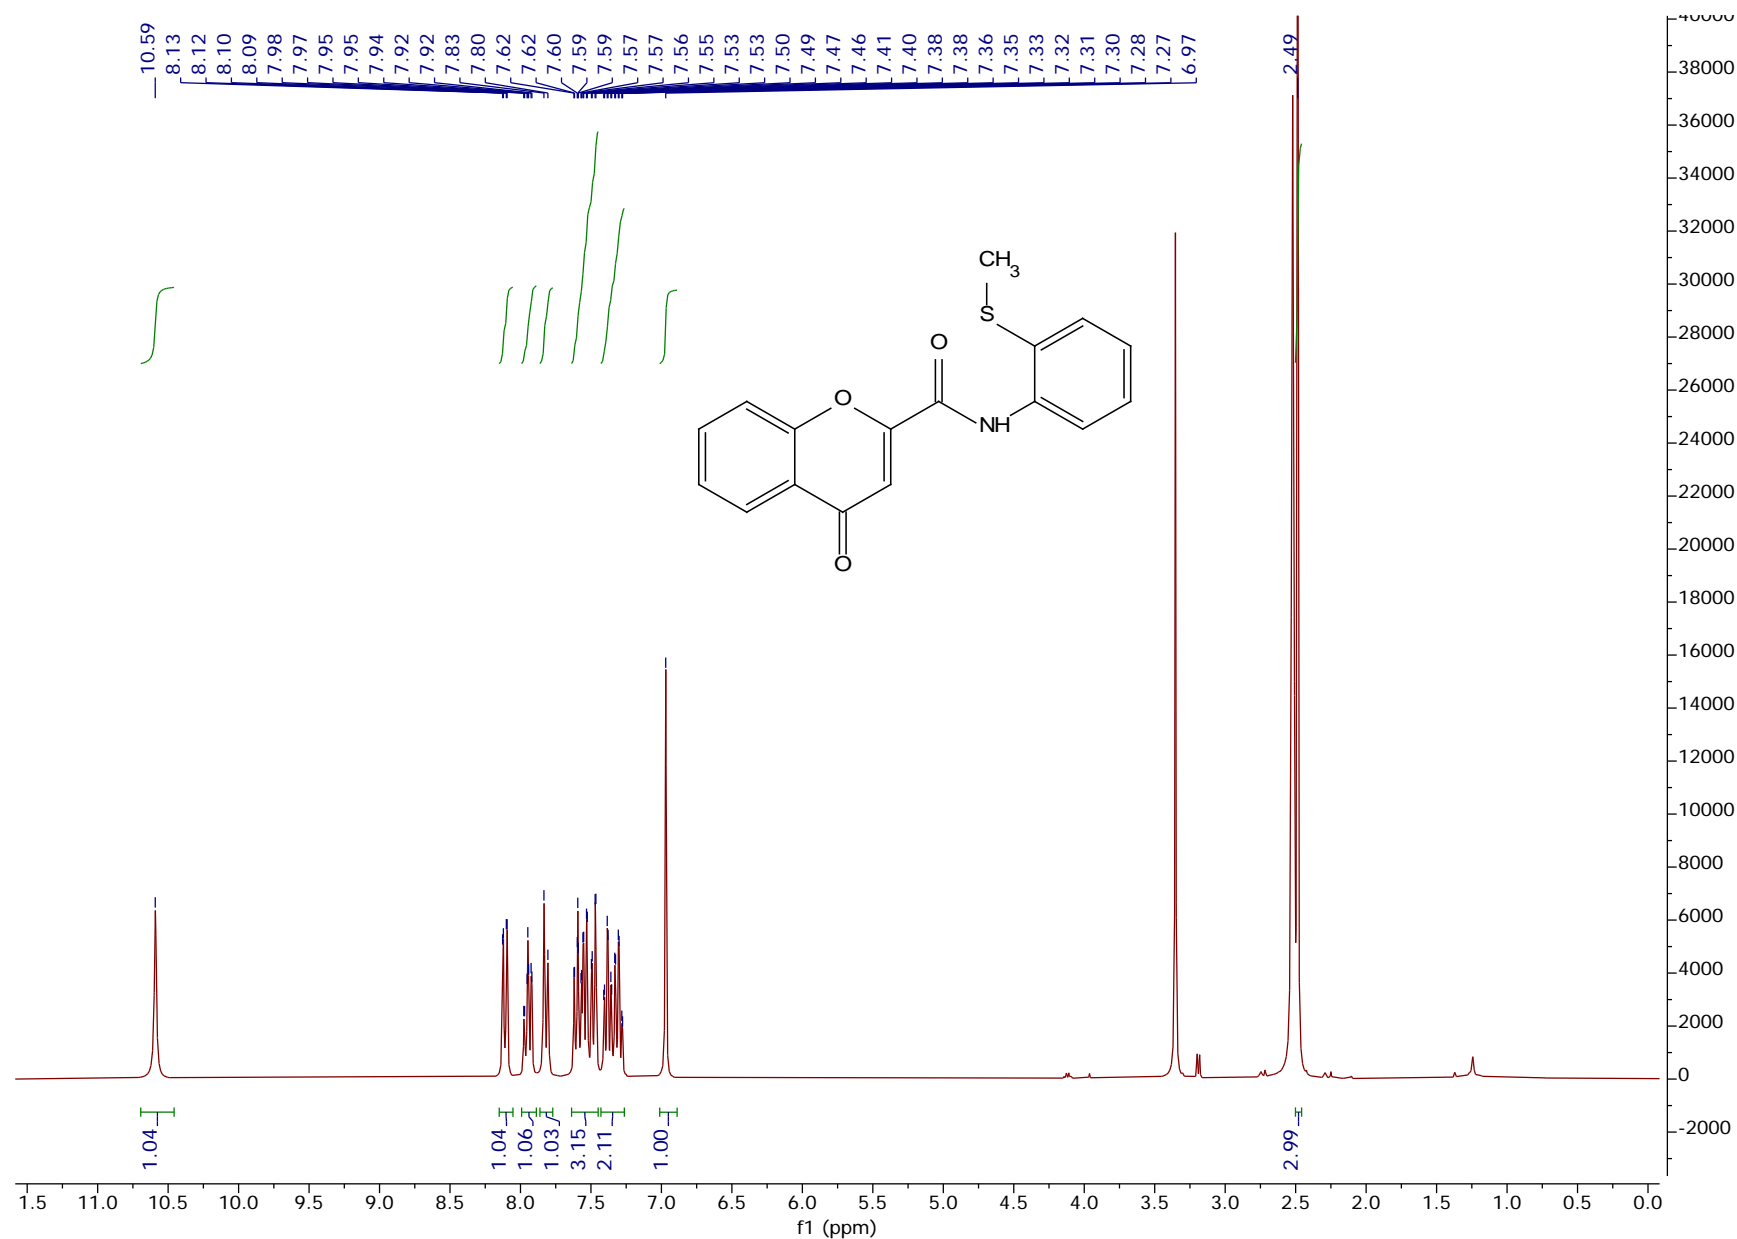

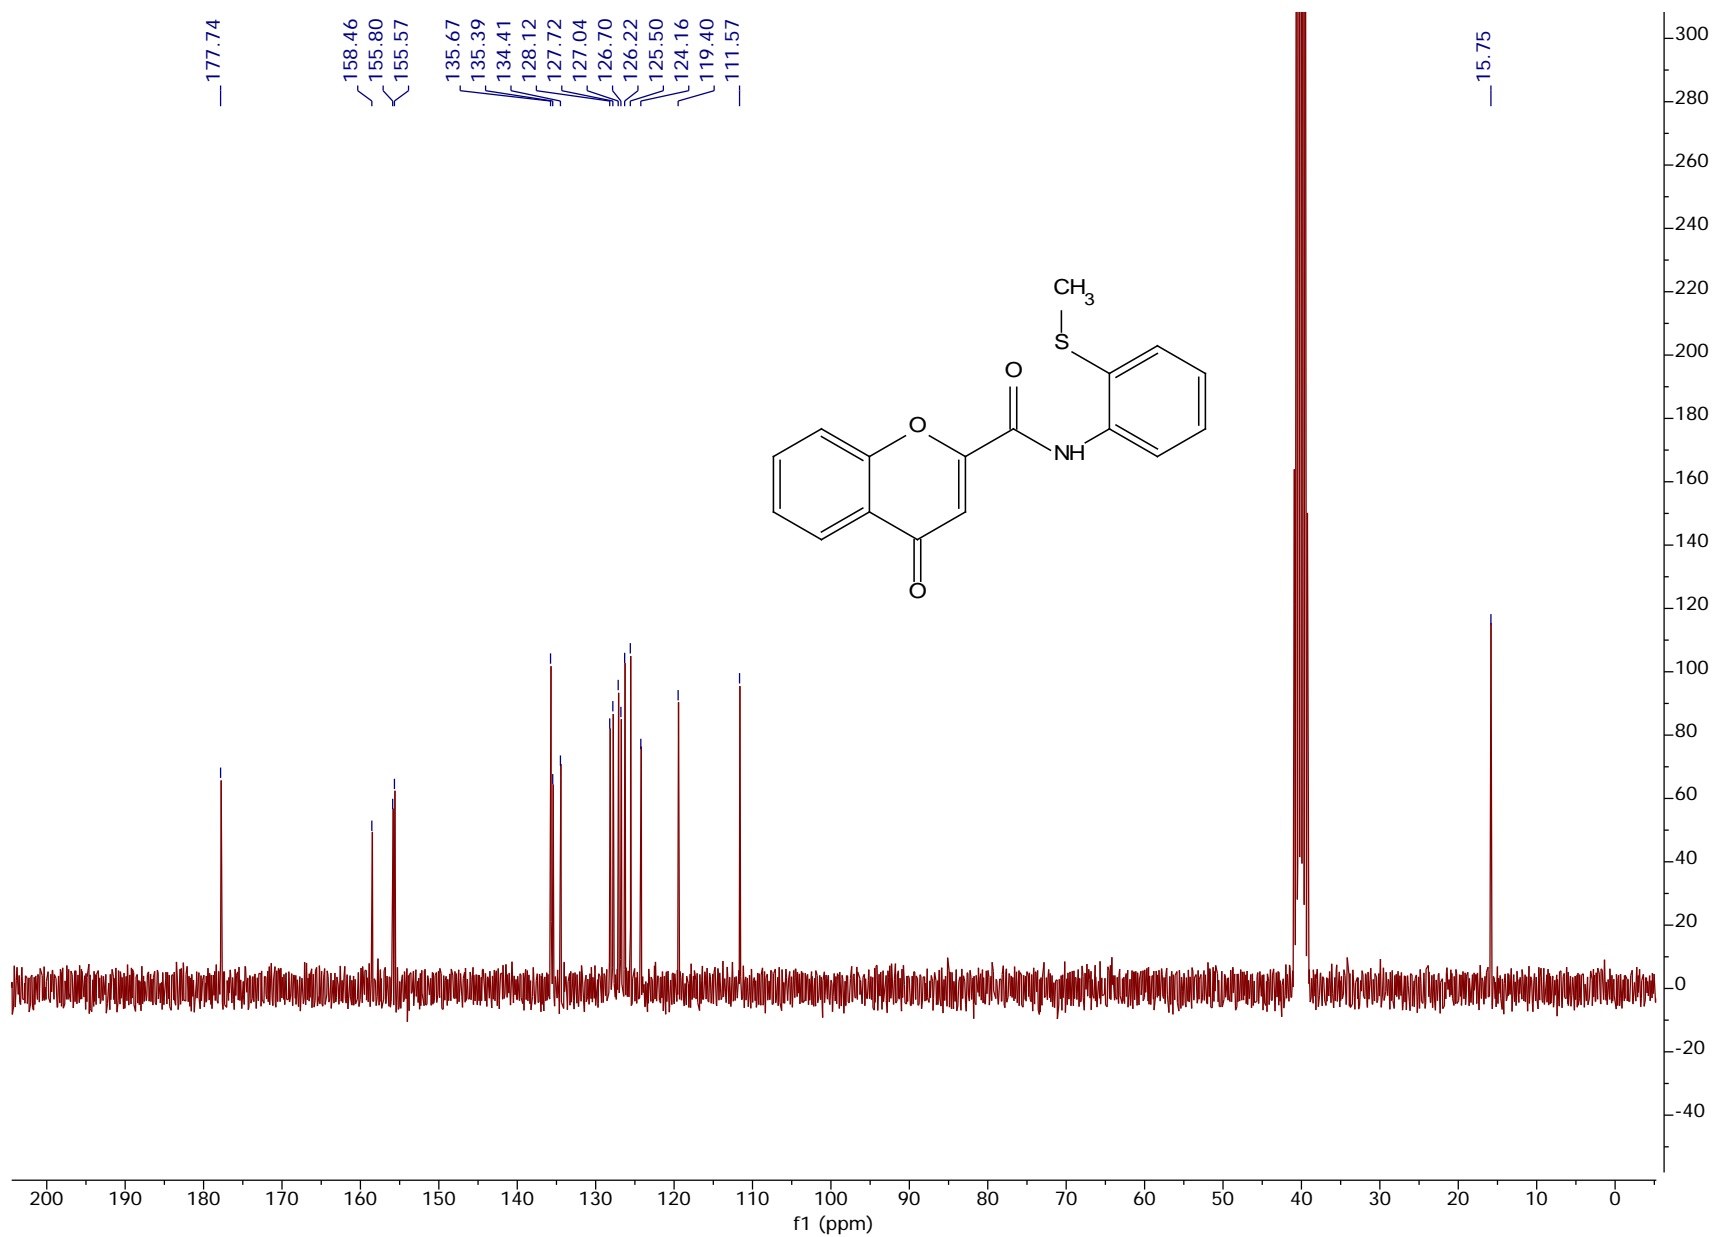



***N*-(3,4-Dimethoxyphenyl)-4-oxo-4*H*-chromene-2-carboxamide (3s)**

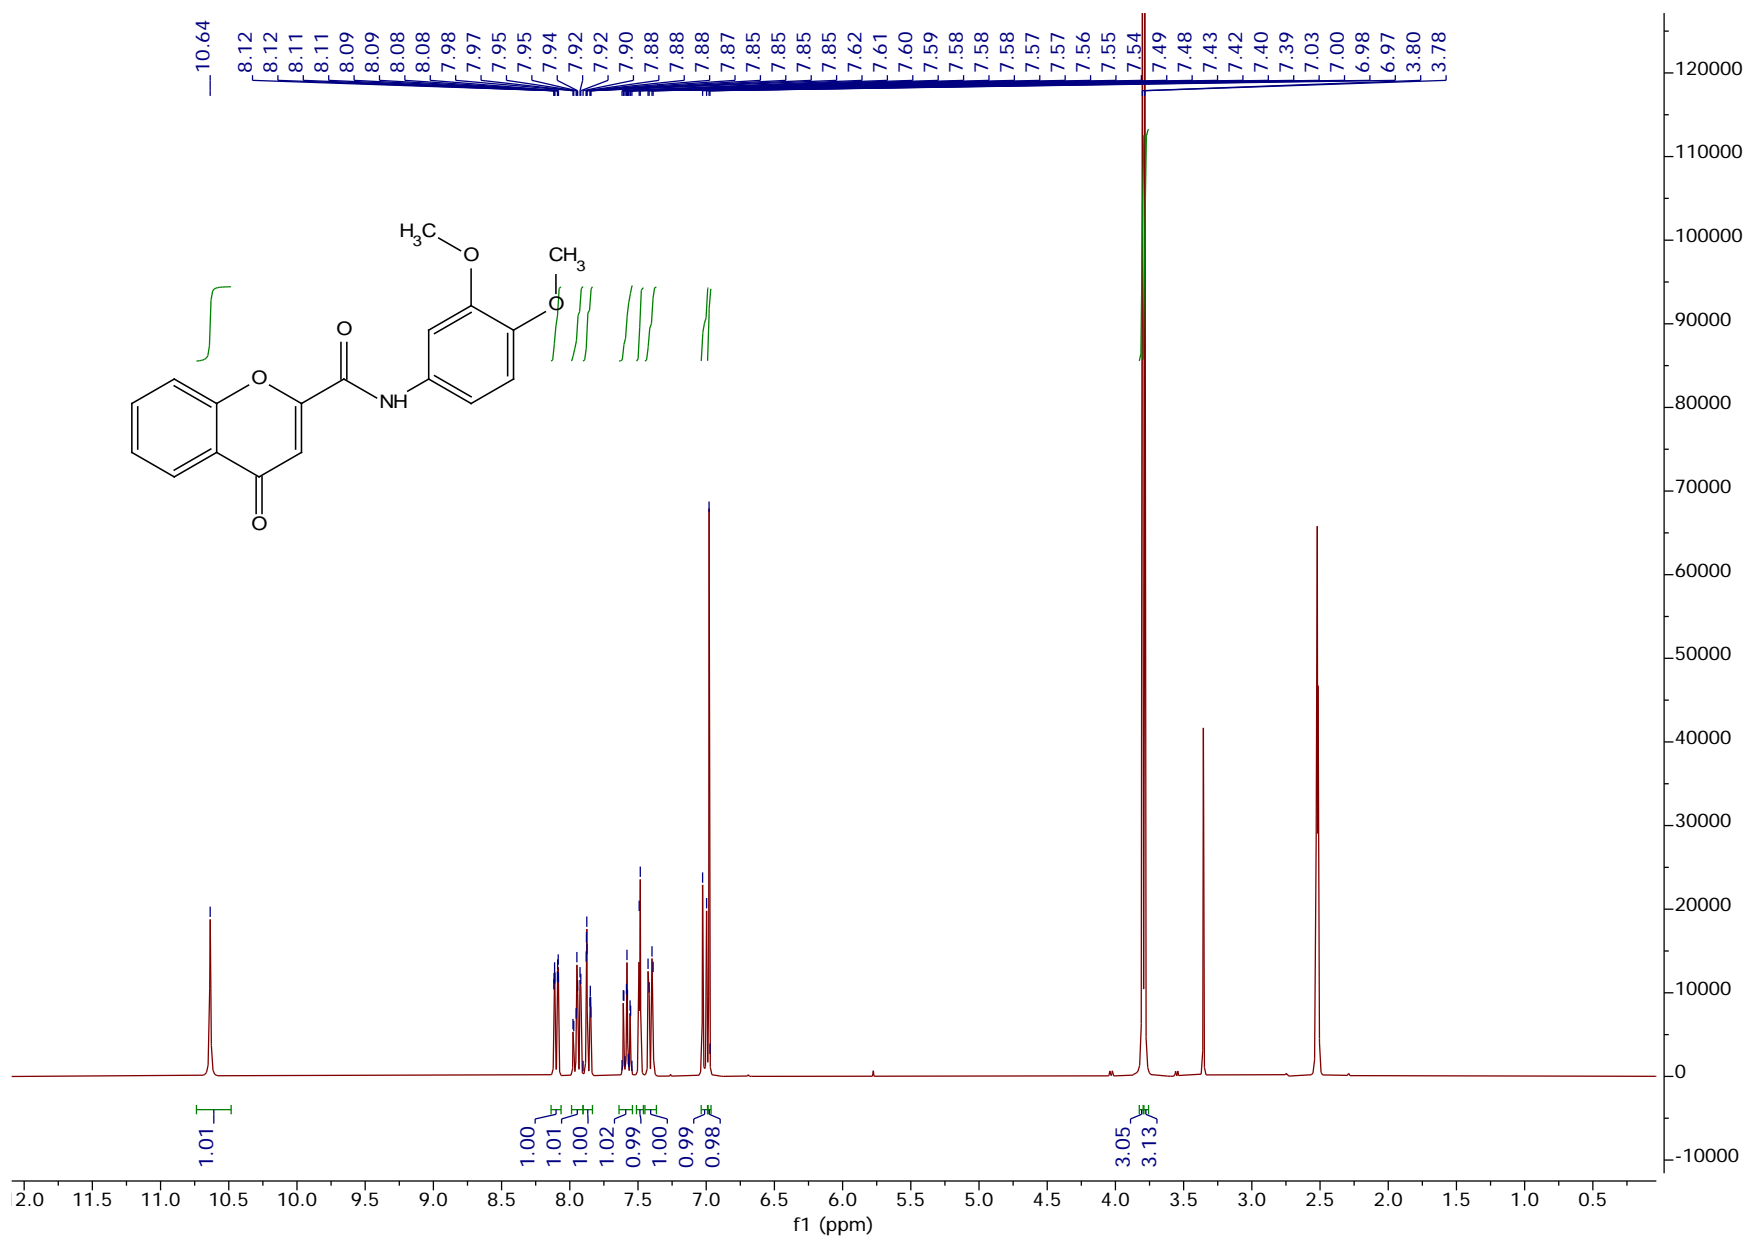

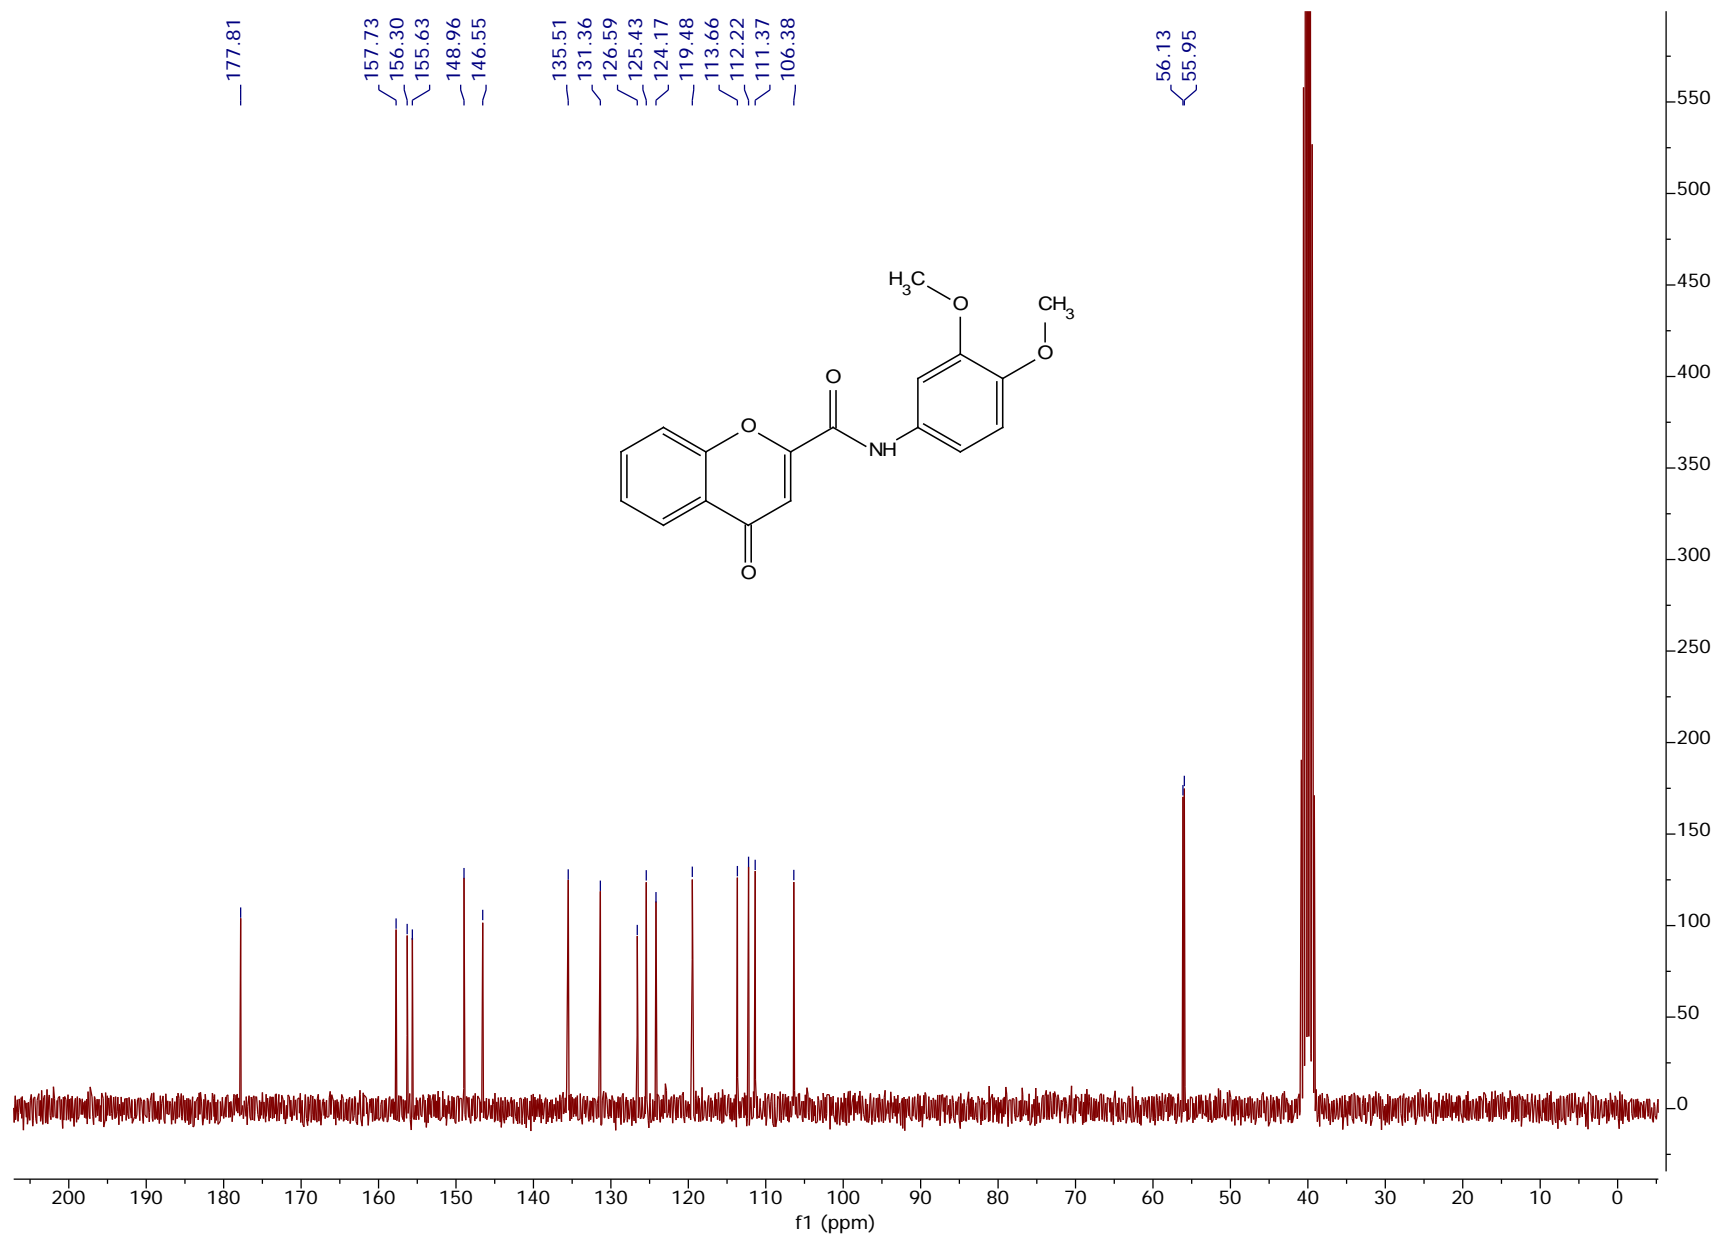

***N*-(3,5-Dimethoxyphenyl)-4-oxo-4*H*-chromene-2-carboxamide (3t)**

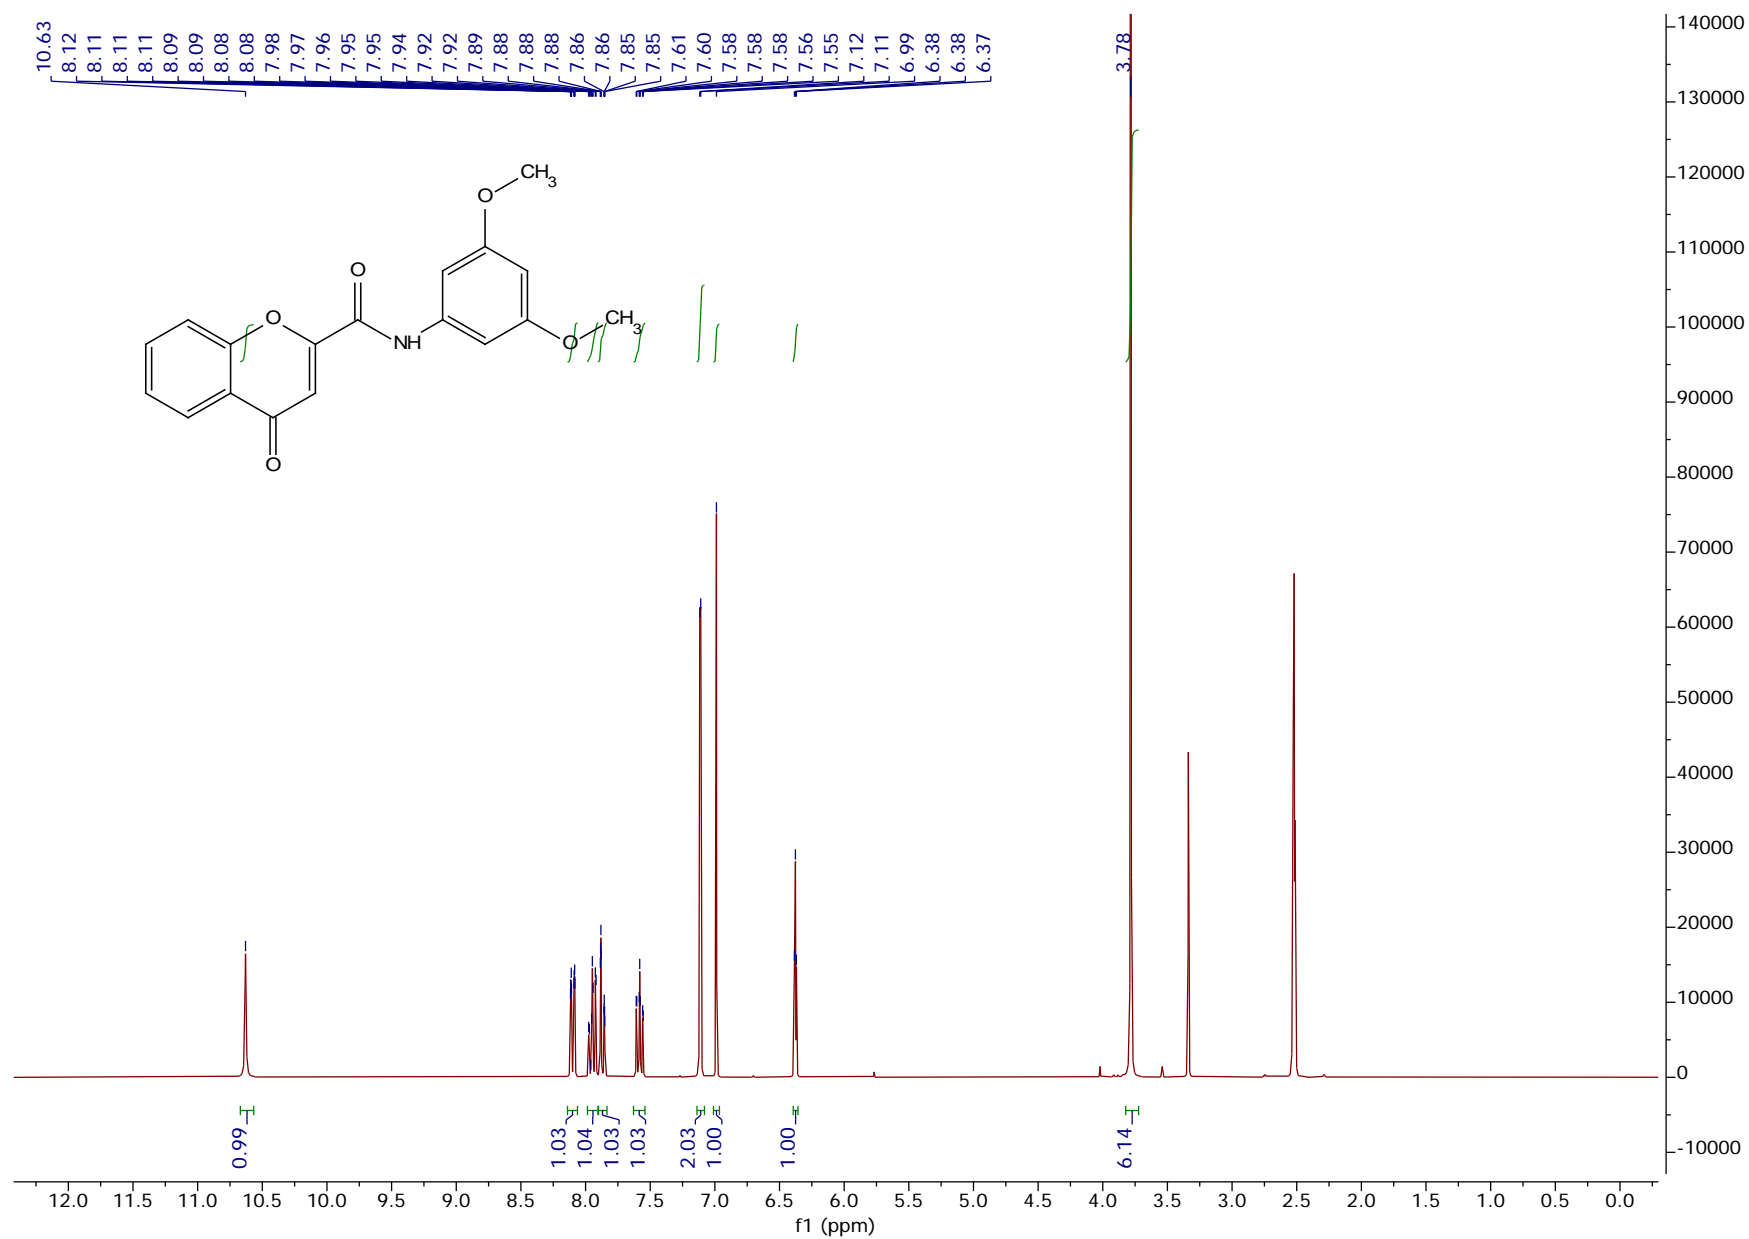

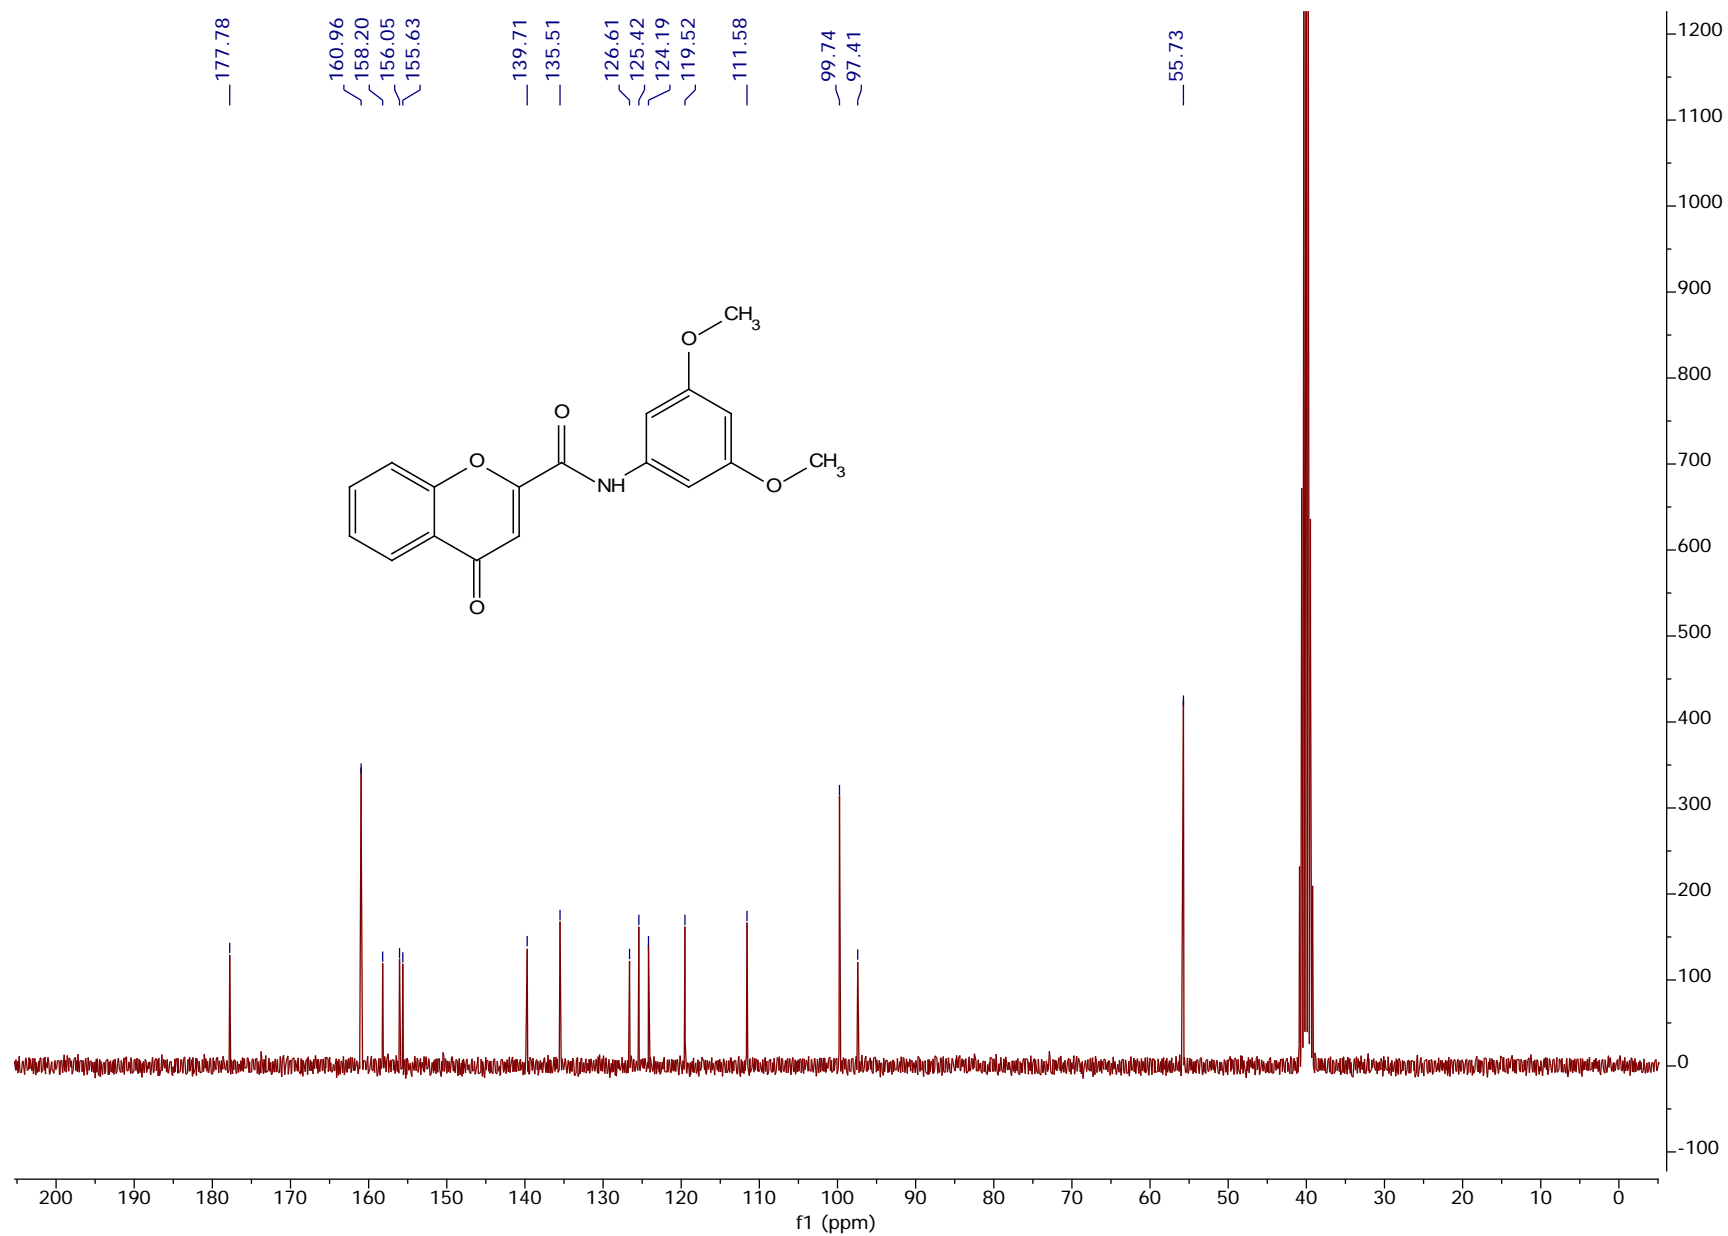

***N*-(4-Morpholinophenyl)-4-oxo-4*H*-chromene-2-carboxamide (3u)**

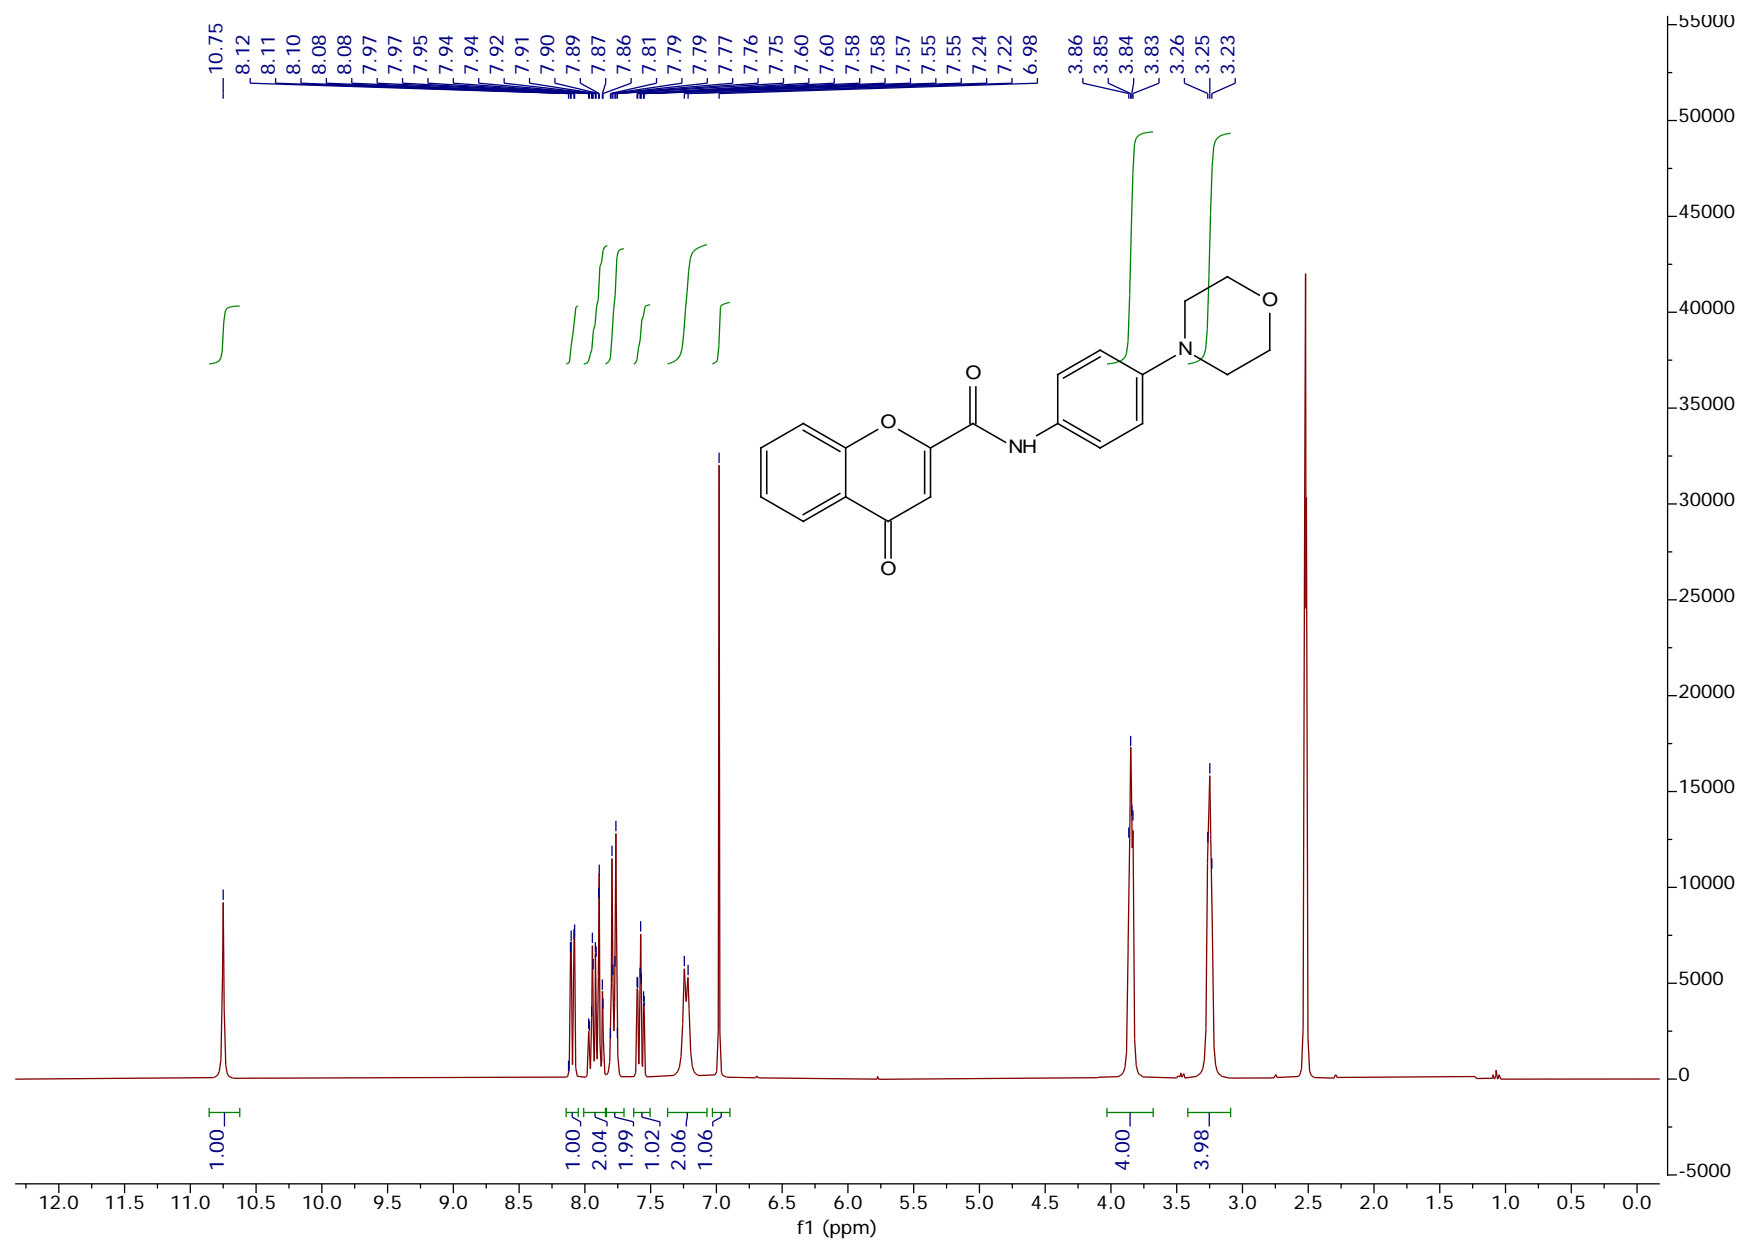

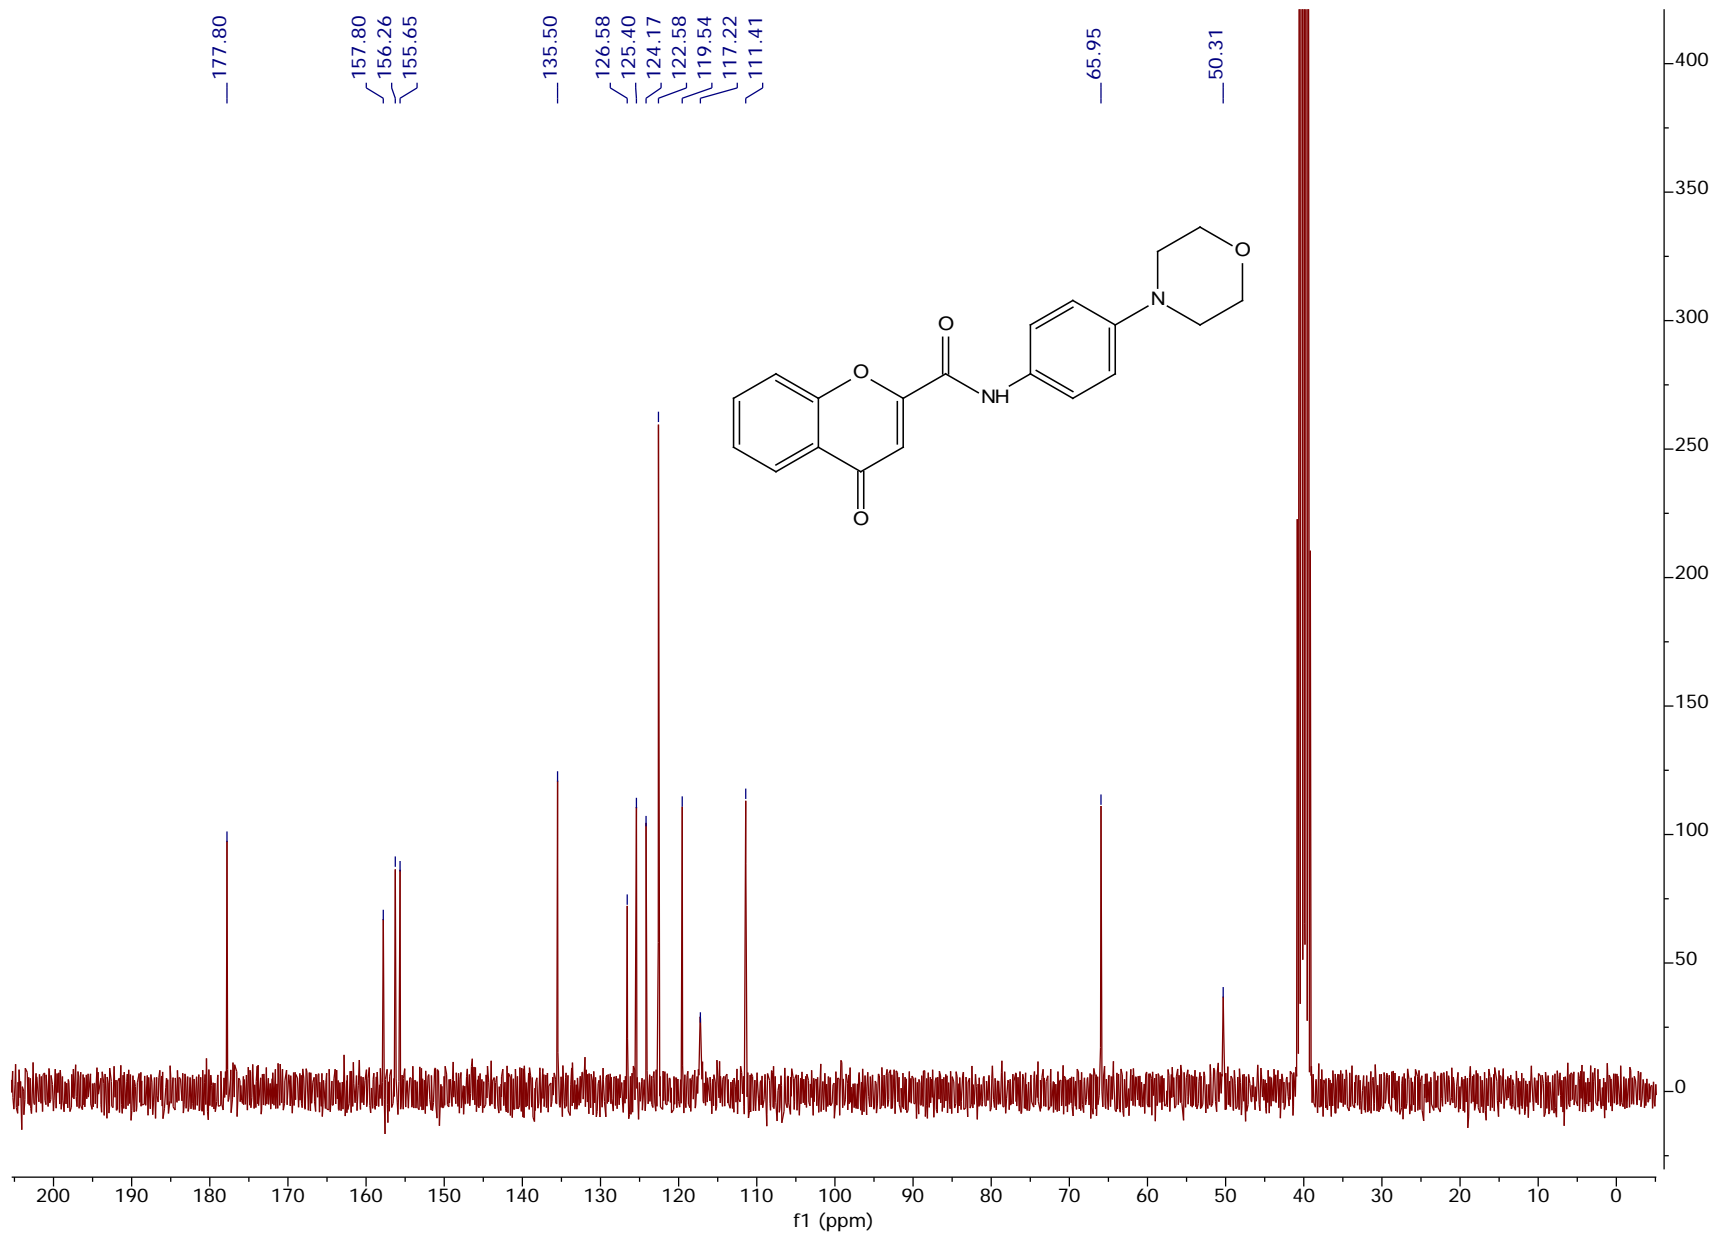

4-Oxo-*N*-(pyrimidin-2-yl)-4*H*-chromene-2-carboxamide (3v)

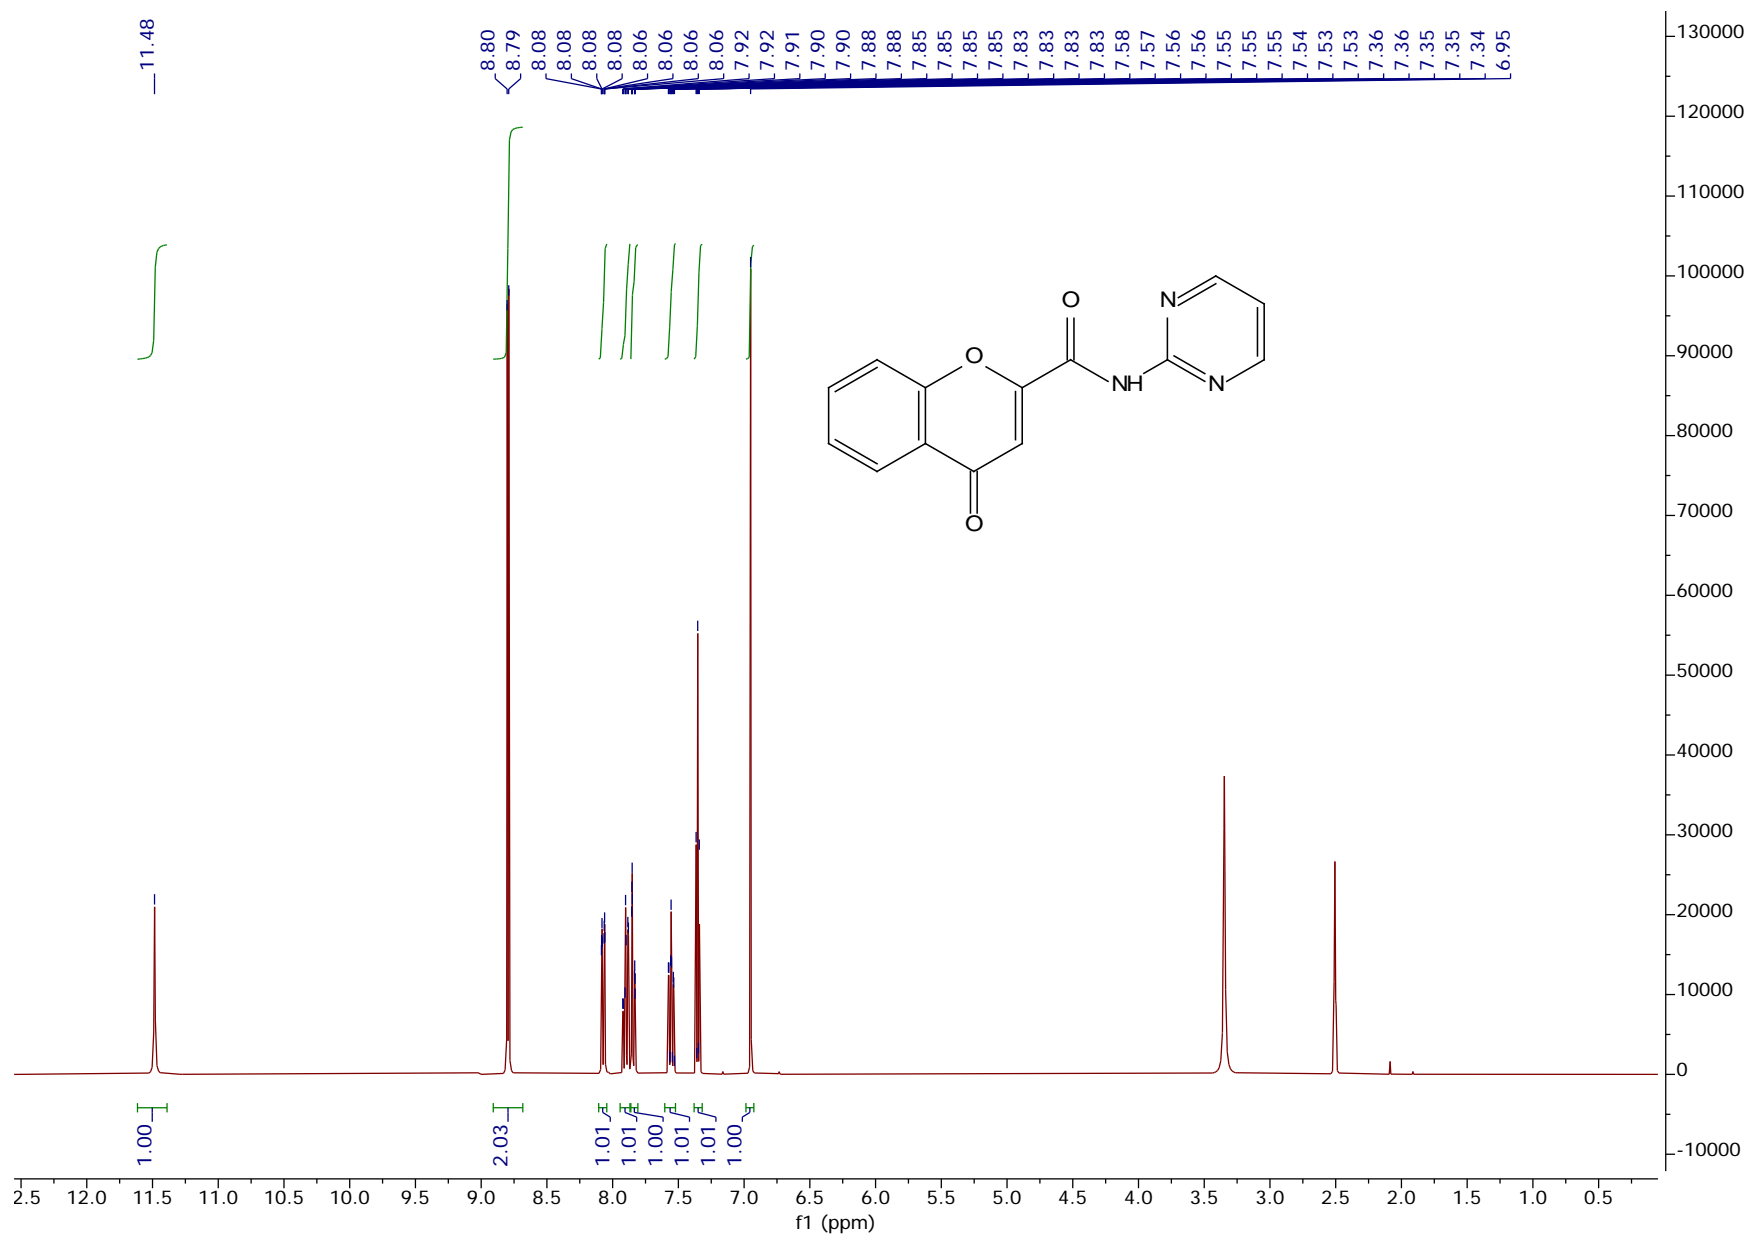

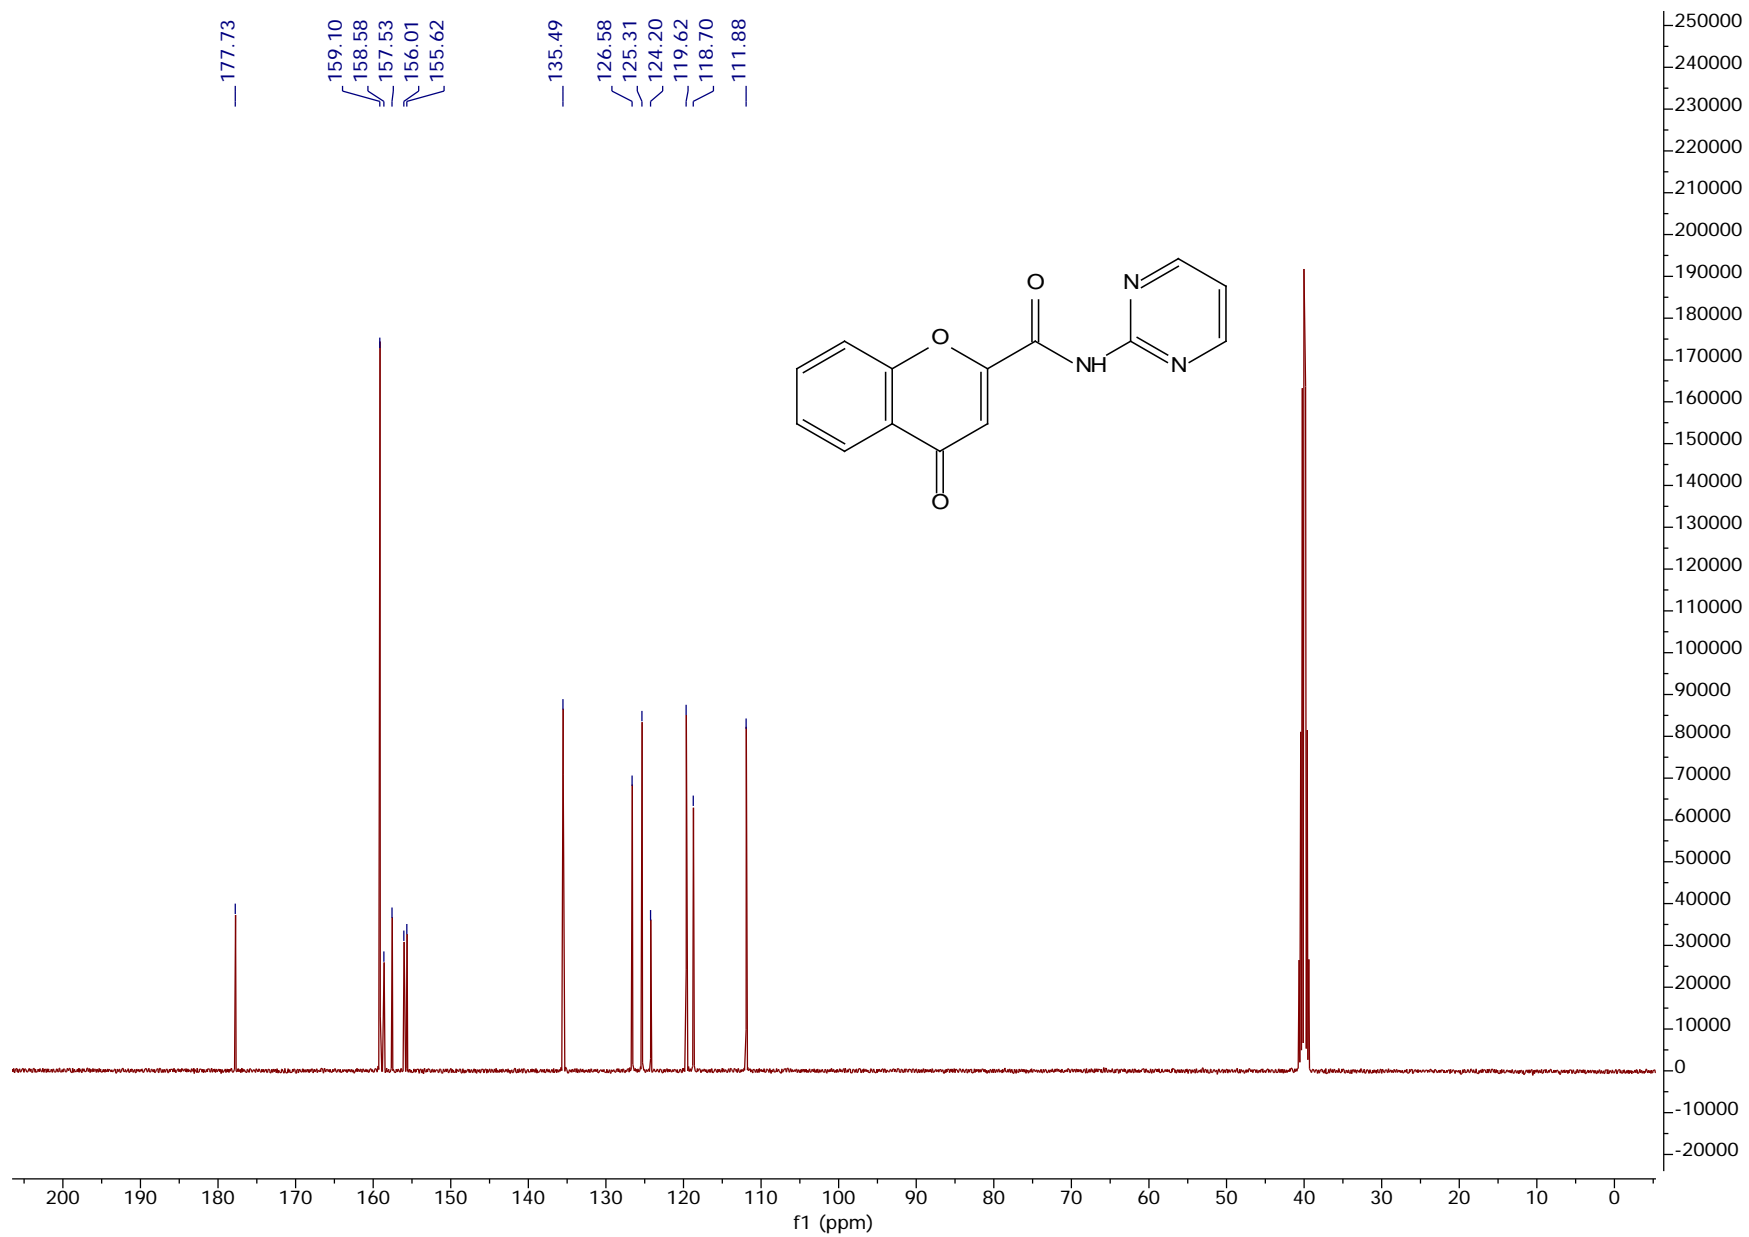



4-Oxo-N-propyl-4H-chromene-2-carboxamide (3w)

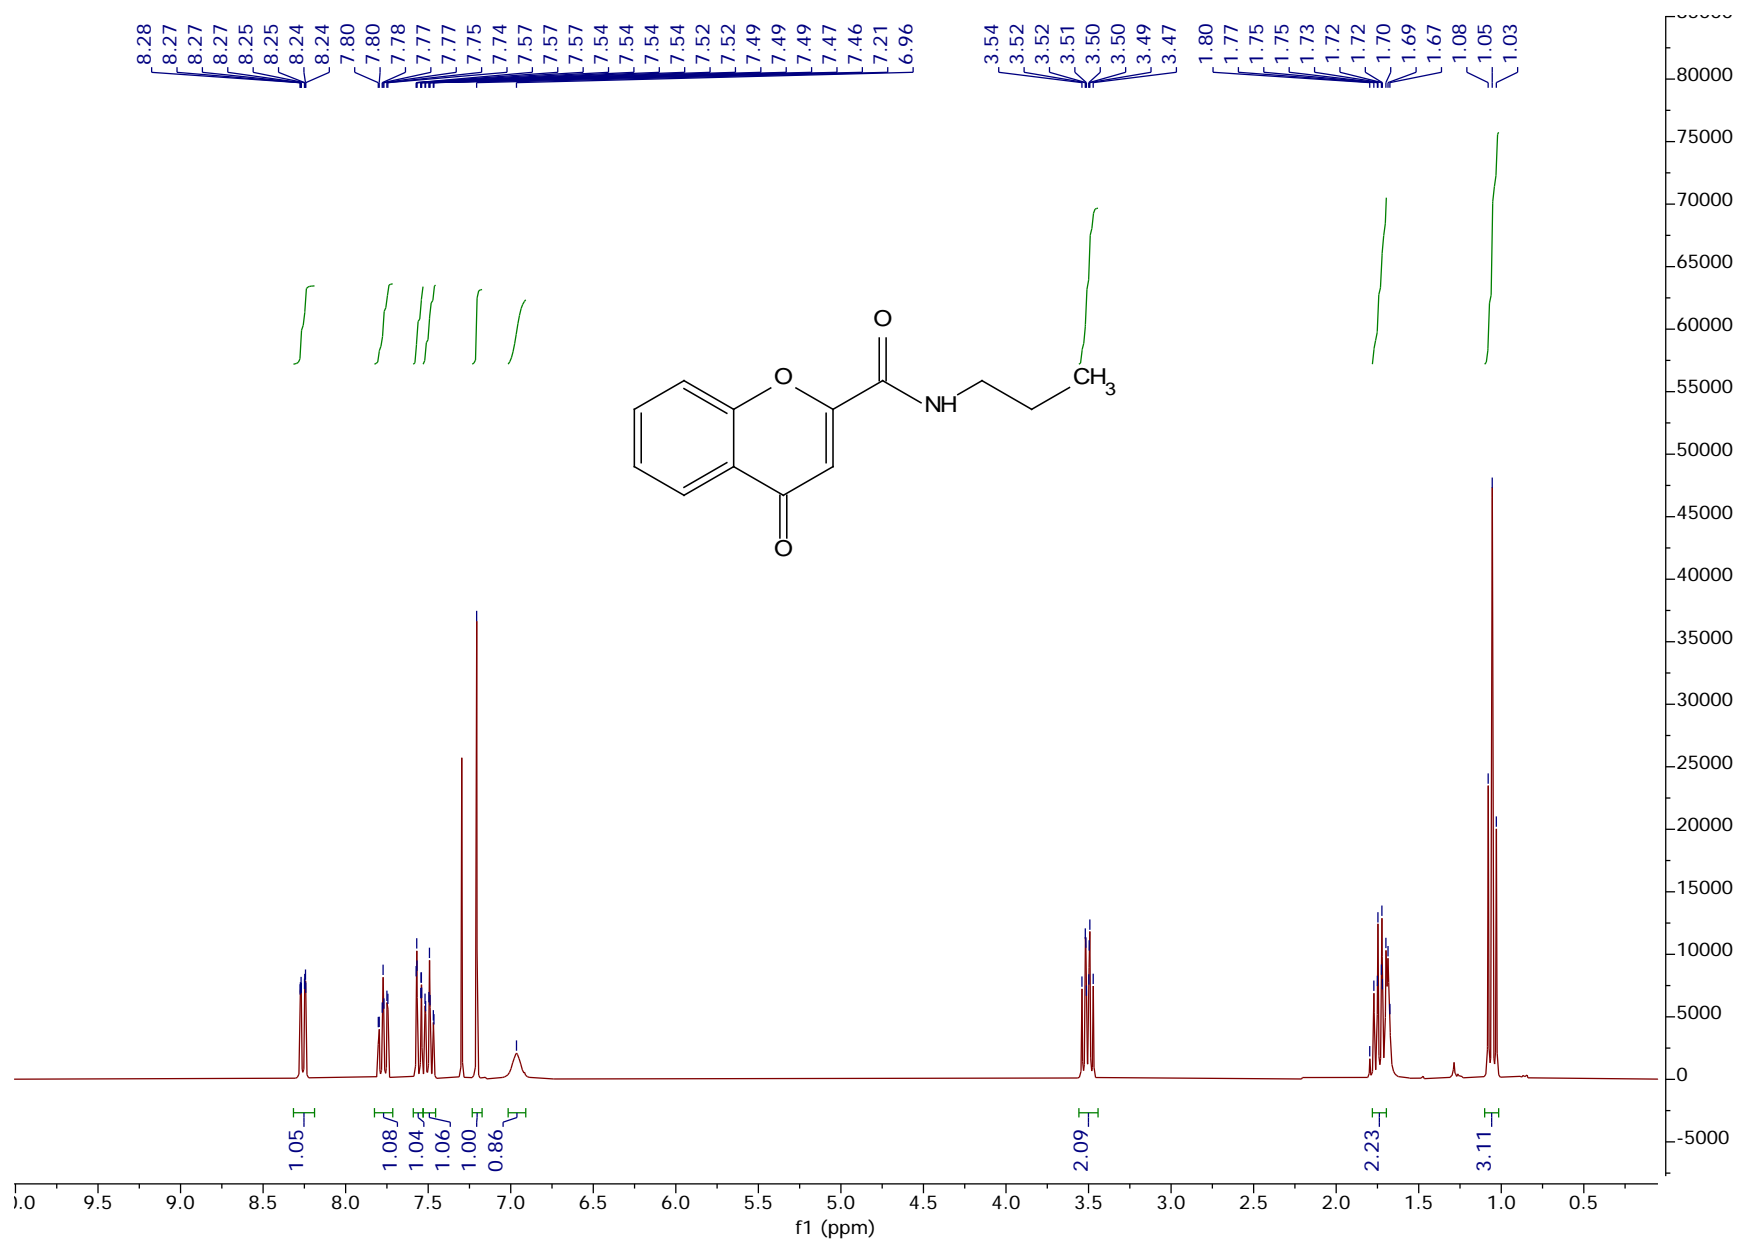

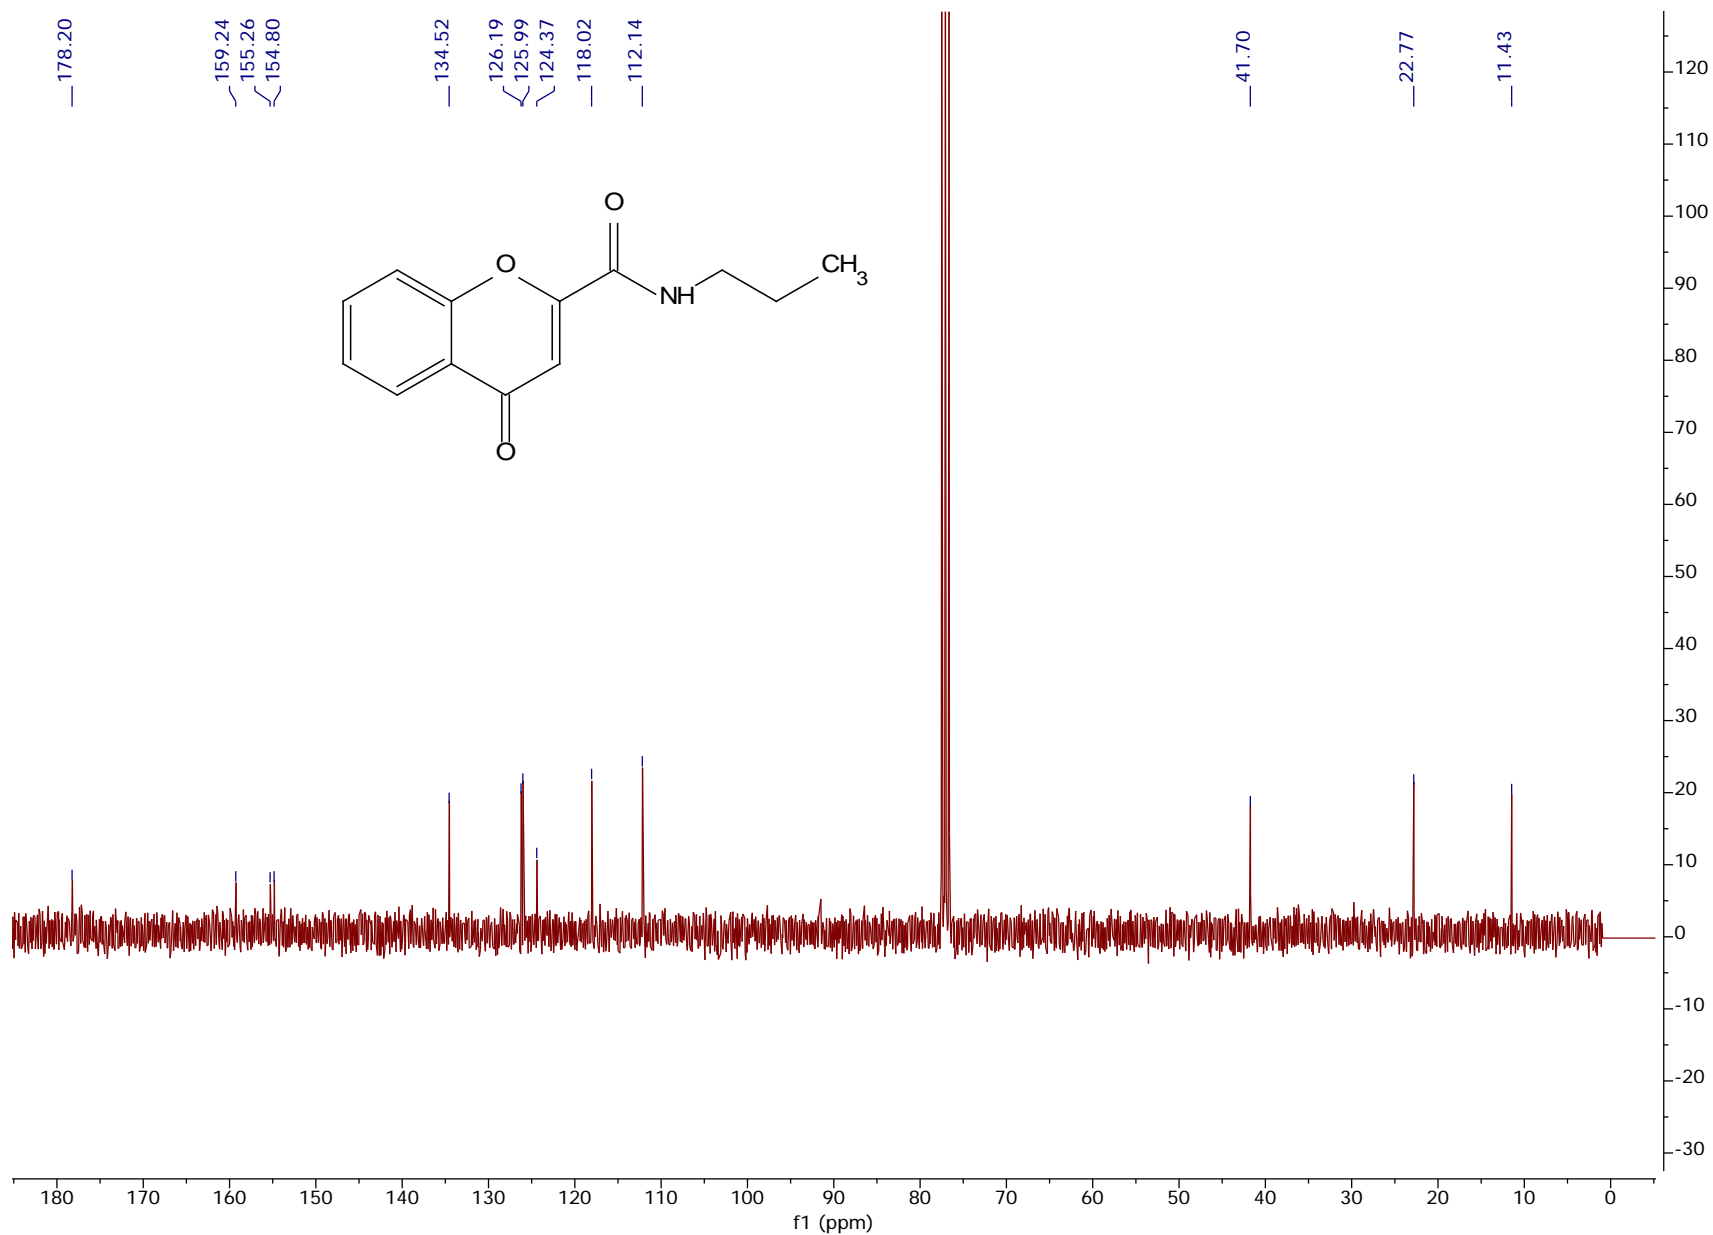

***N*-Cyclohexyl-4-oxo-4*H*-chromene-2-carboxamide (3x)**

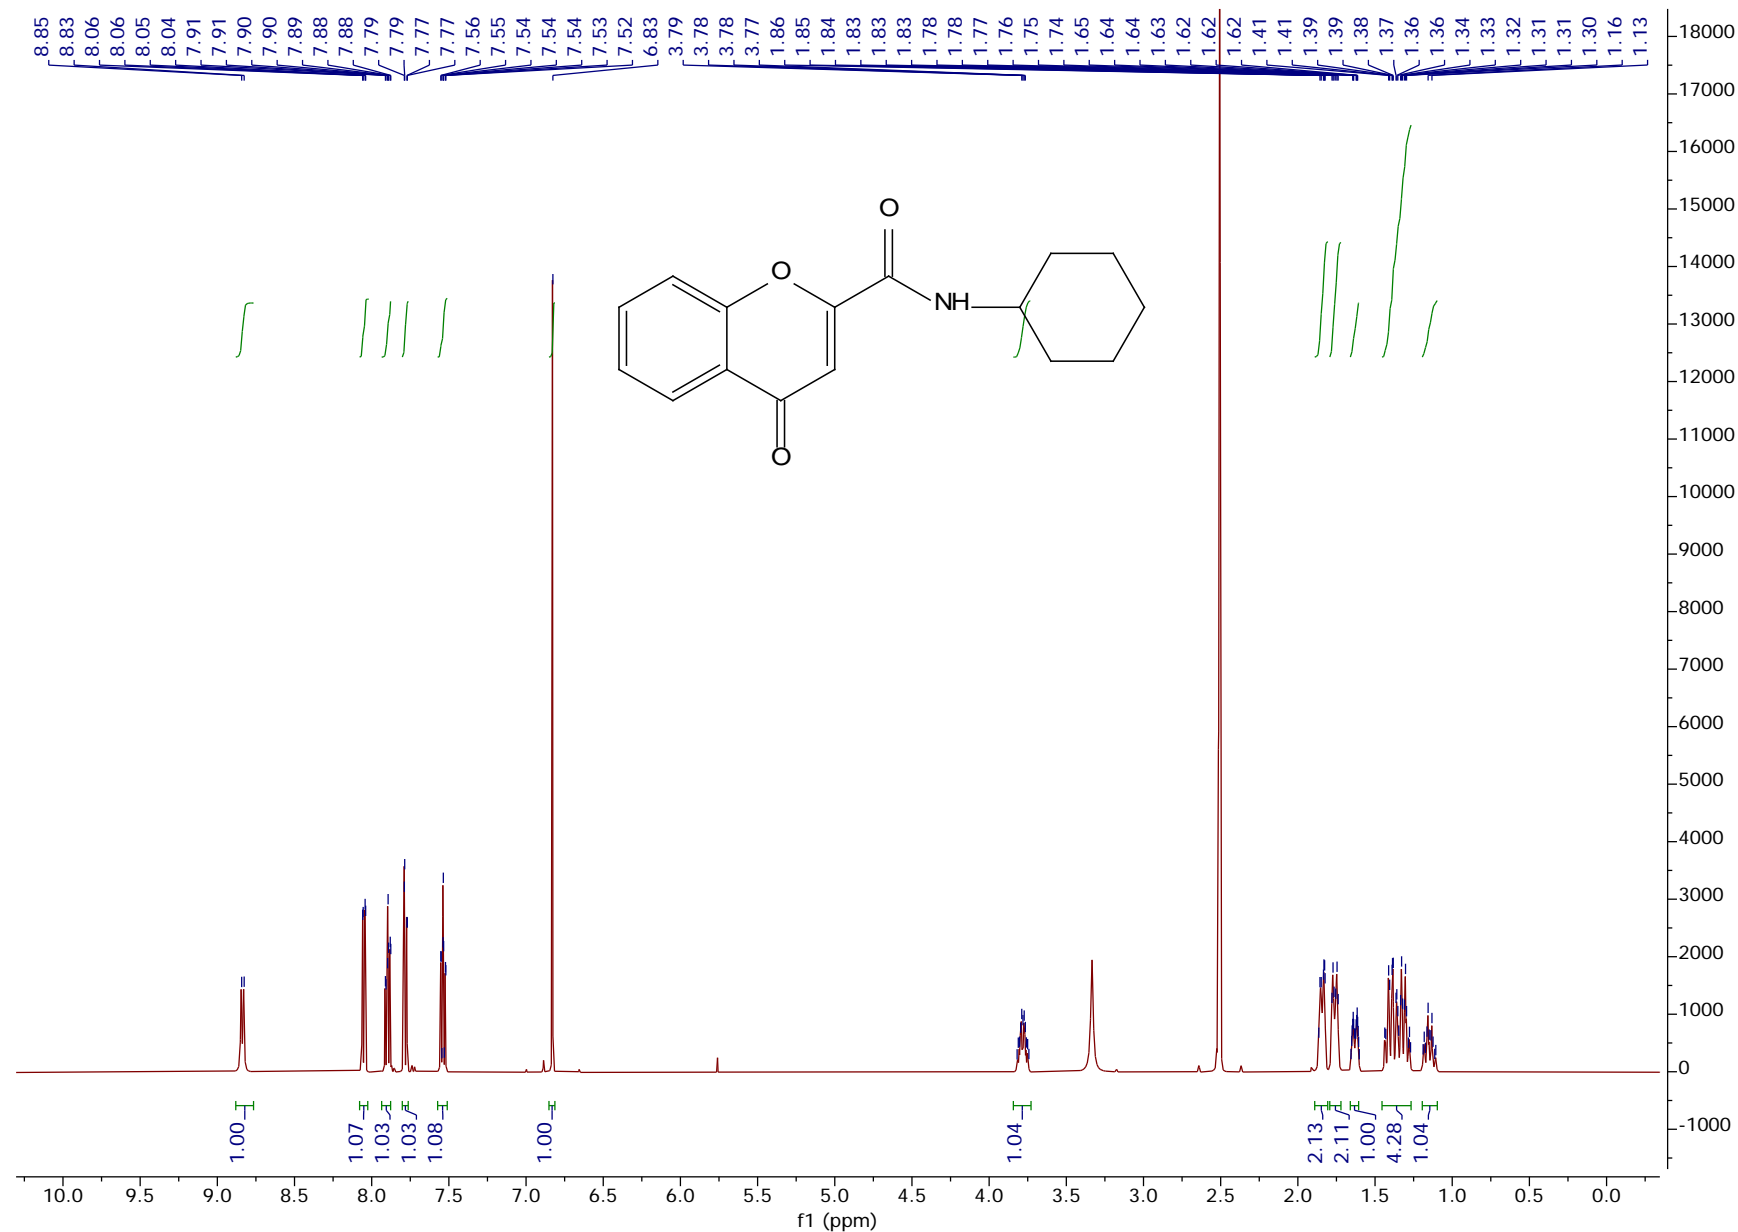

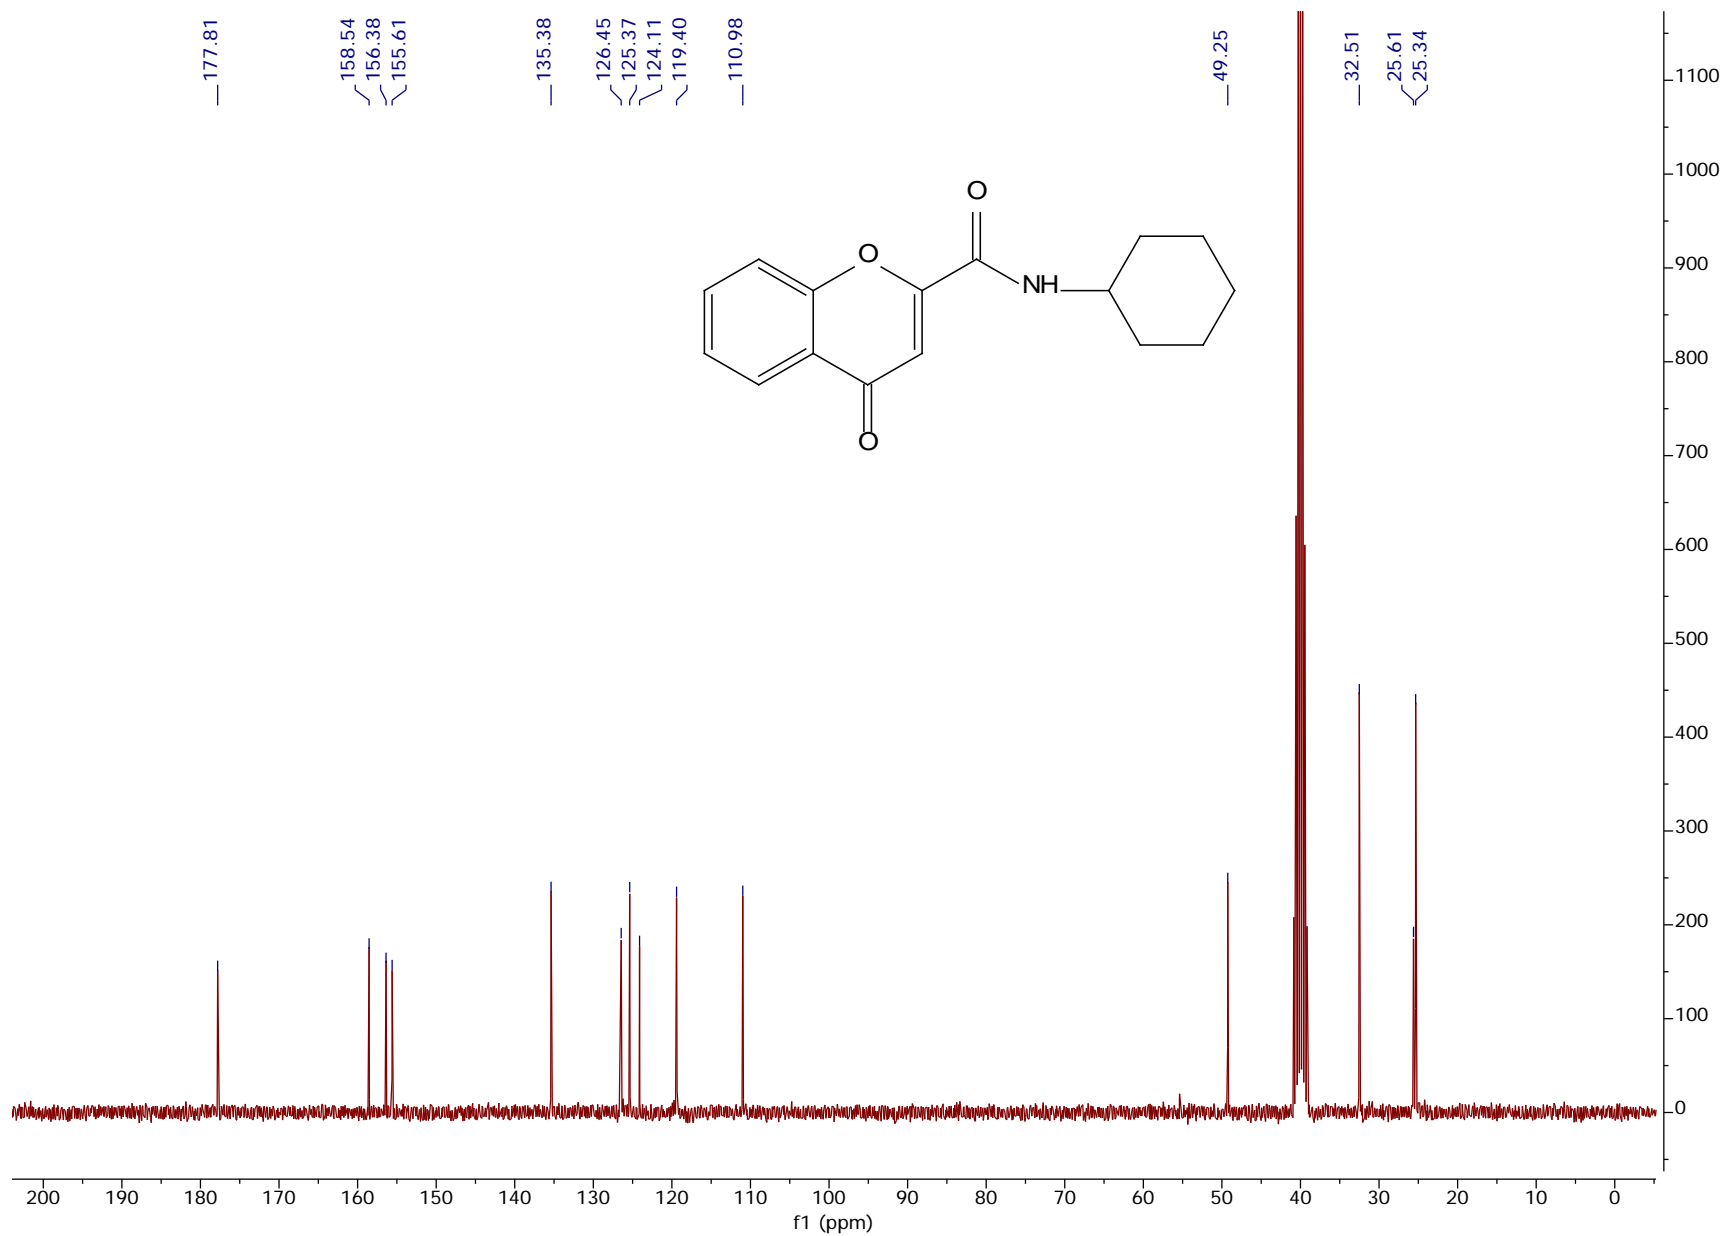

***N*-((3*s*,5*s*,7*s*)-Adamantan-1-yl)-4-oxo-4*H*-chromene-2-carboxamide (3y)**

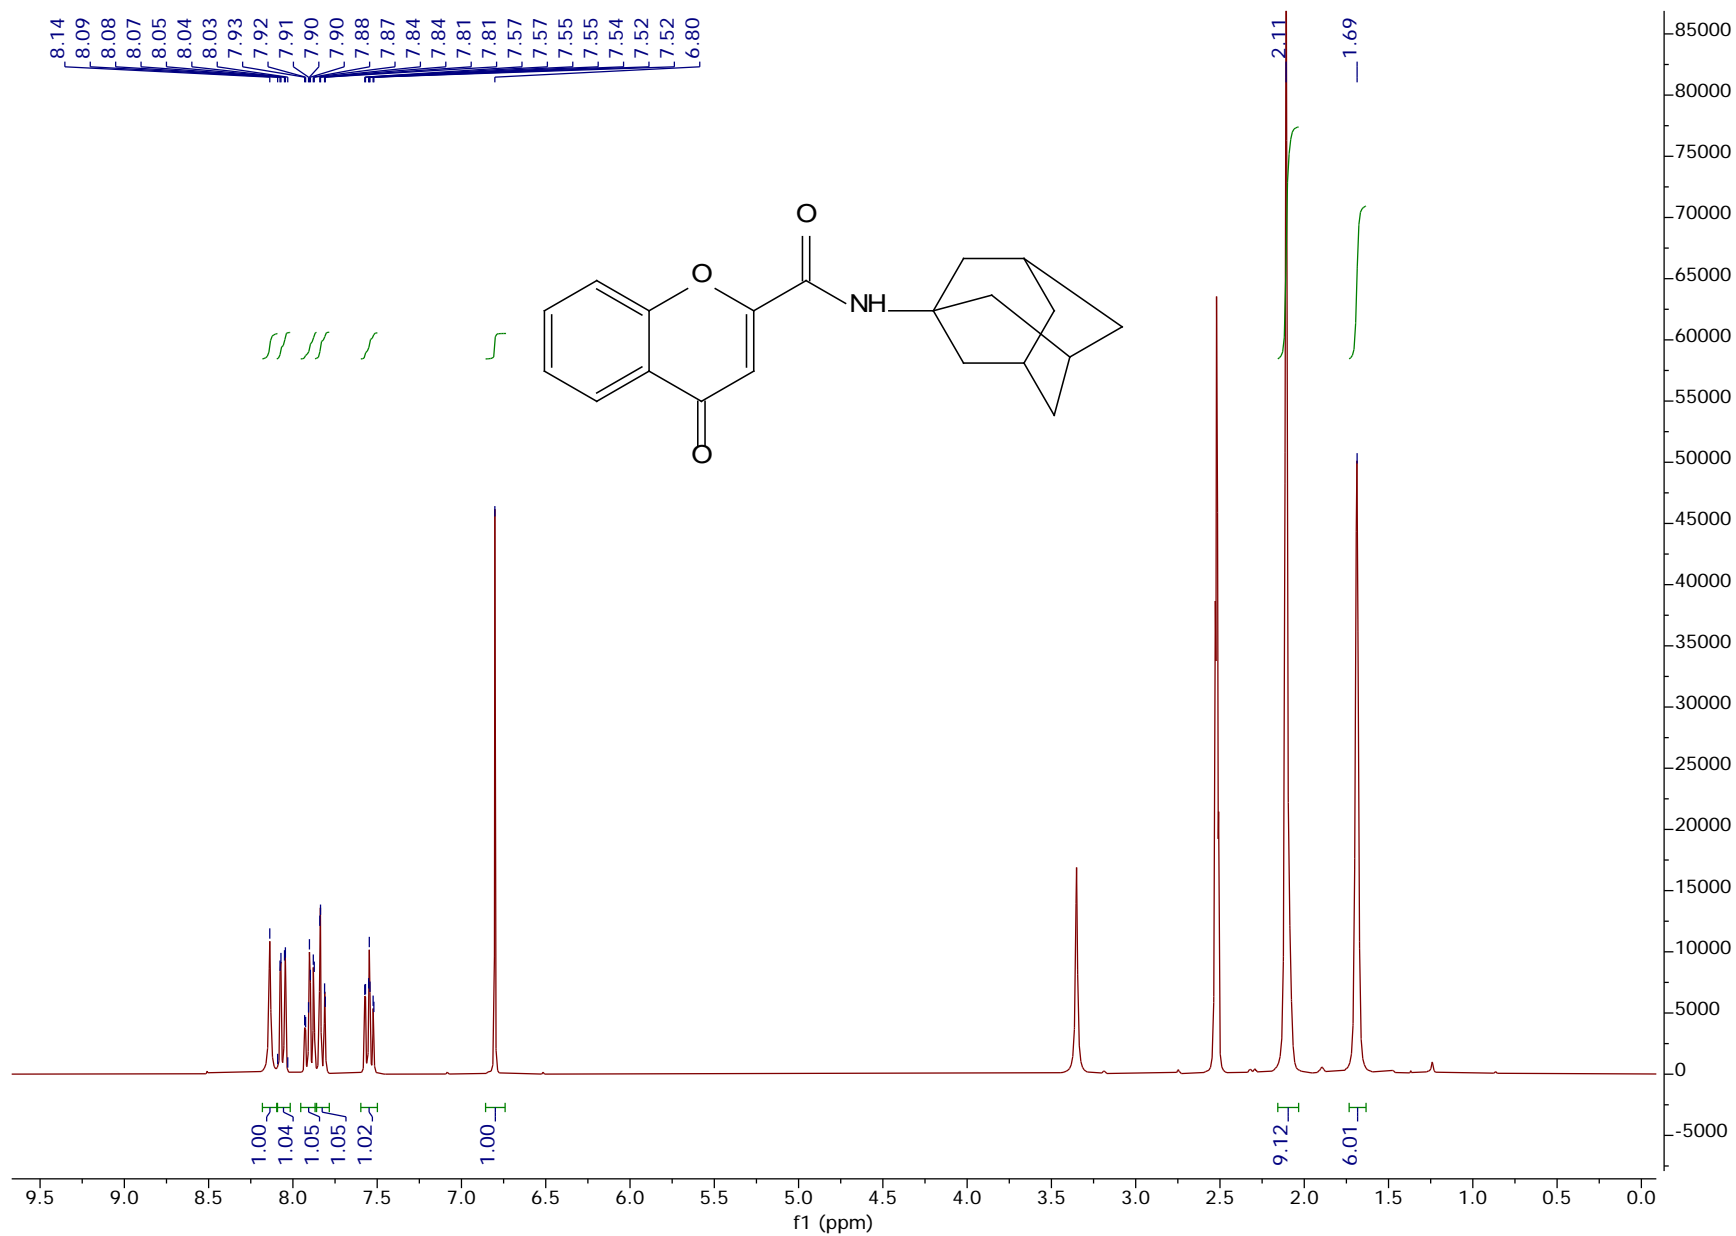

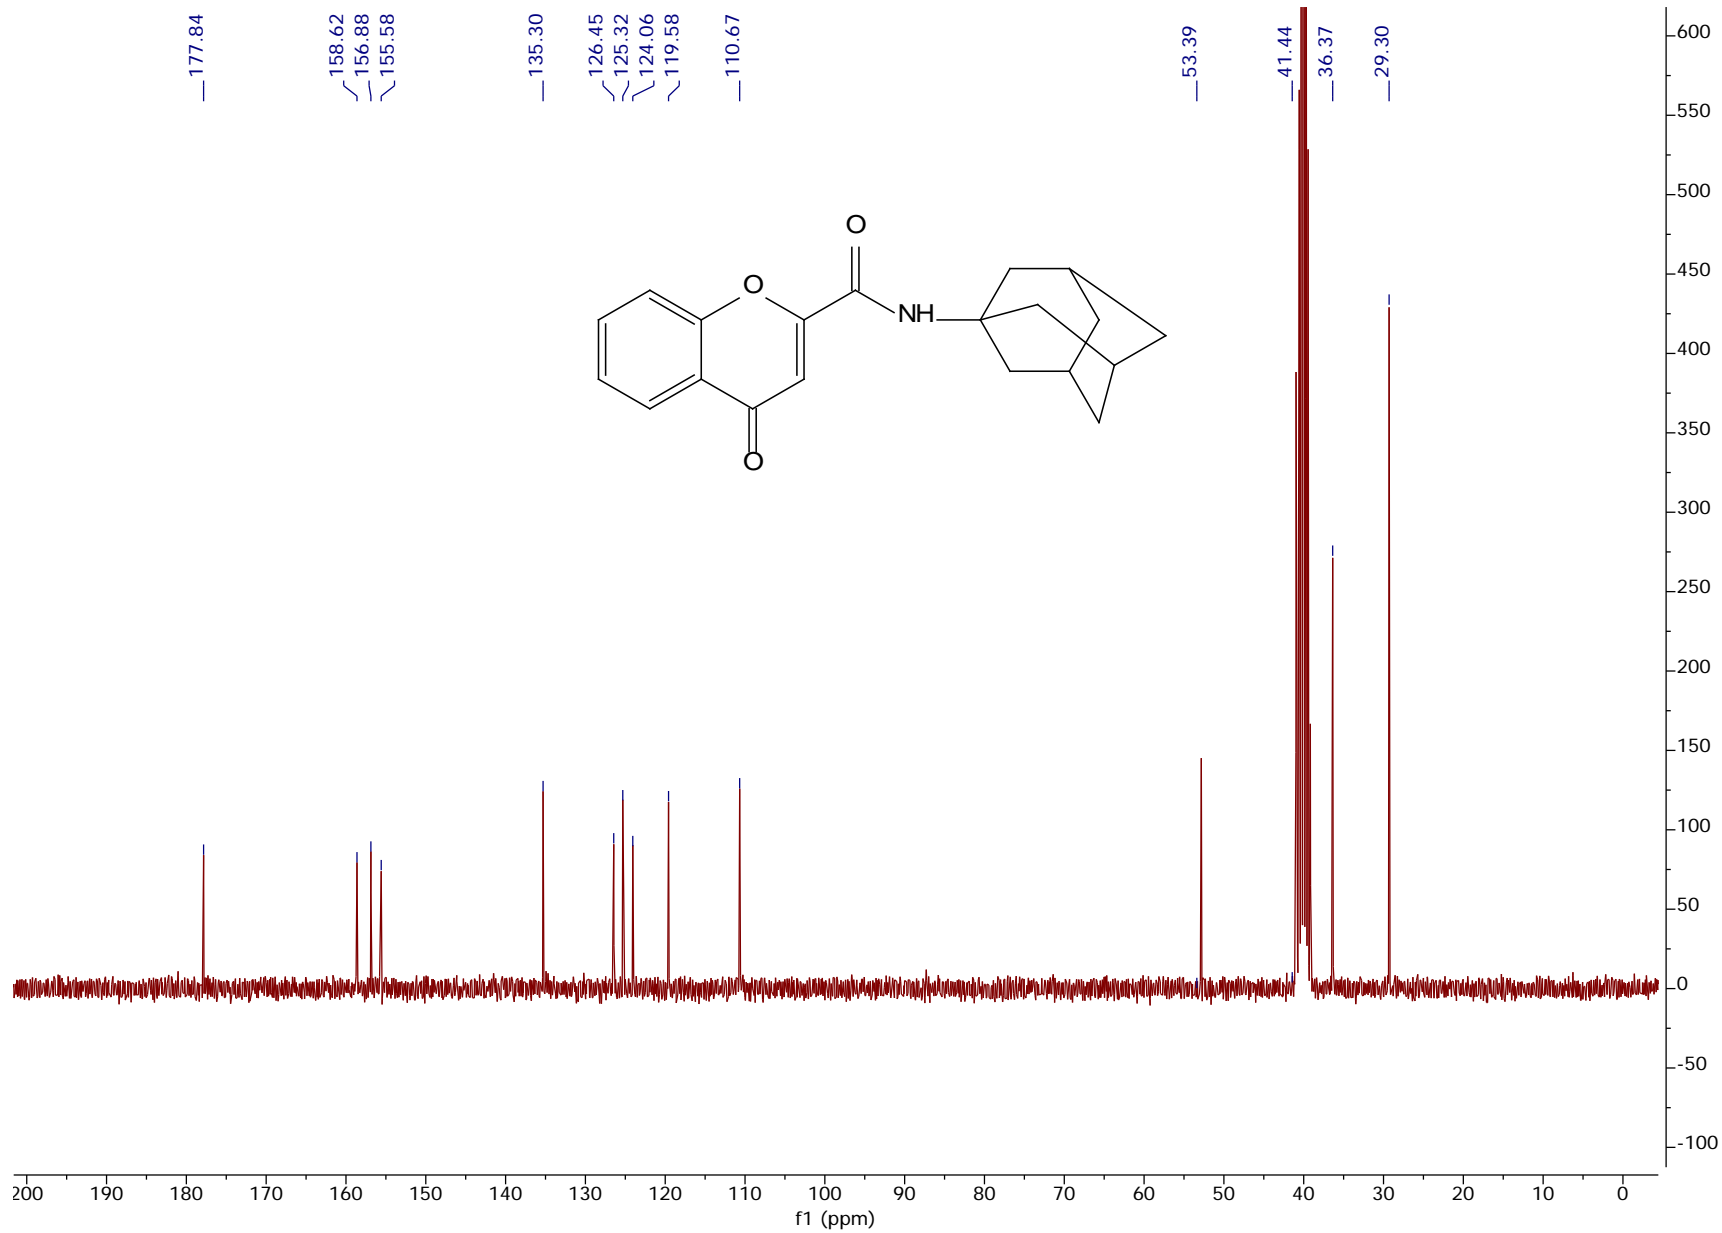

4-Oxo-N-(3-(pyrrolidin-1-yl)propyl)-4H-chromene-2-carboxamide (3z)

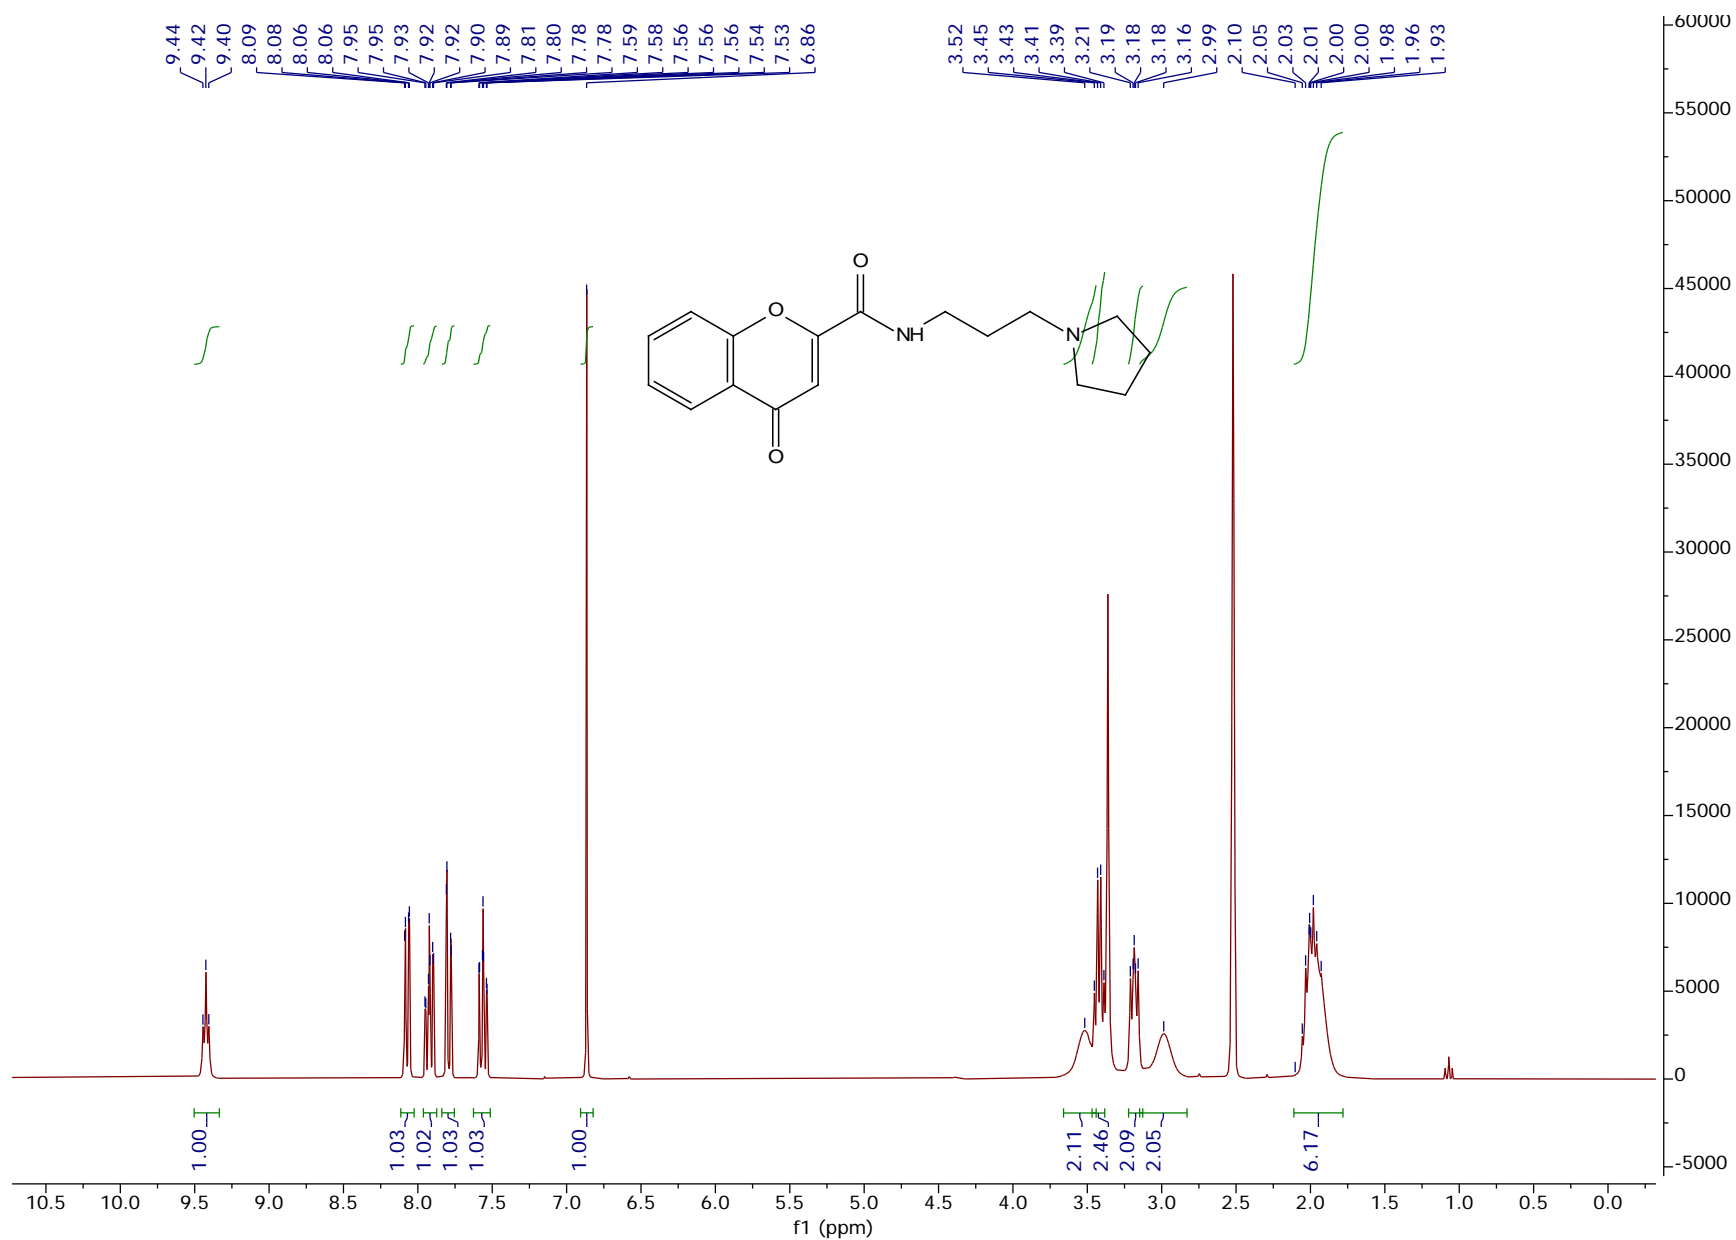

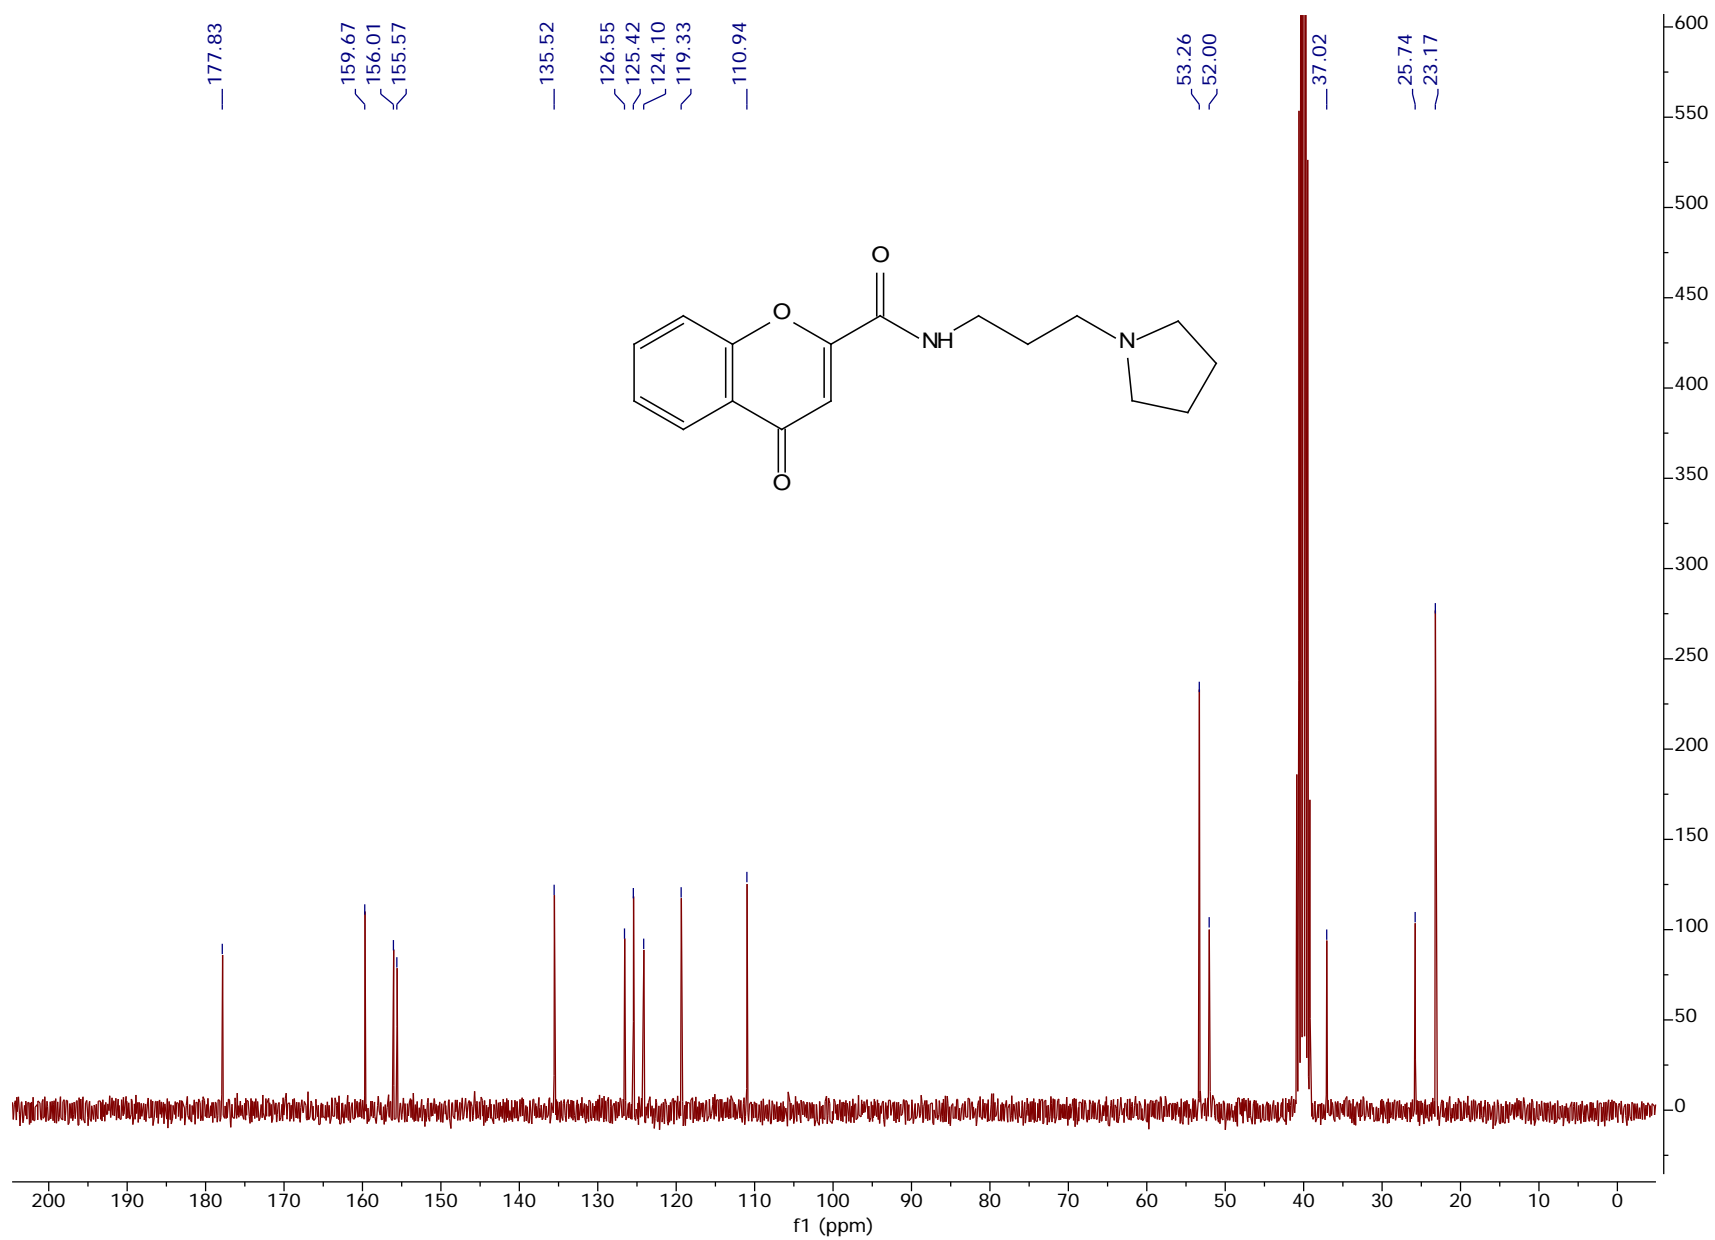



***N*-(3-Ethylphenyl)-4-oxo-4*H*-chromene-2-carboxamide (3'a)**

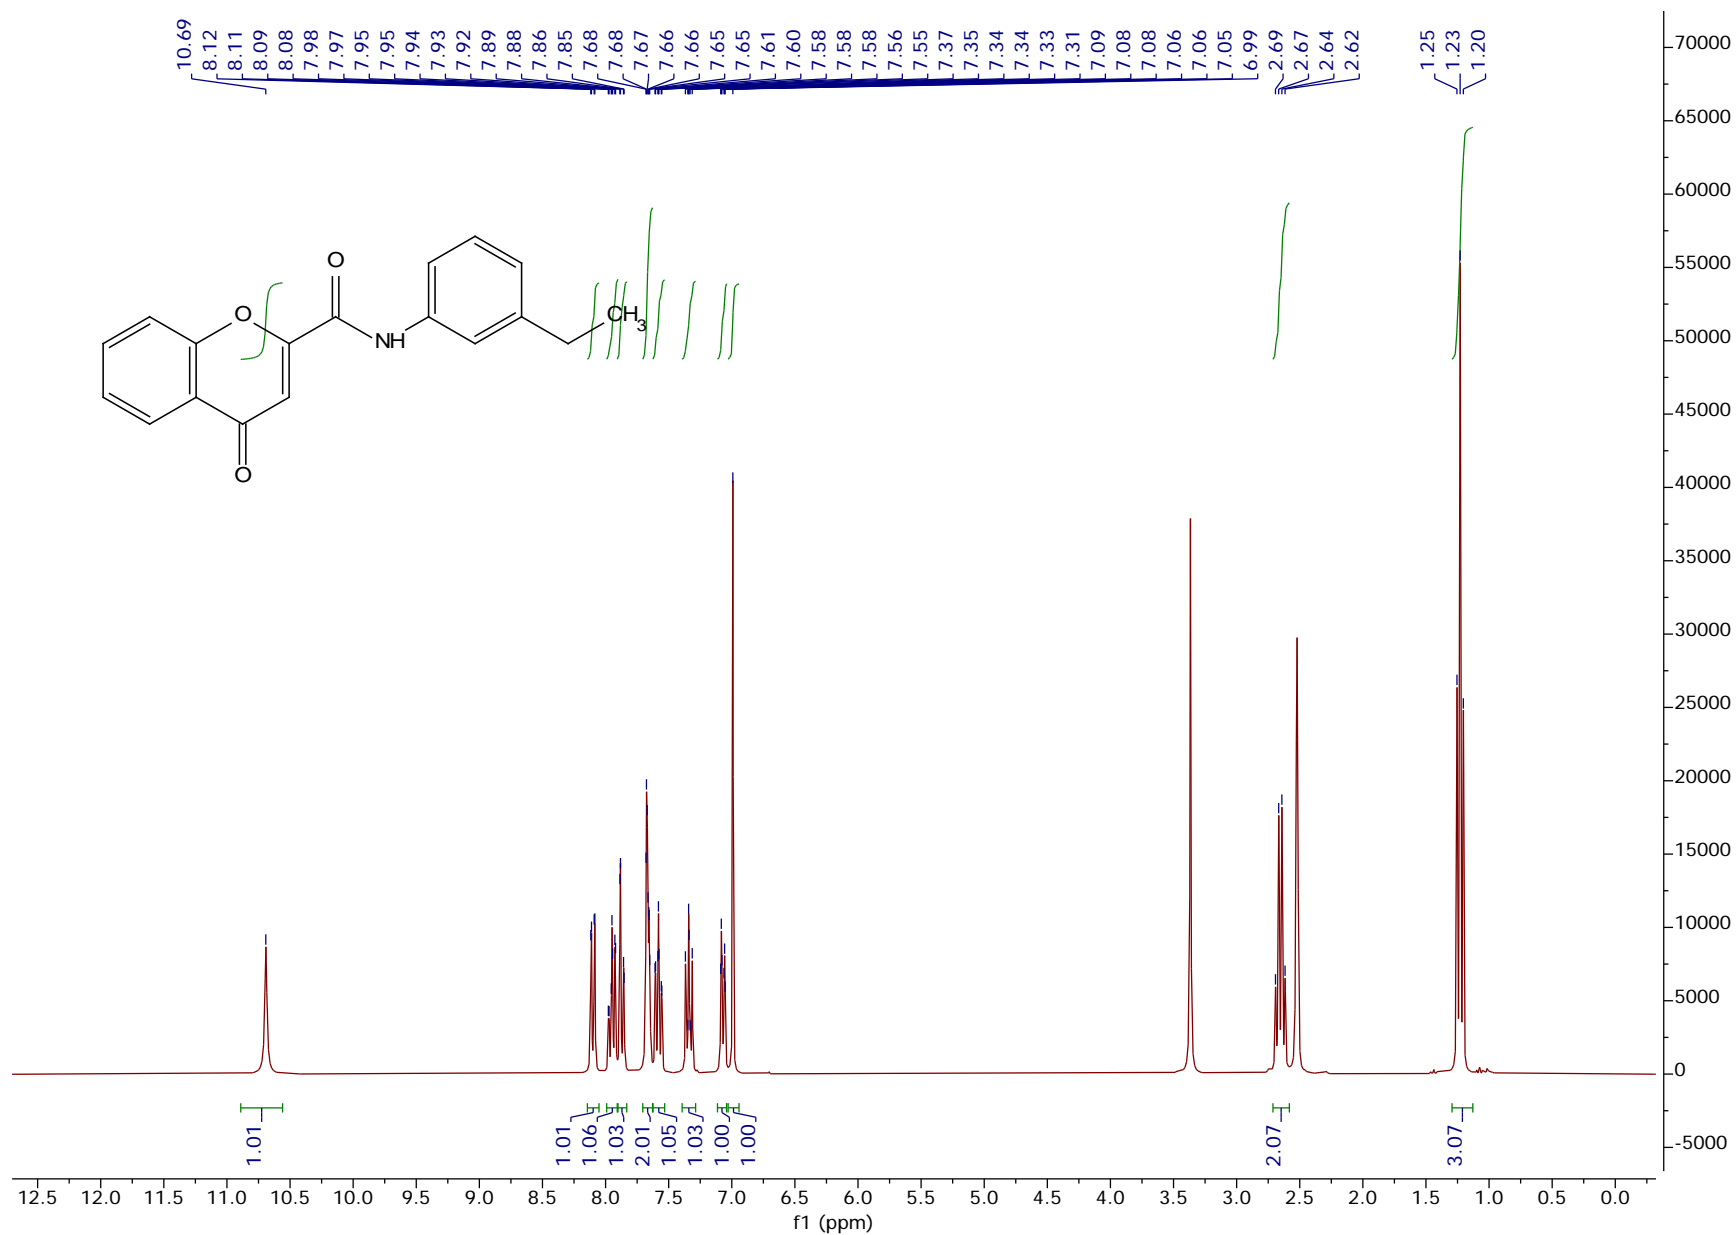

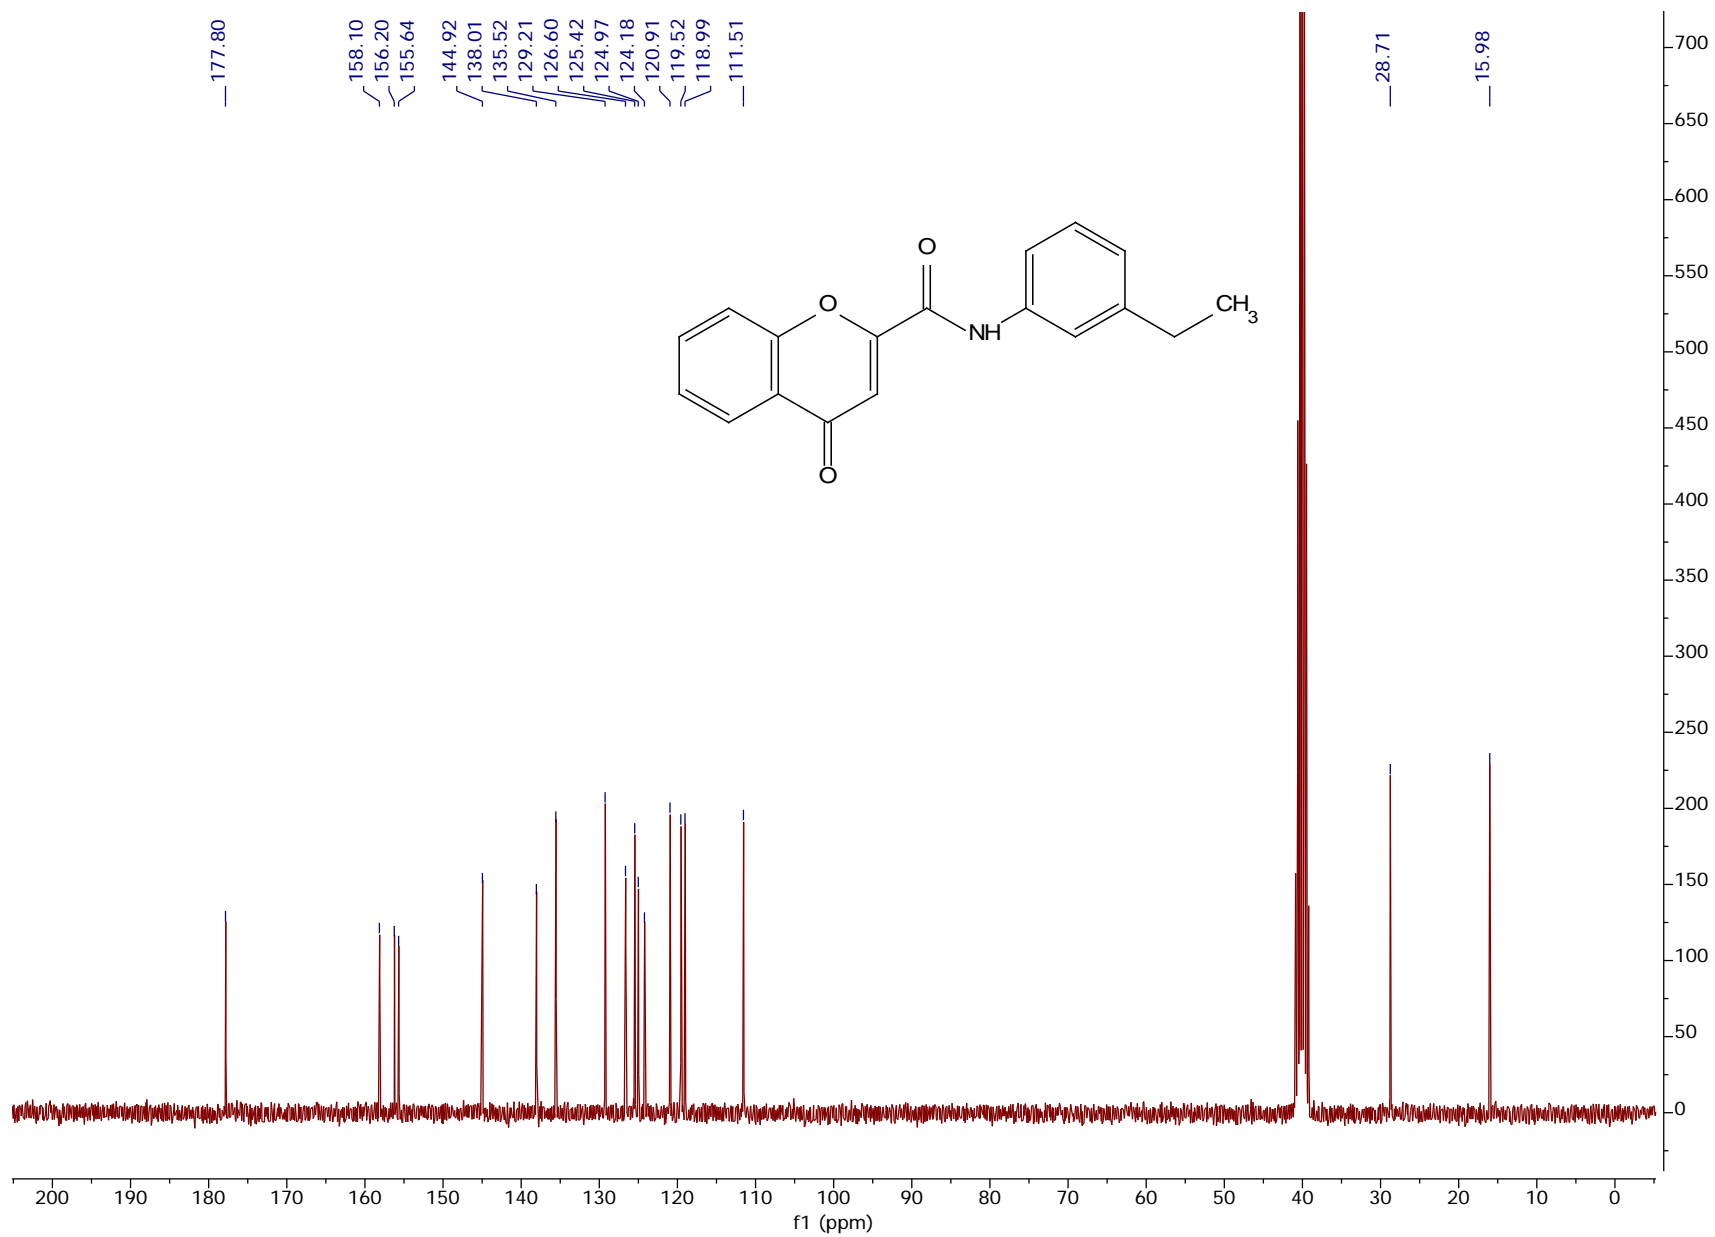

***N*-(3-((Diethylamino)methyl)-4-hydroxyphenyl)-4-oxo-4*H*-chromene-2-carboxamide (3'b)**

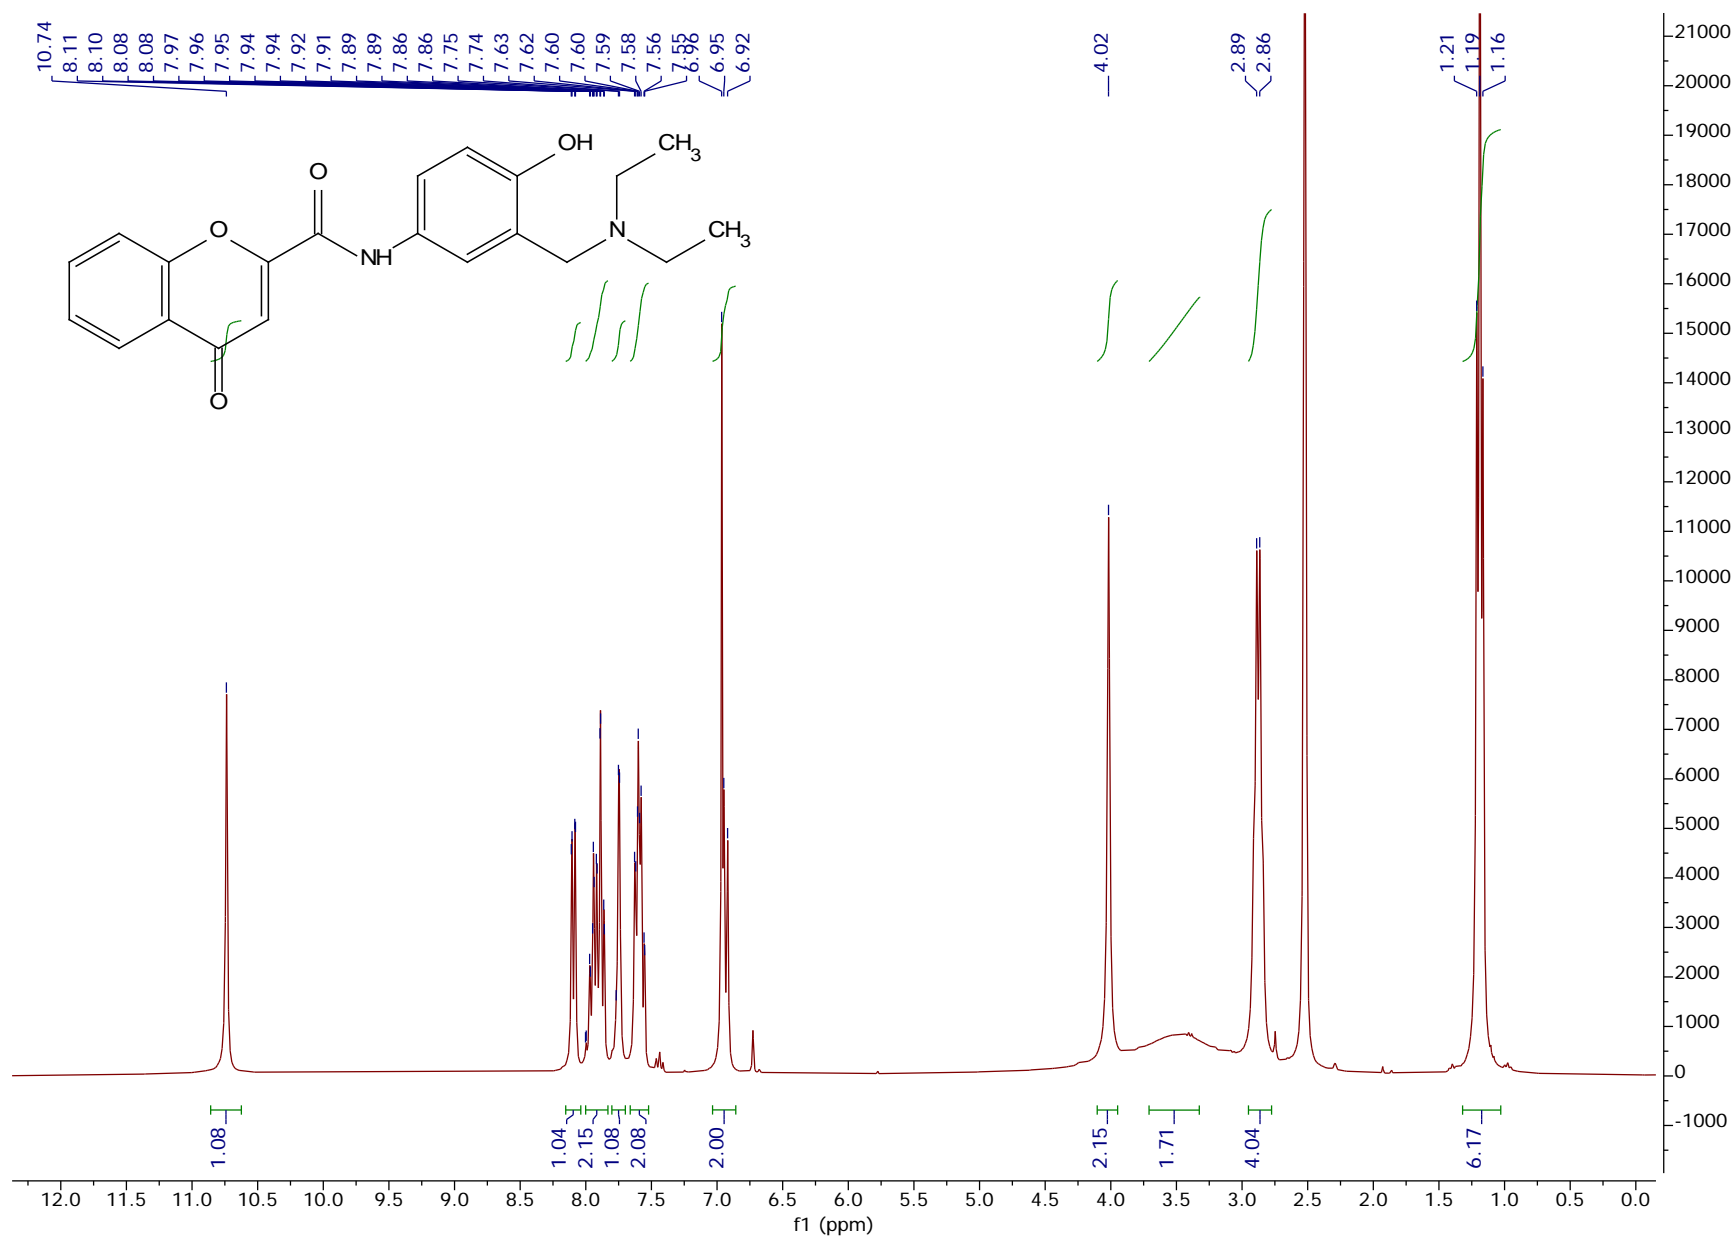

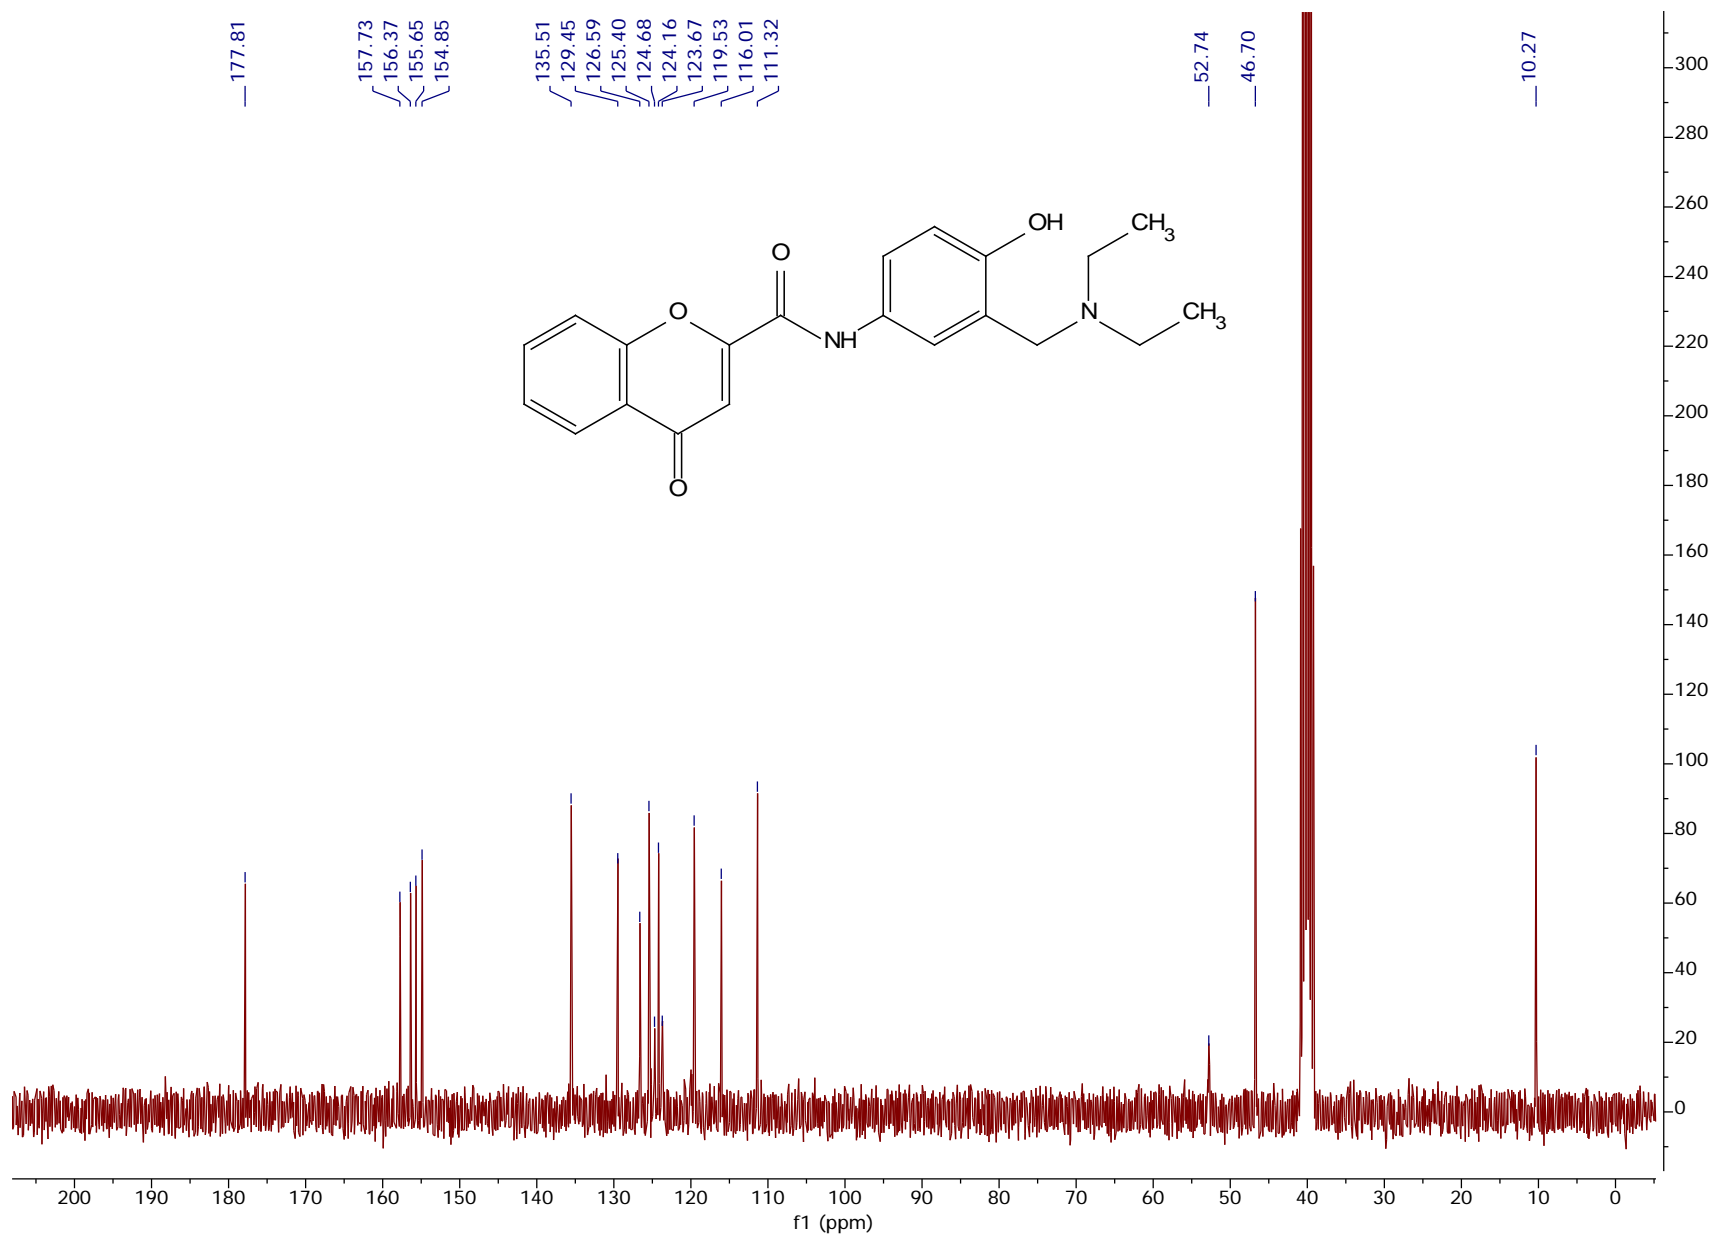

***N*-(4-((1*H*-imidazol-1-yl)methyl)phenyl)-4-oxo-4*H*-chromene-2-carboxamide (3'*c*)**

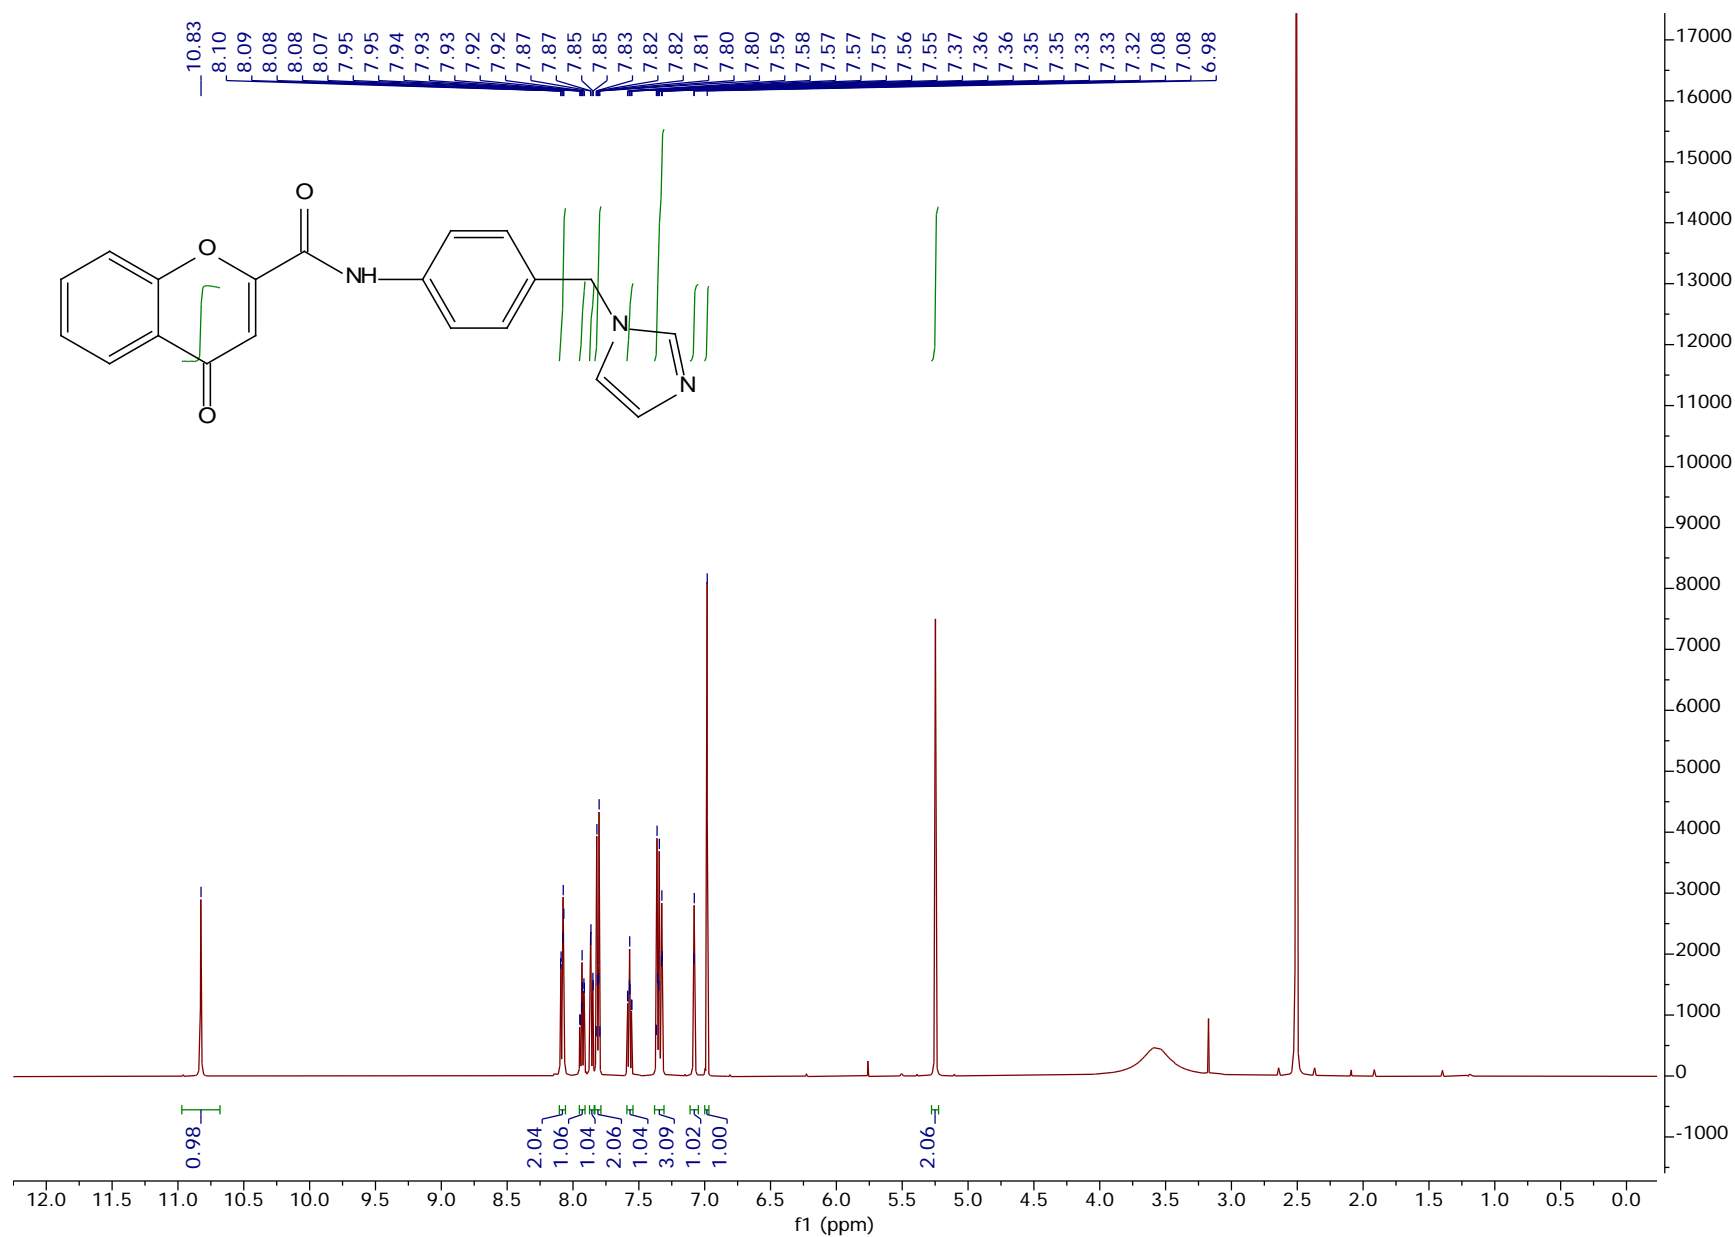

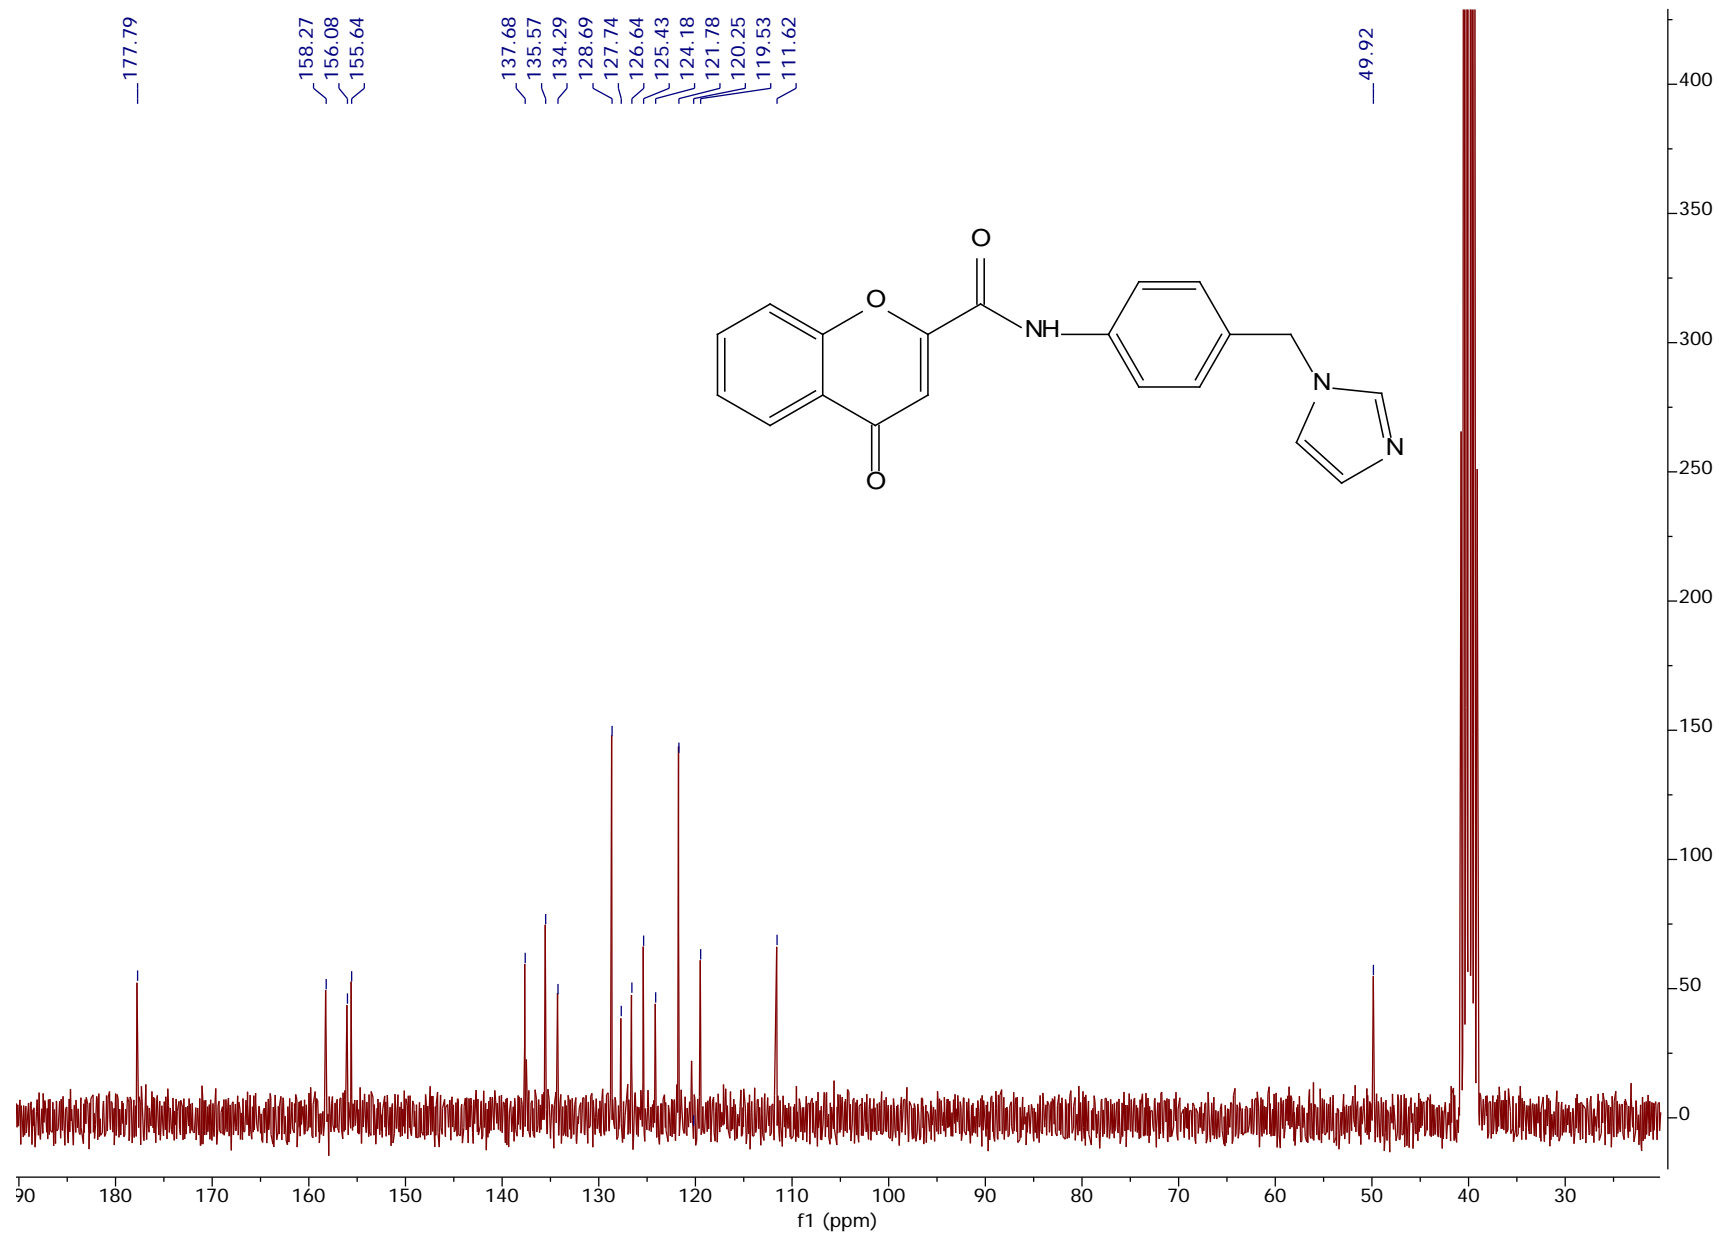

2-(4-(2-Oxo-2-(pyrrolidin-1-yl)ethyl)piperazine-1-carbonyl)-4*H*-chromen-4-one (3'd)

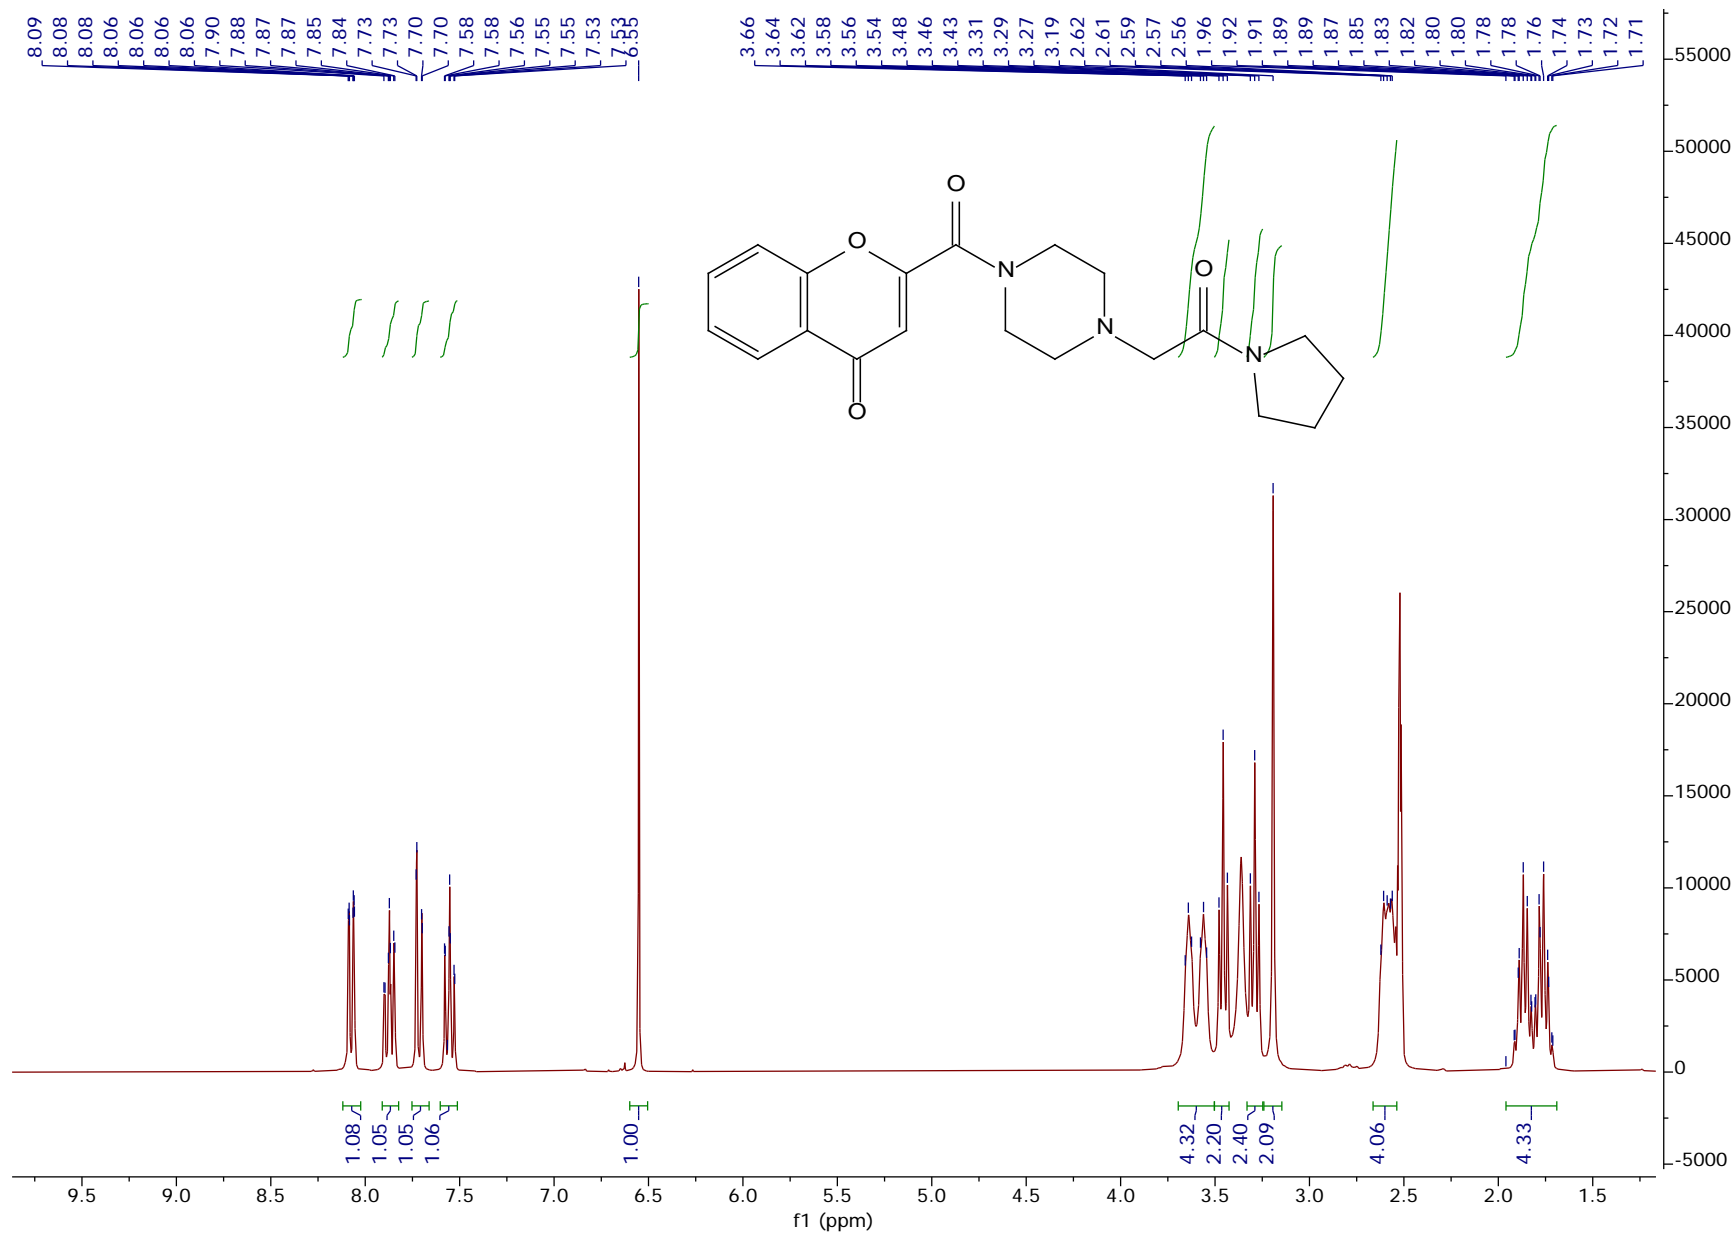

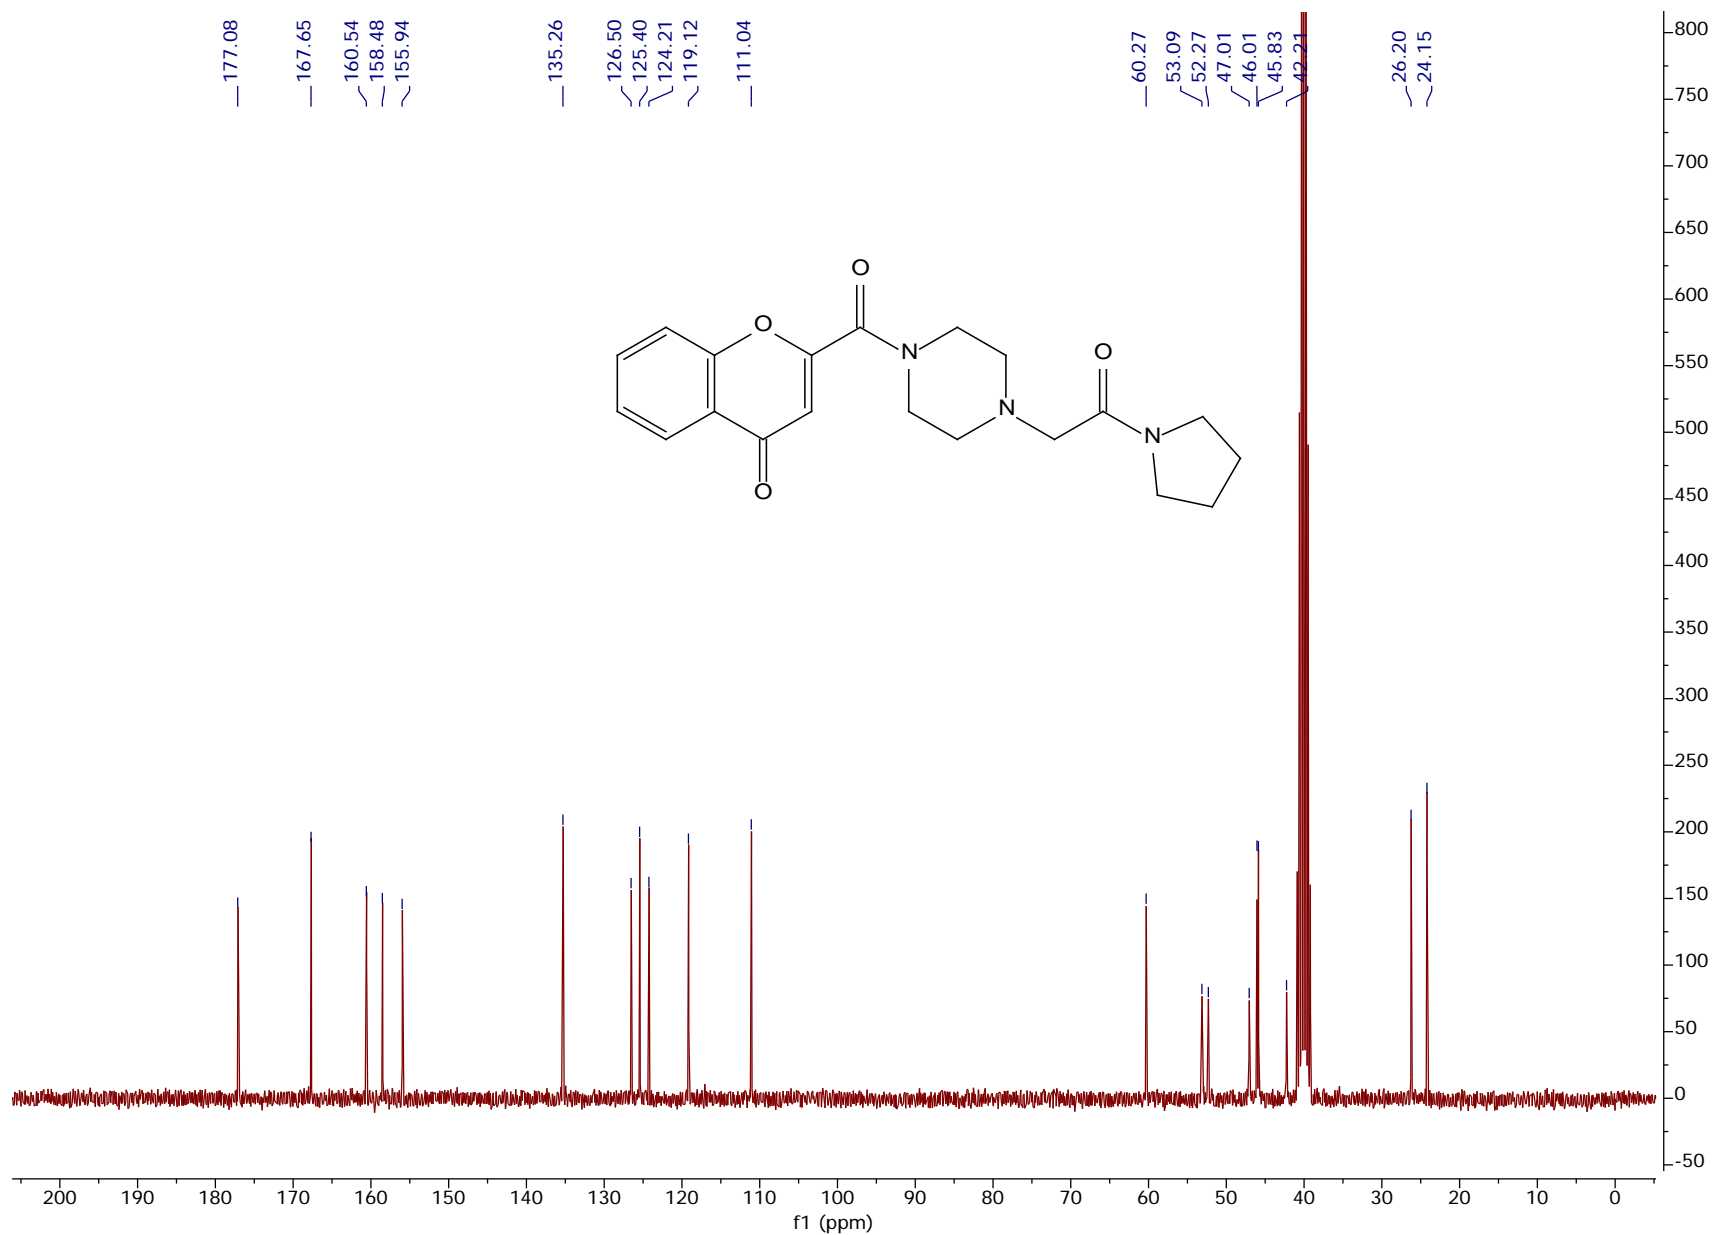



**tert-Butyl 4-((4-oxo-4H-chromene-2-carboxamido)methyl)piperidine-1-carboxylate (3'e)**

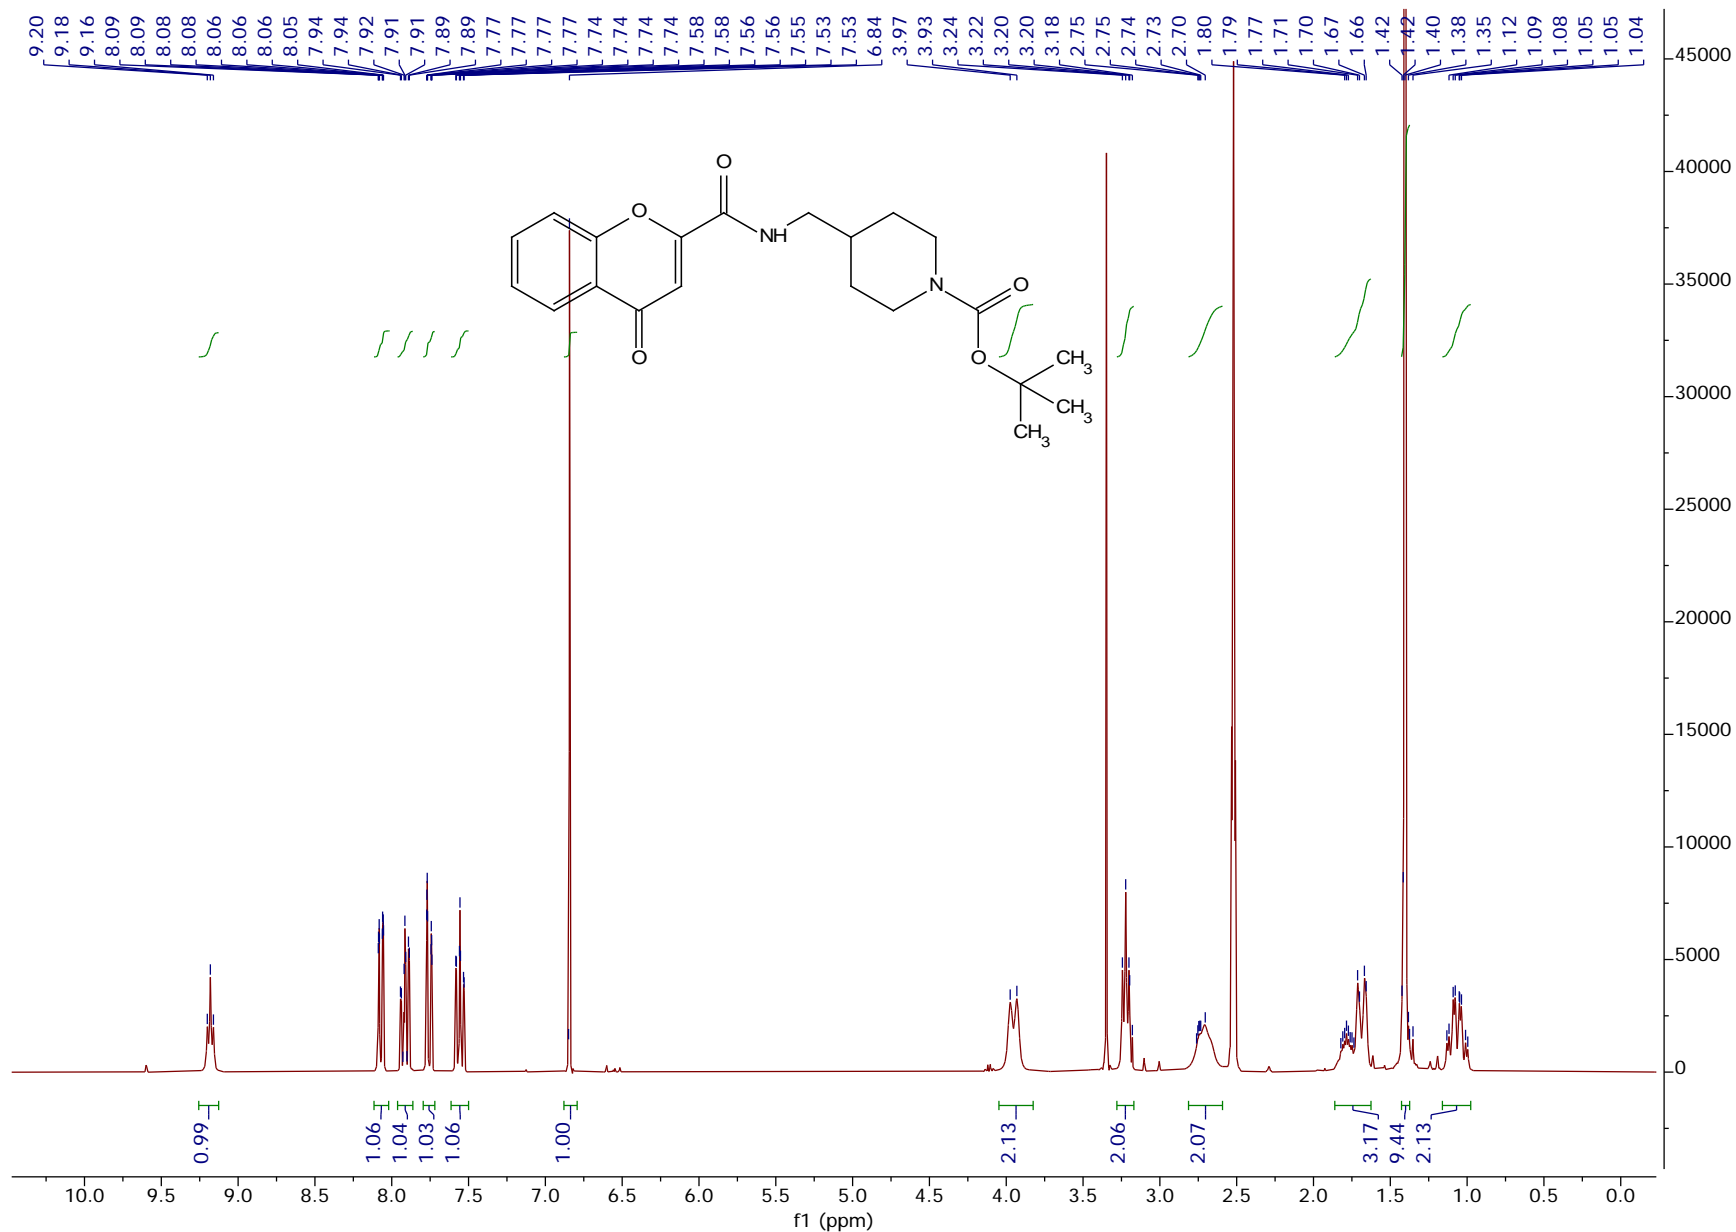

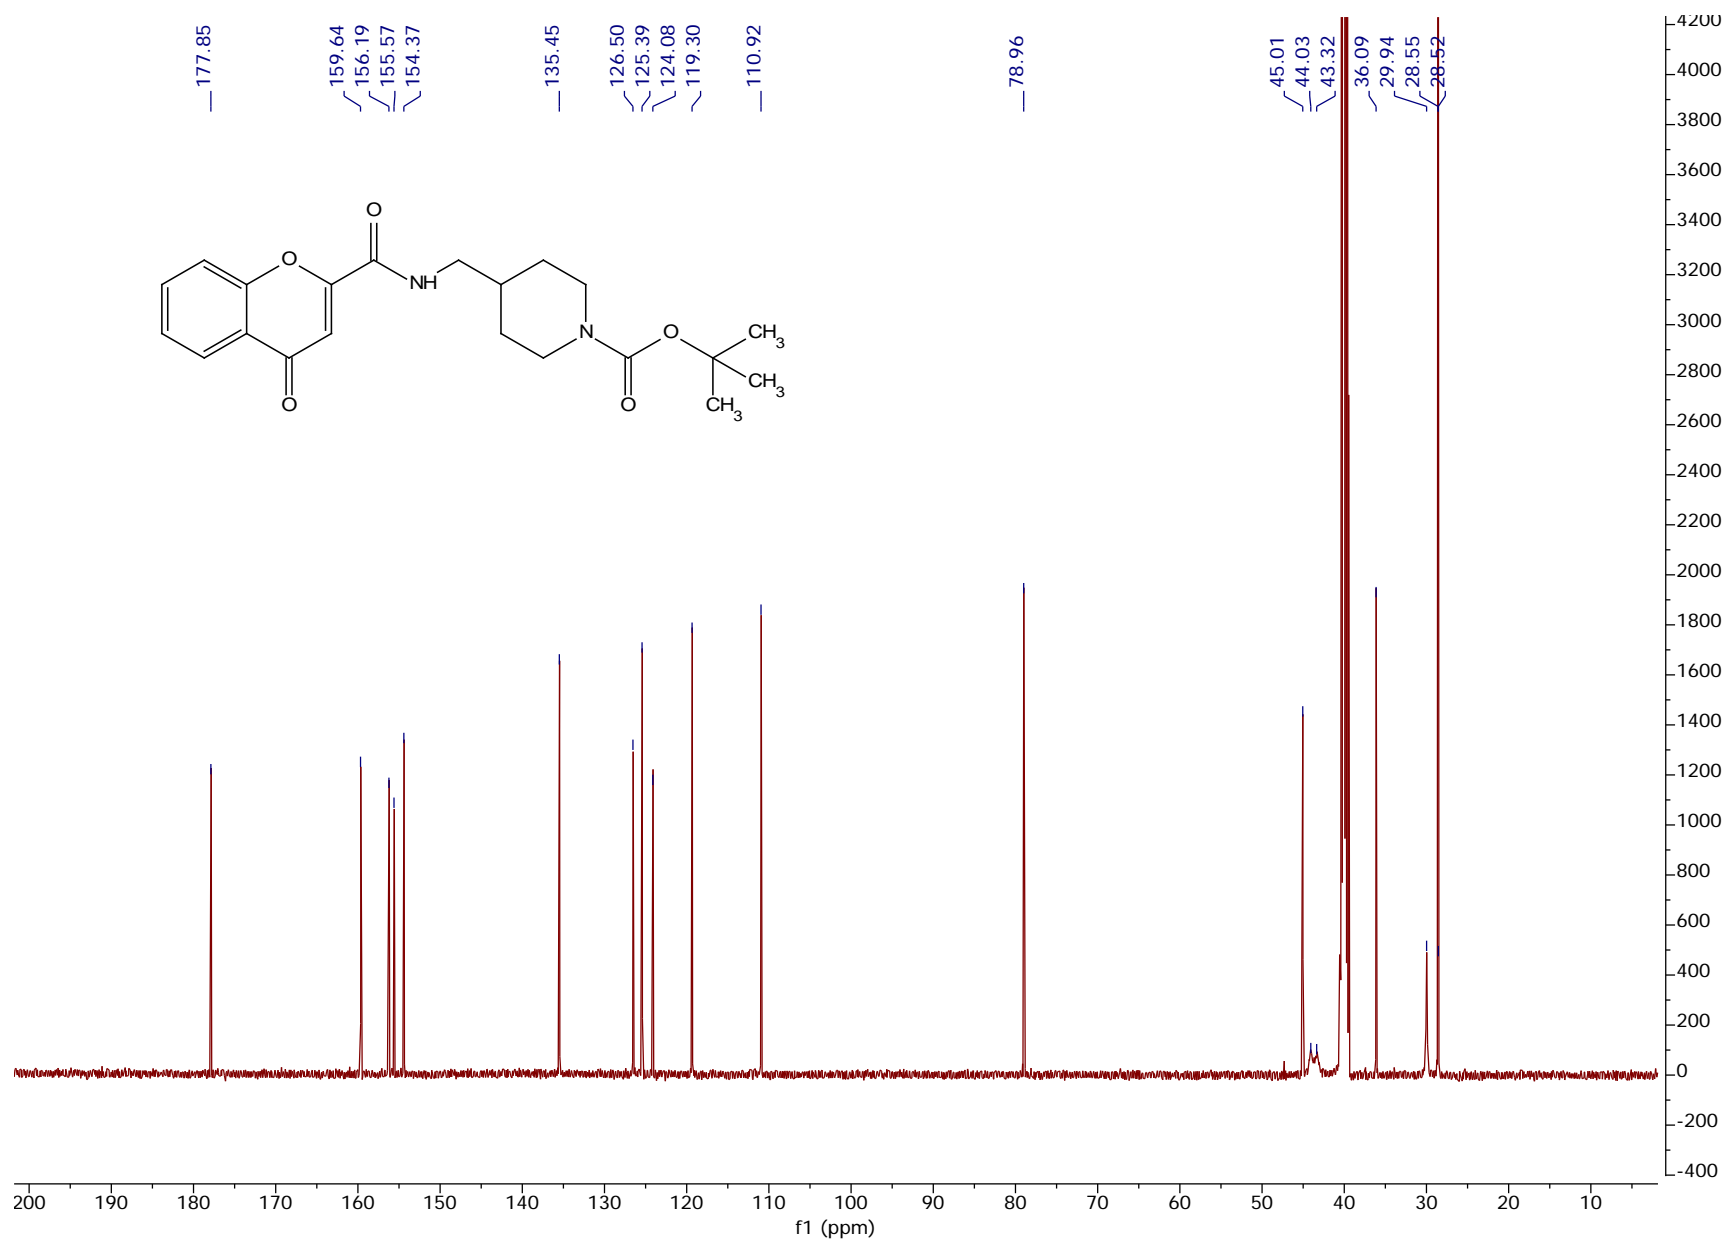

***N*-(5-(Diethylamino)pentan-2-yl)-4-oxo-4*H*-chromene-2-carboxamide (3'f)**

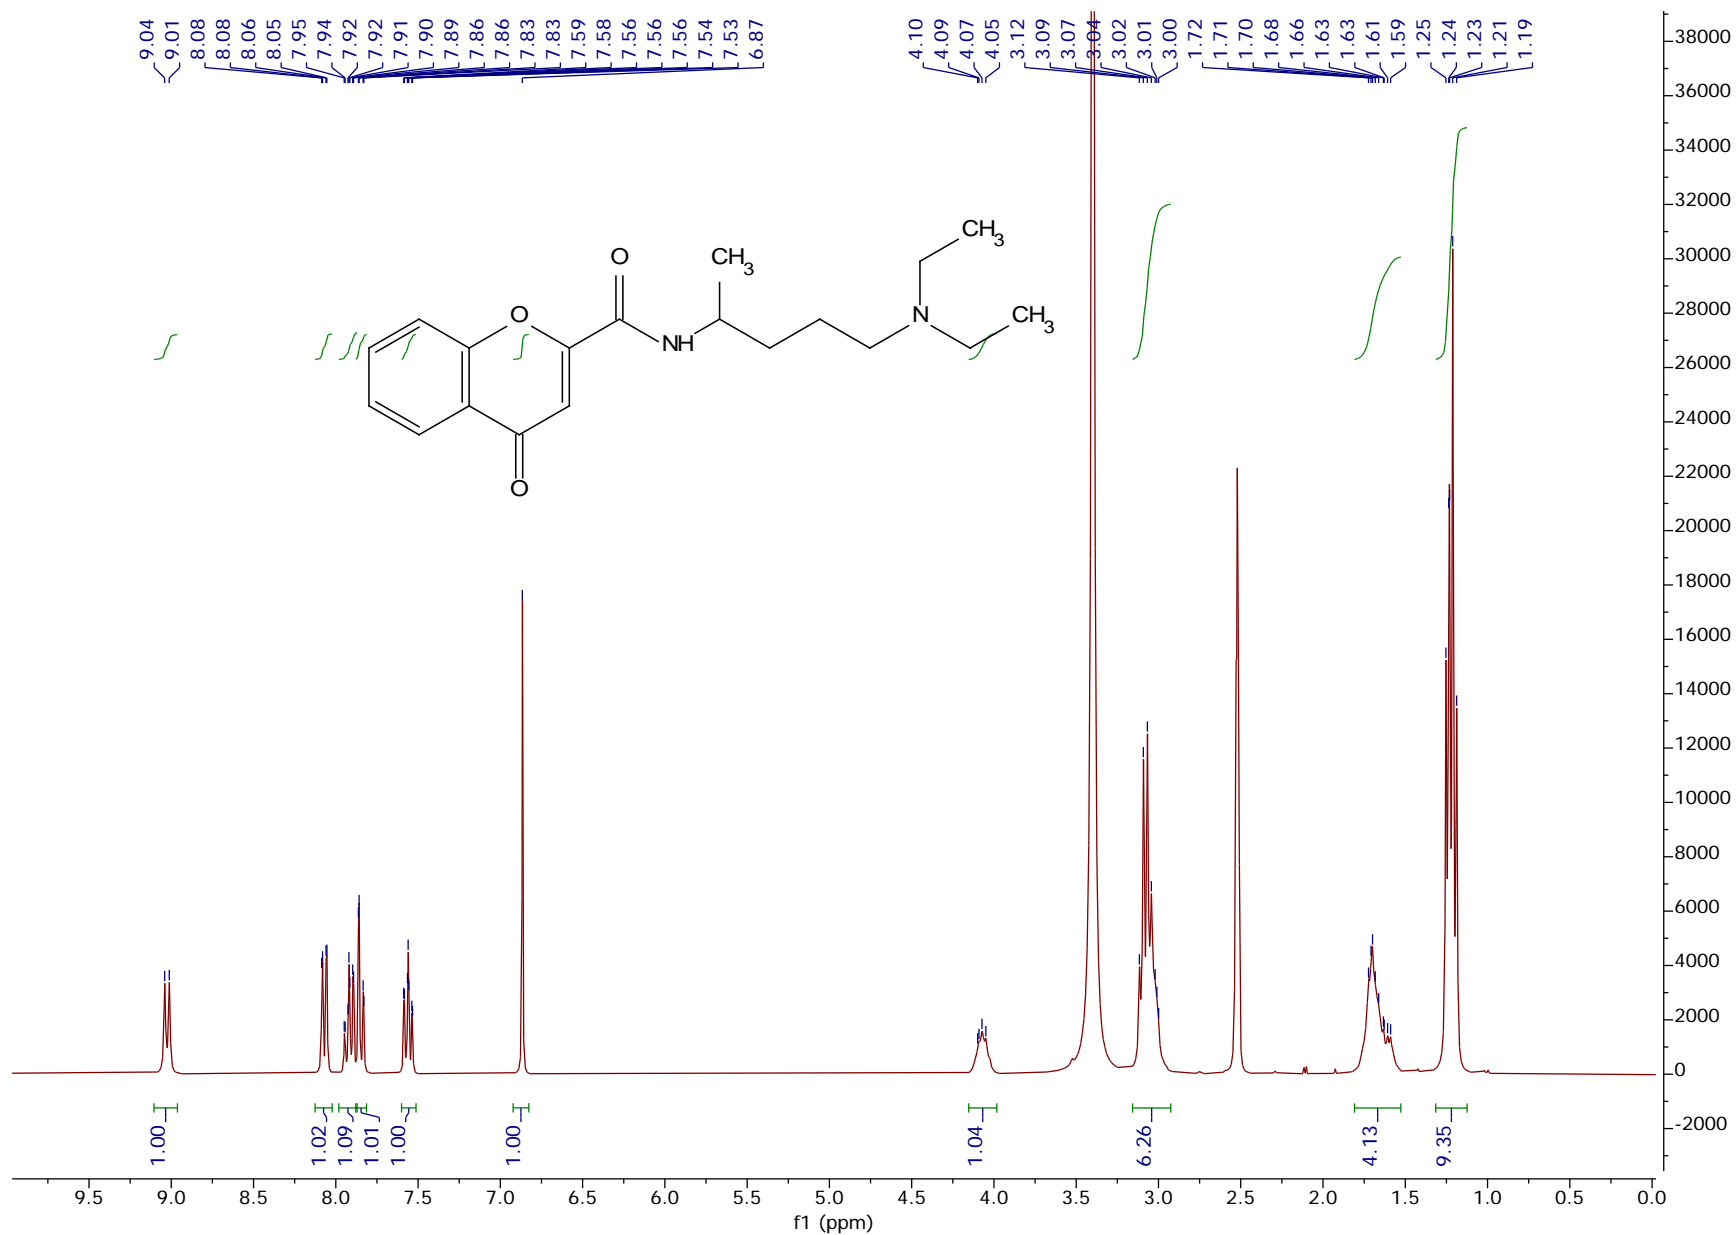

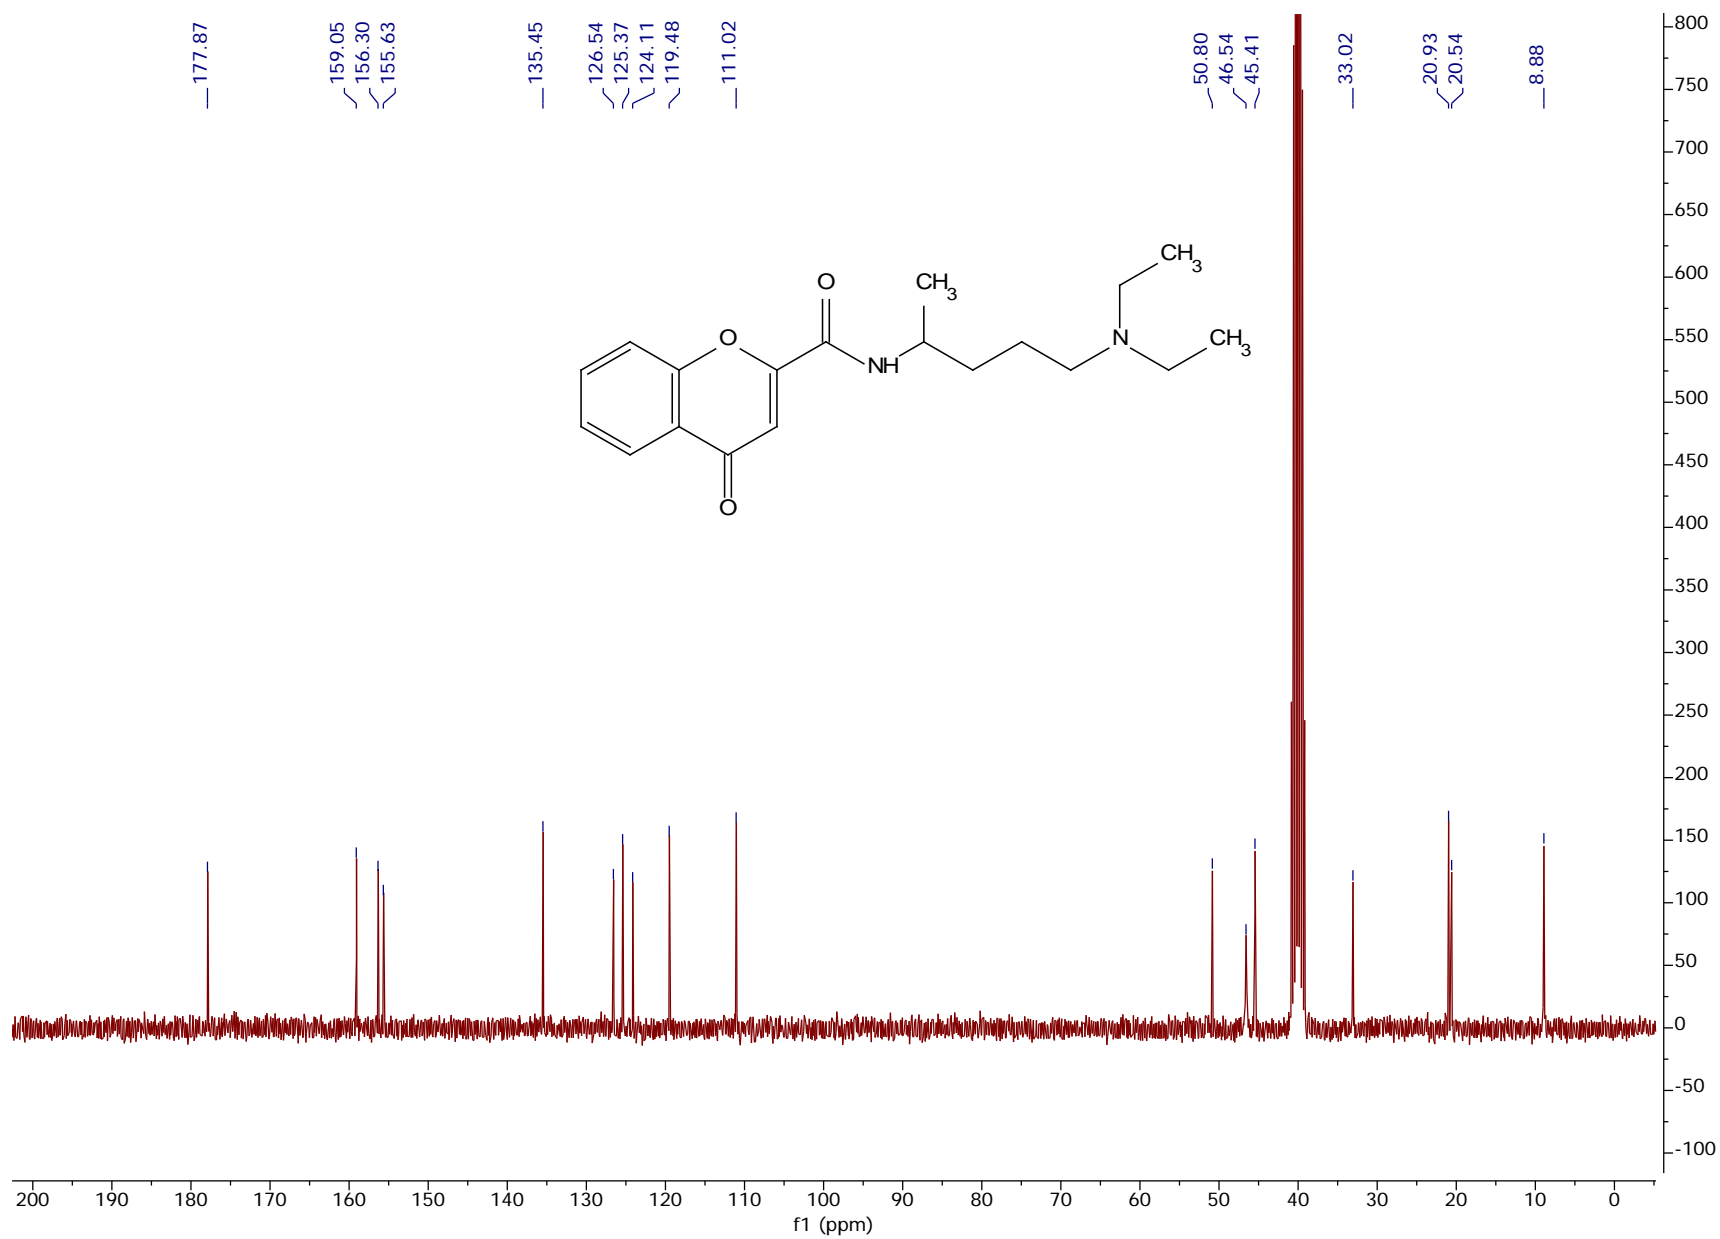

***N*-(3-(1*H*-Imidazol-1-yl)propyl)-4-oxo-4*H*-chromene-2-carboxamide (3'g)**

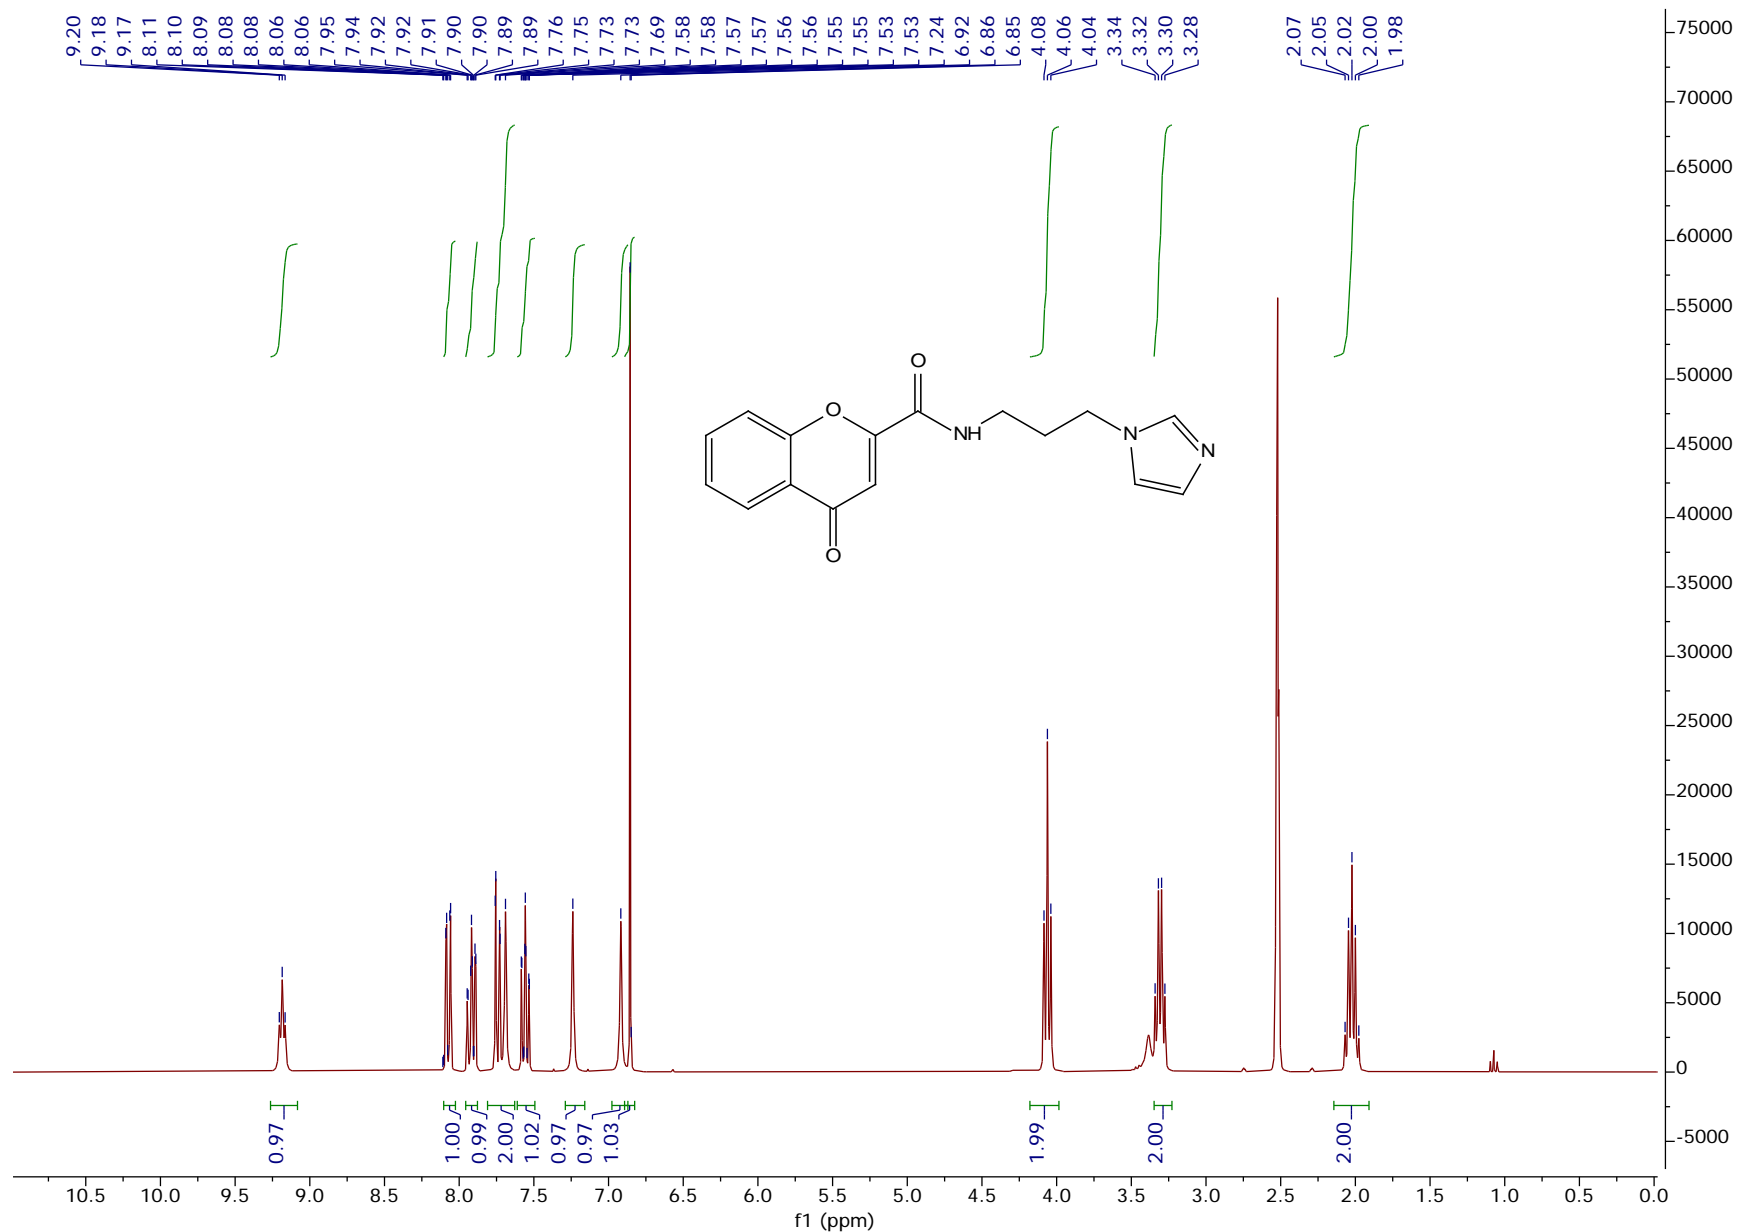

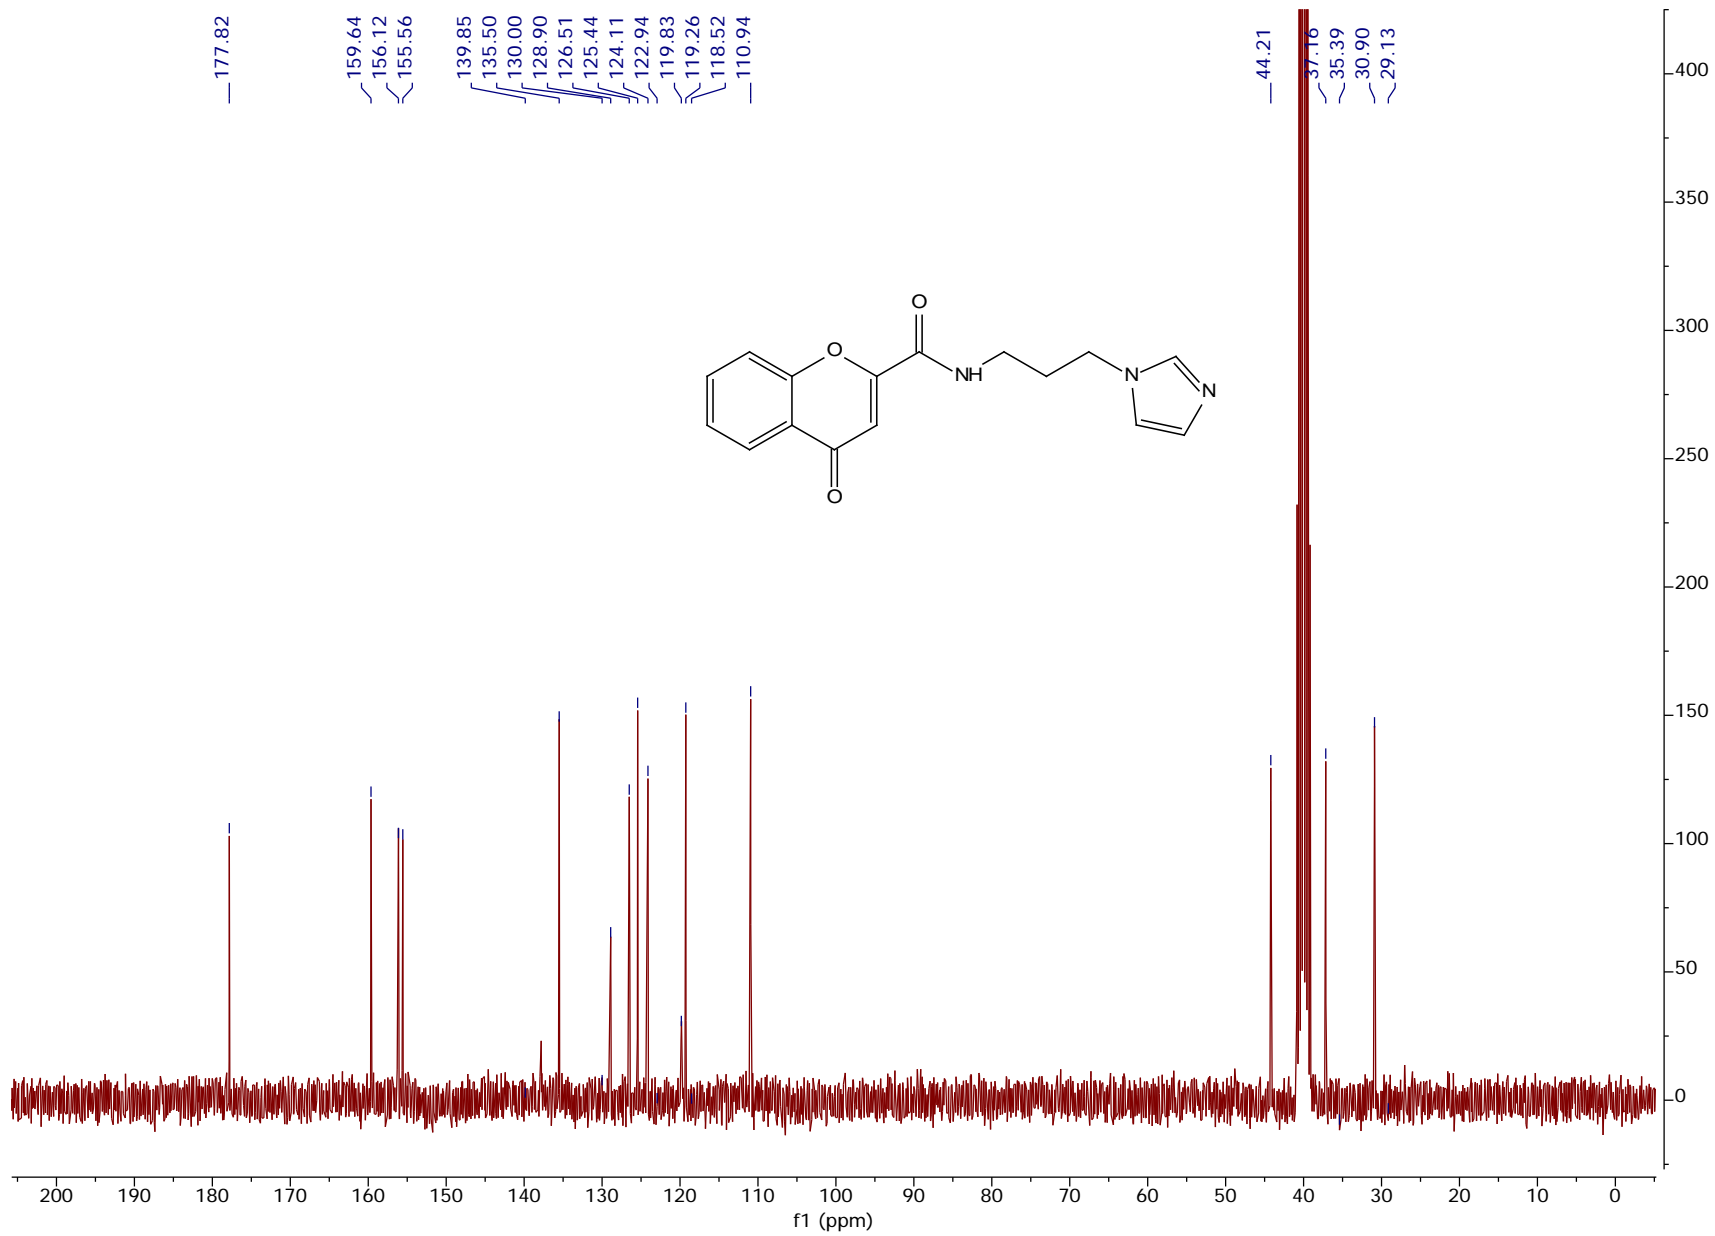

***N*-(4-Oxo-4*H*-chromen-2-yl)benzamide (6a)**

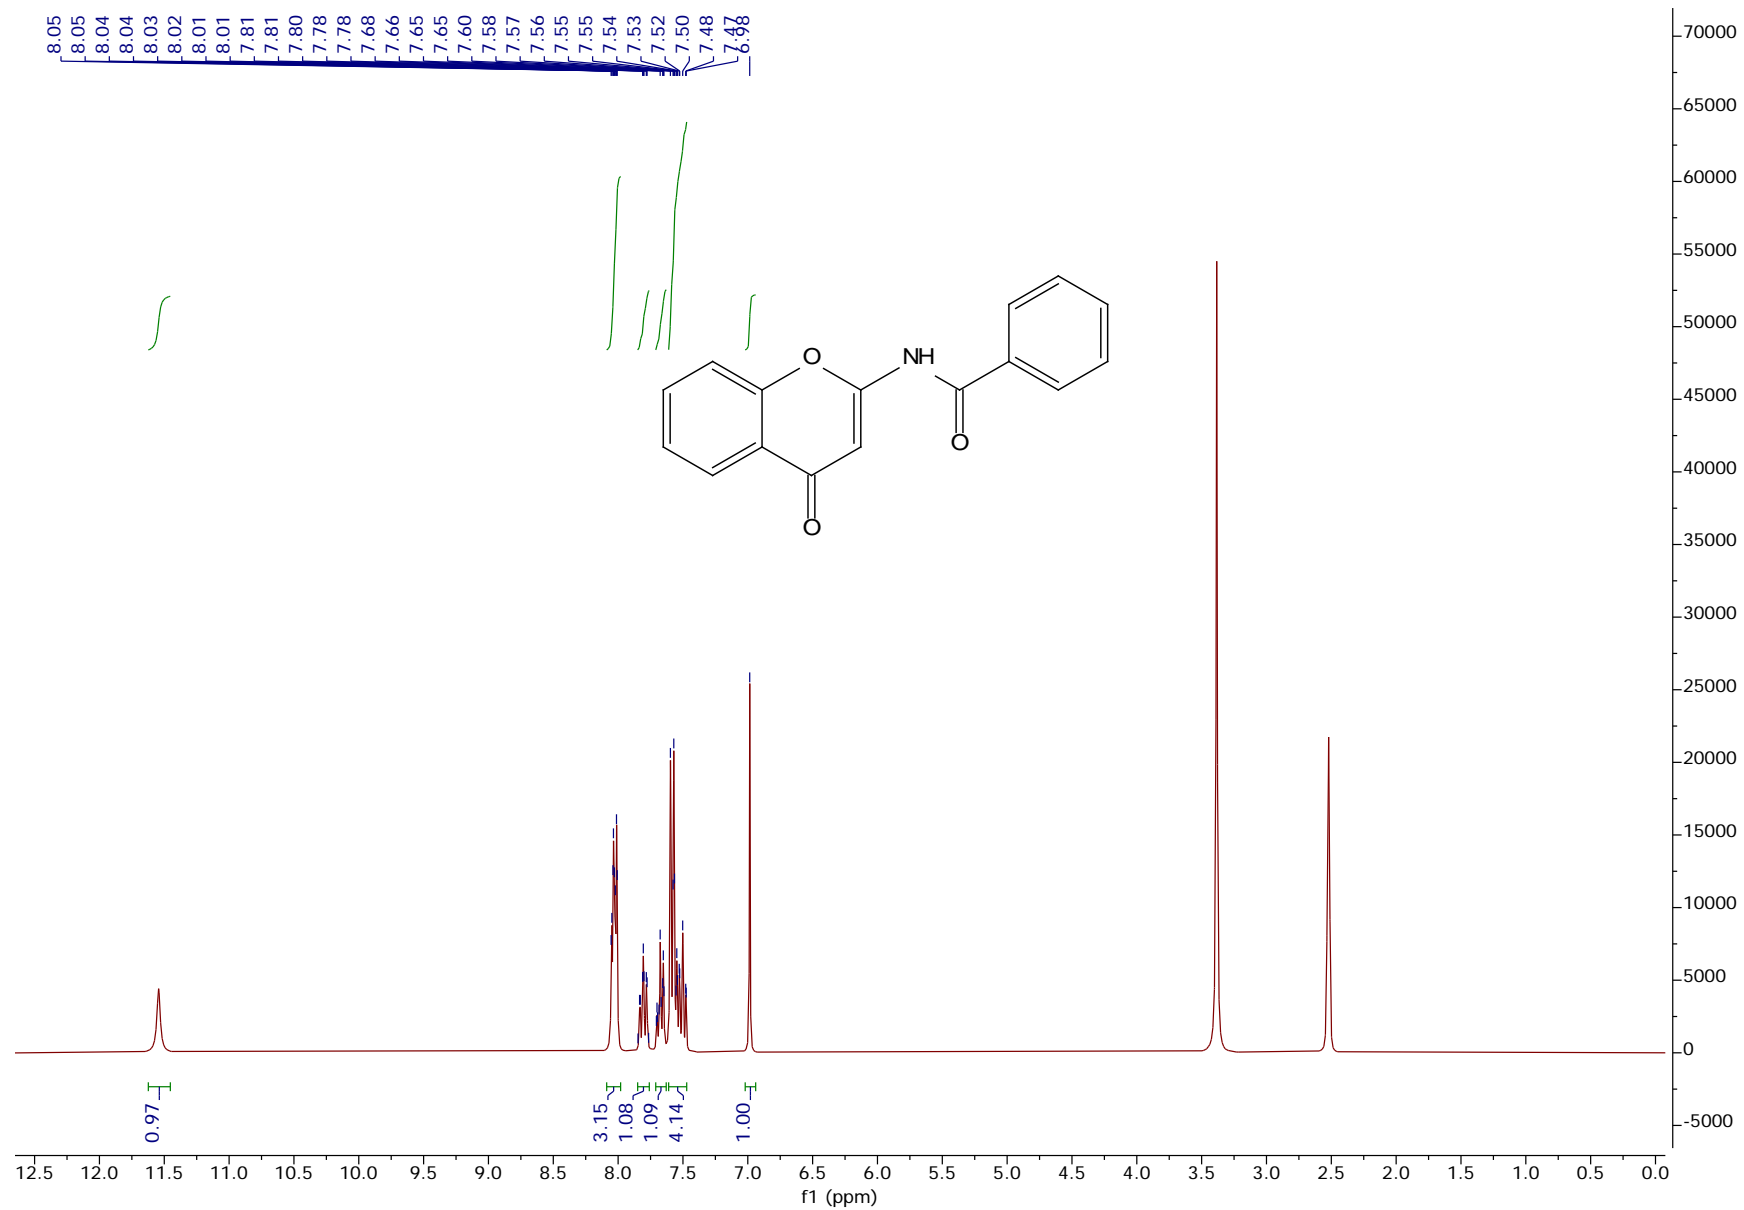

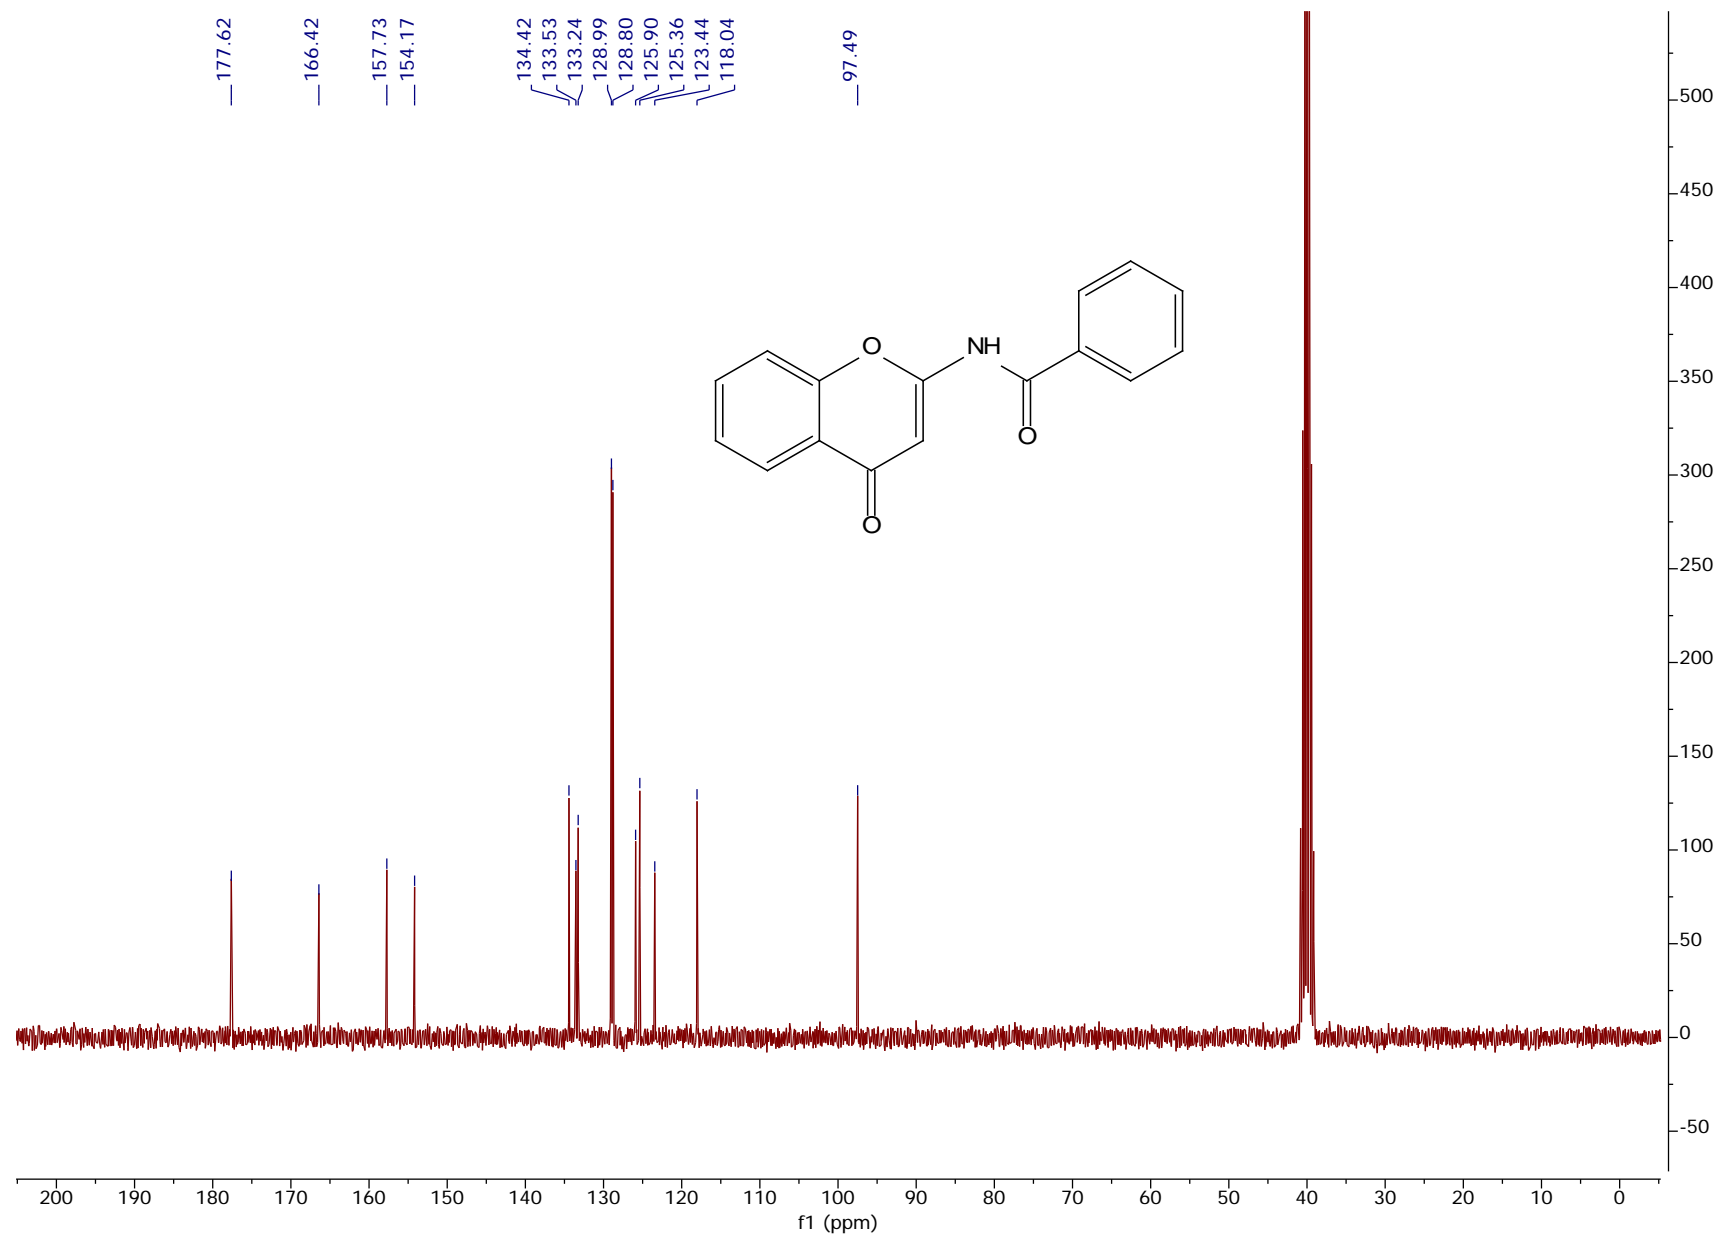



4-Methyl-*N*-(4-oxo-4*H*-chromen-2-yl)benzamide (6b)

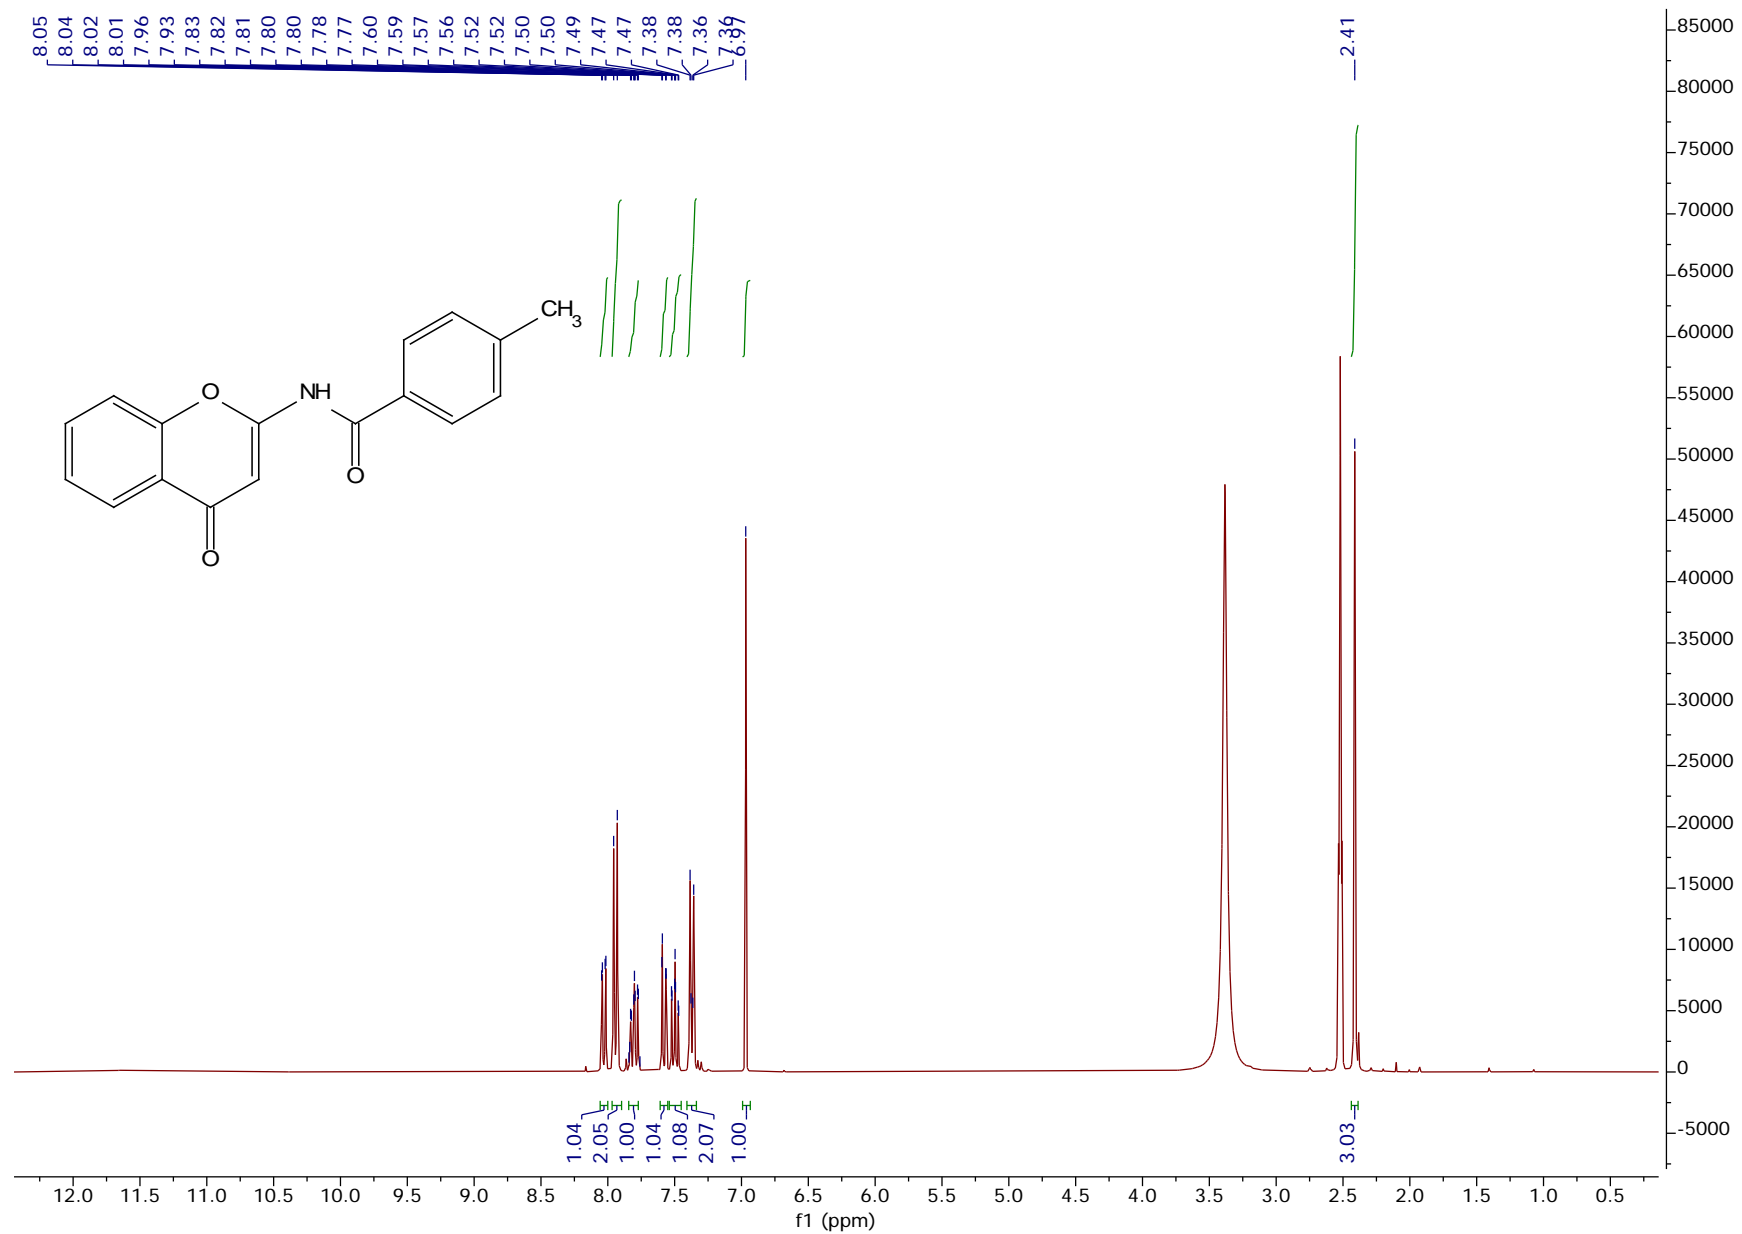

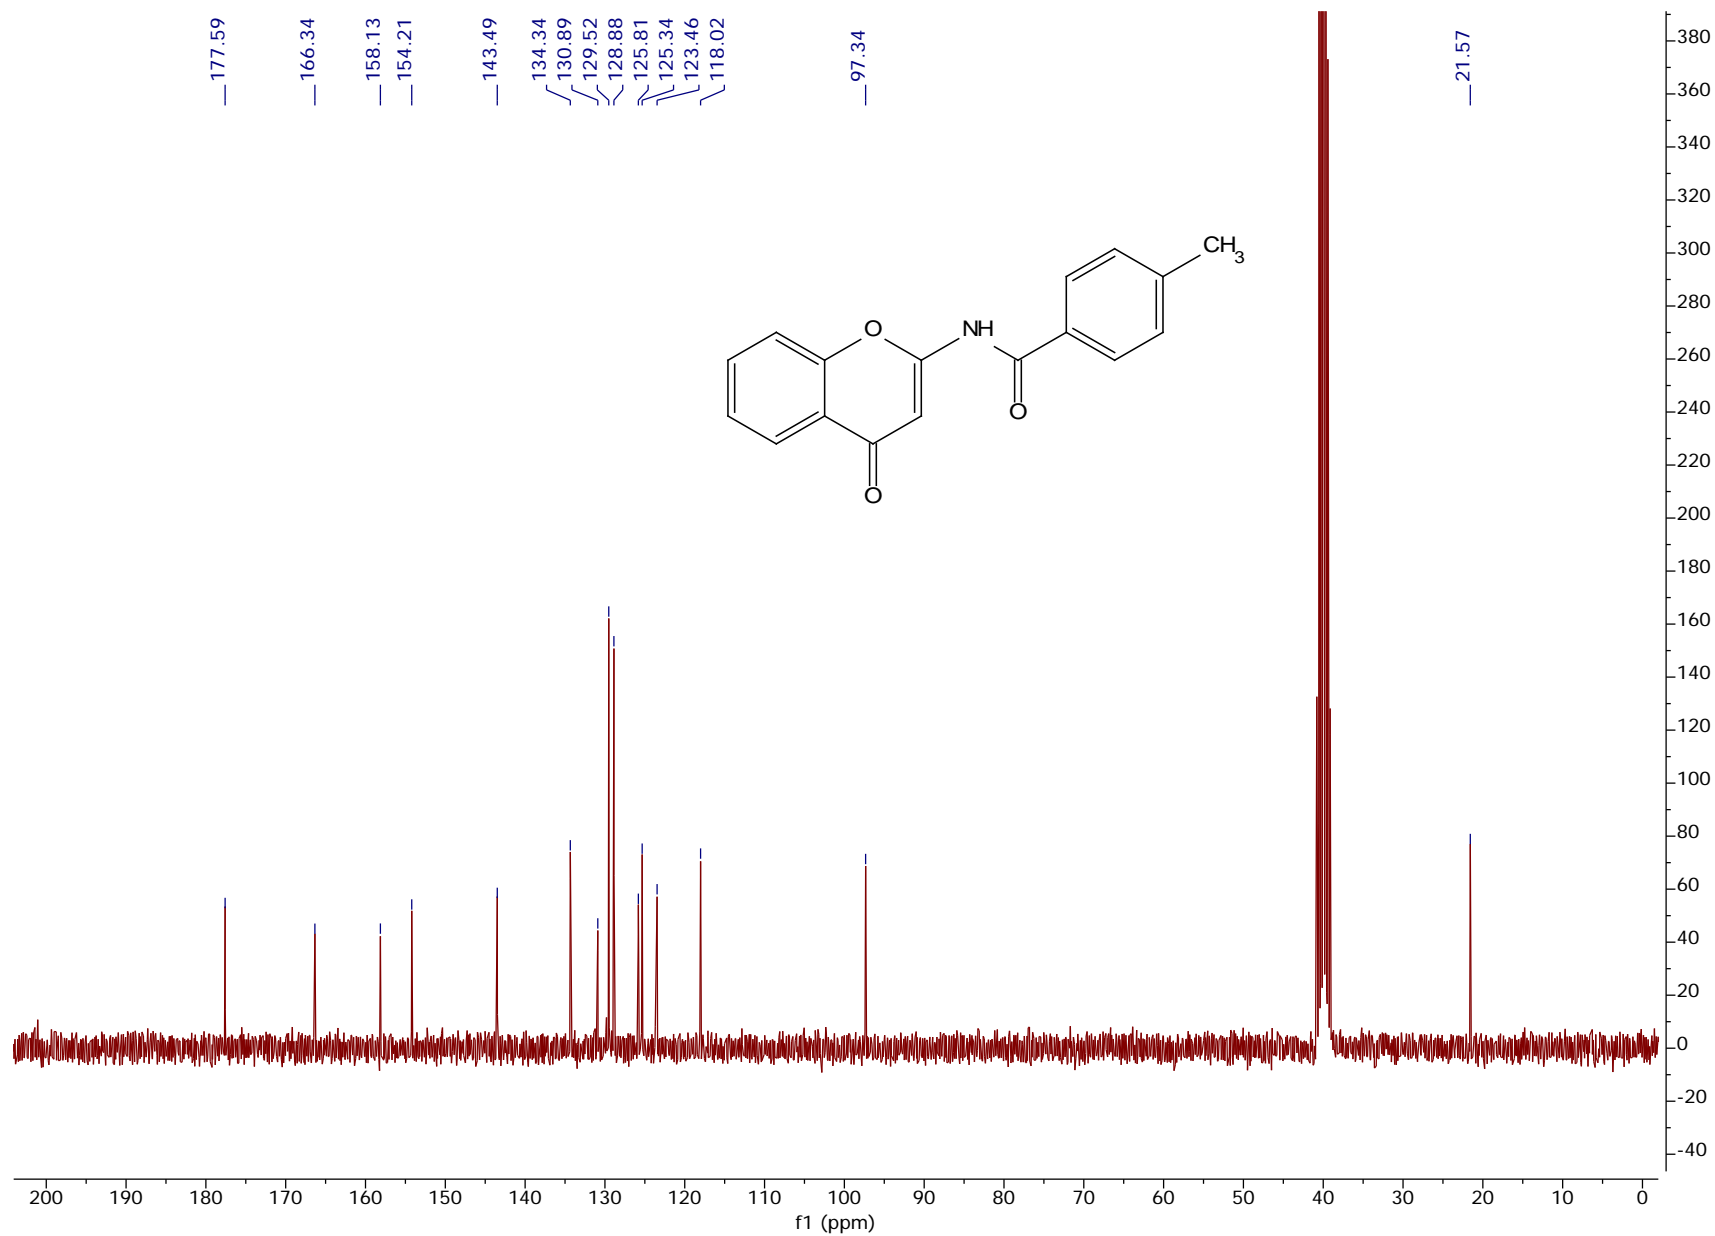

4-Ethyl-N-(4-oxo-4H-chromen-2-yl)benzamide (6c)

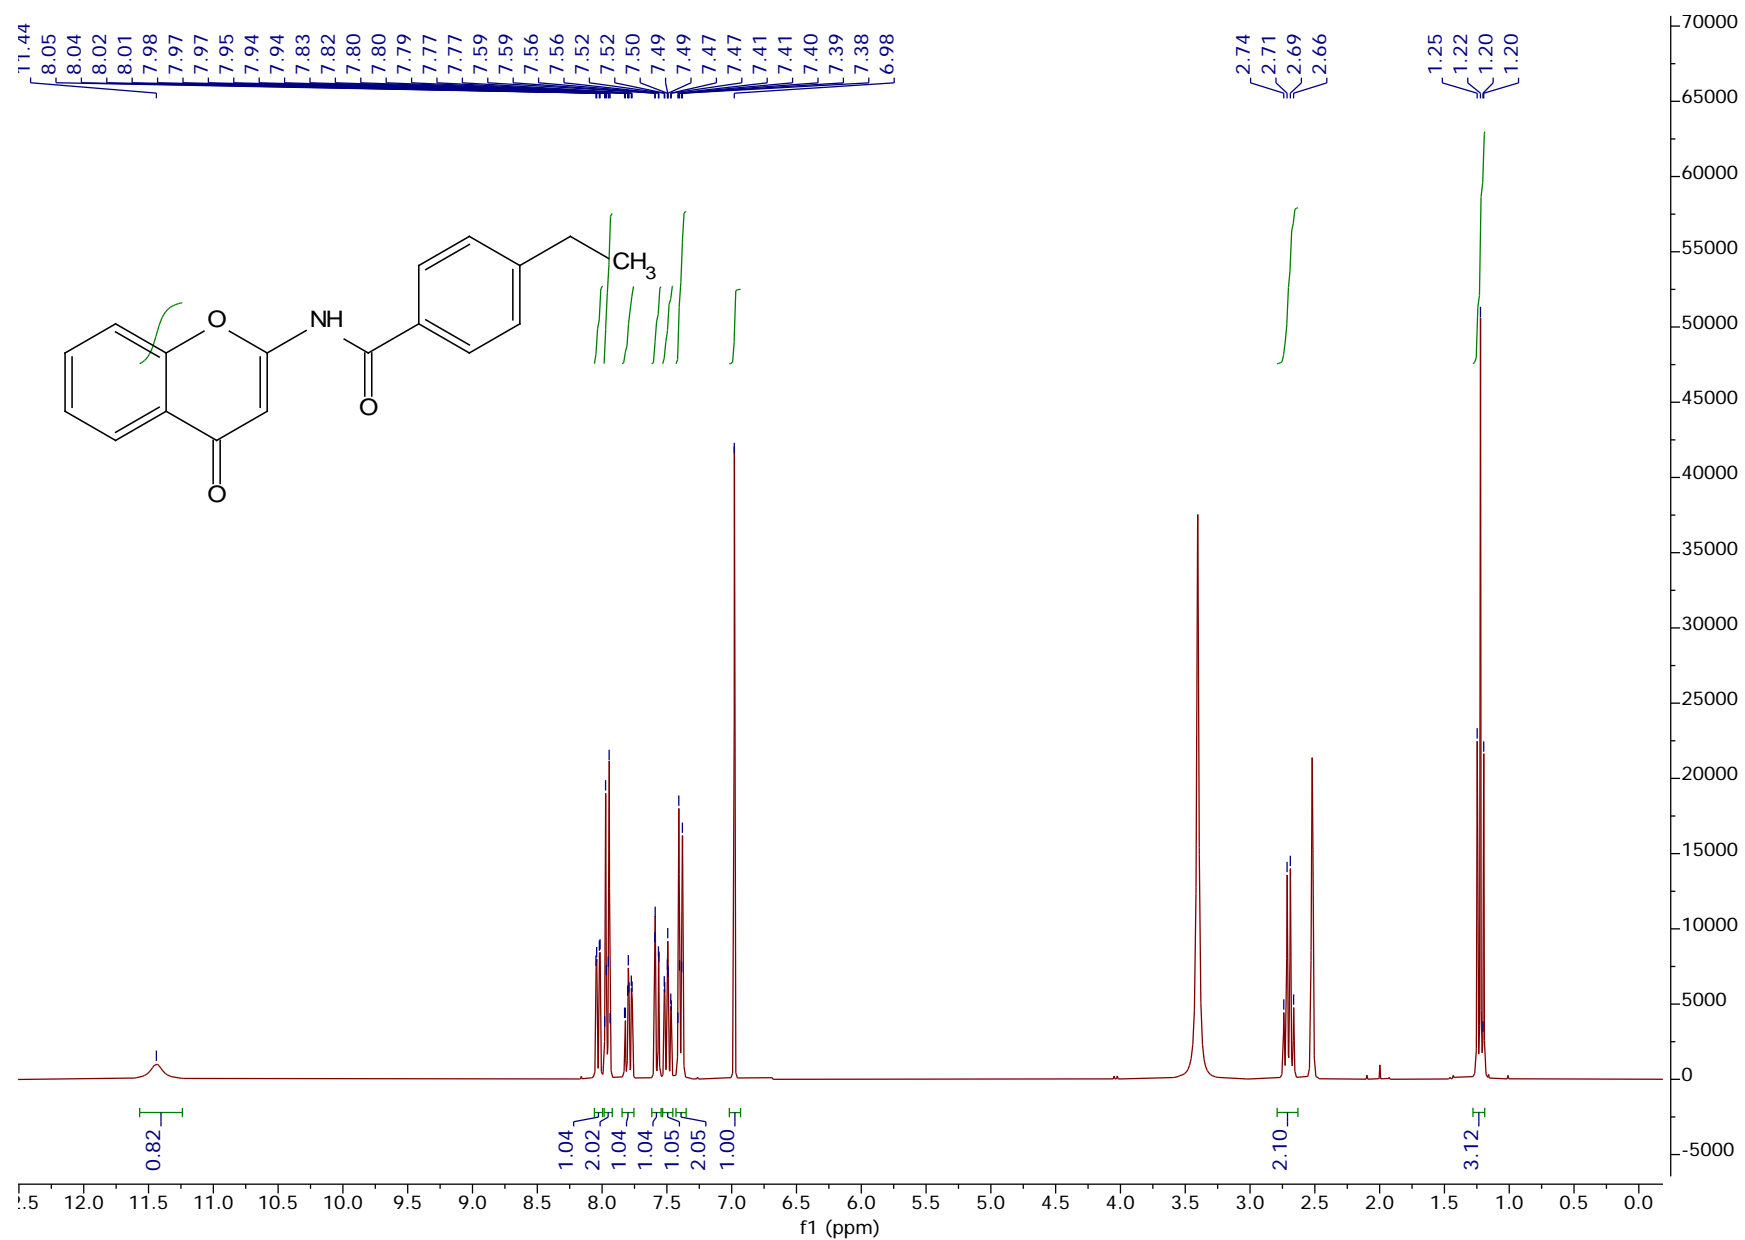

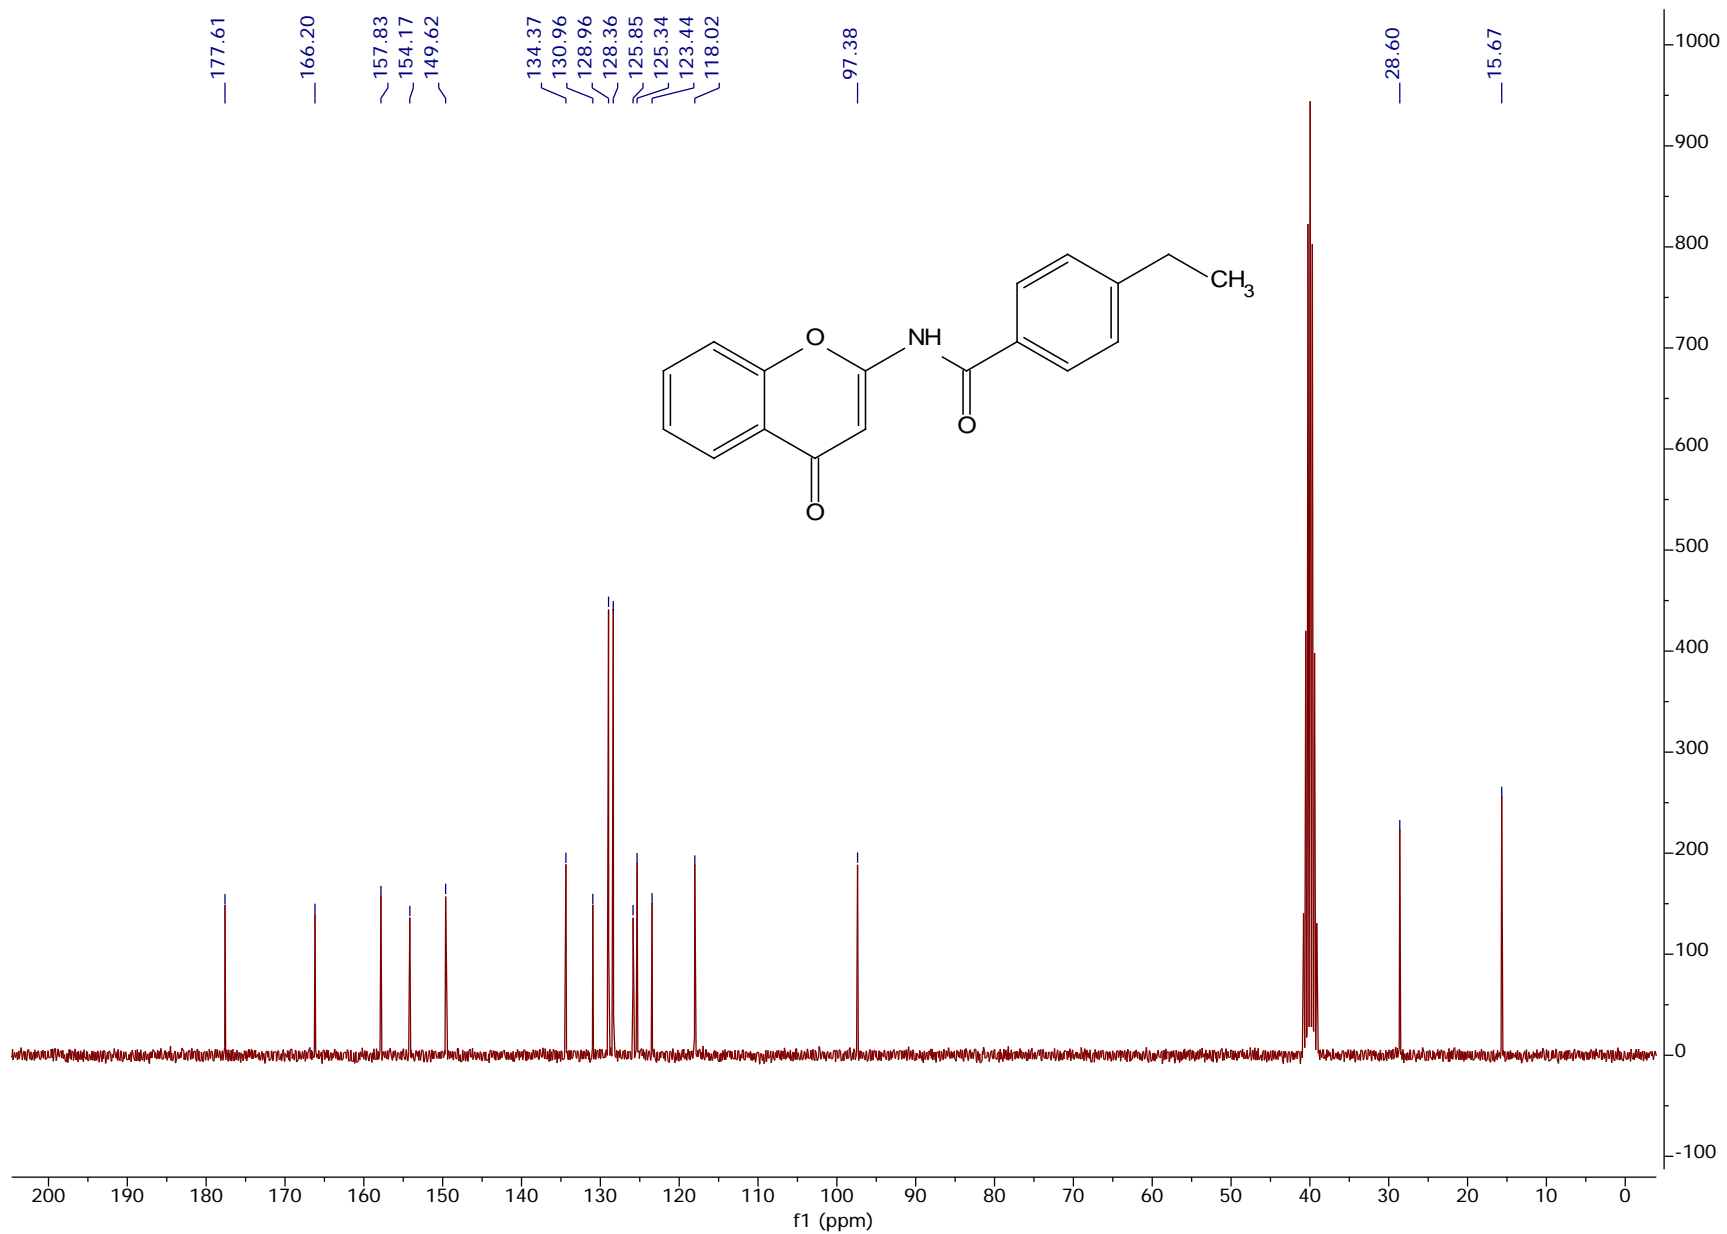

***N*-(4-Oxo-4*H*-chromen-2-yl)-4-propylbenzamide (6d)**

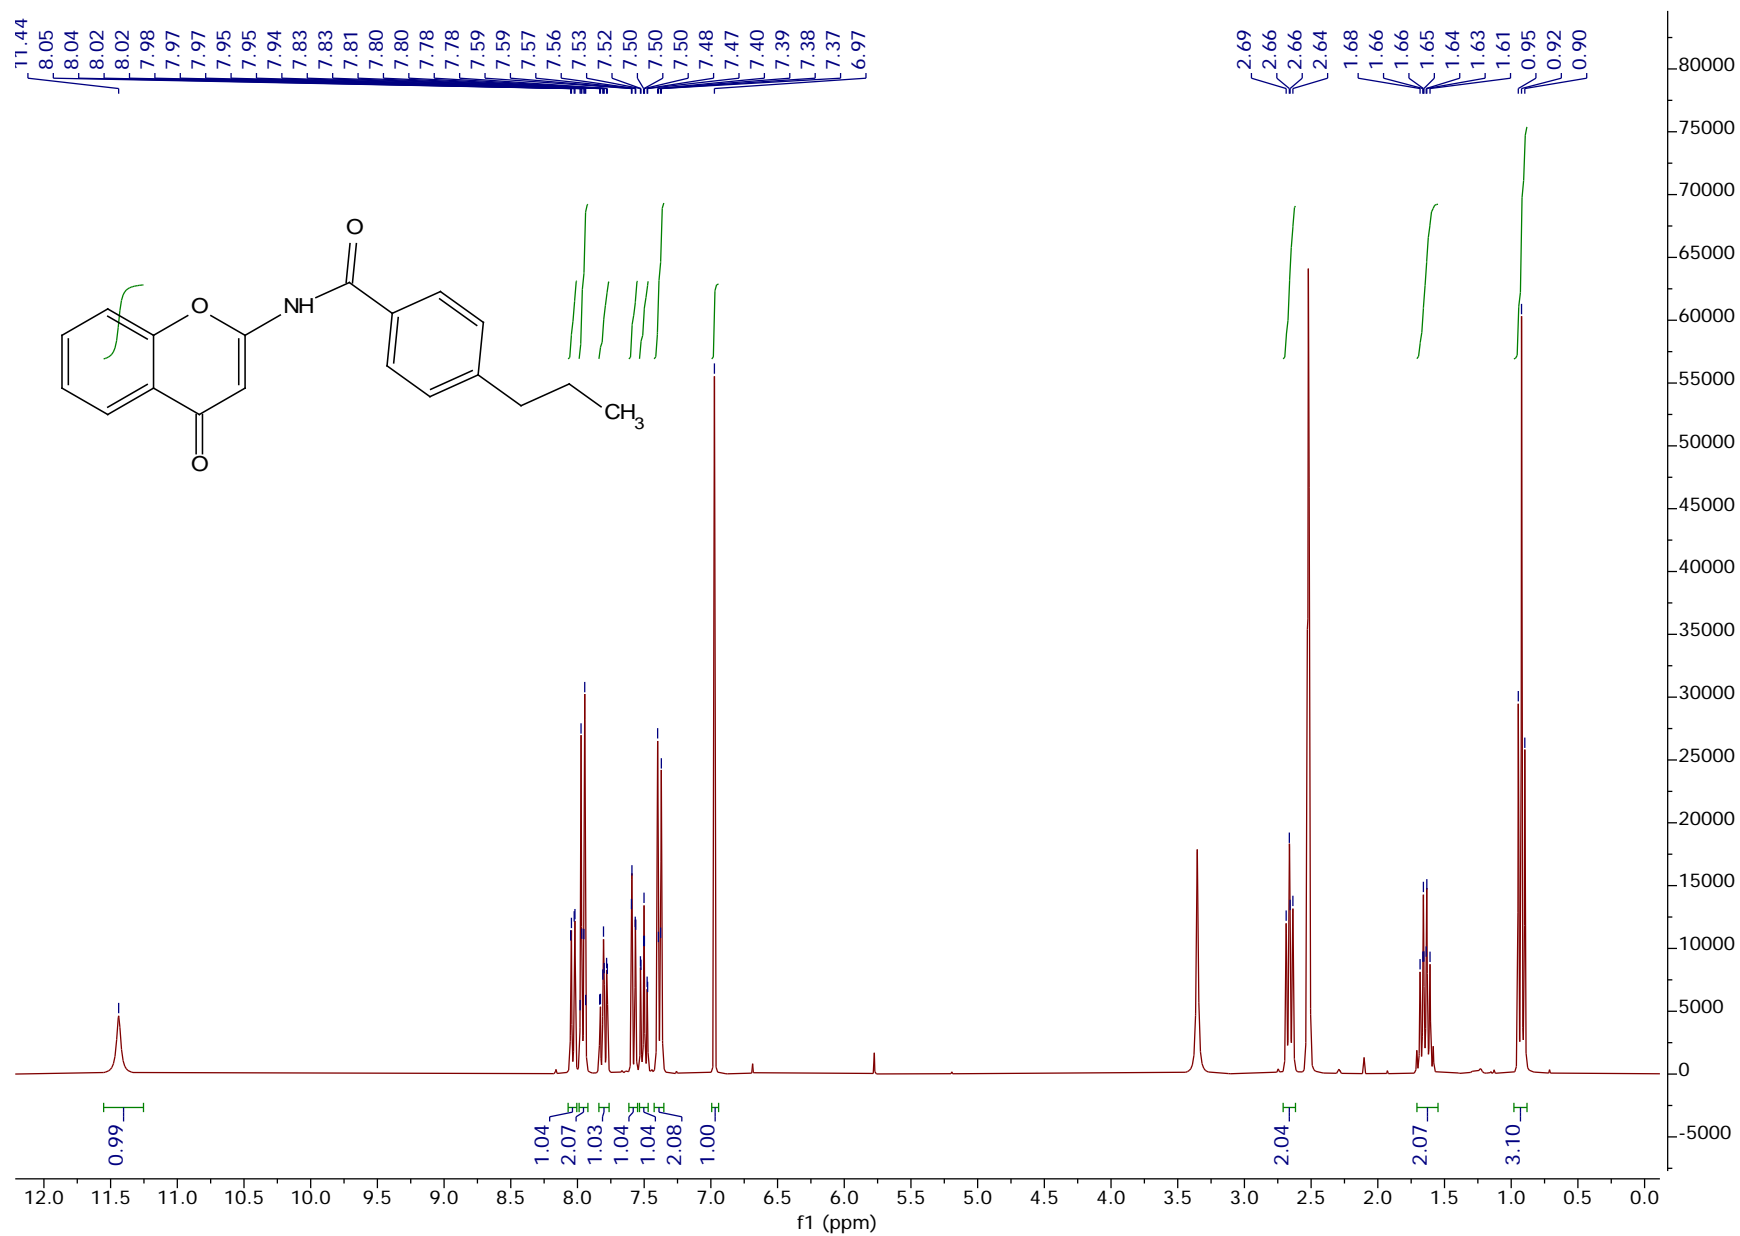

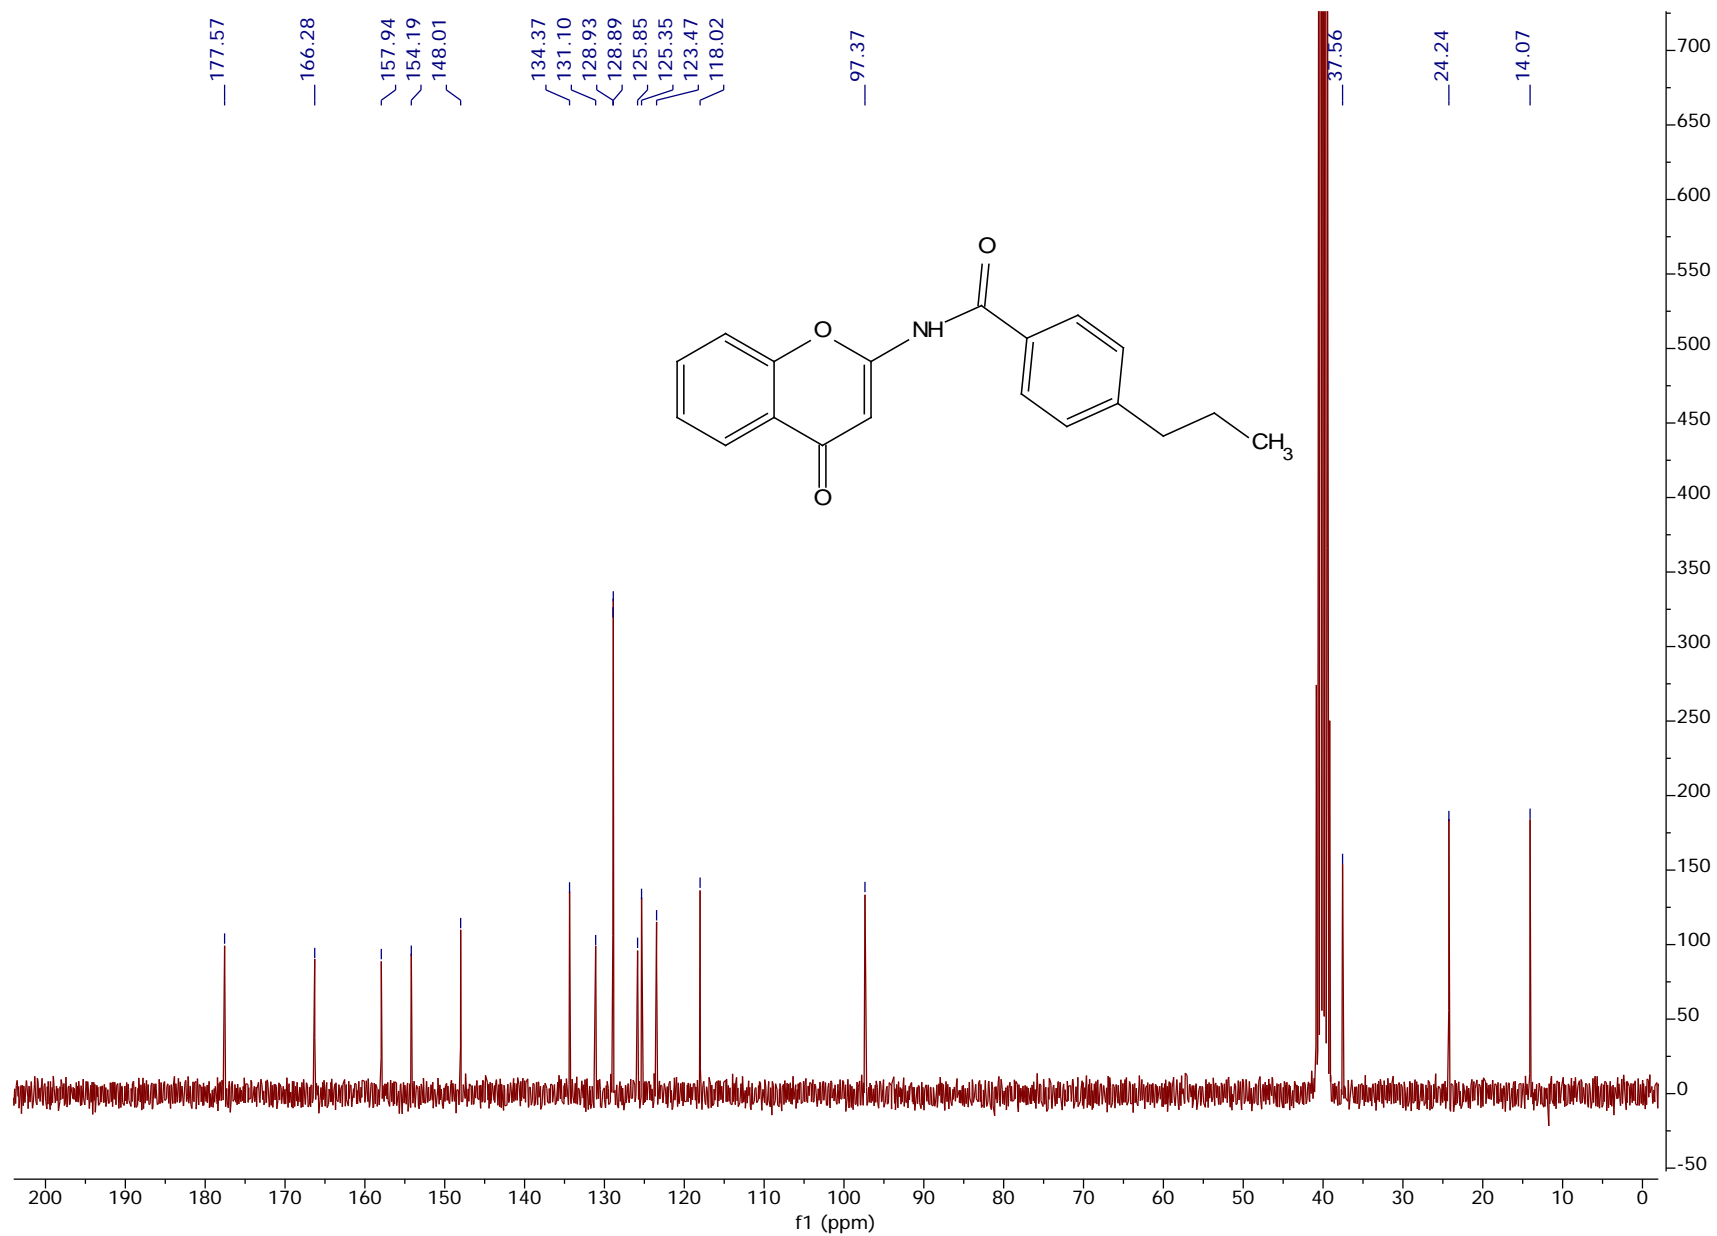

4-Fluoro-N-(4-oxo-4H-chromen-2-yl)benzamide (6e)

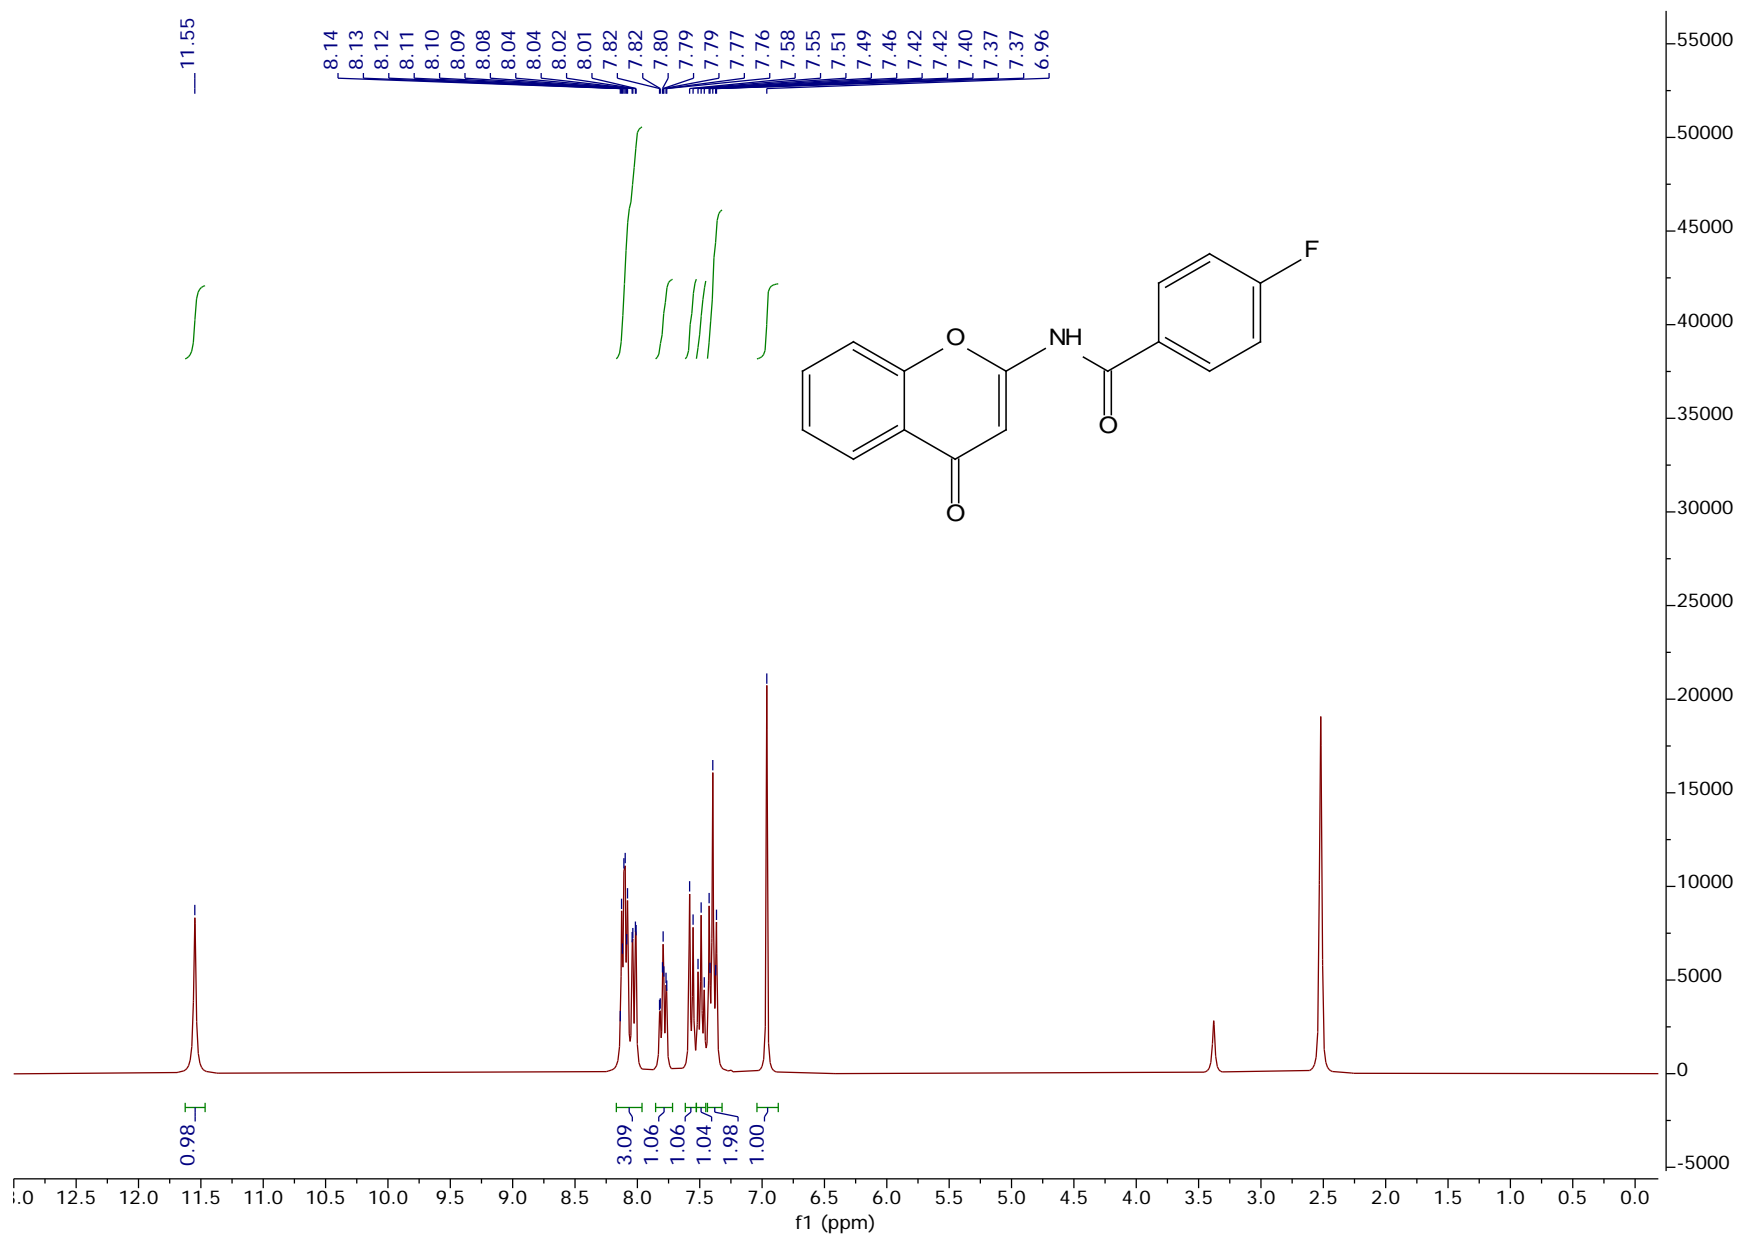

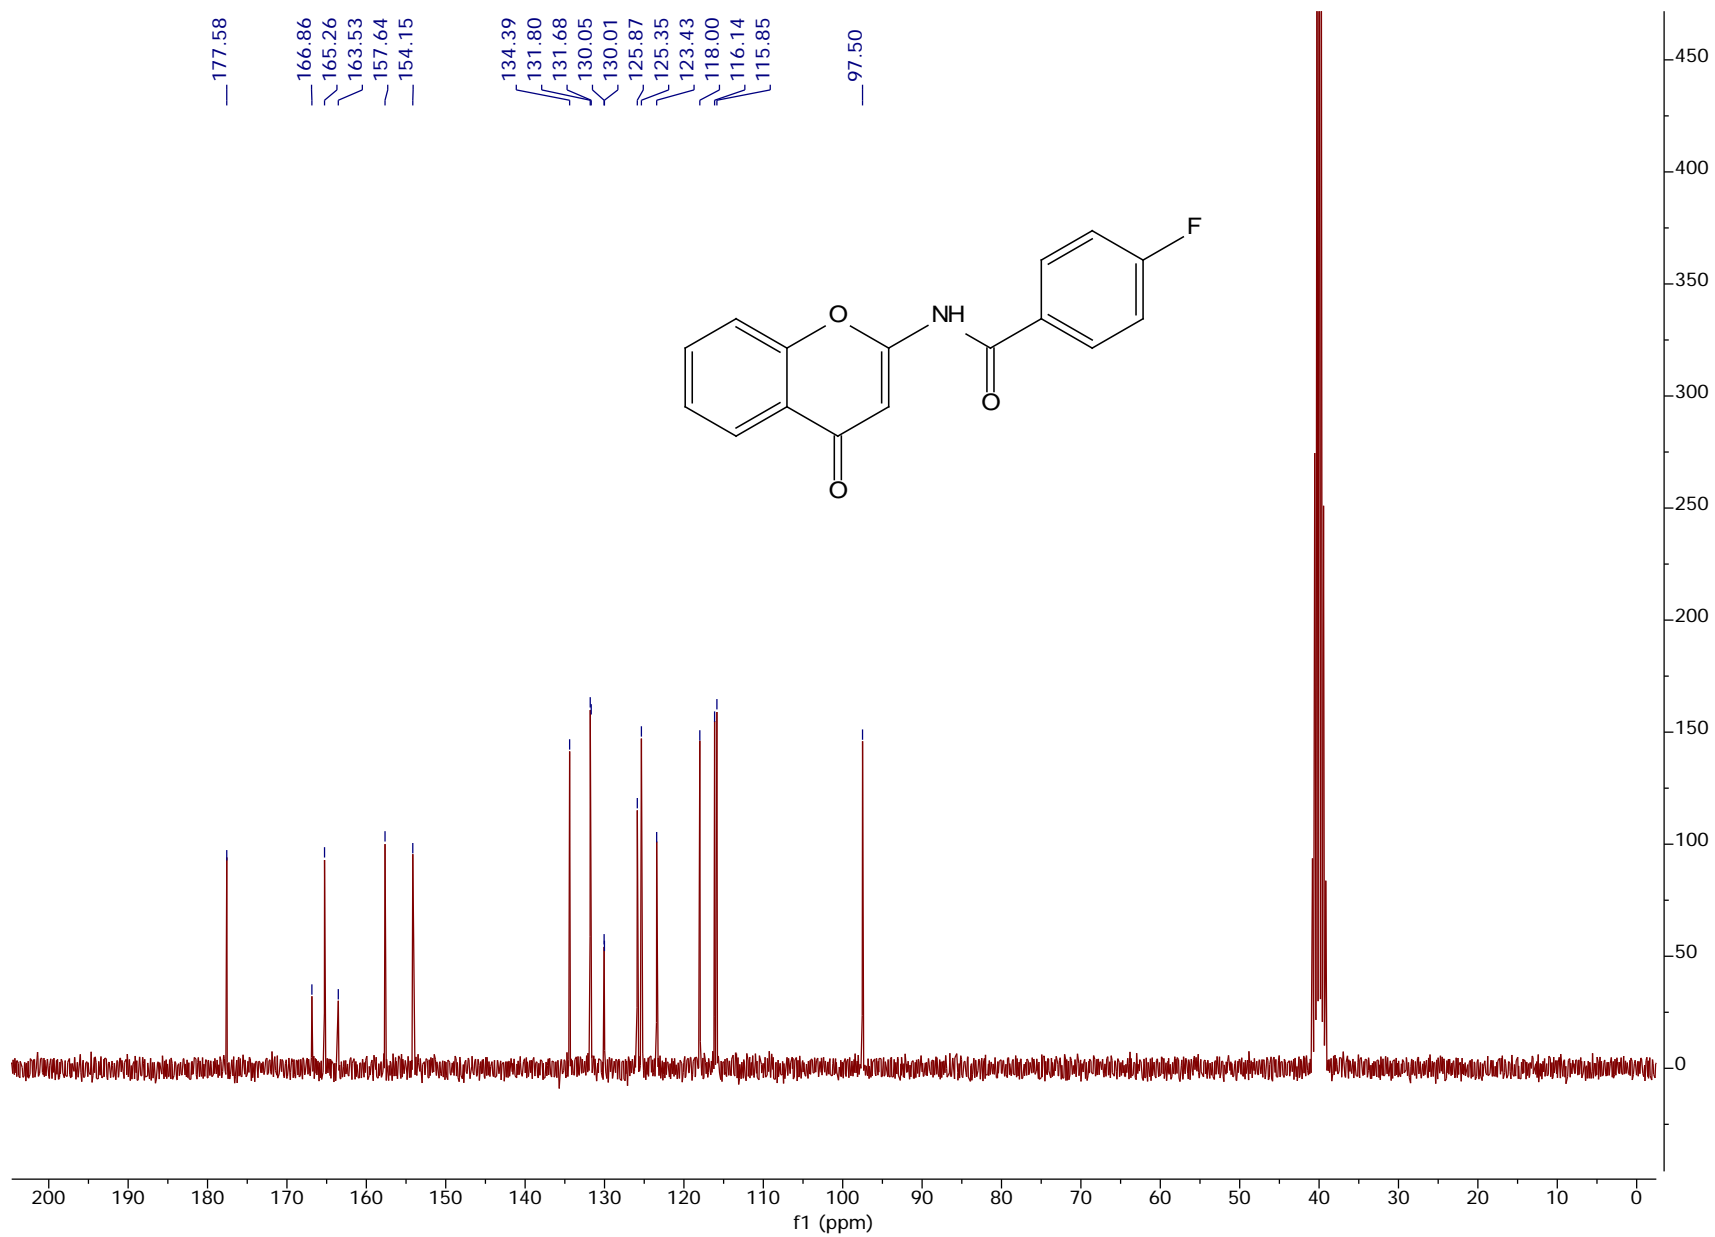



4-Chloro-*N*-(4-oxo-4*H*-chromen-2-yl)benzamide (6f)

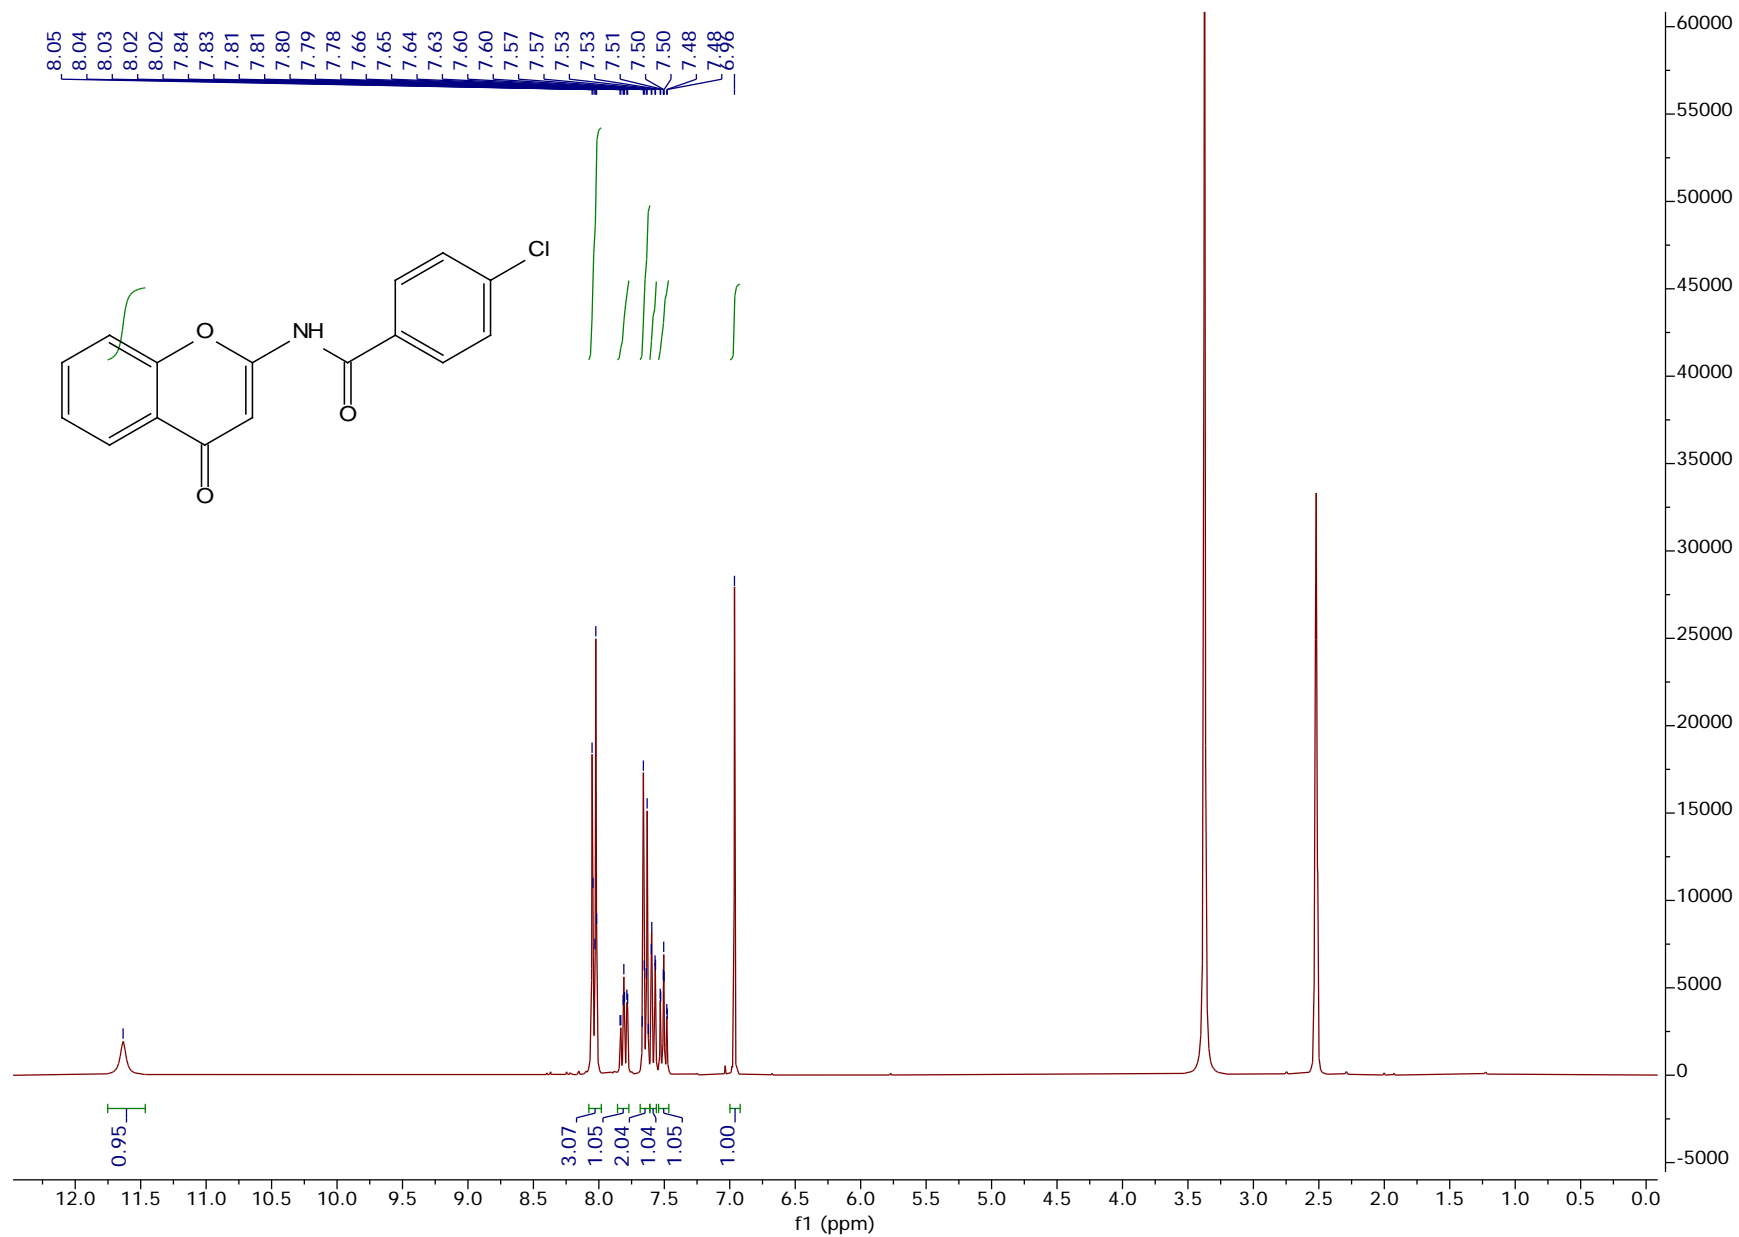

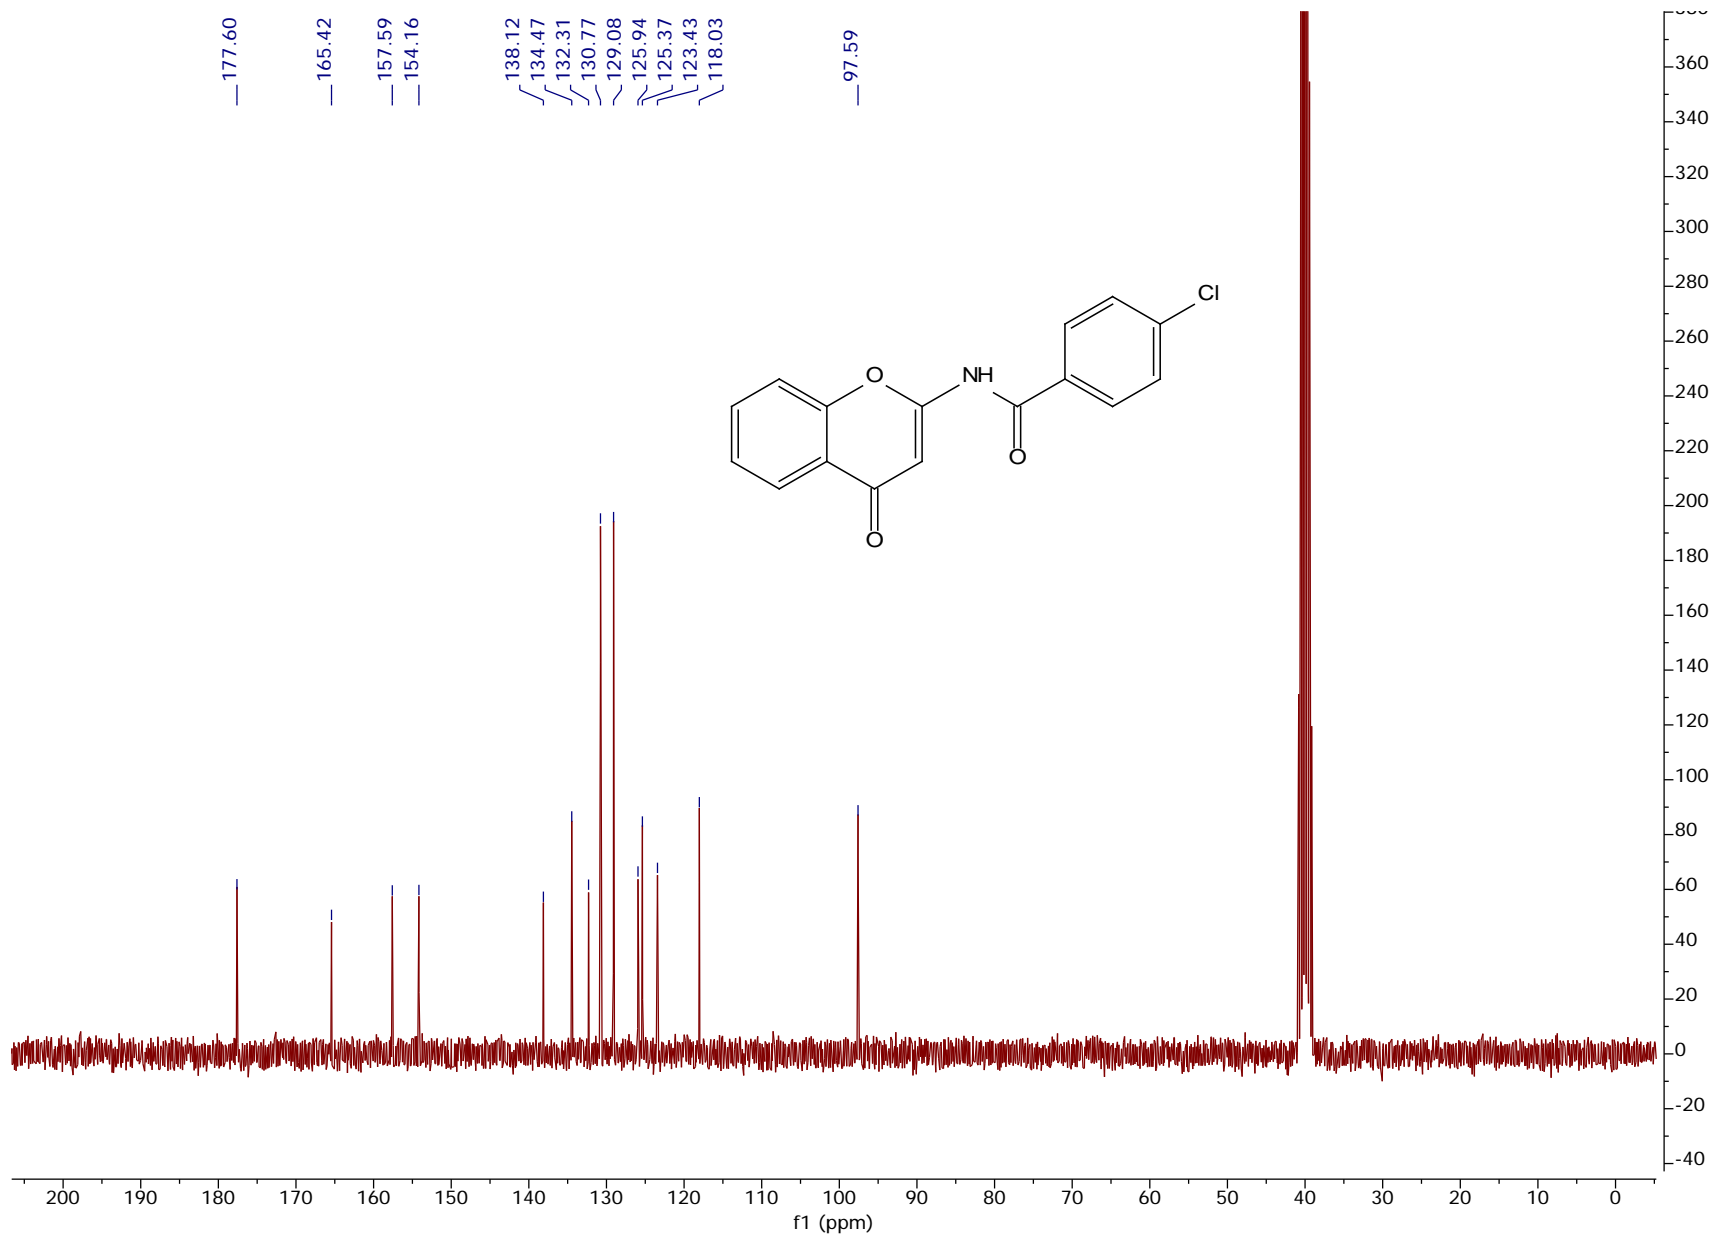

4-Bromo-N-(4-oxo-4H-chromen-2-yl)benzamide (6g)

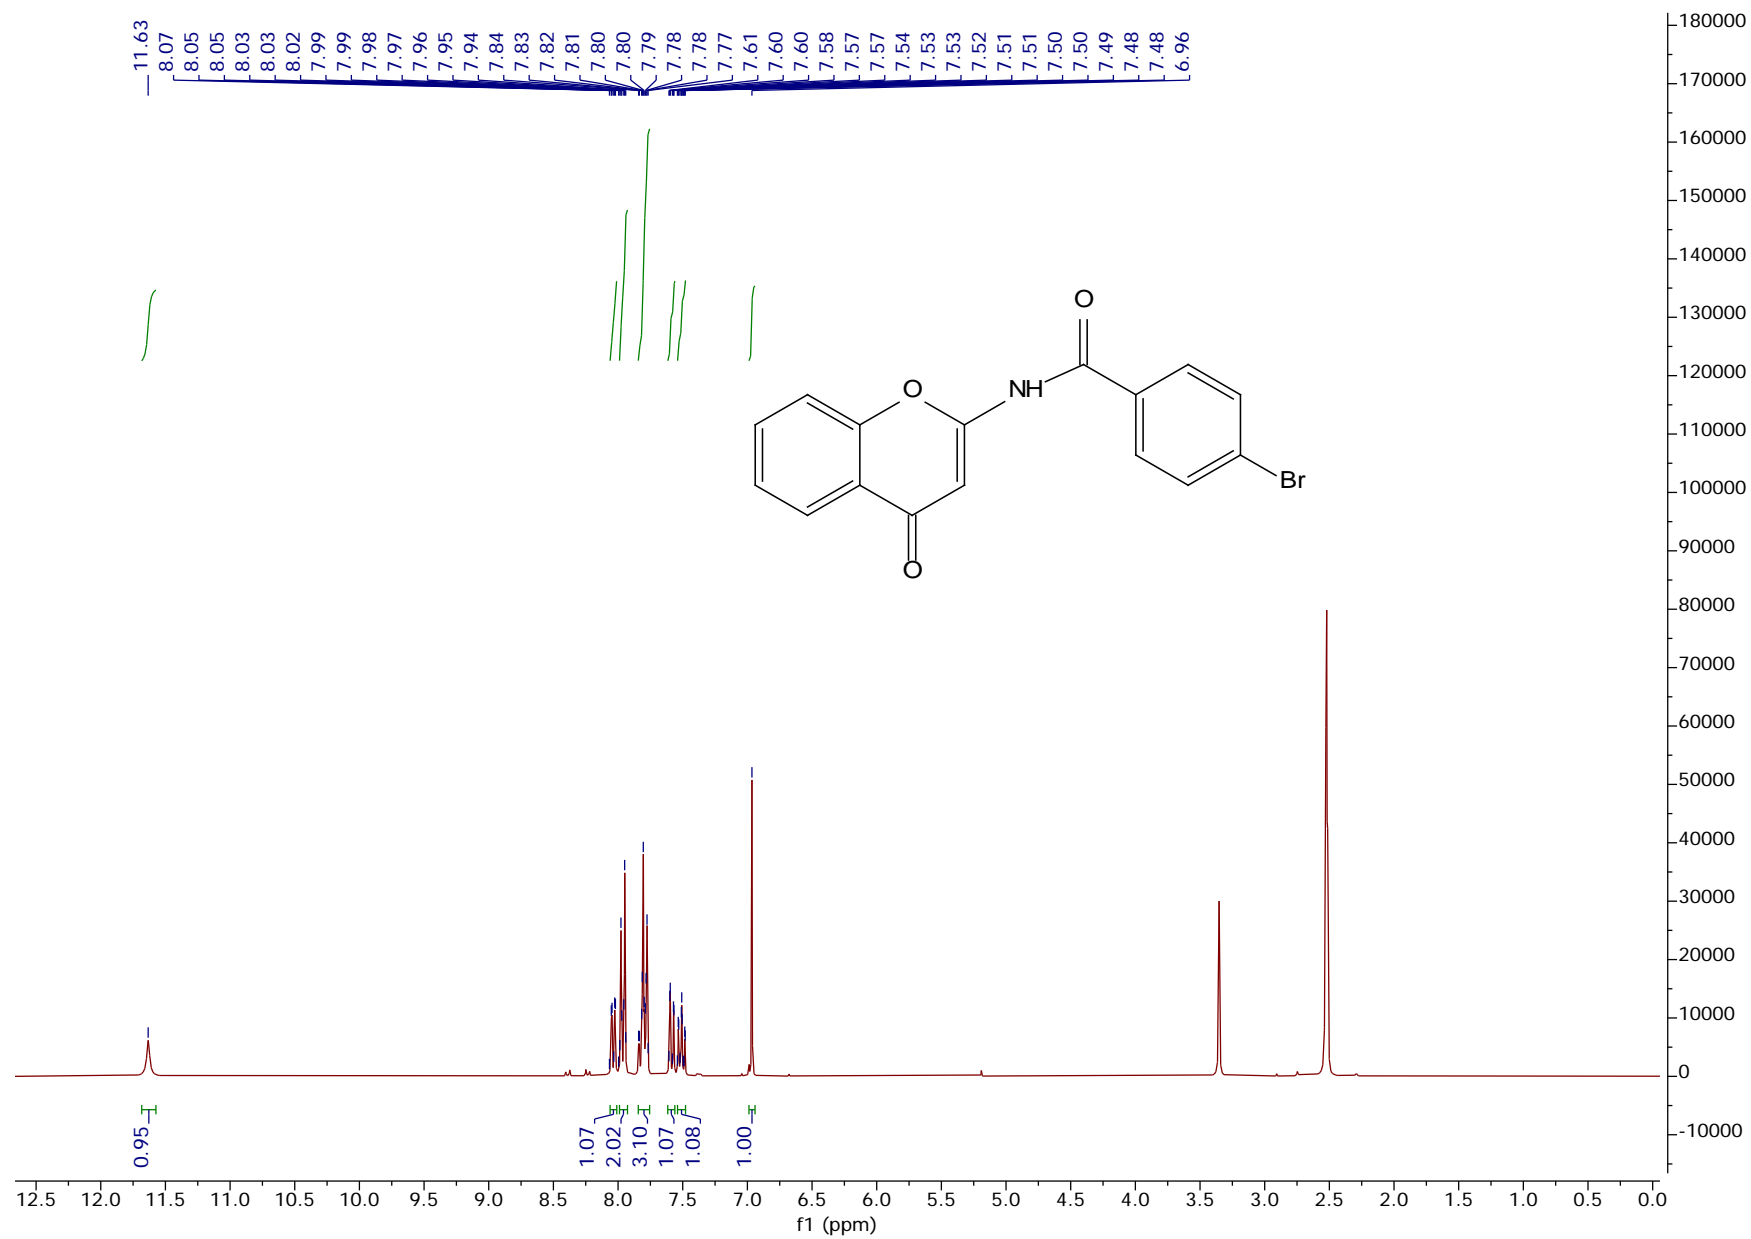

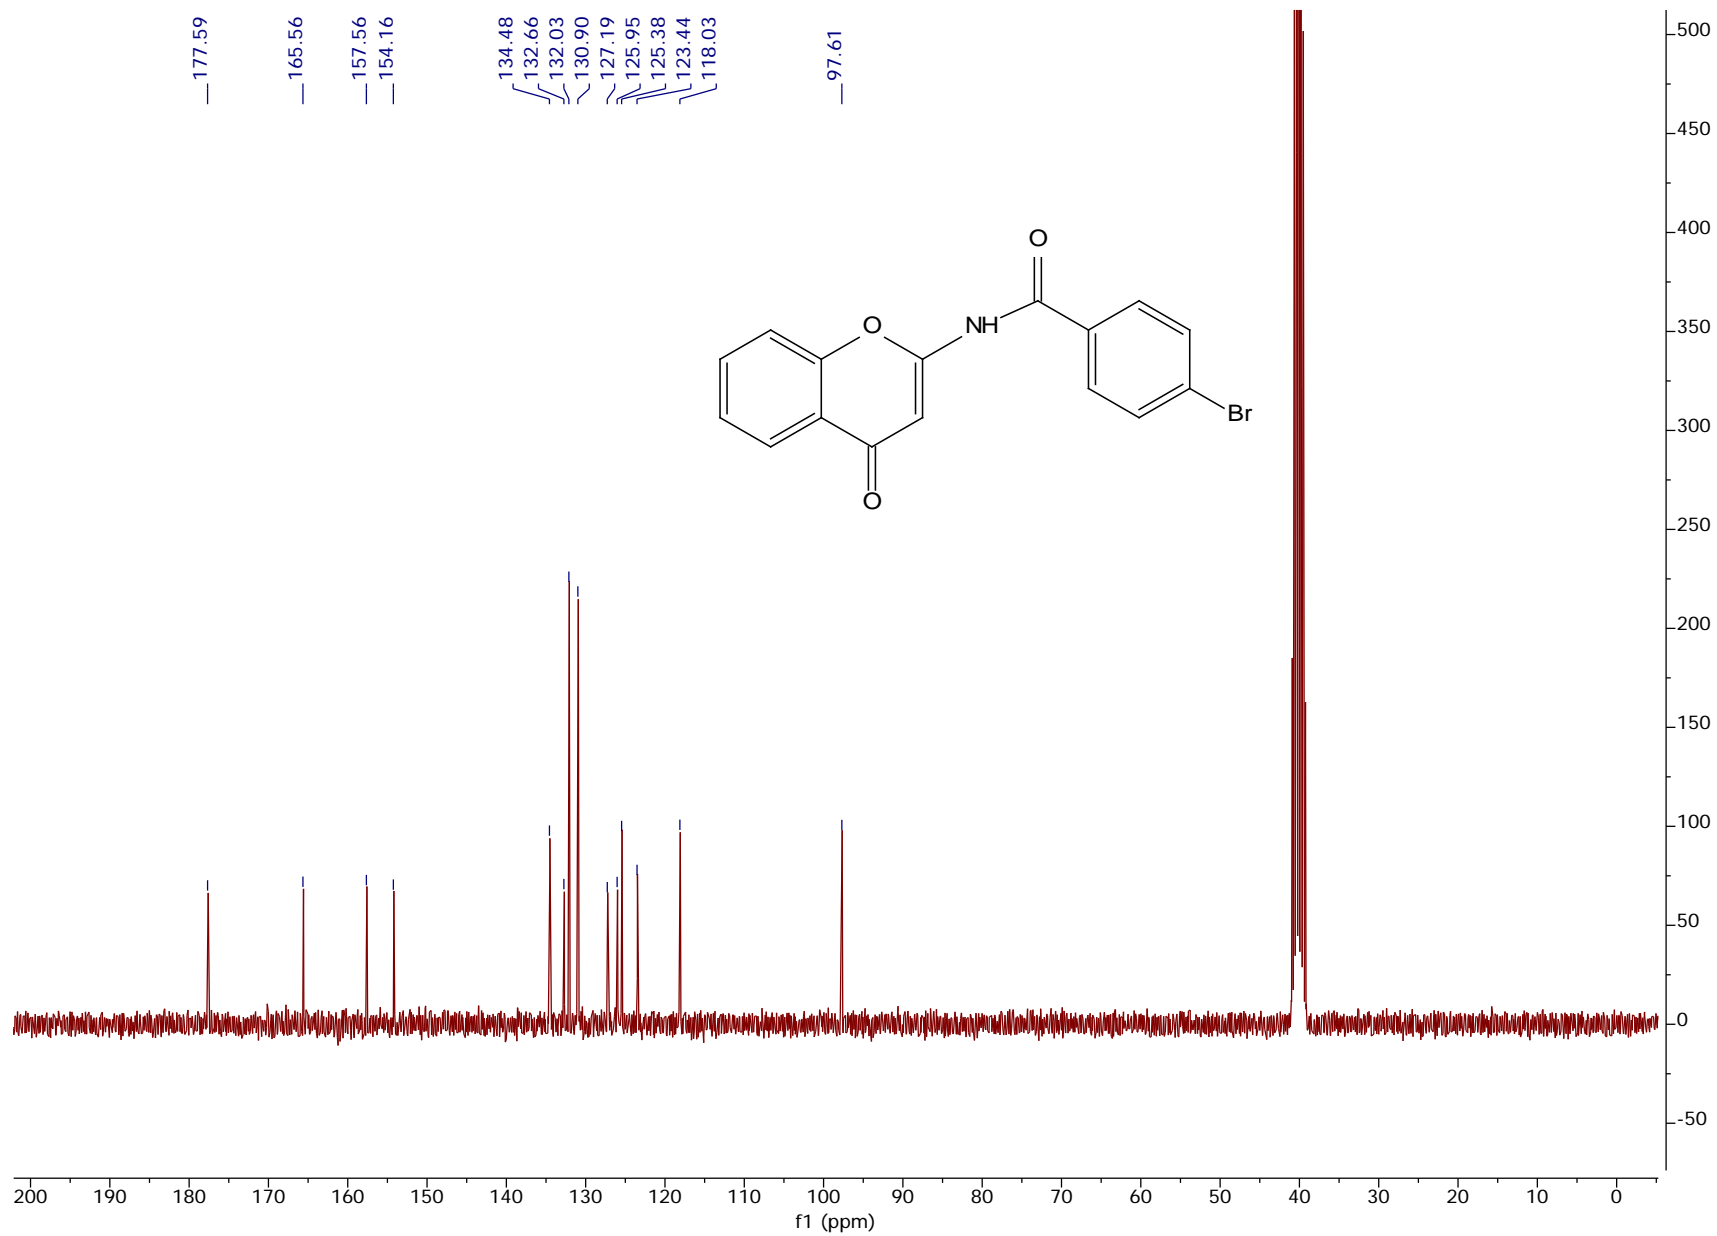

2-Fluoro-N-(4-oxo-4H-chromen-2-yl)benzamide (6h)

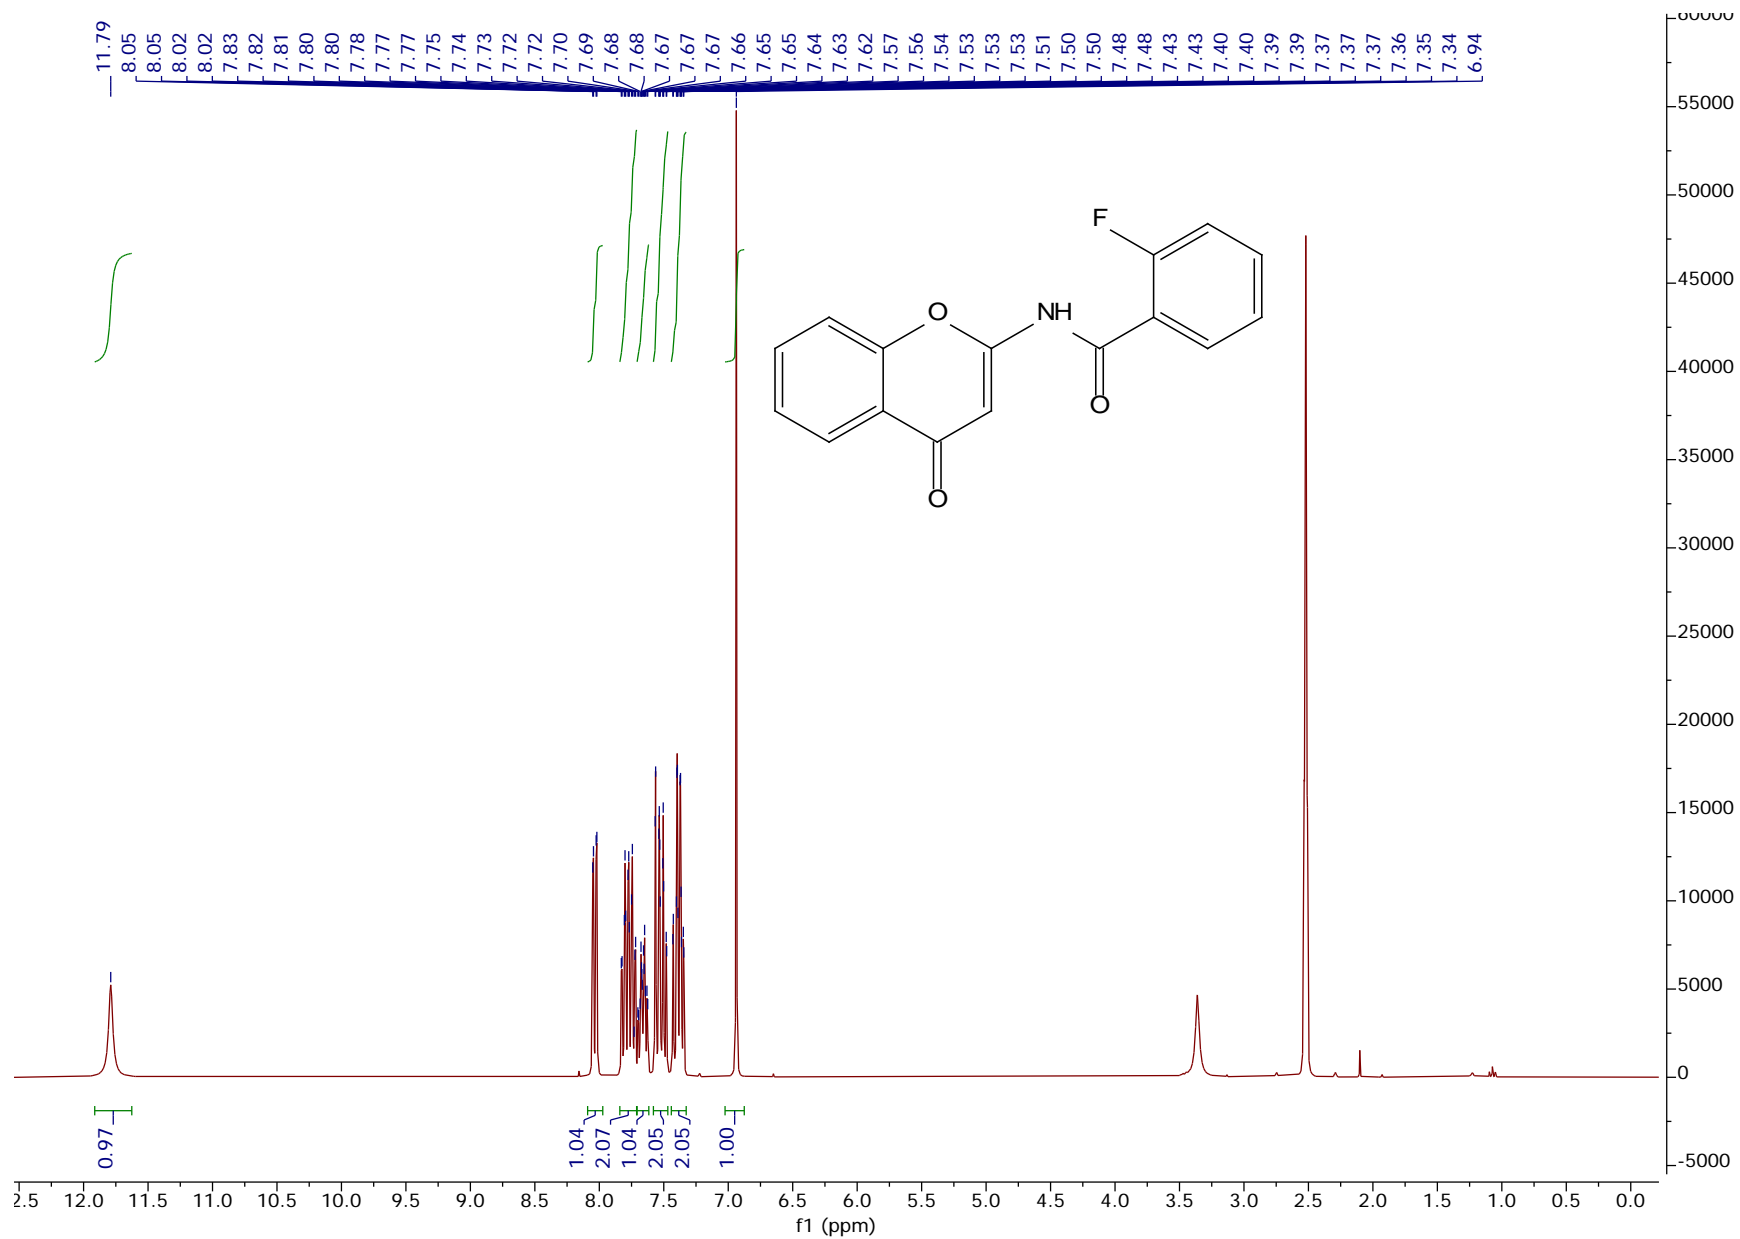

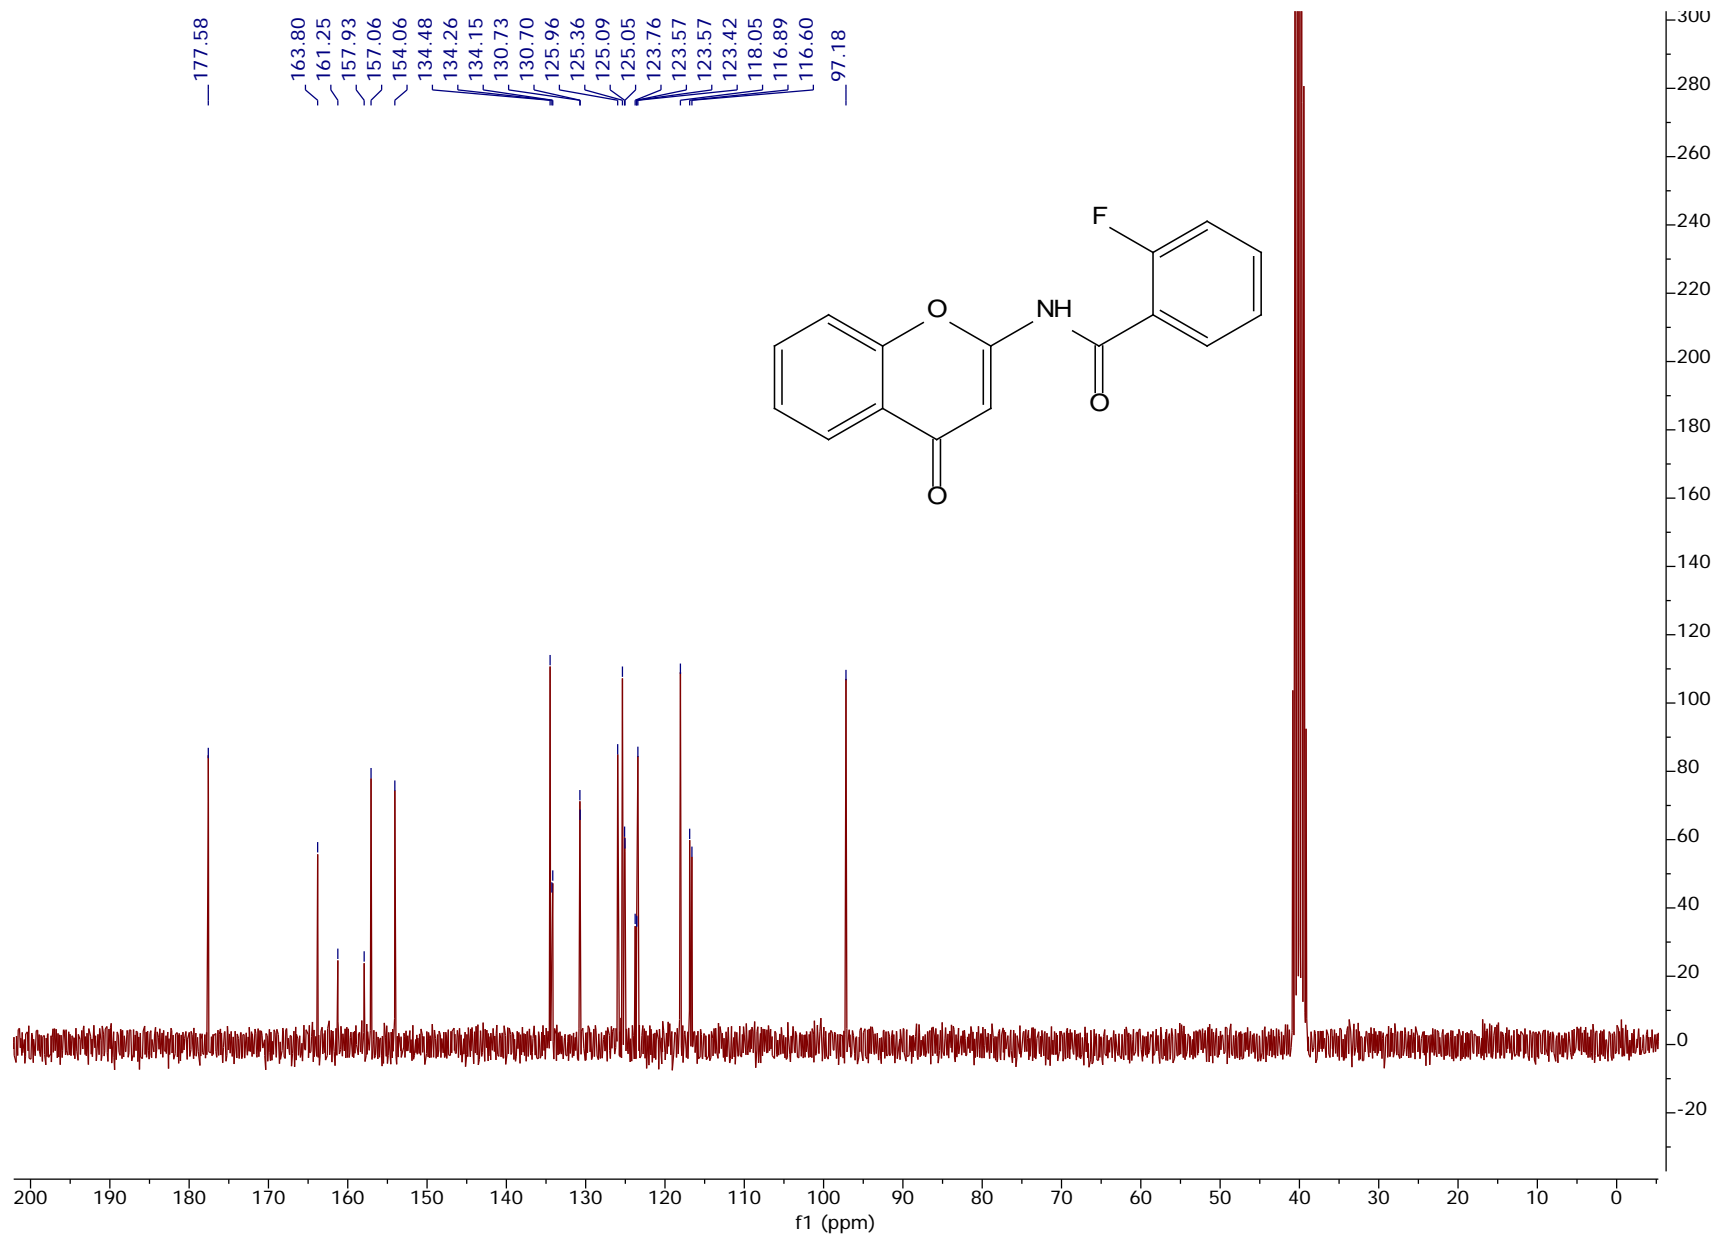

2-Chloro-*N*-(4-oxo-4*H*-chromen-2-yl)benzamide (6i)

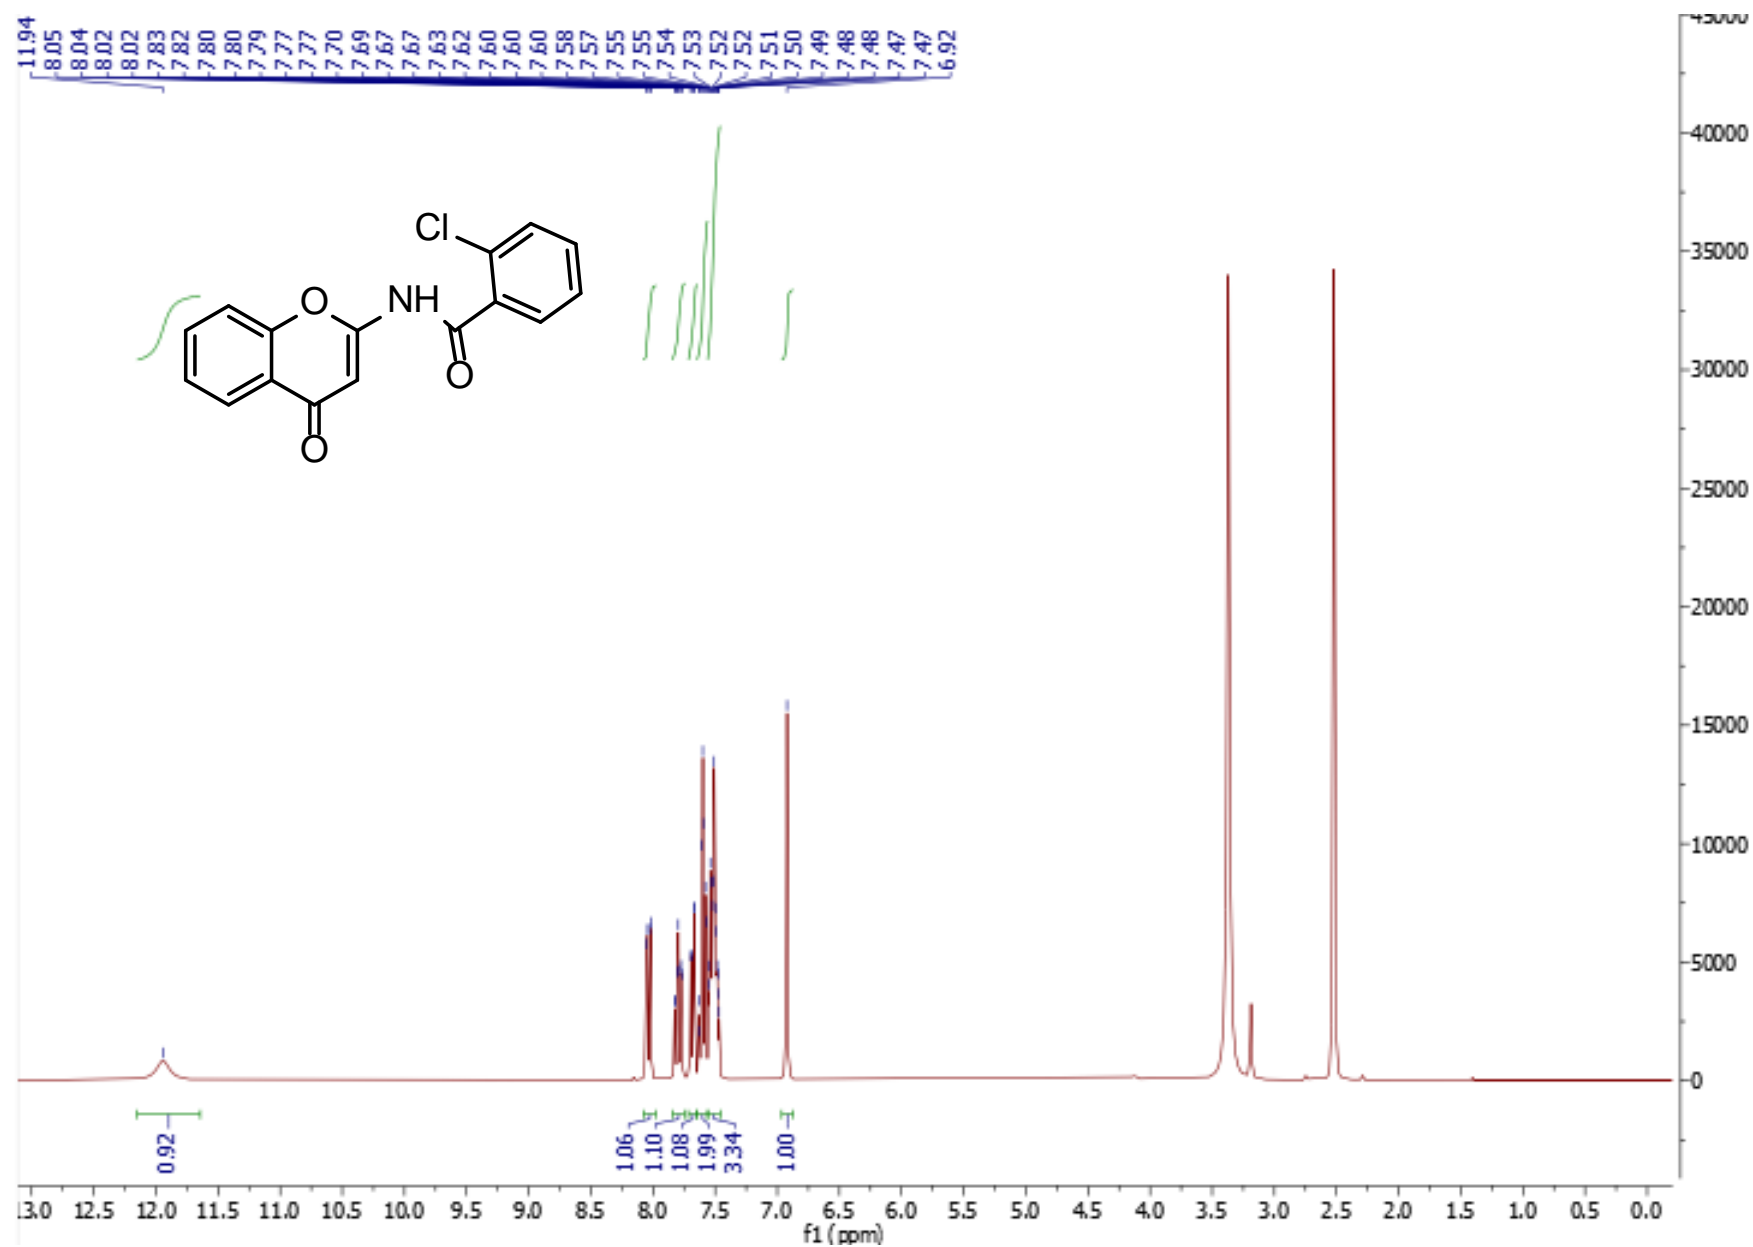

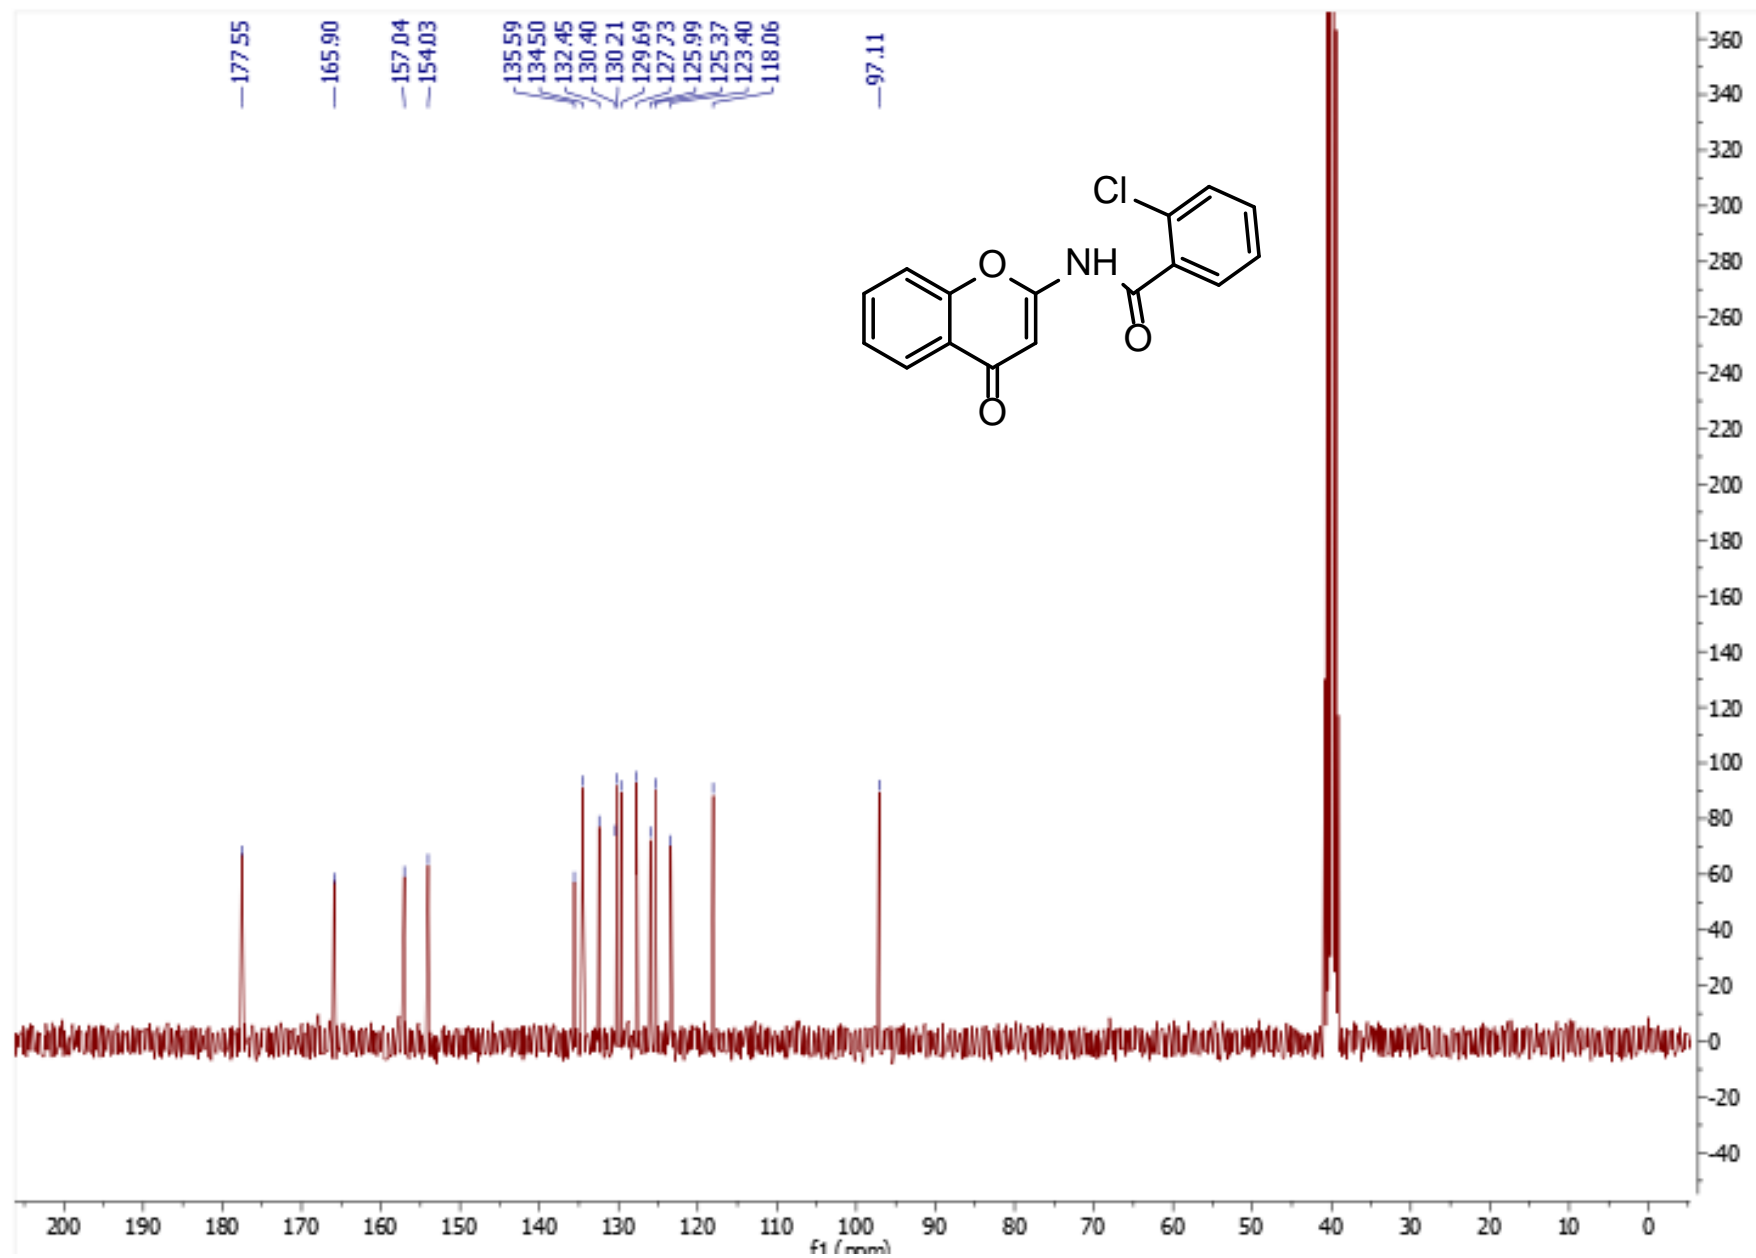



2-Bromo-N-(4-oxo-4H-chromen-2-yl)benzamide (6j)

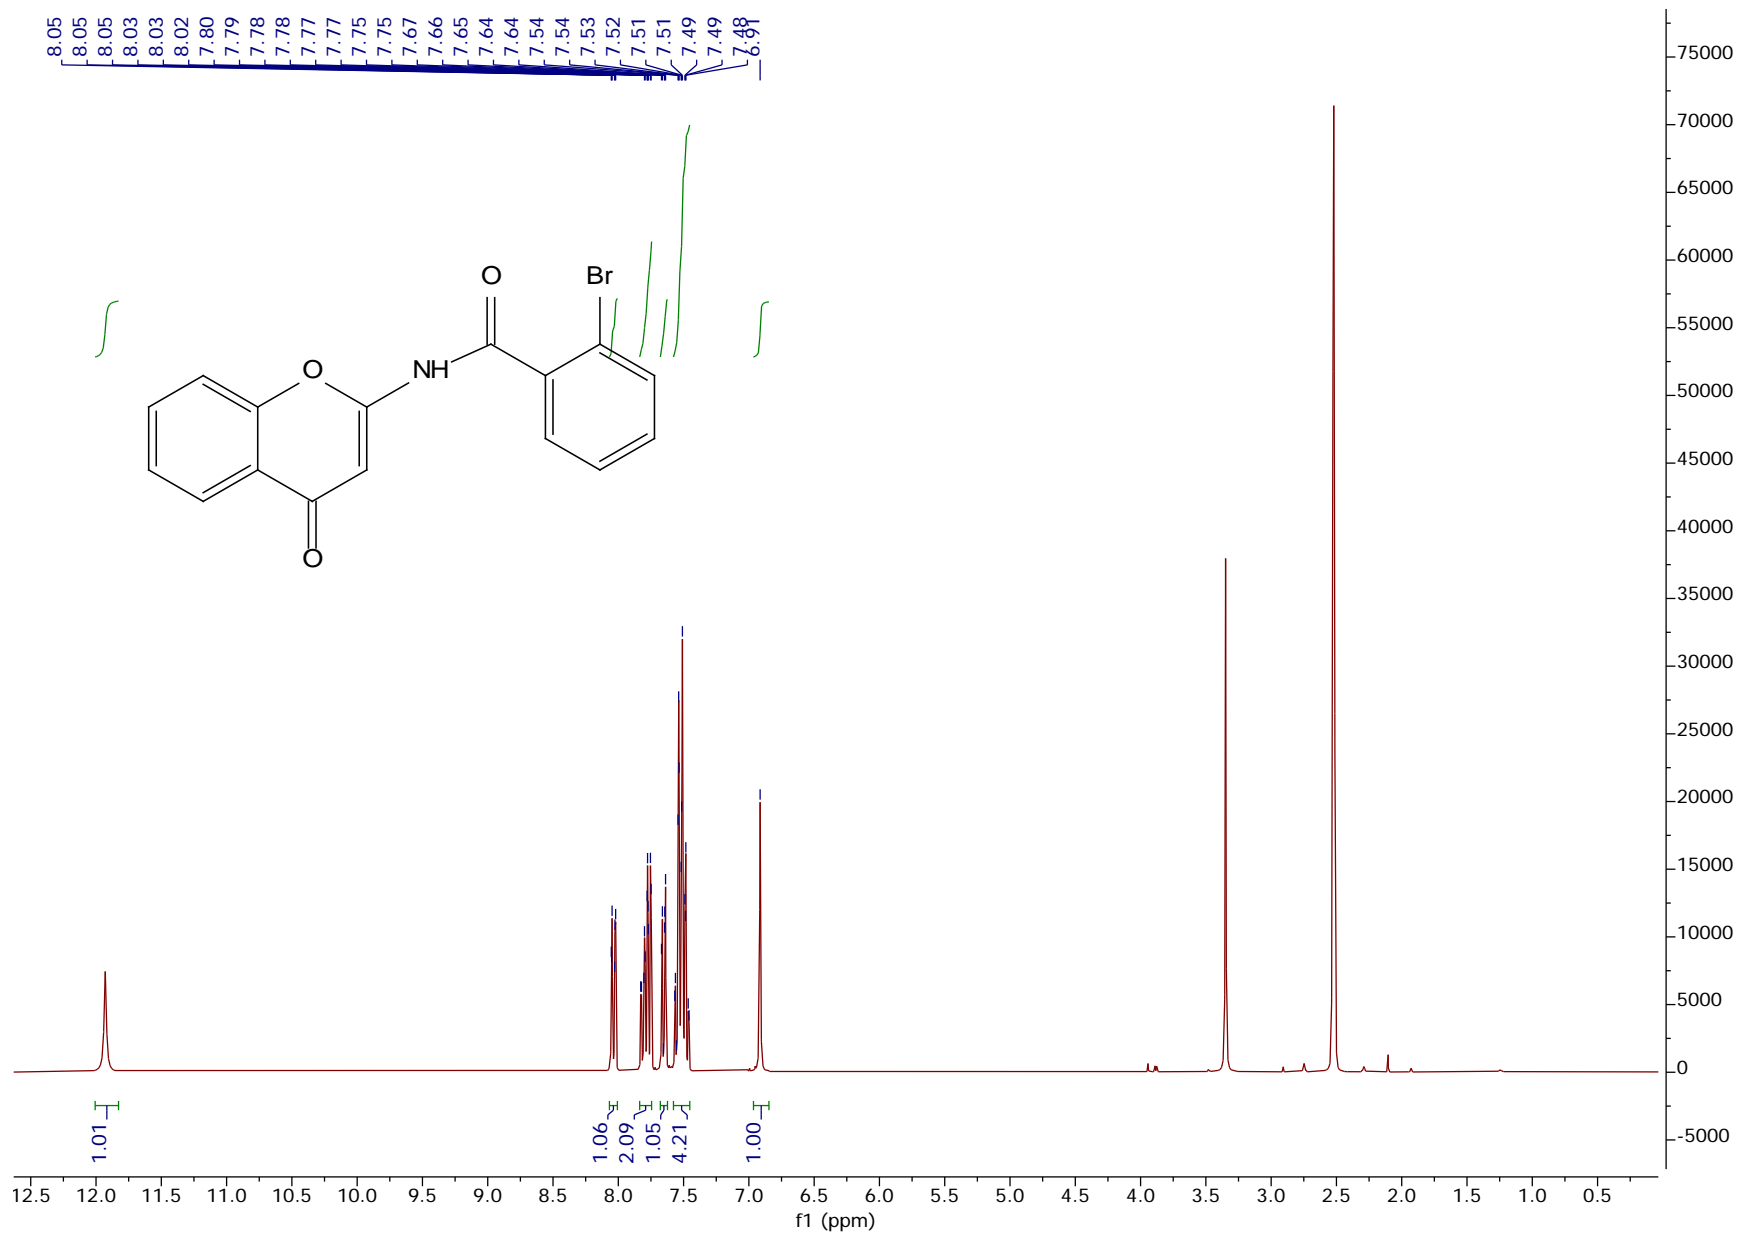

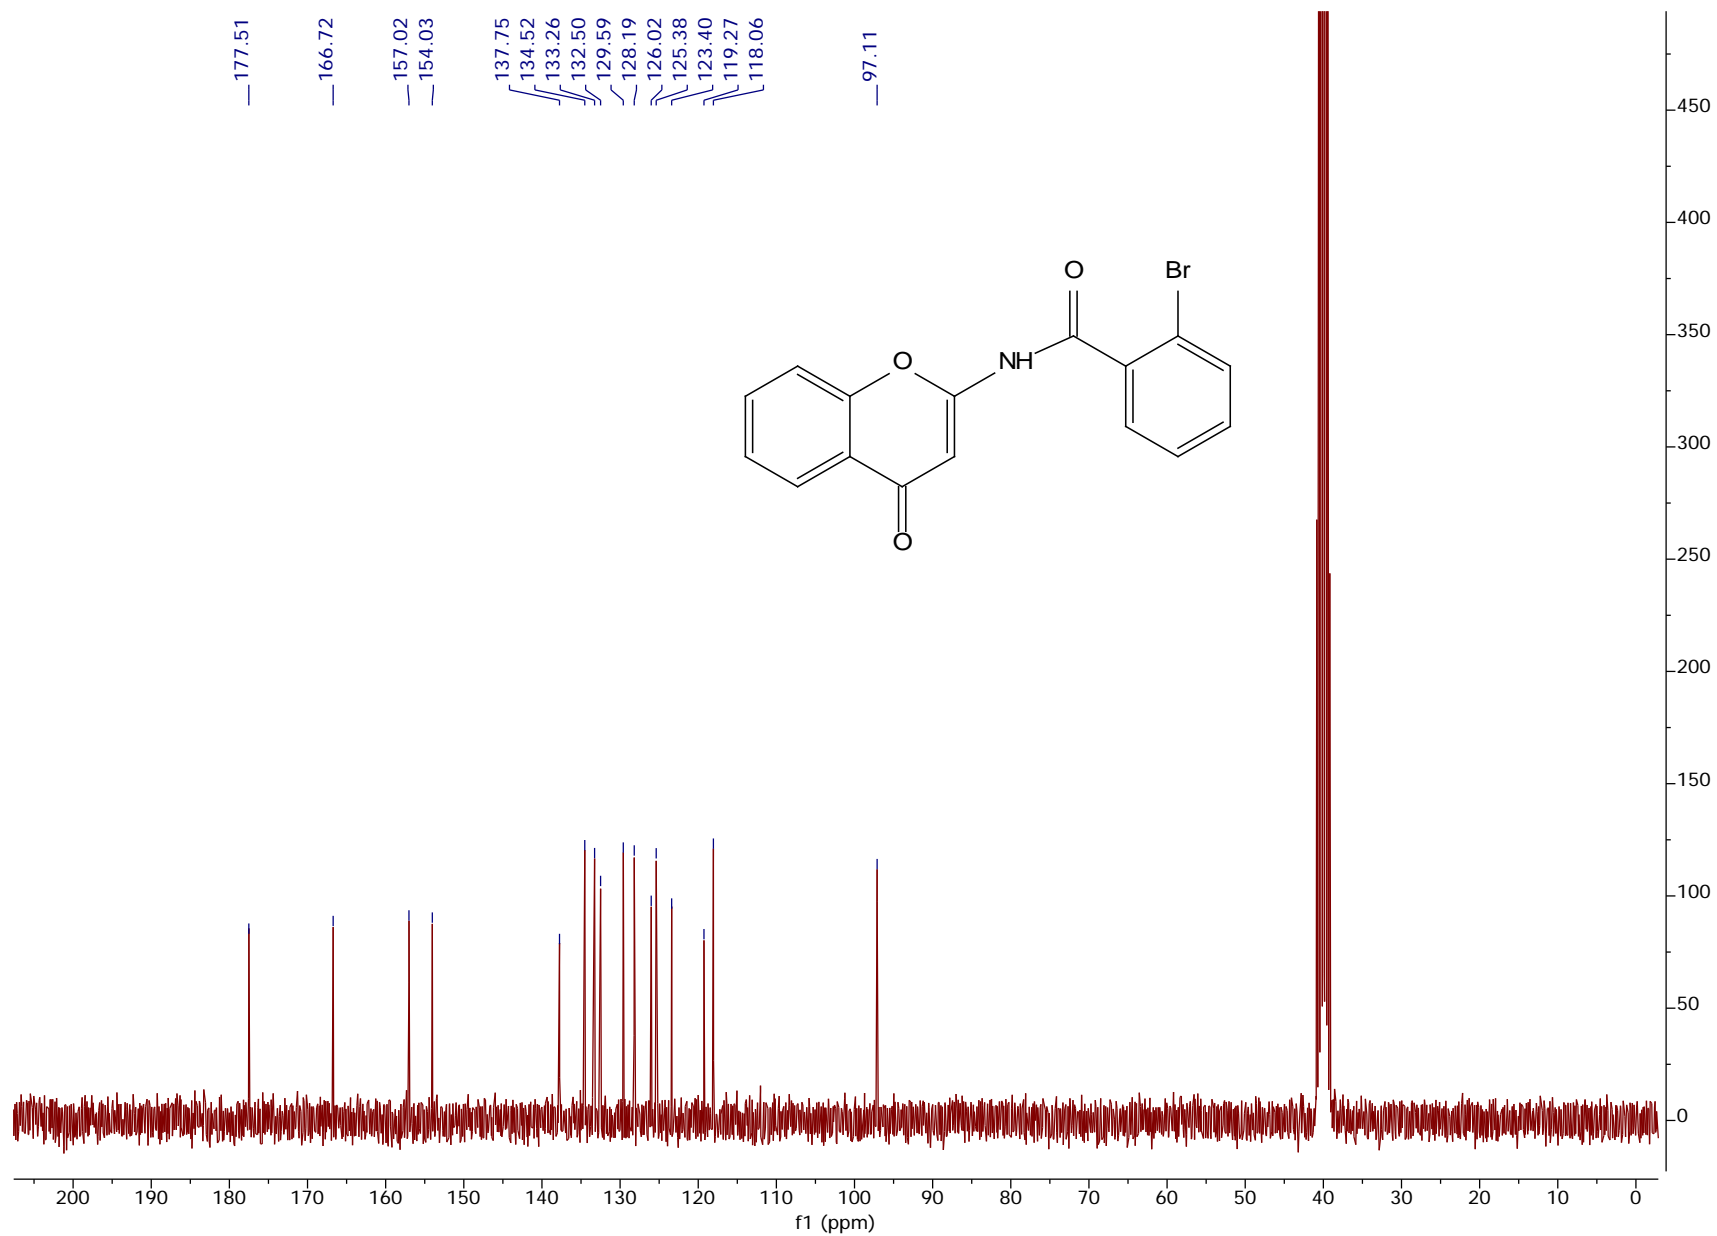

2-Chloro-4-fluoro-N-(4-oxo-4H-chromen-2-yl)benzamide (6k)

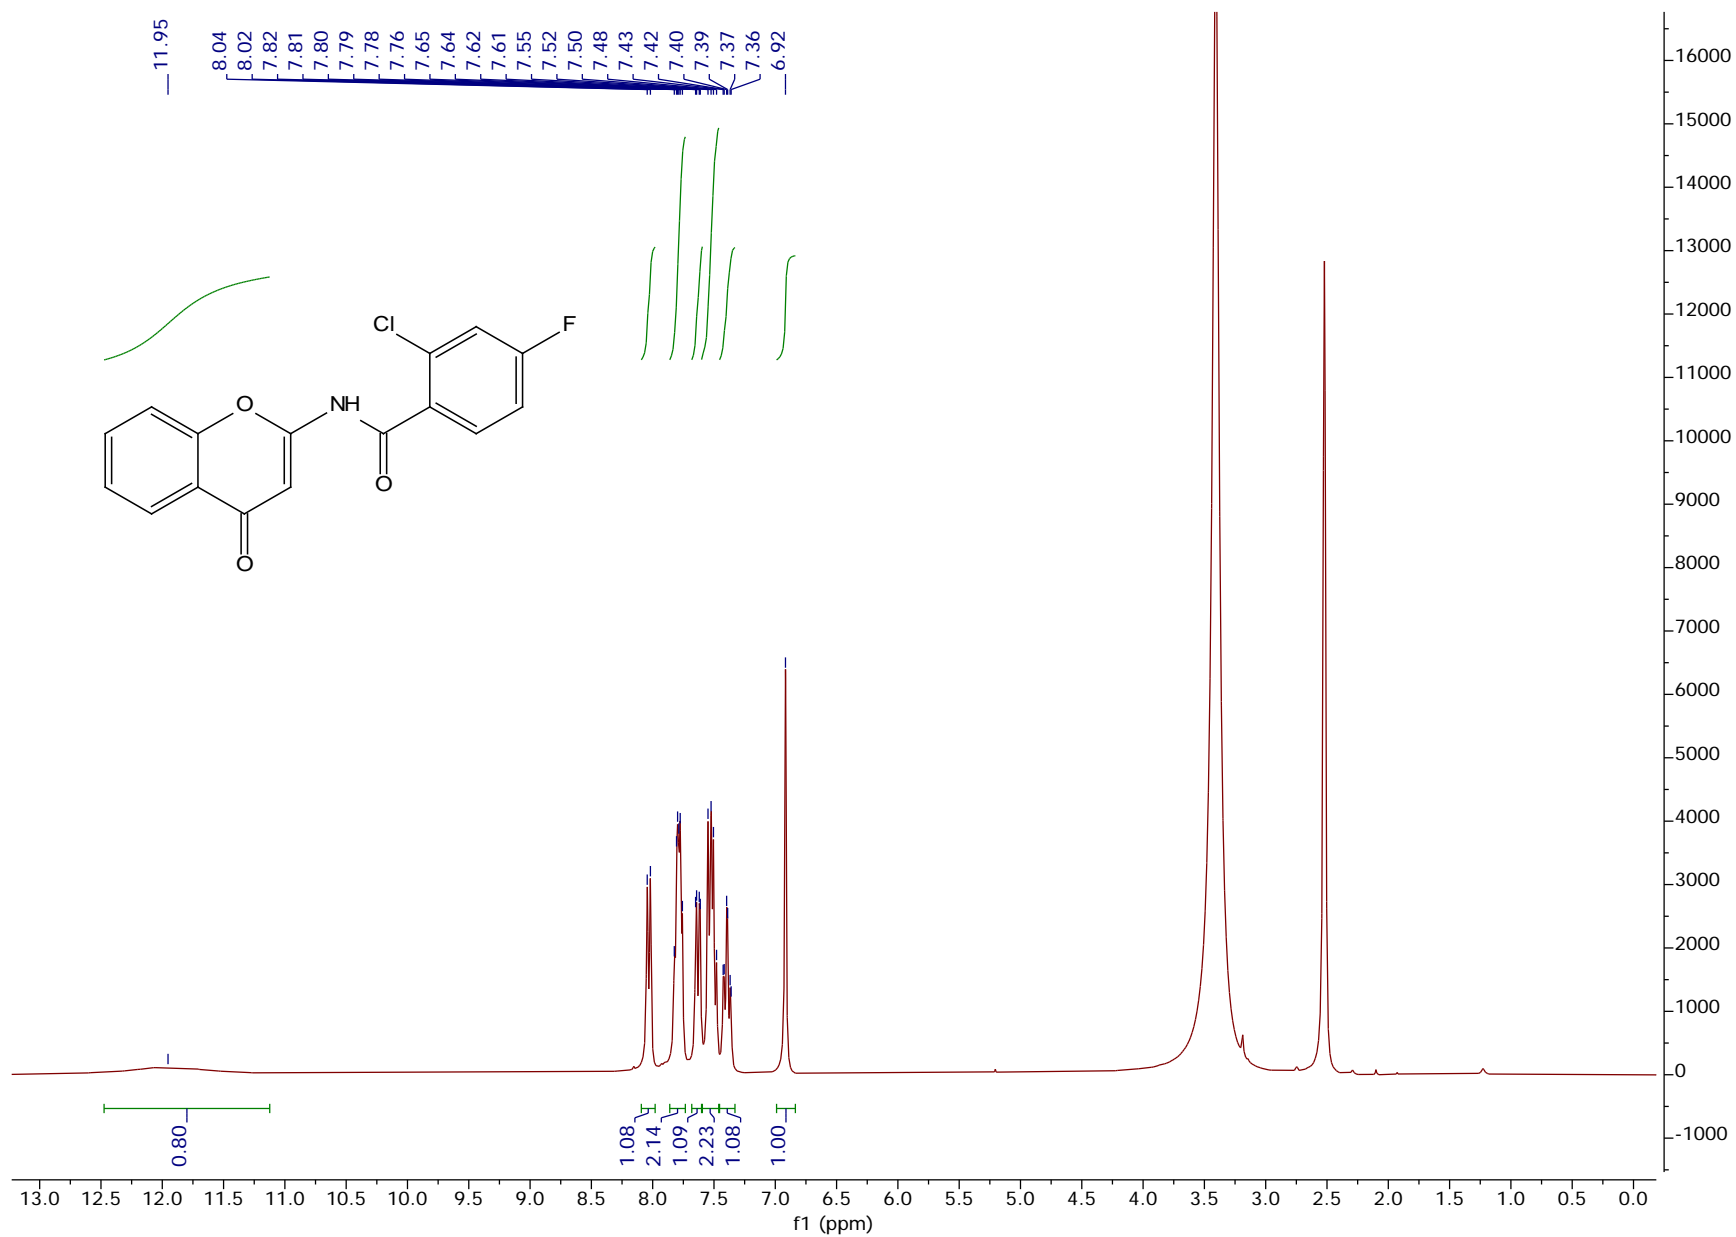

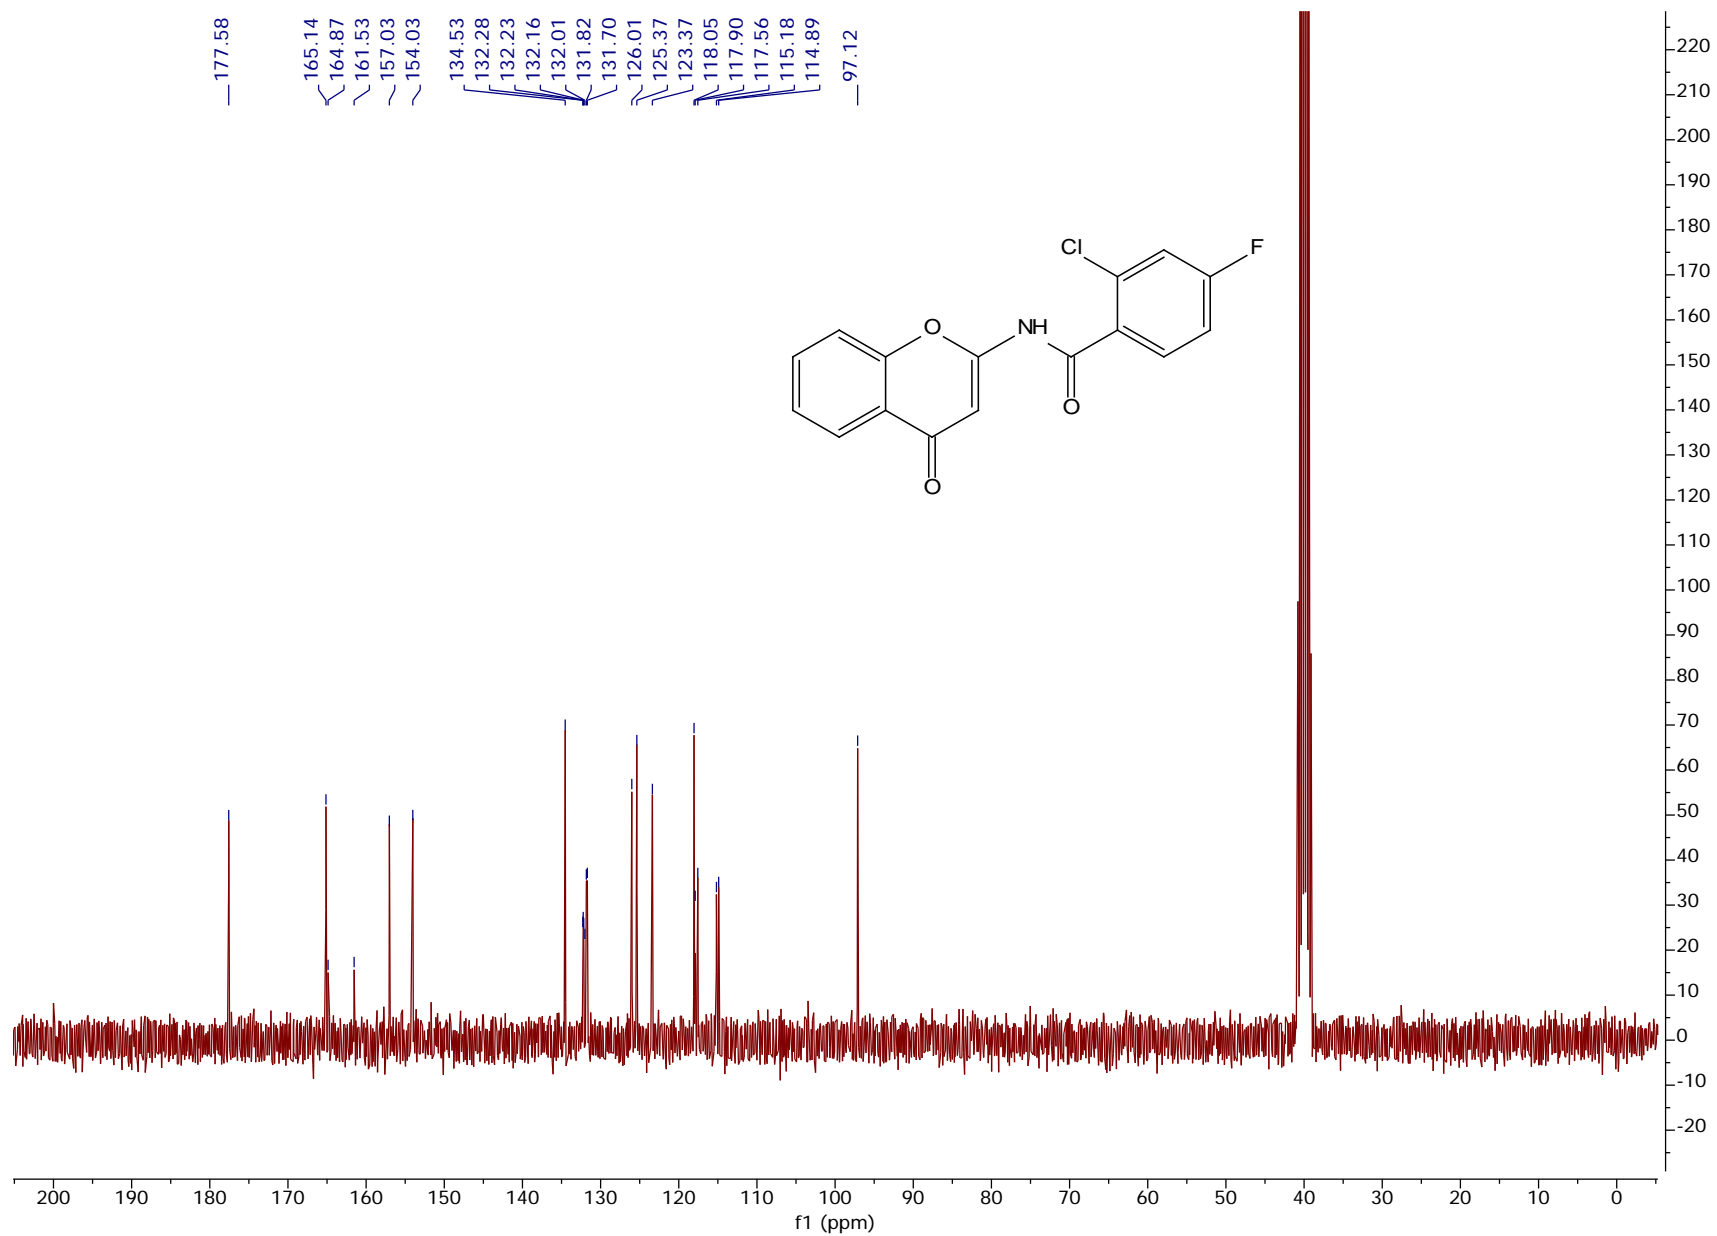

3-Chloro-4-fluoro-*N*-(4-oxo-4*H*-chromen-2-yl)benzamide (6l)

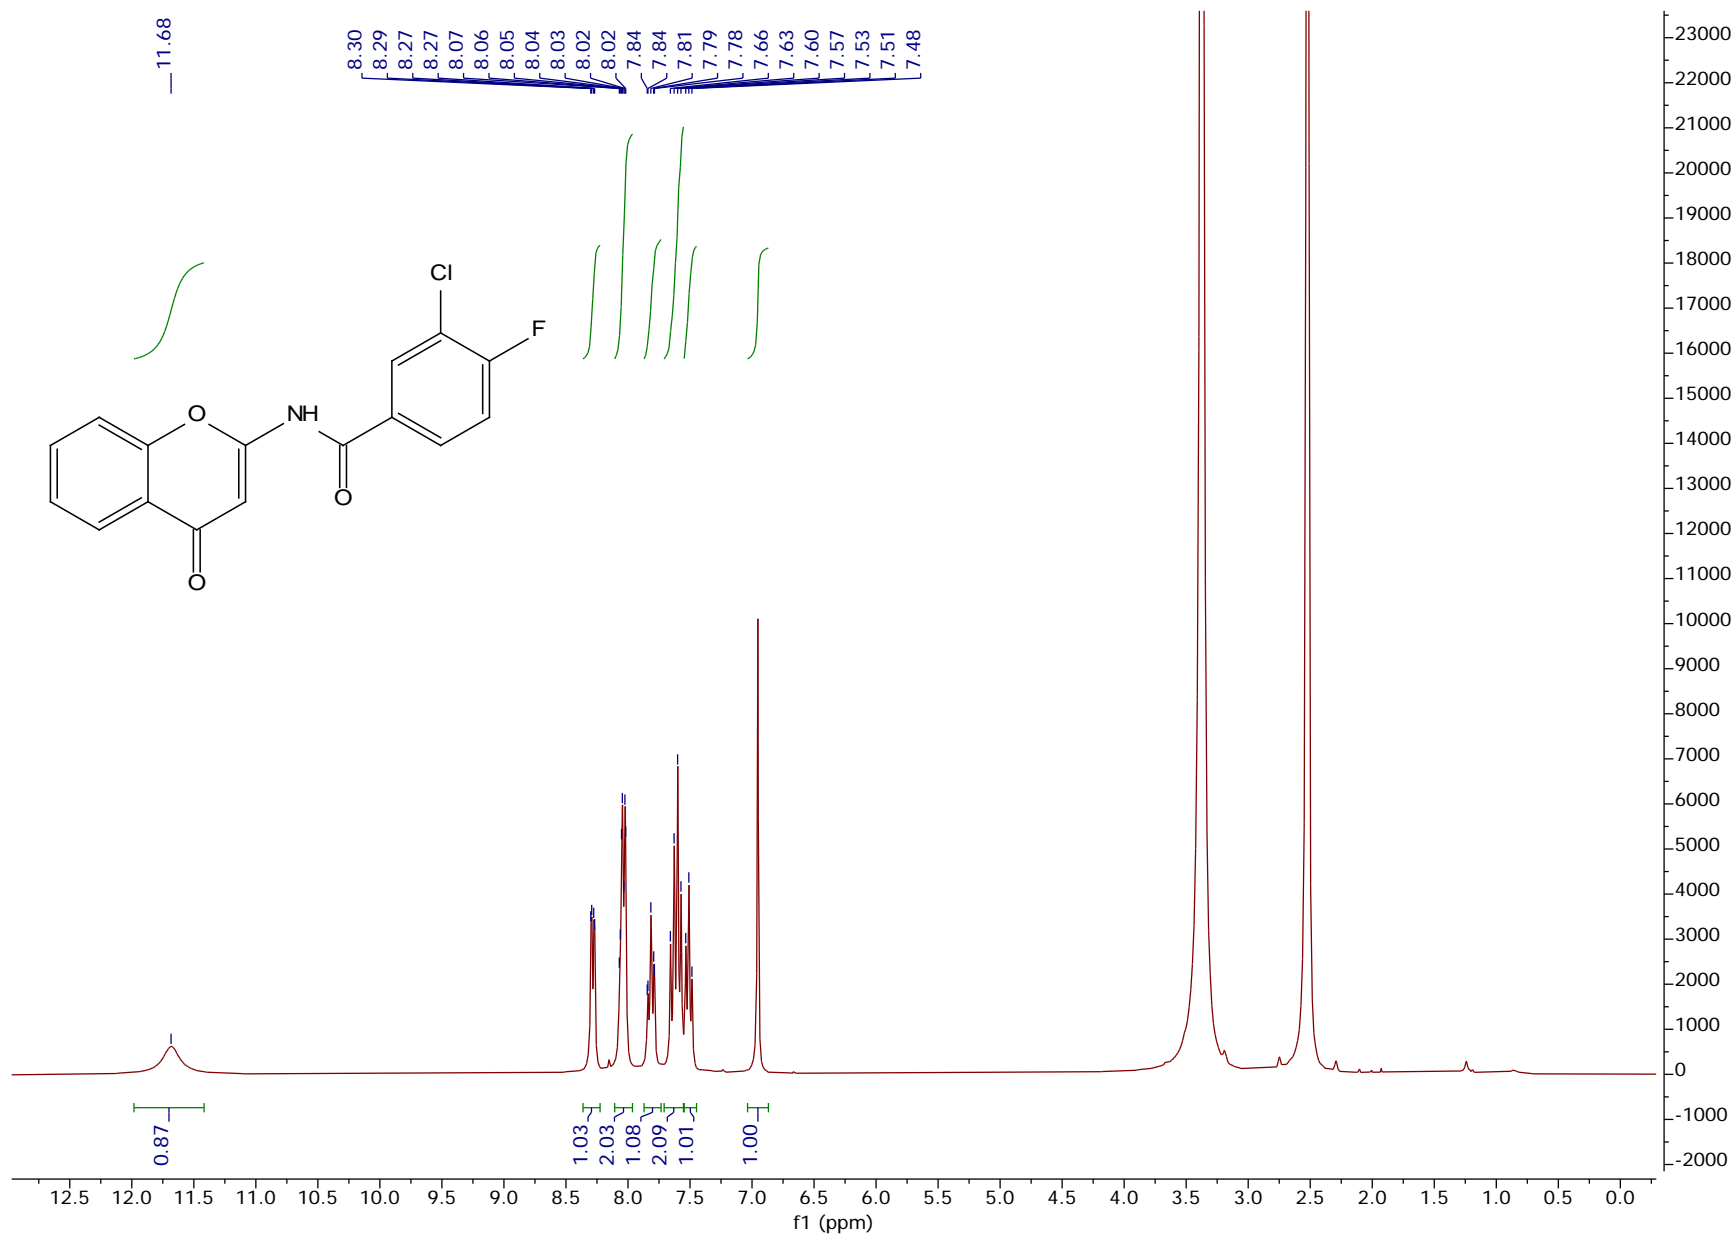

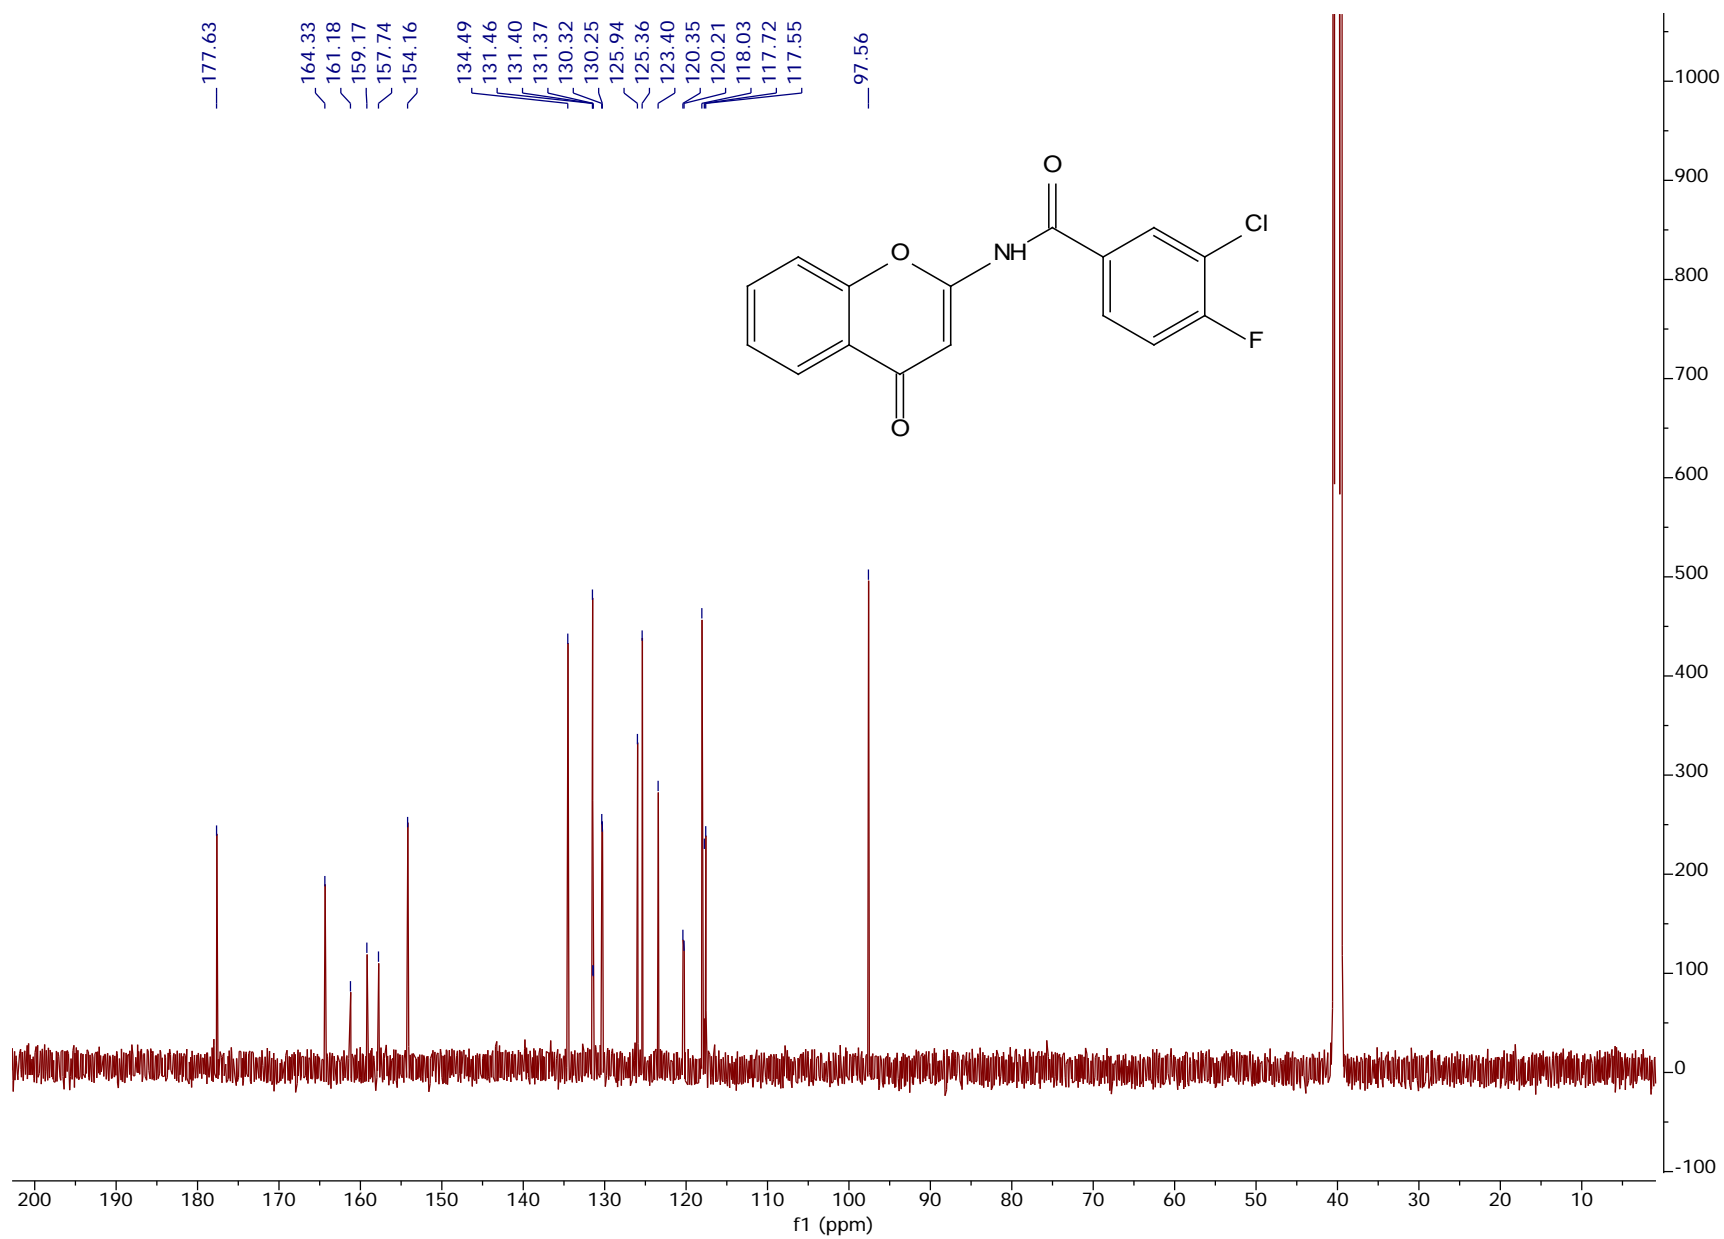

4-Nitro-*N*-(4-oxo-4*H*-chromen-2-yl)benzamide (6m)

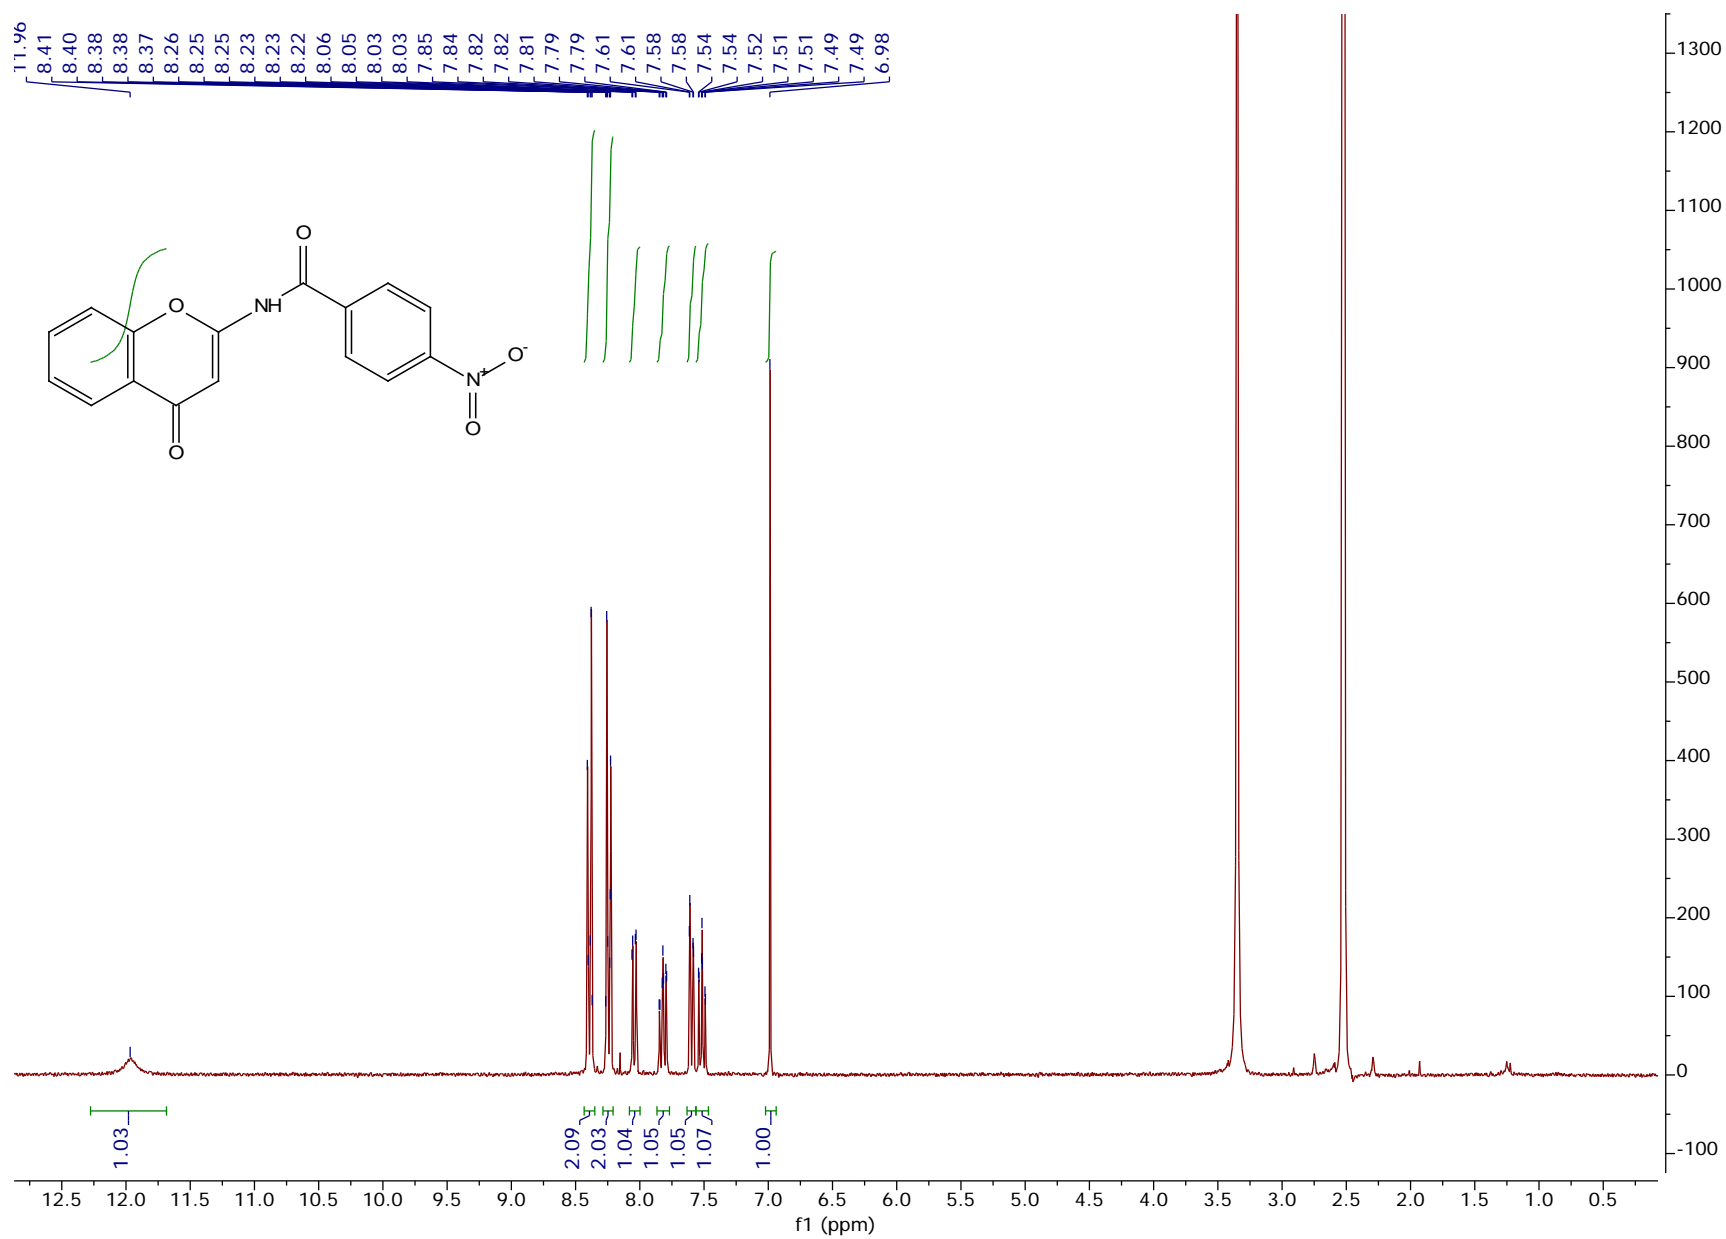

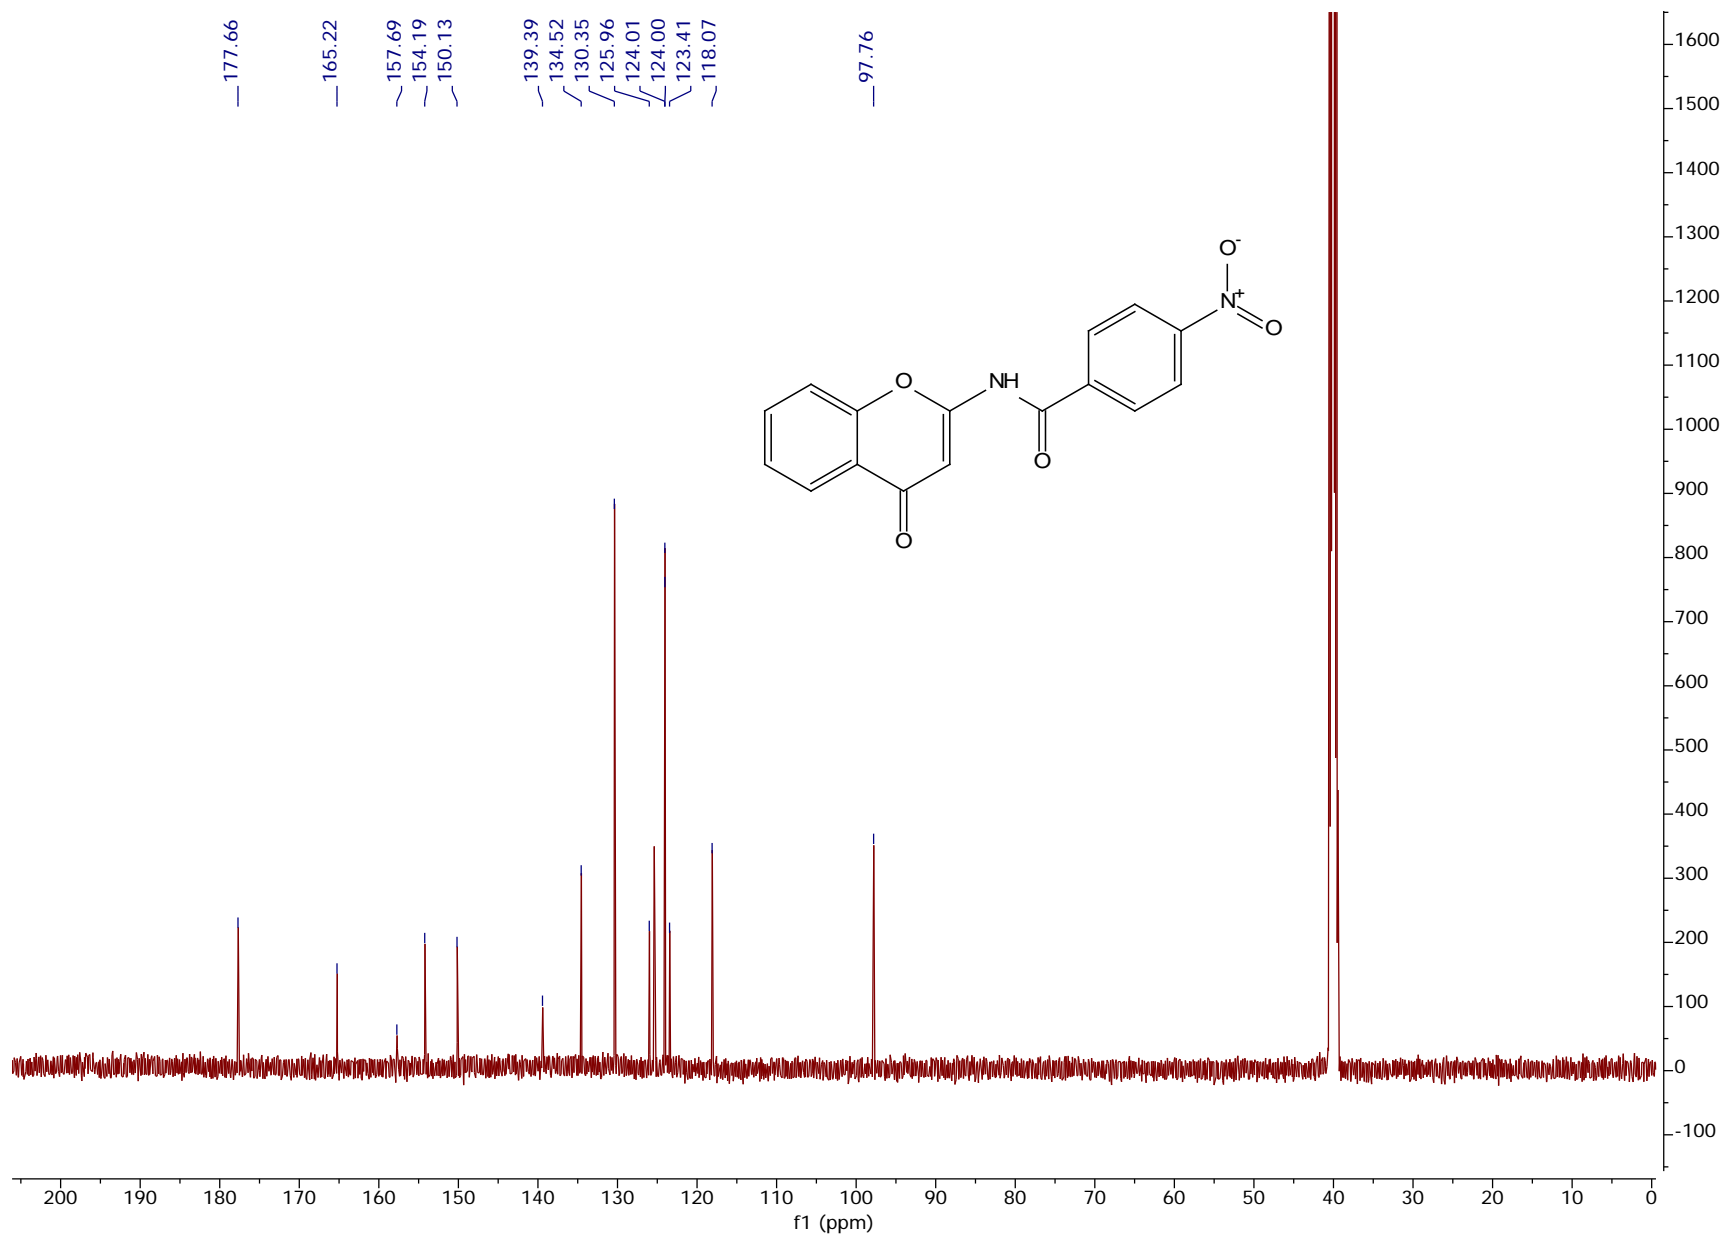



2,4-Dinitro-*N*-(4-oxo-4*H*-chromen-2-yl)benzamide (6n)

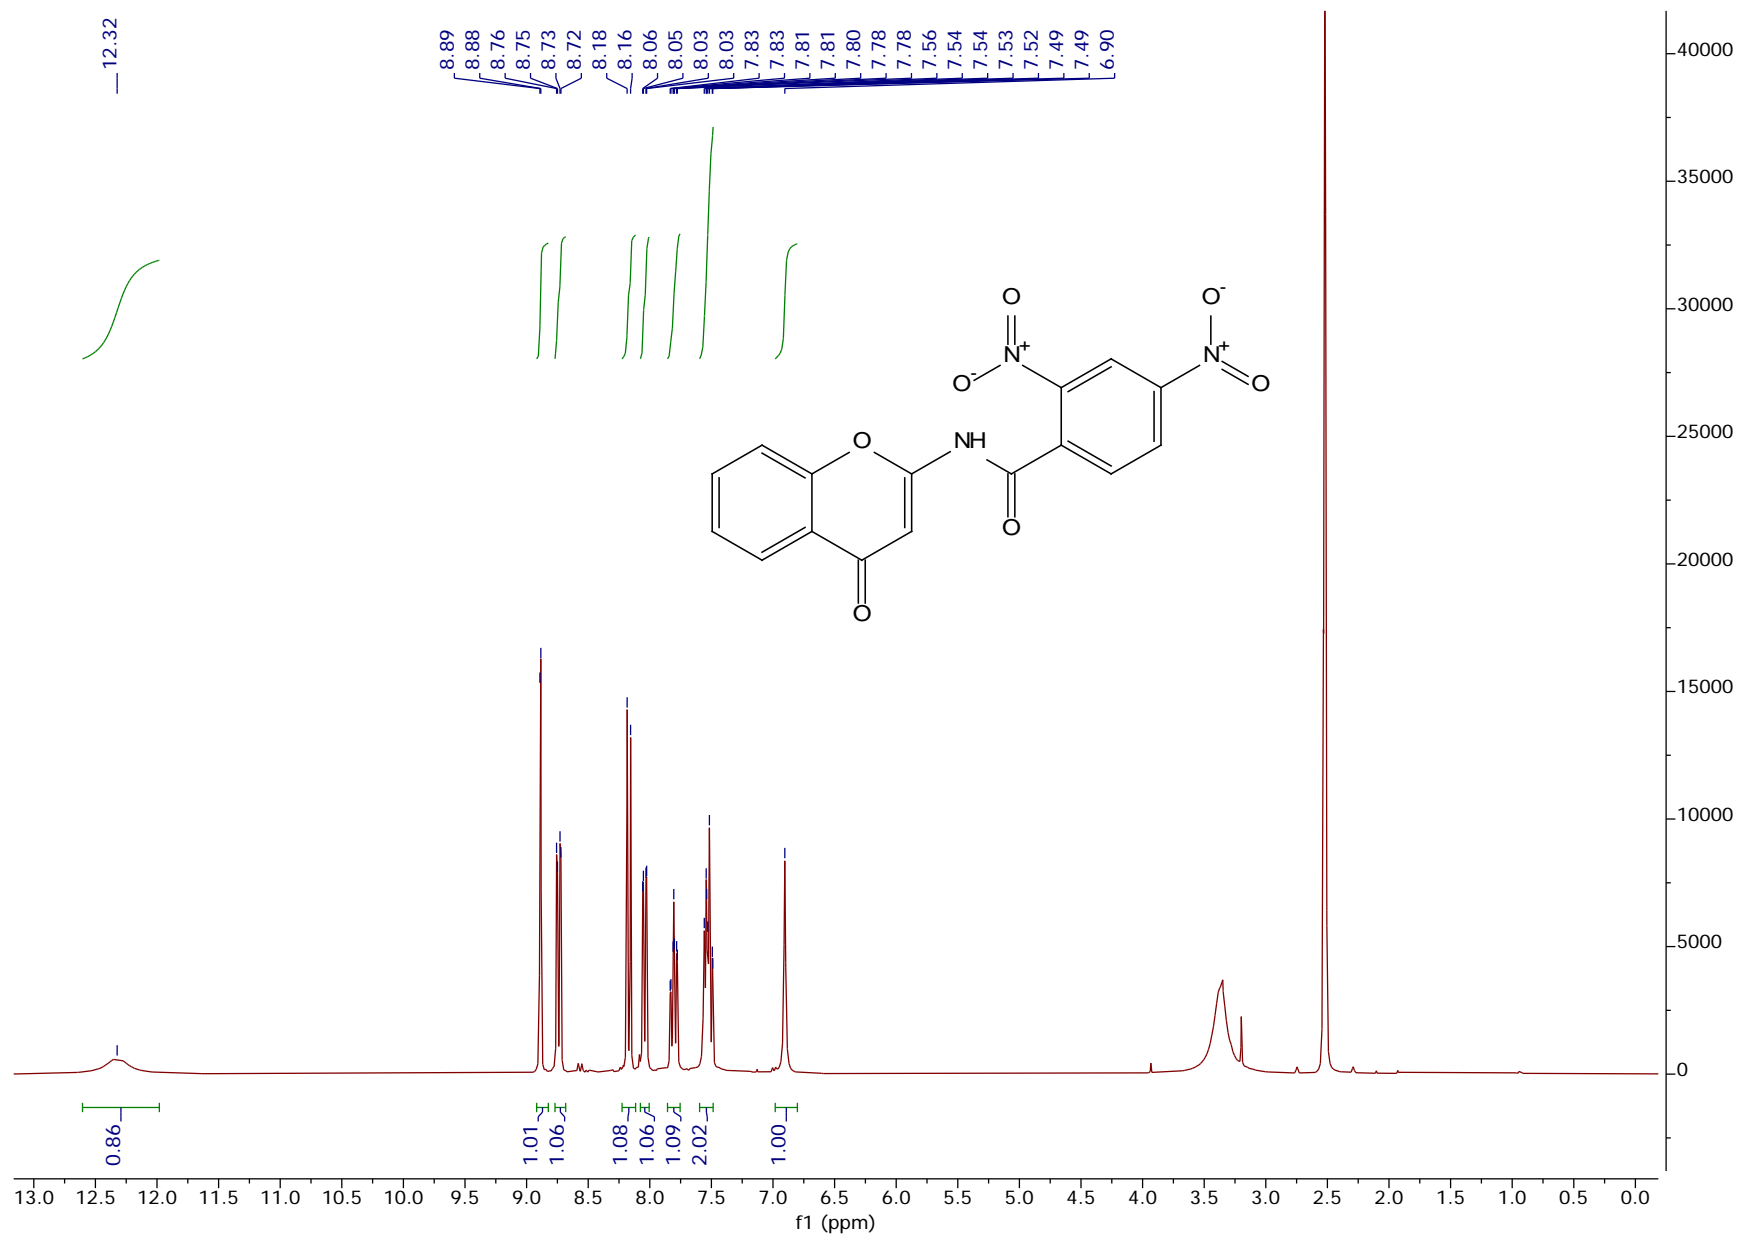

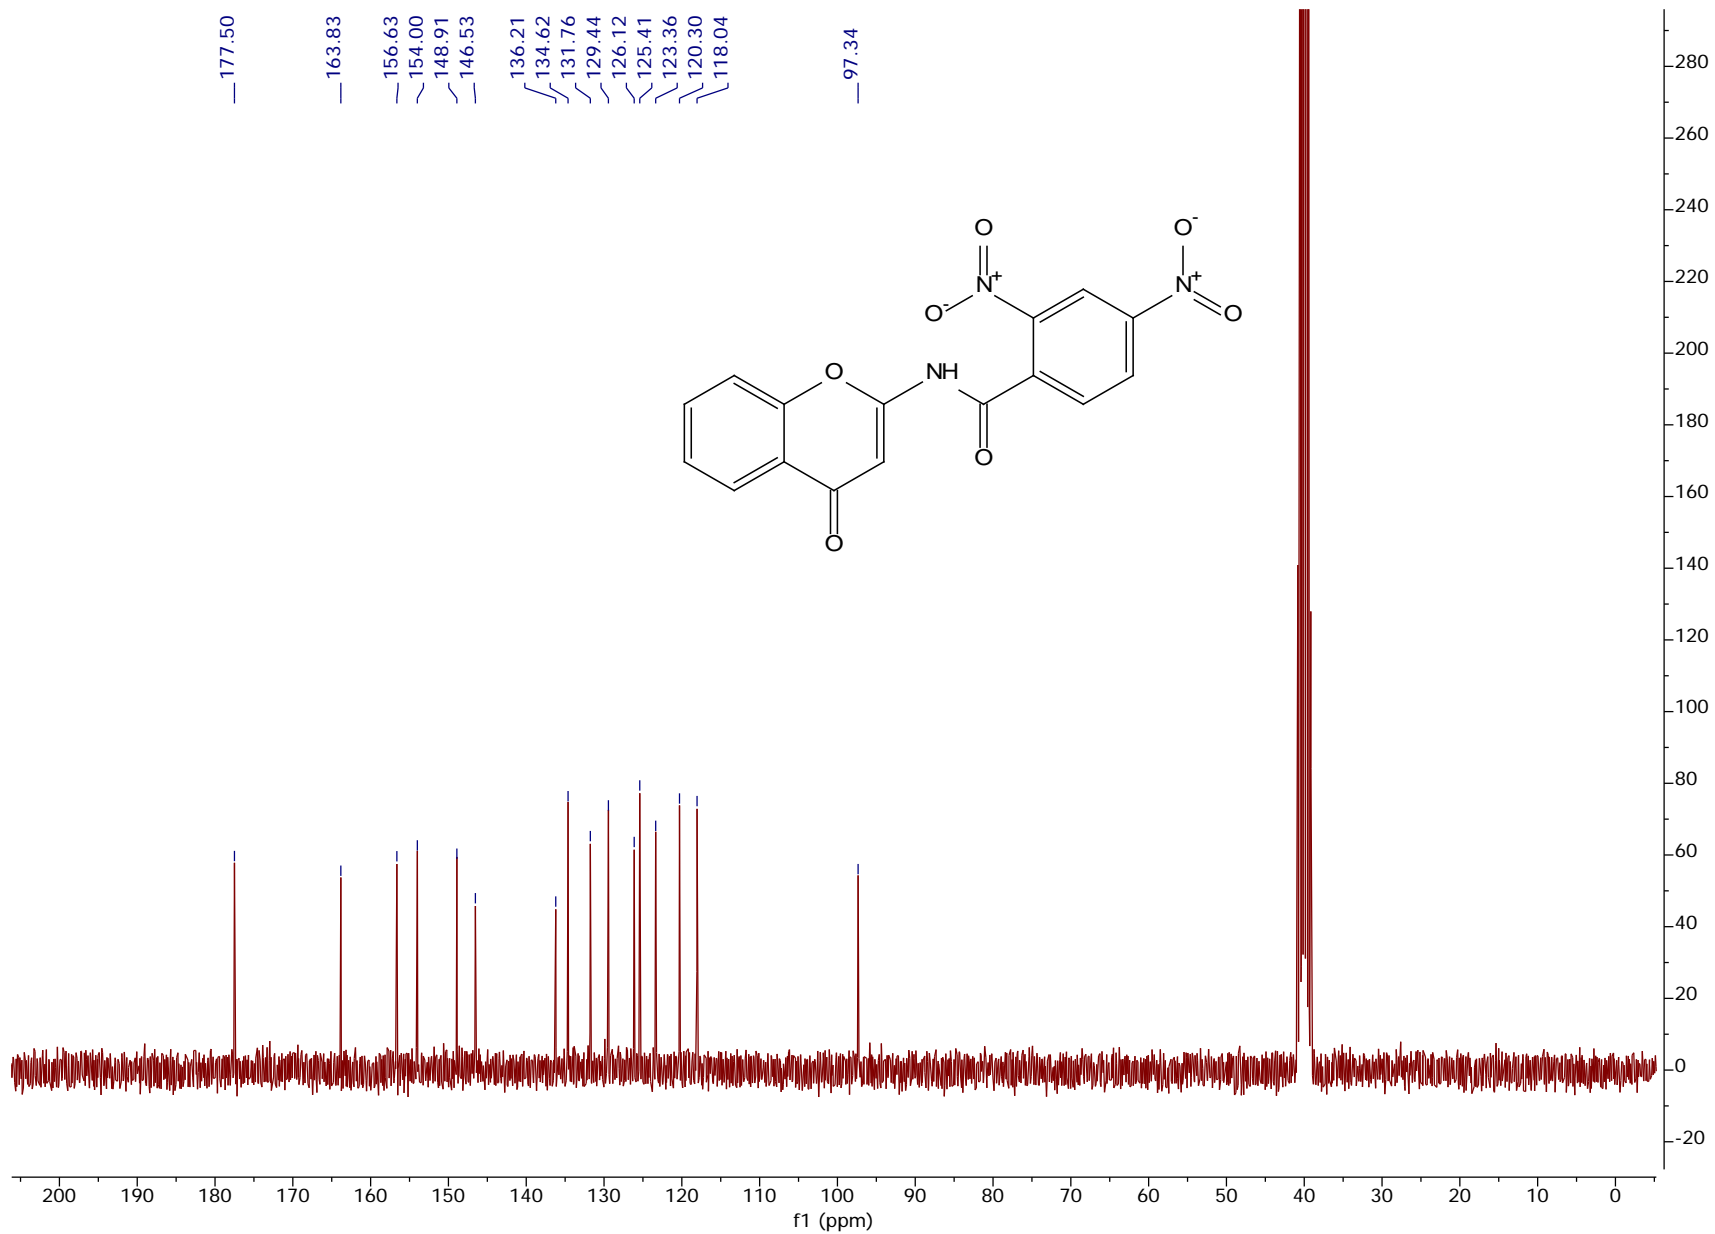

2,4-Dinitro-N-(4-oxo-4H-chromen-2-yl)benzamide (6n)

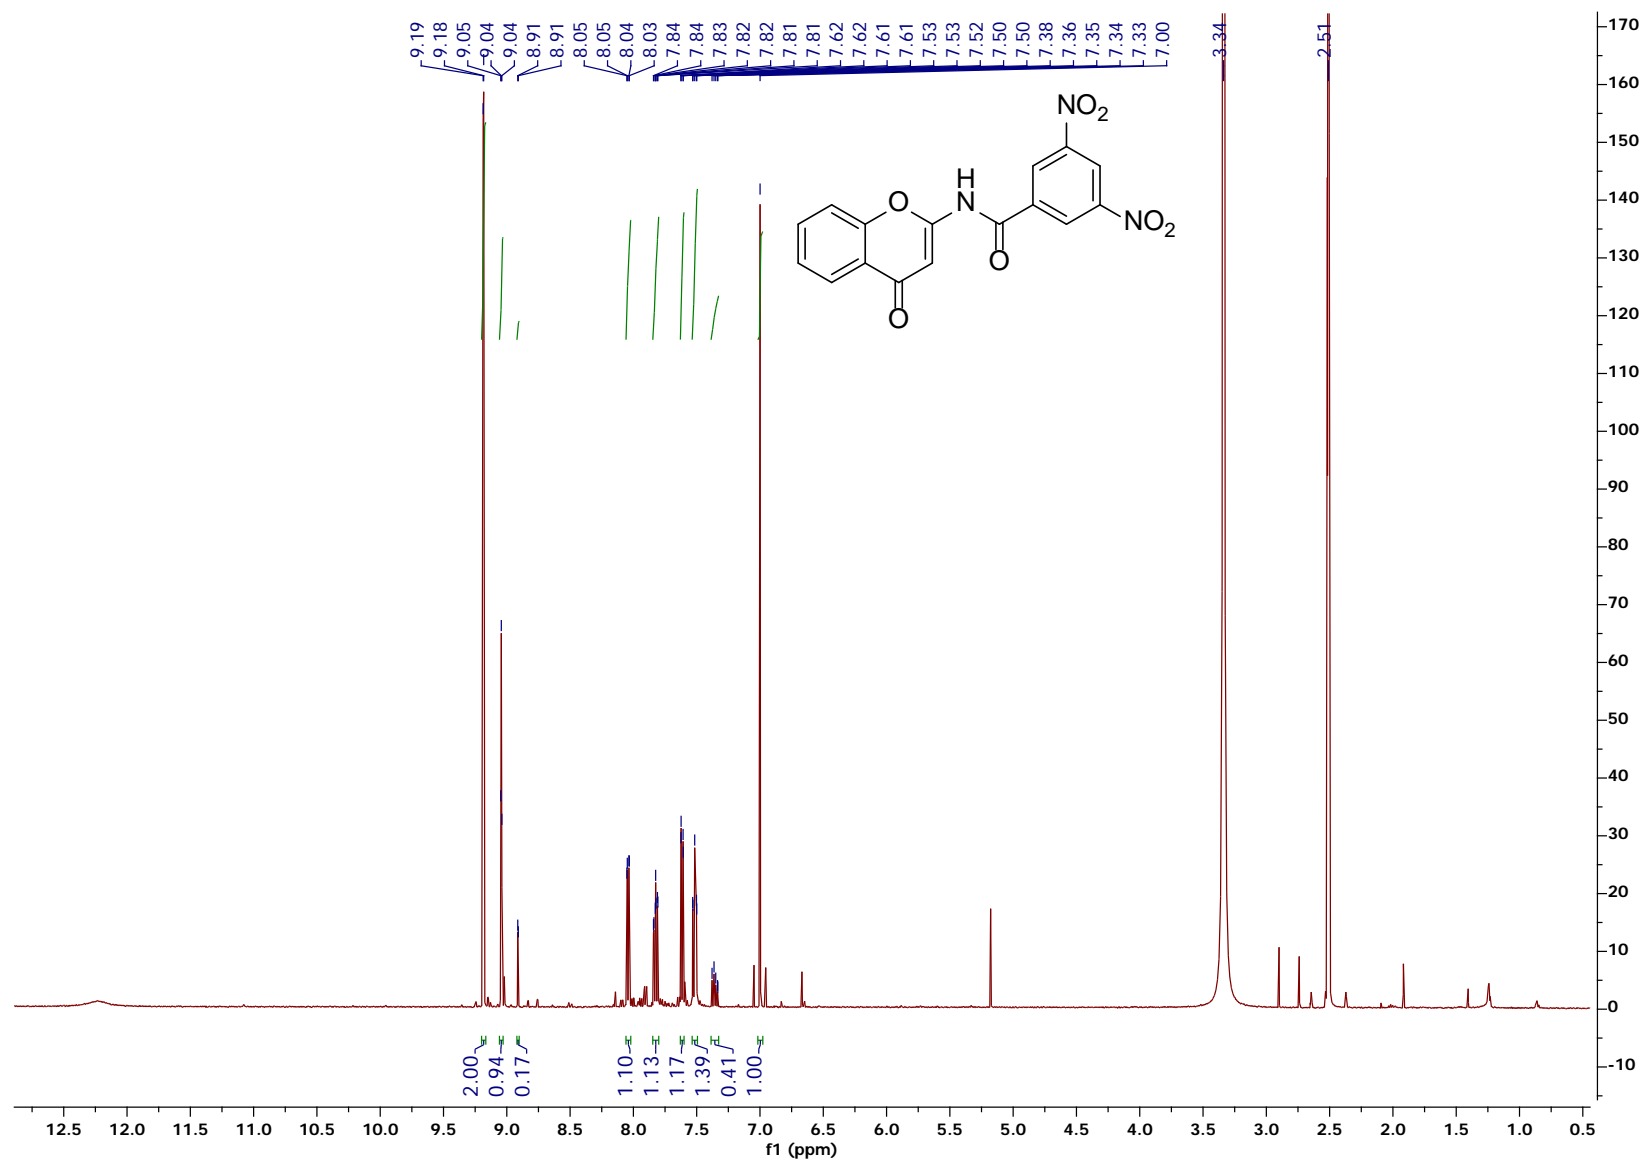

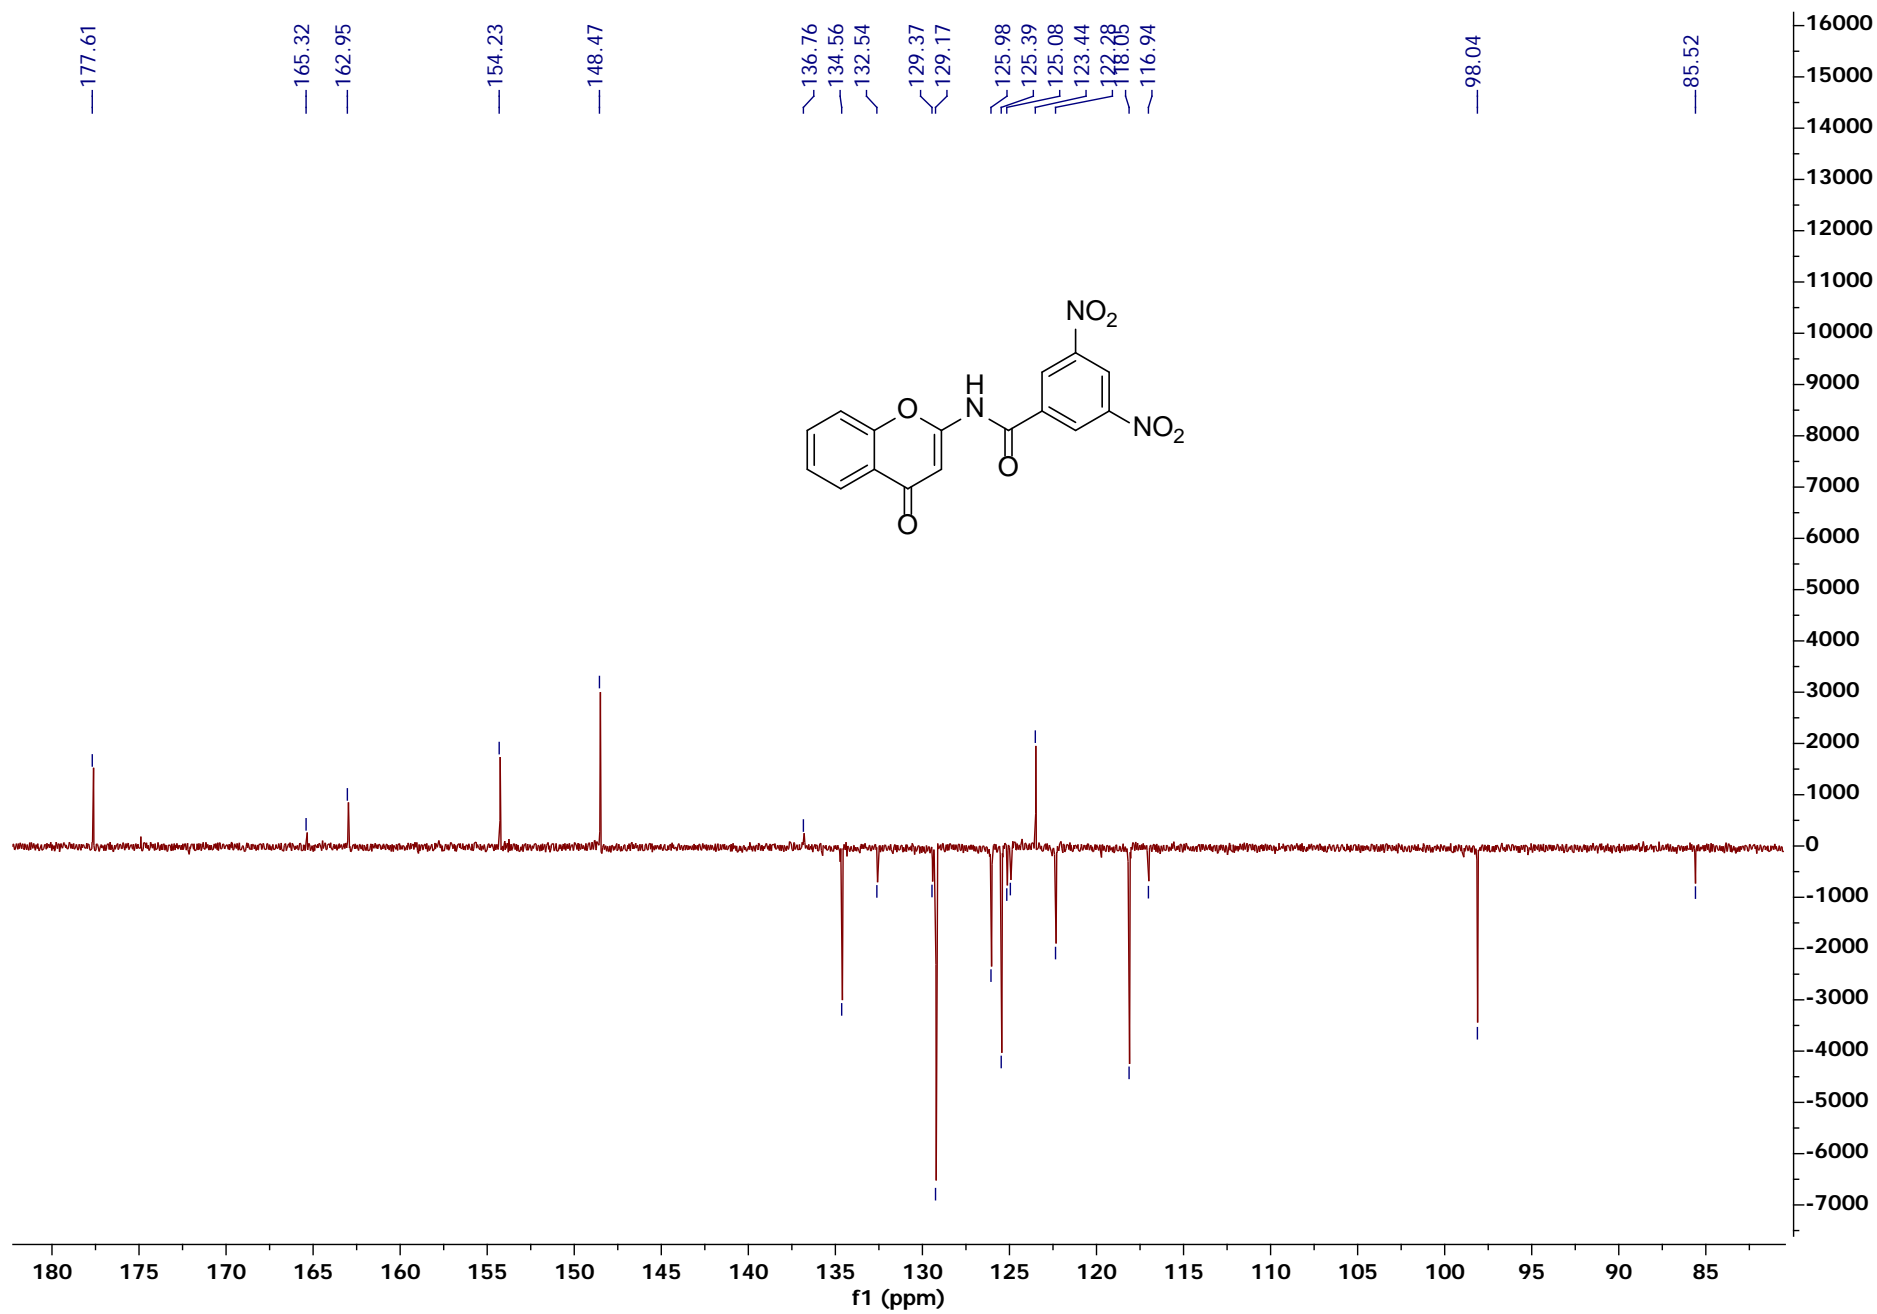

4-Methoxy-N-(4-oxo-4H-chromen-2-yl)benzamide (6p)

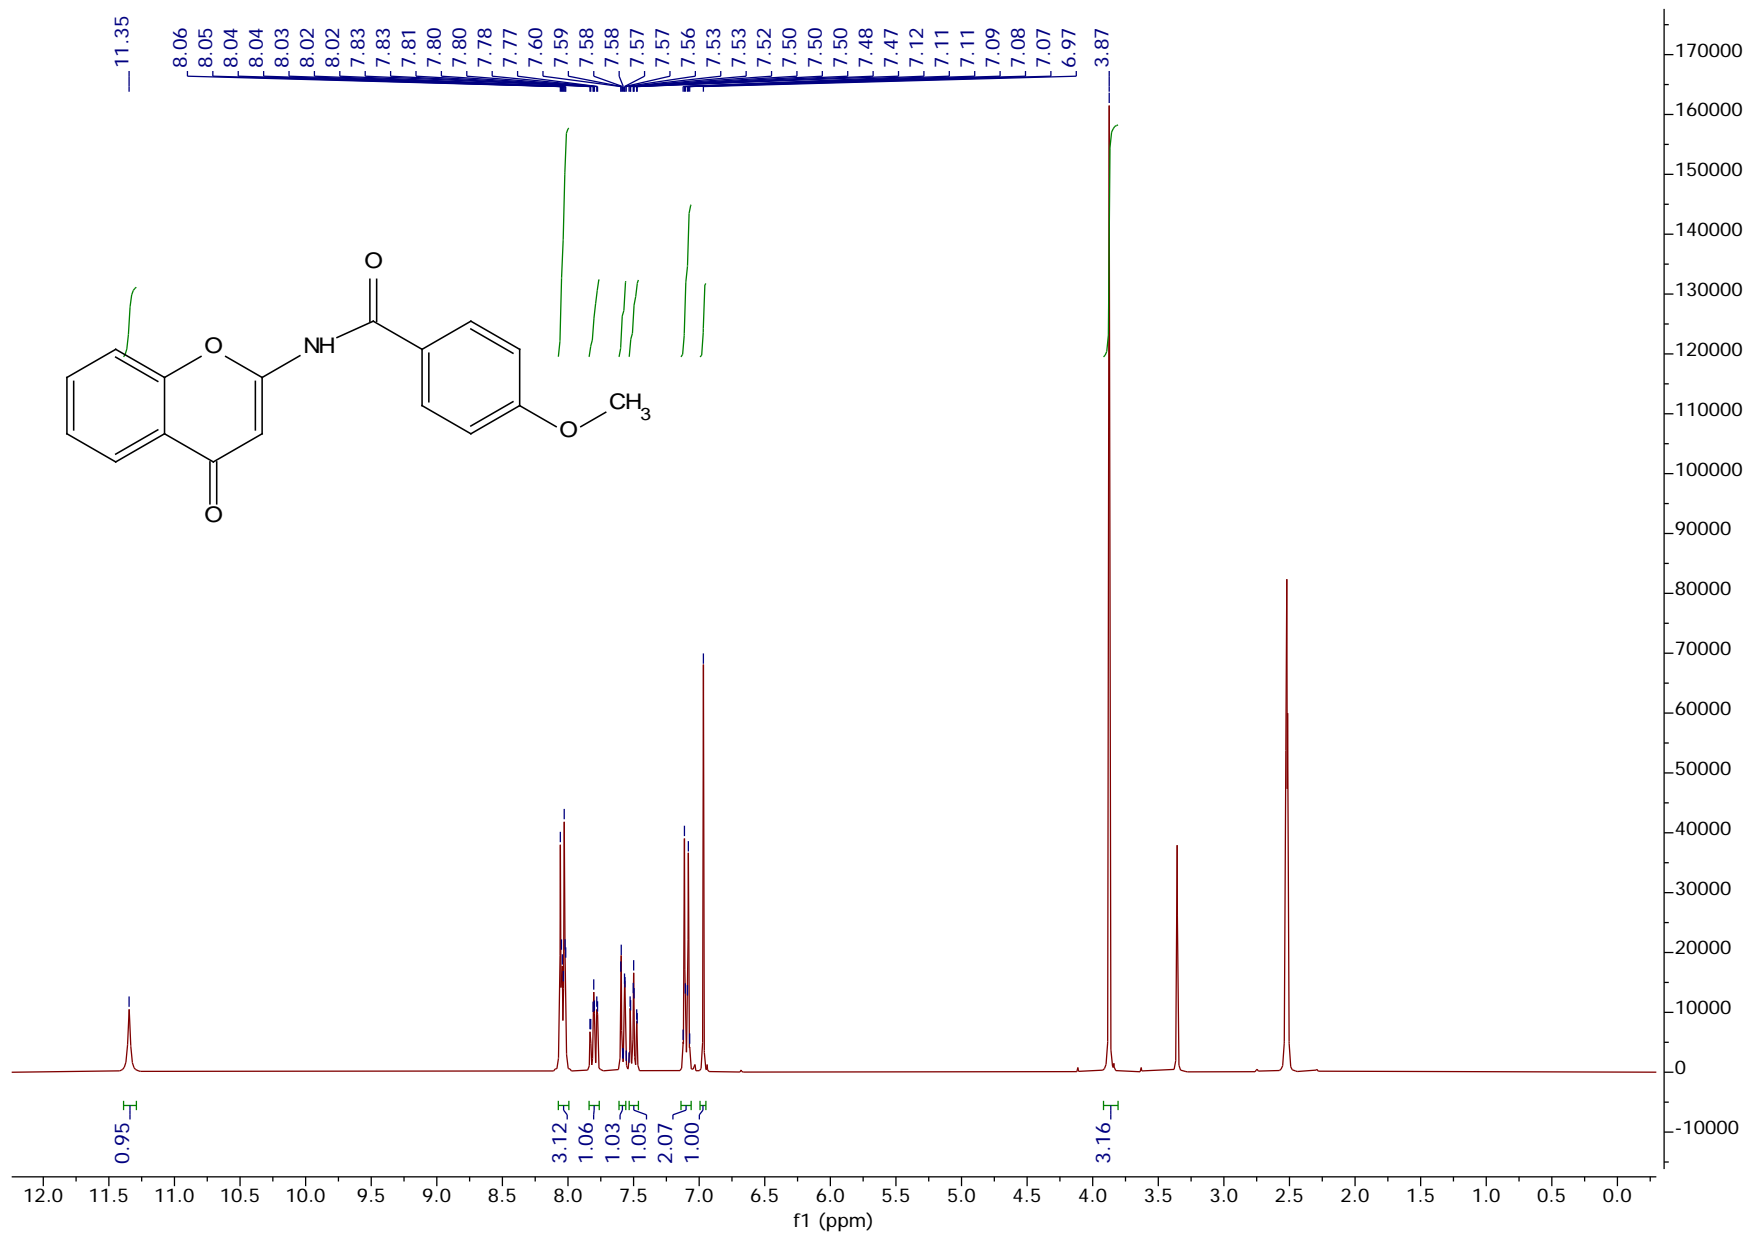

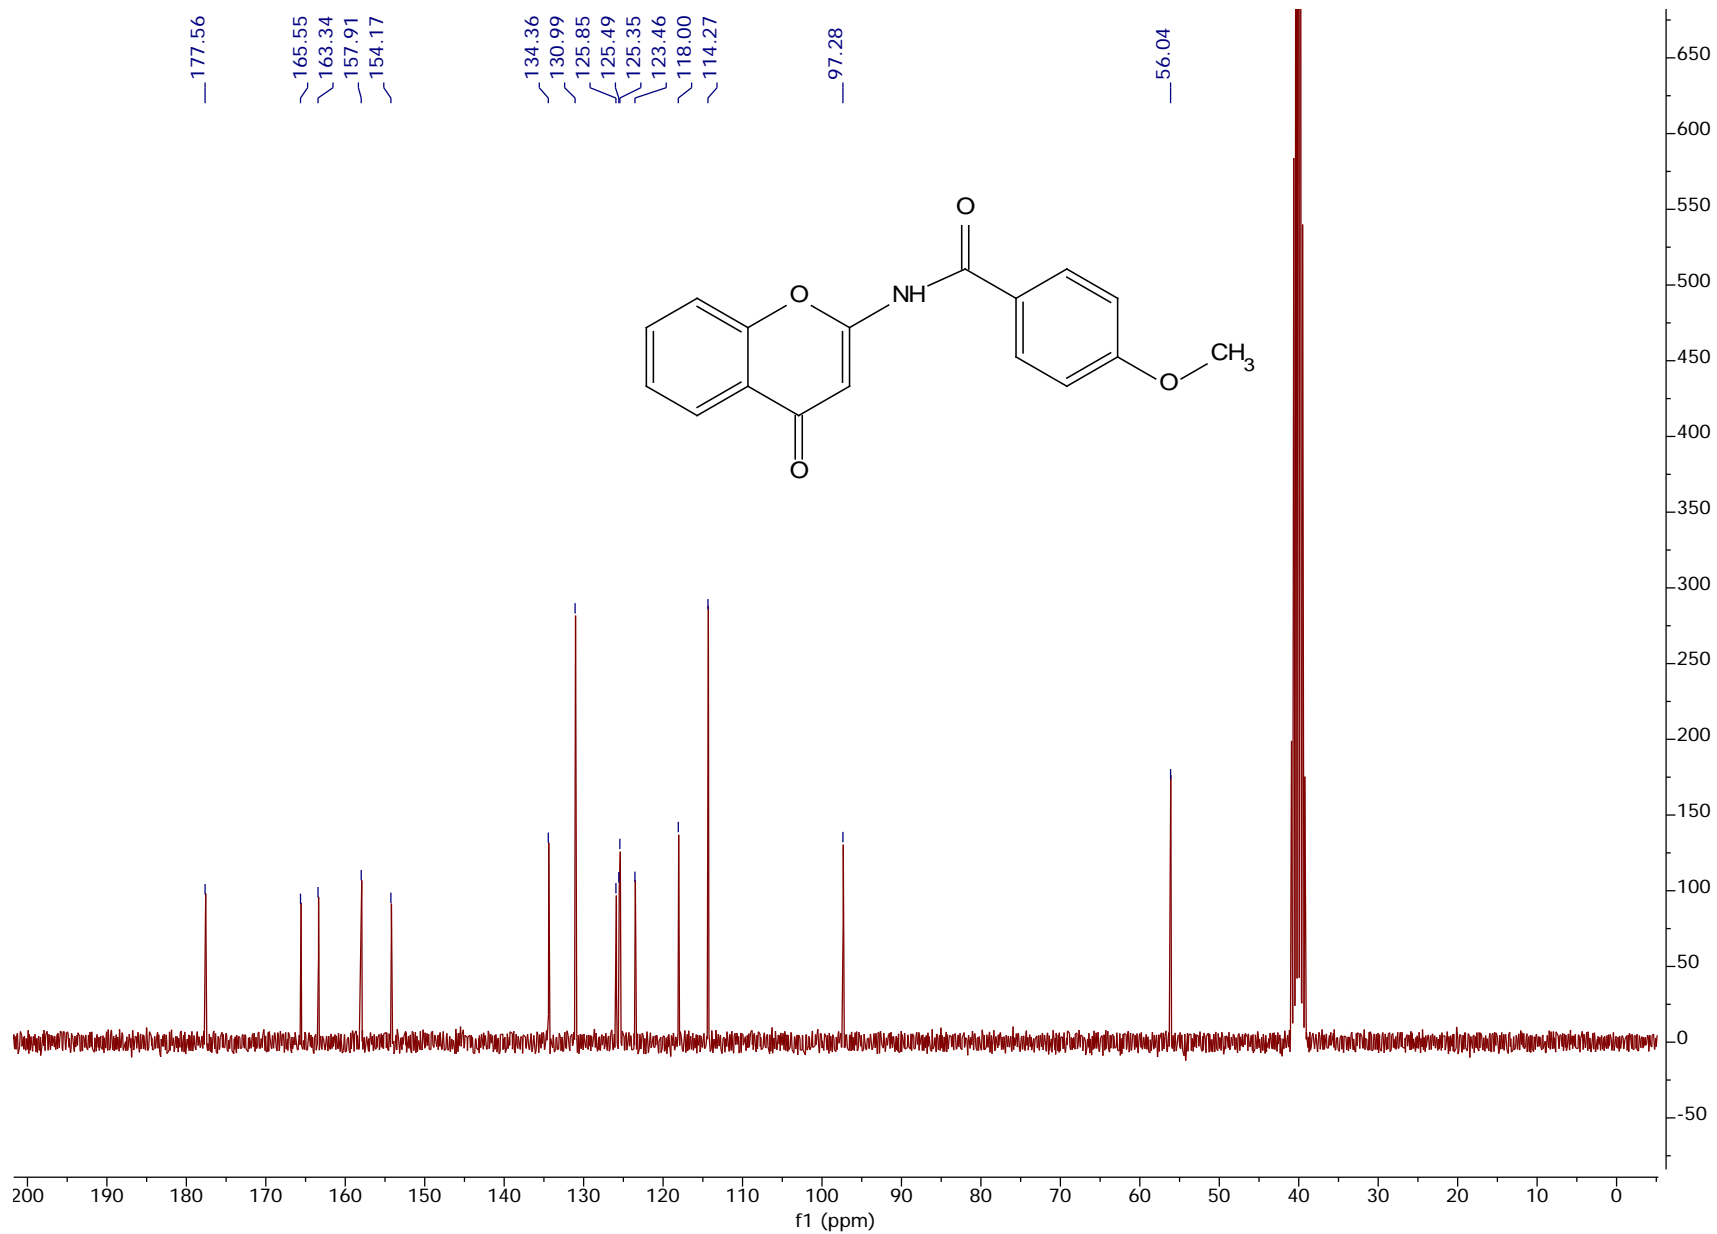

2-Methoxy-*N*-(4-oxo-4*H*-chromen-2-yl)benzamide (6q)

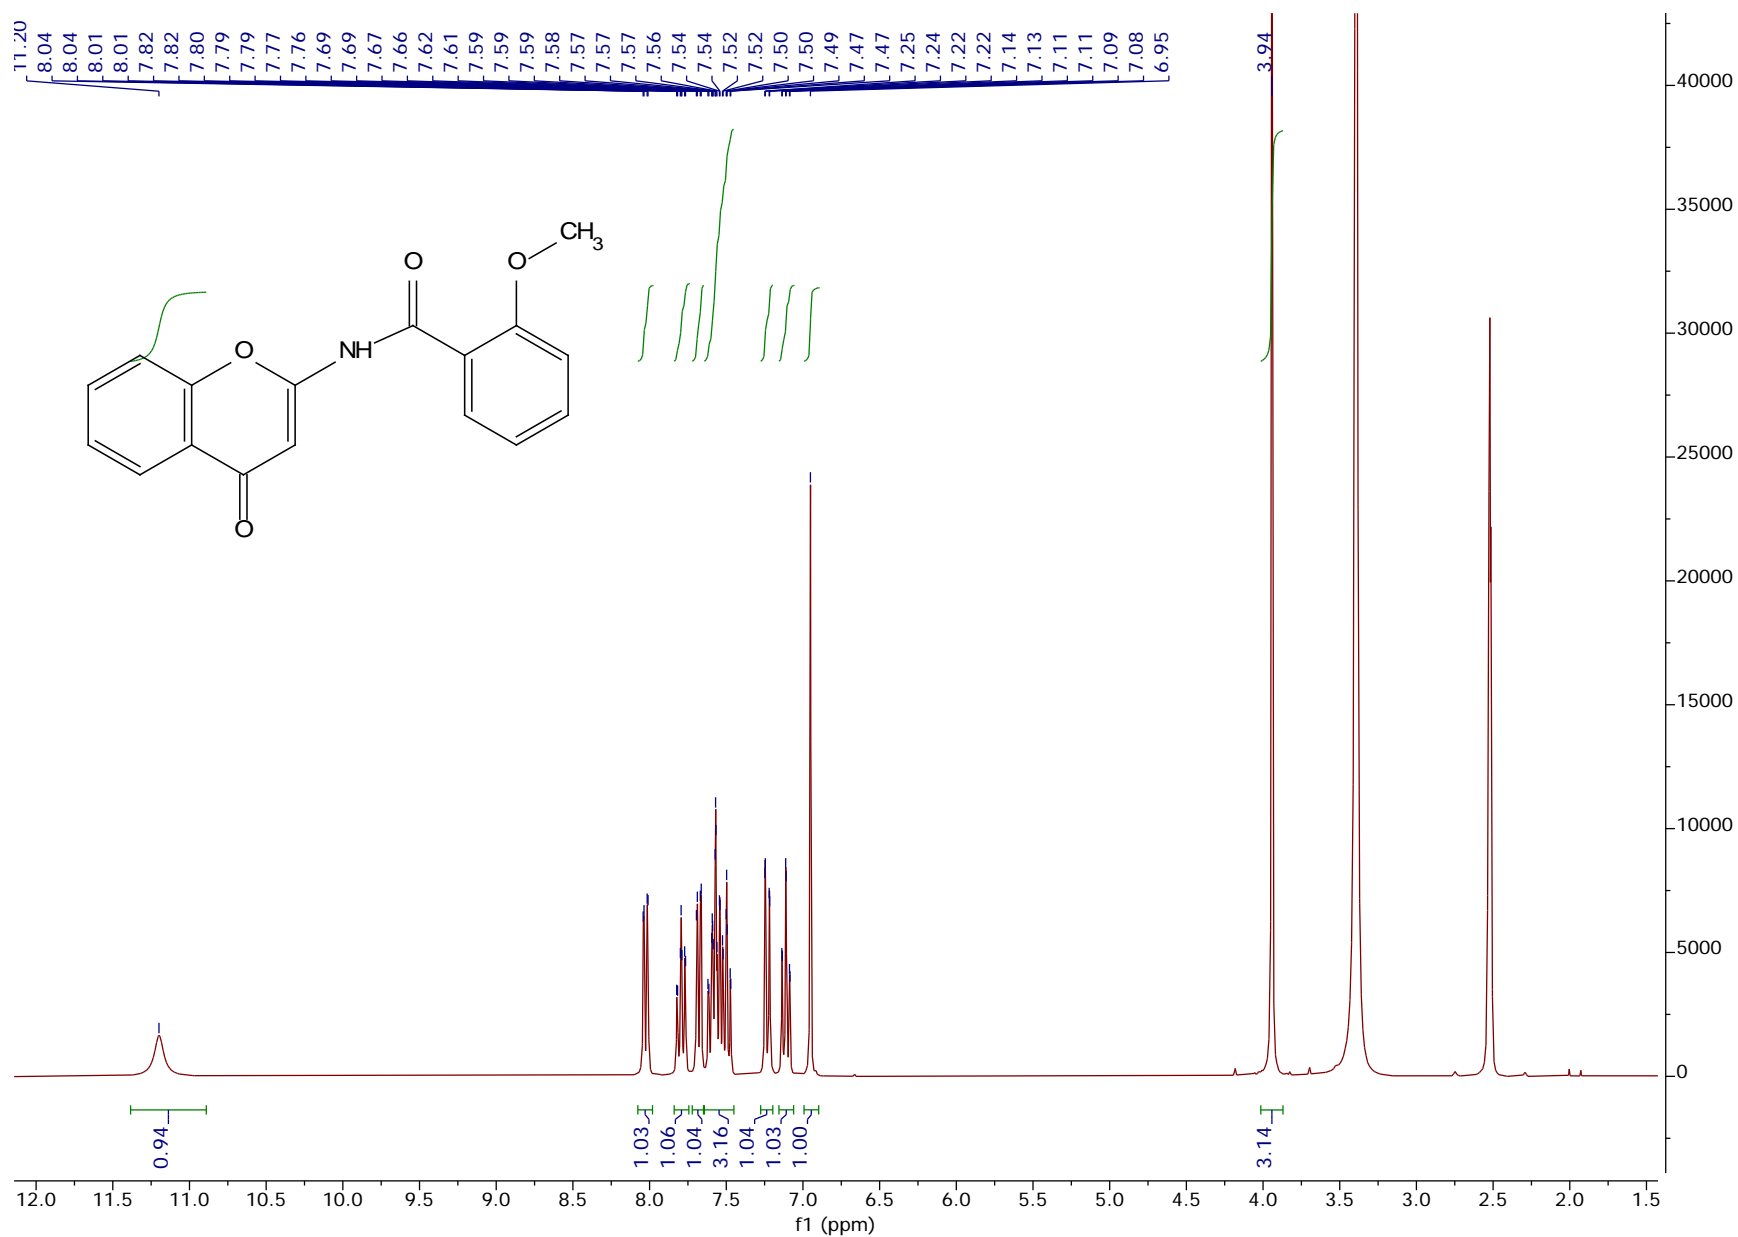

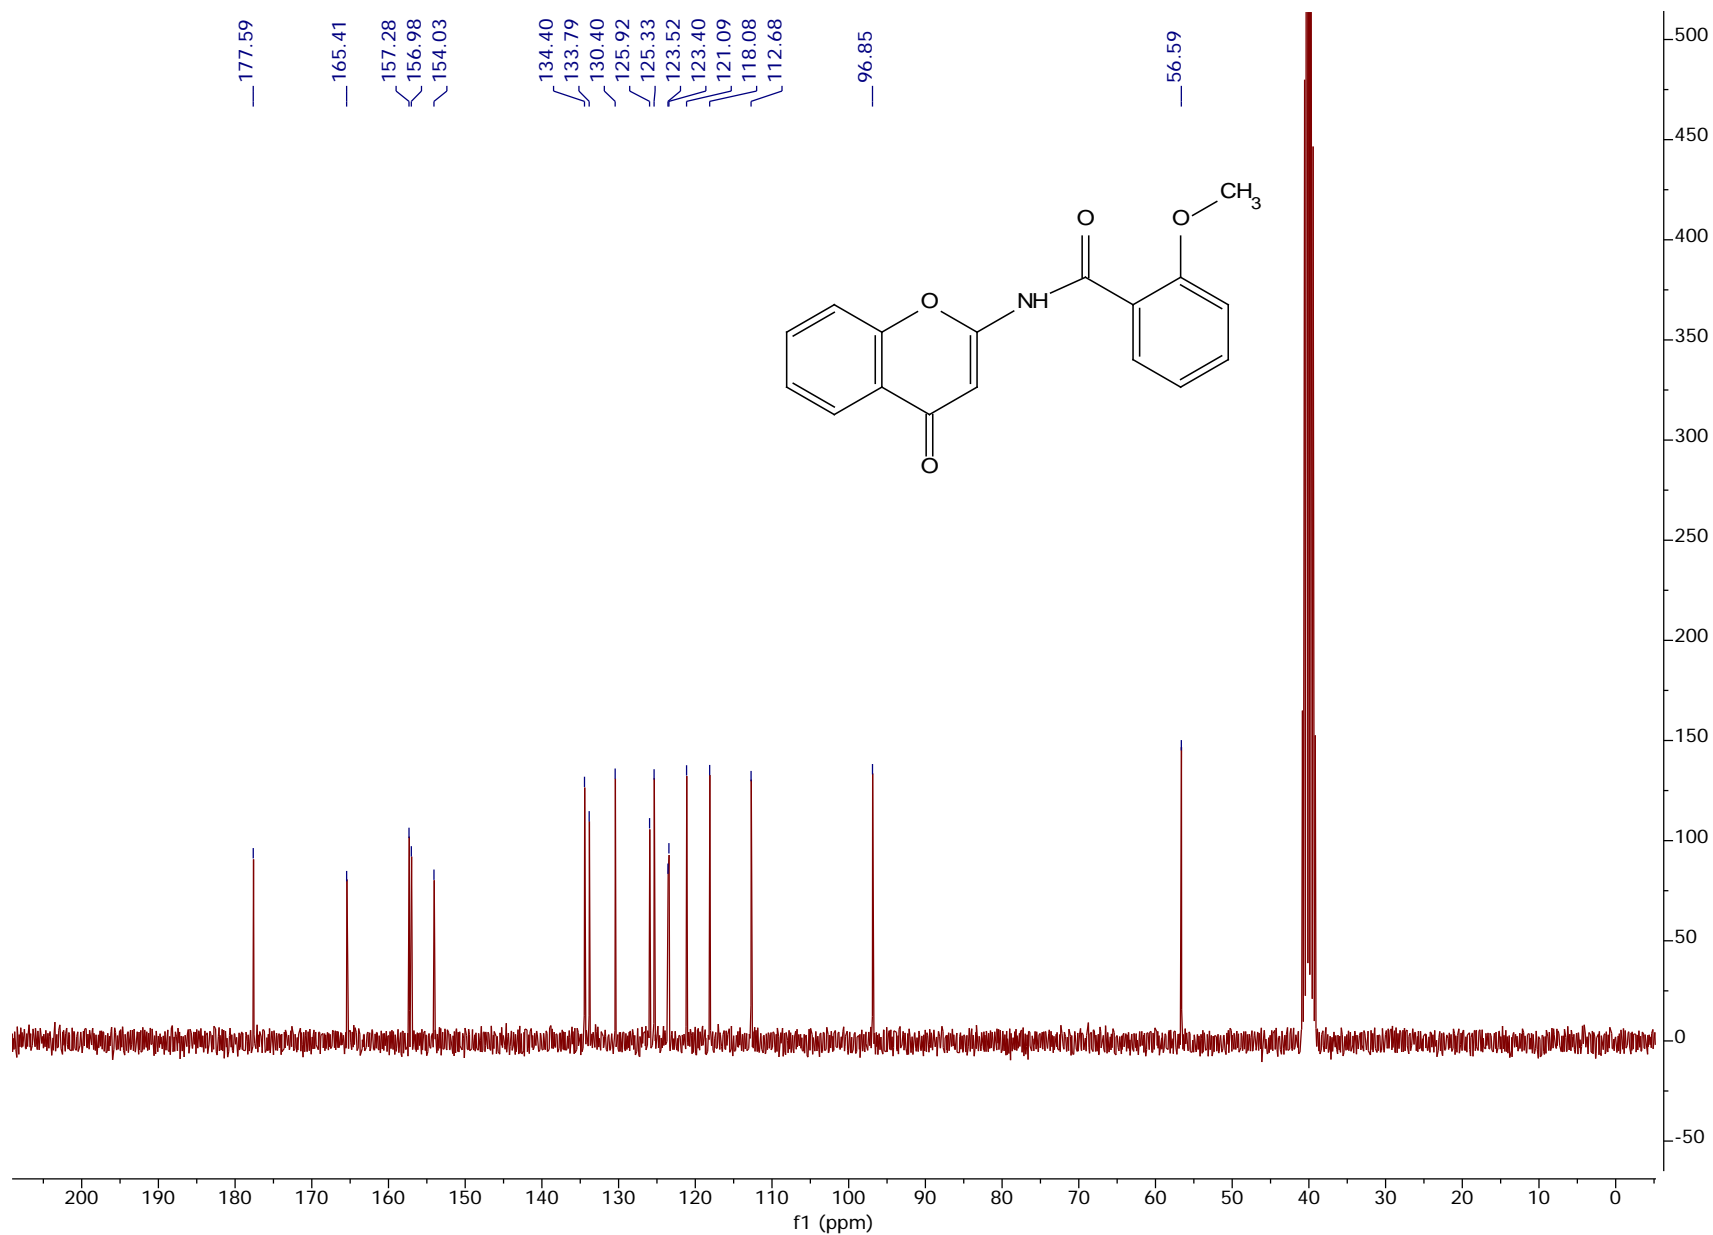



2-(Methylthio)-*N*-(4-oxo-4*H*-chromen-2-yl)benzamide (6r)

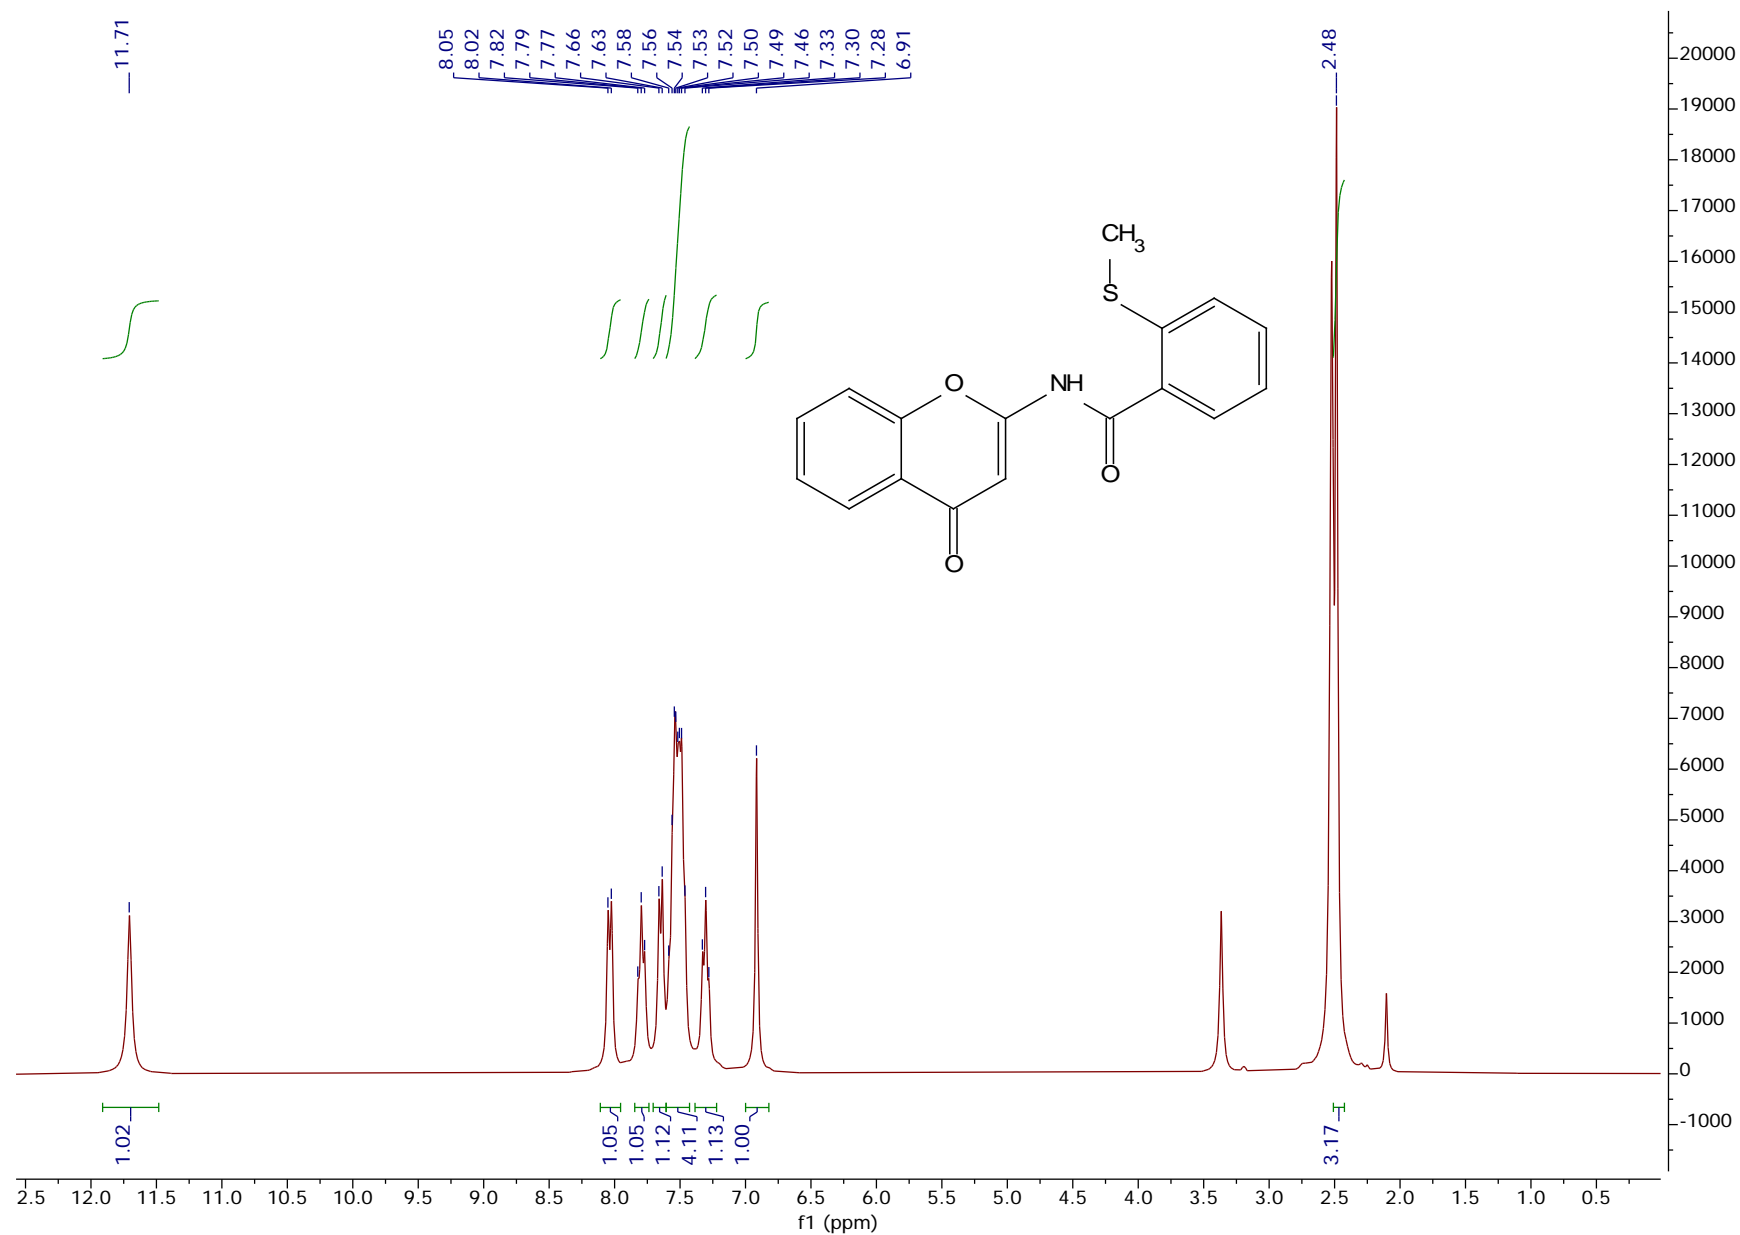

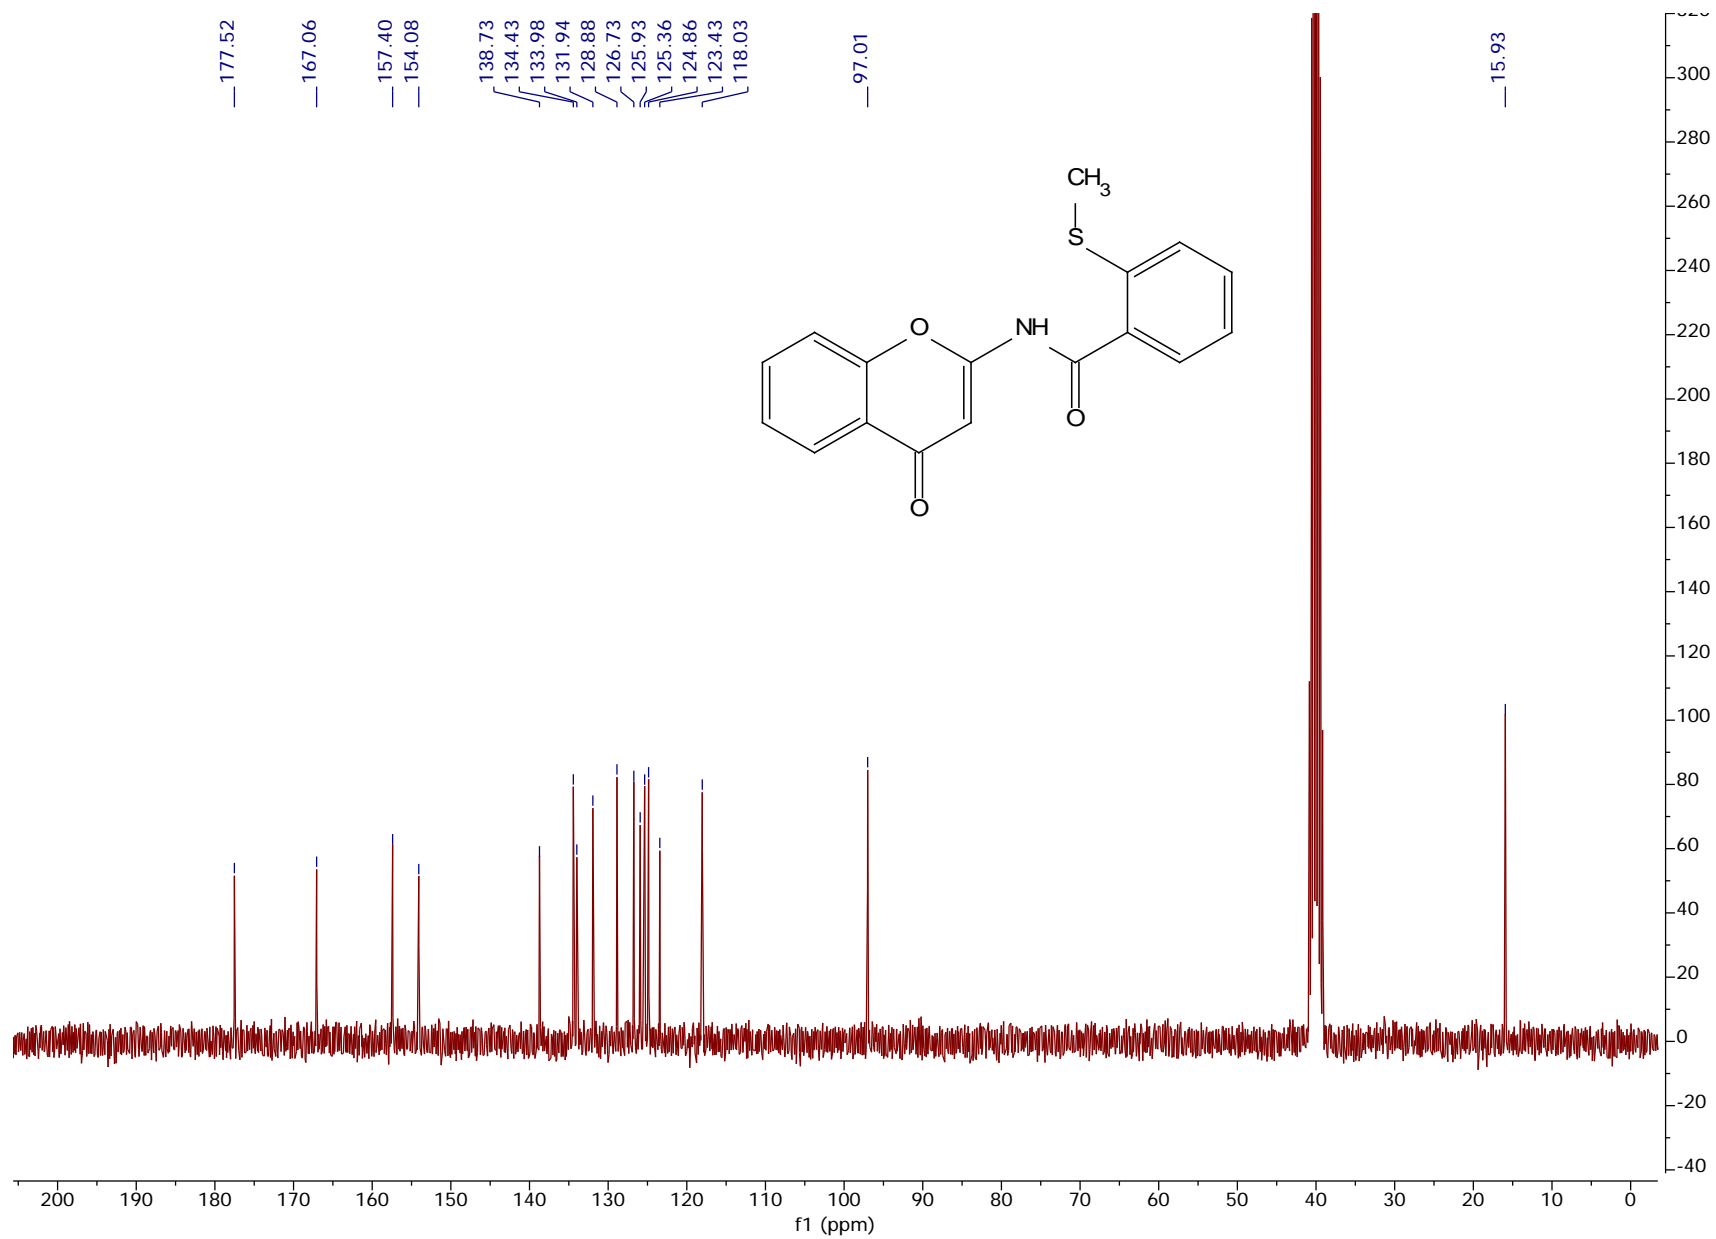

3,4-Dimethoxy-N-(4-oxo-4H-chromen-2-yl)benzamide (6s)

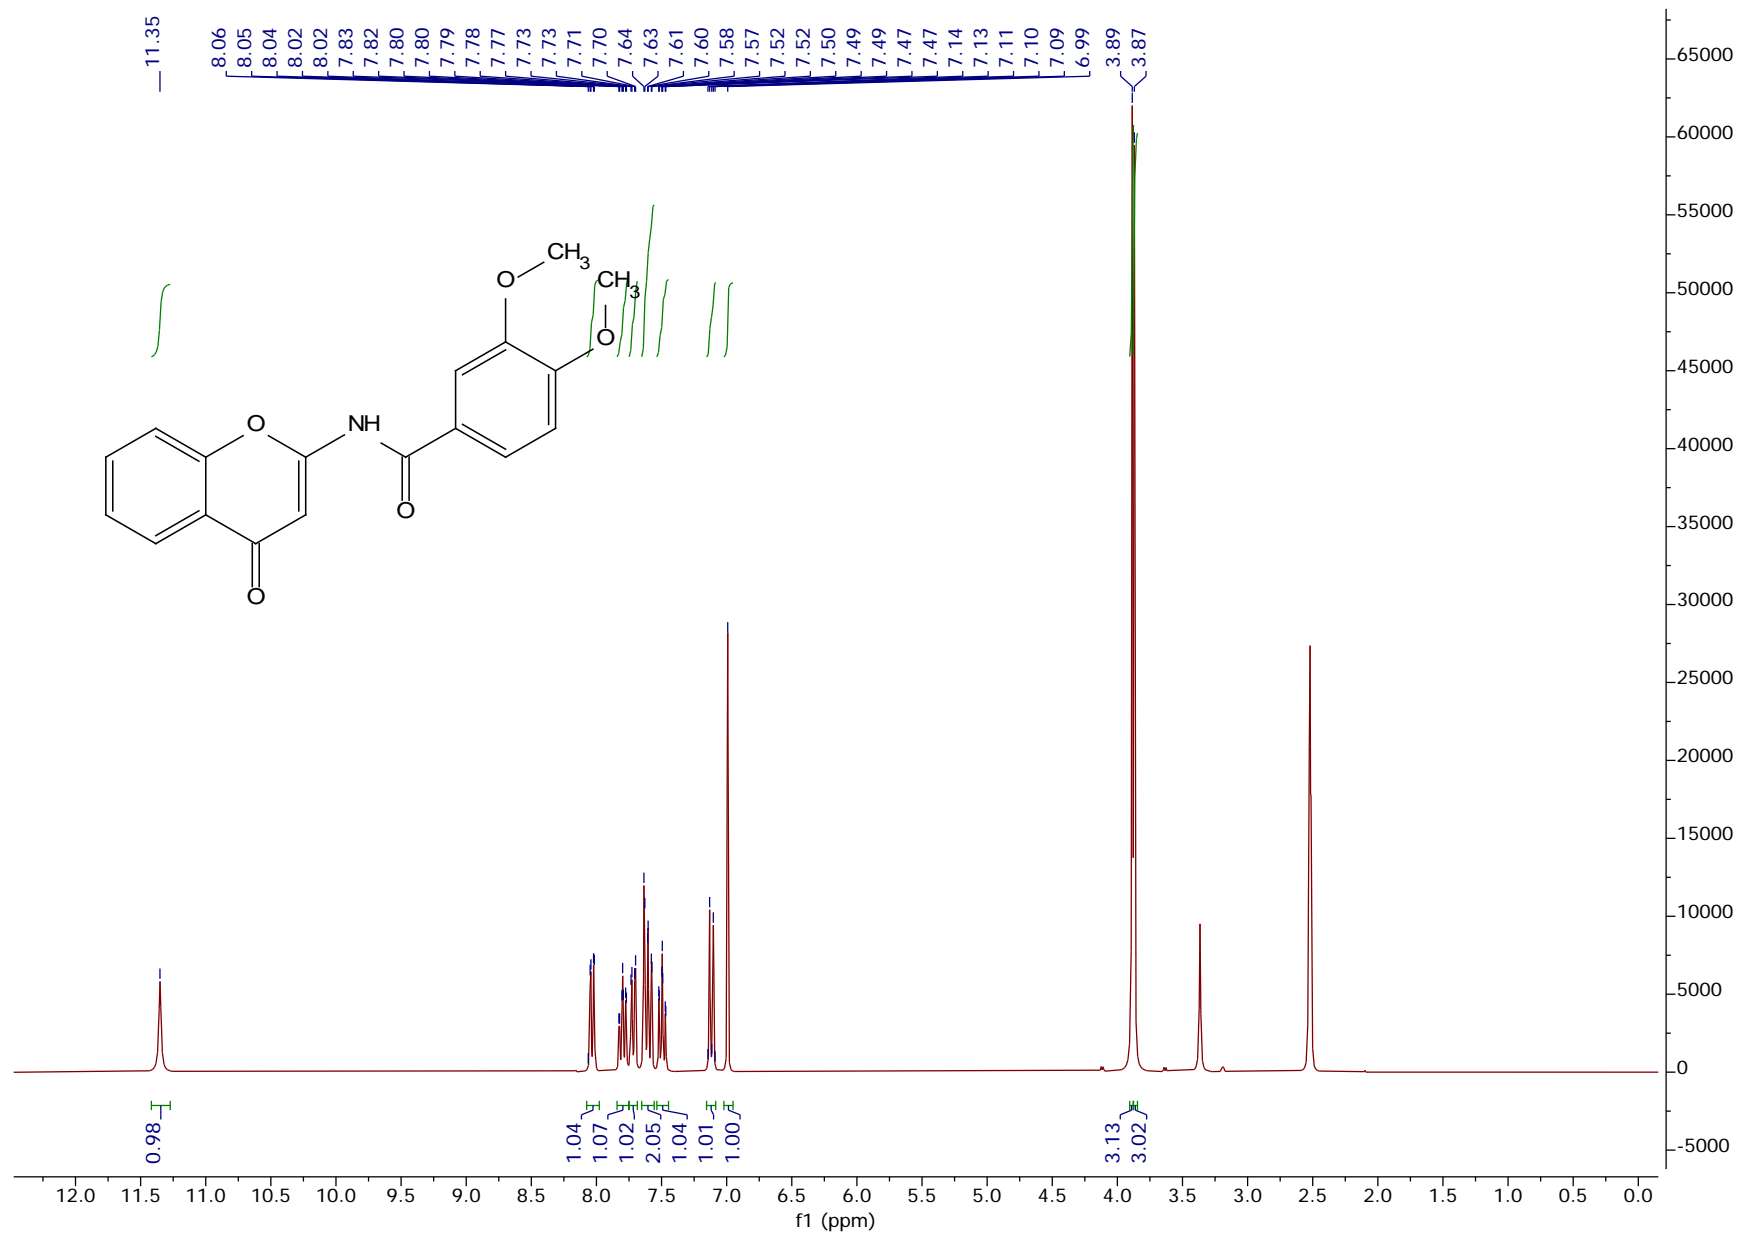

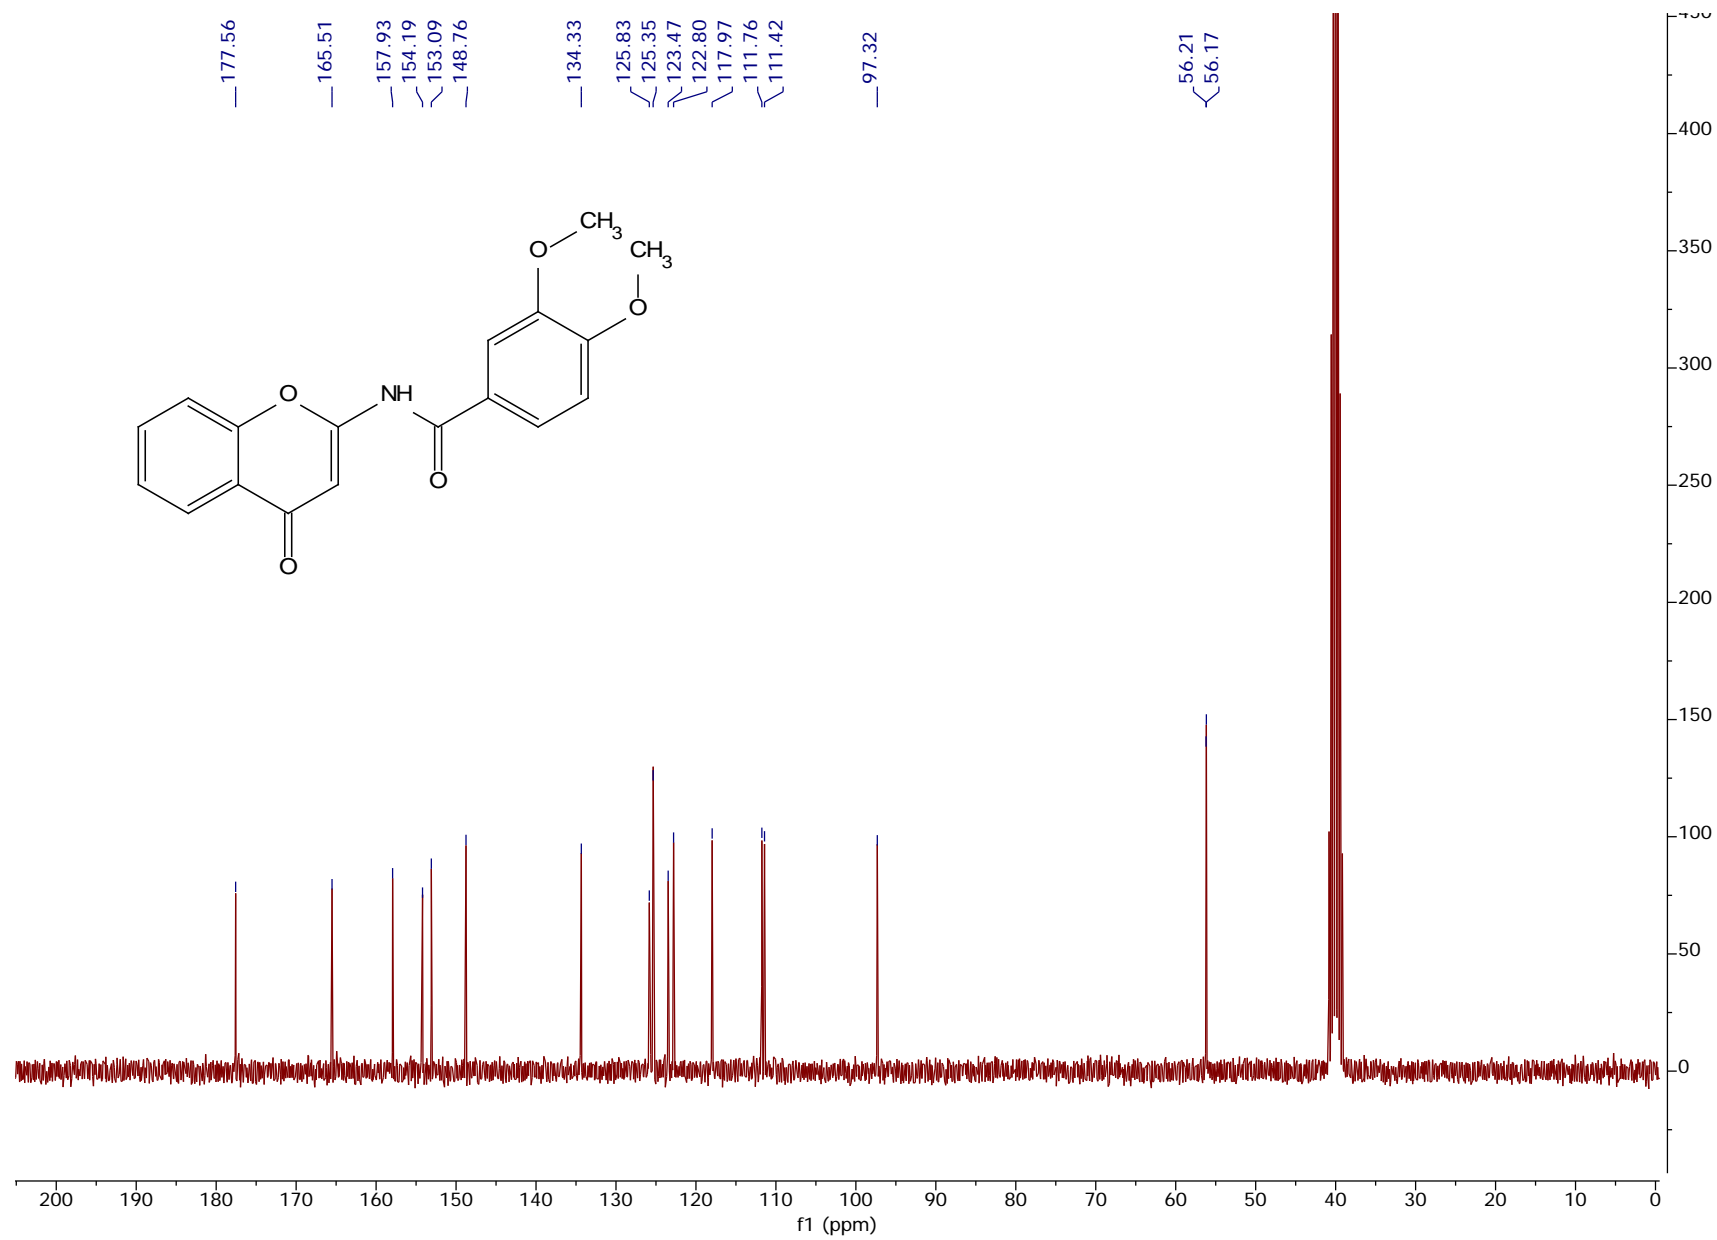

# 3,5-Dimethoxy-N-(4-oxo-4H-chromen-2-yl)benzamide (6t)

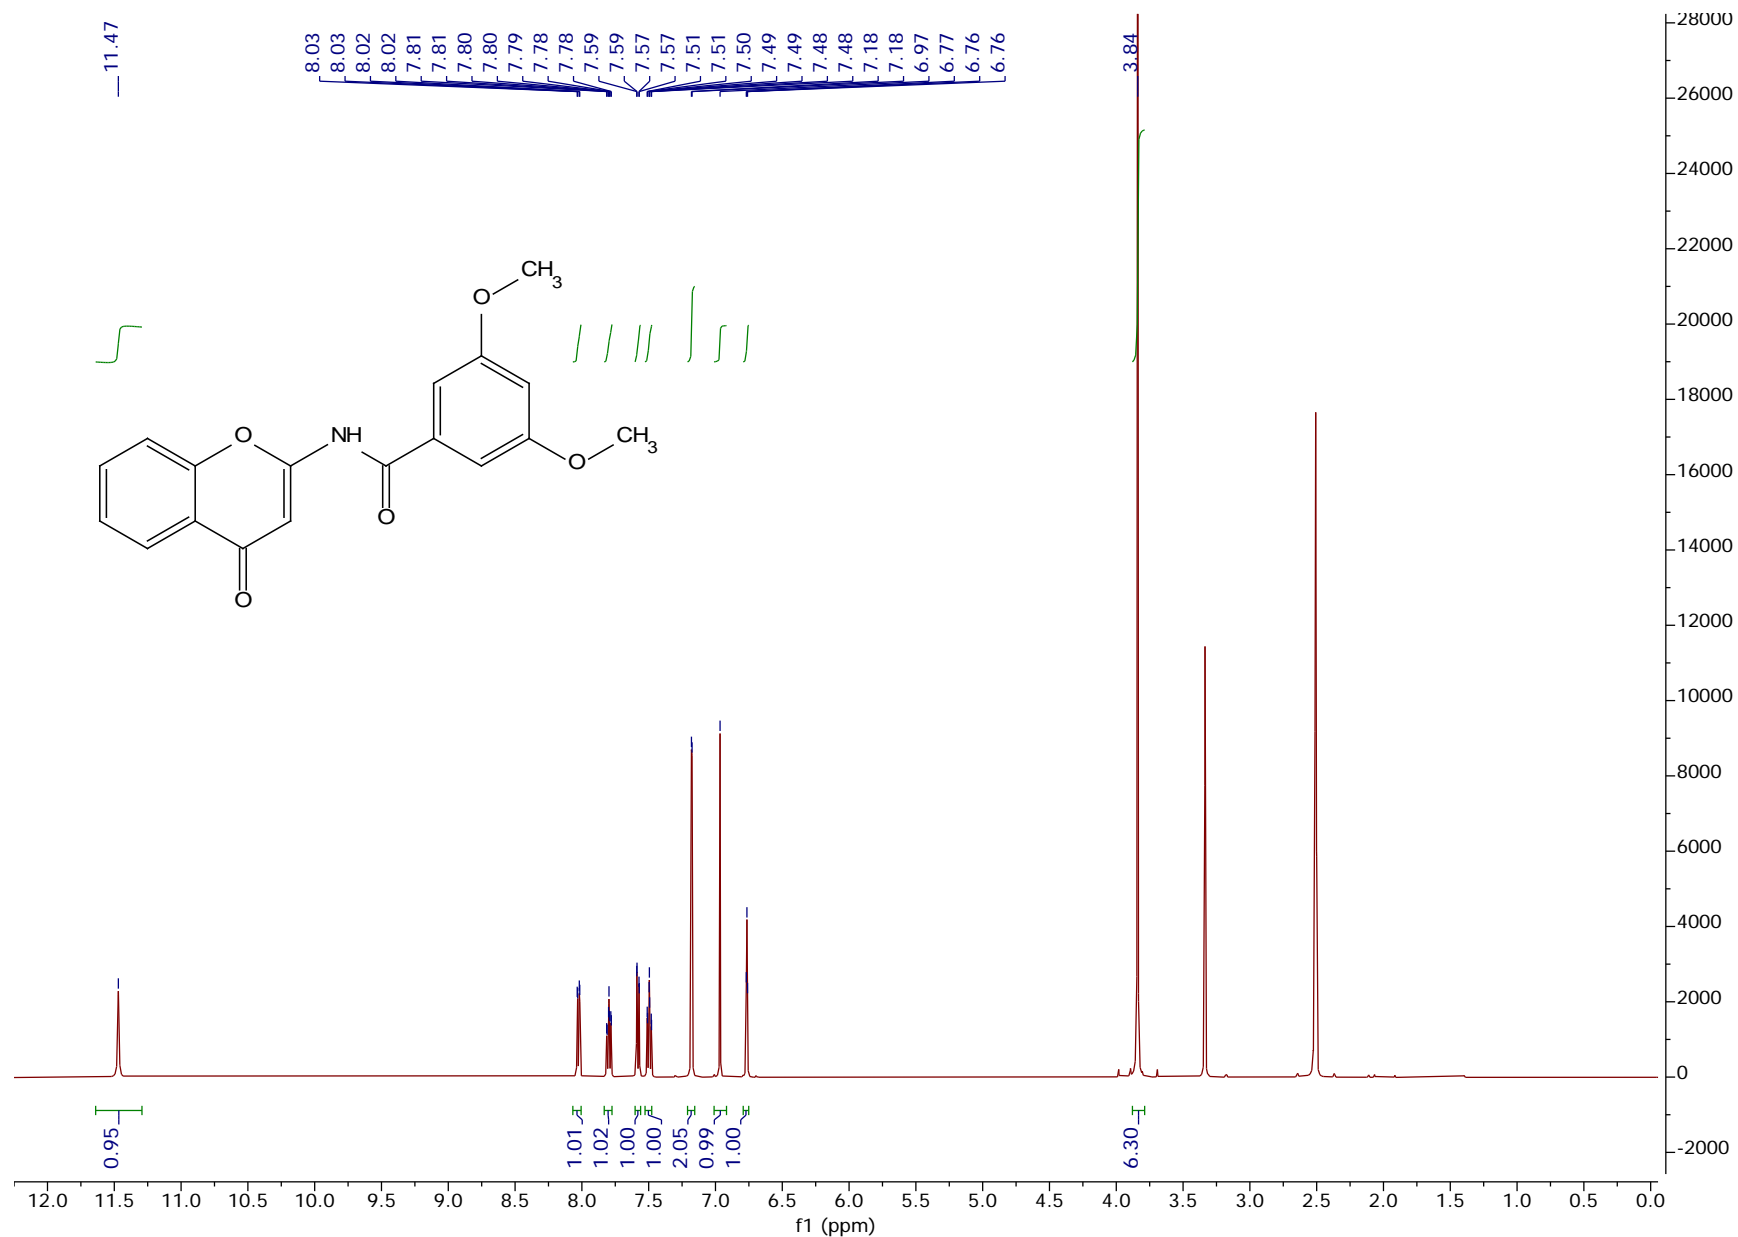

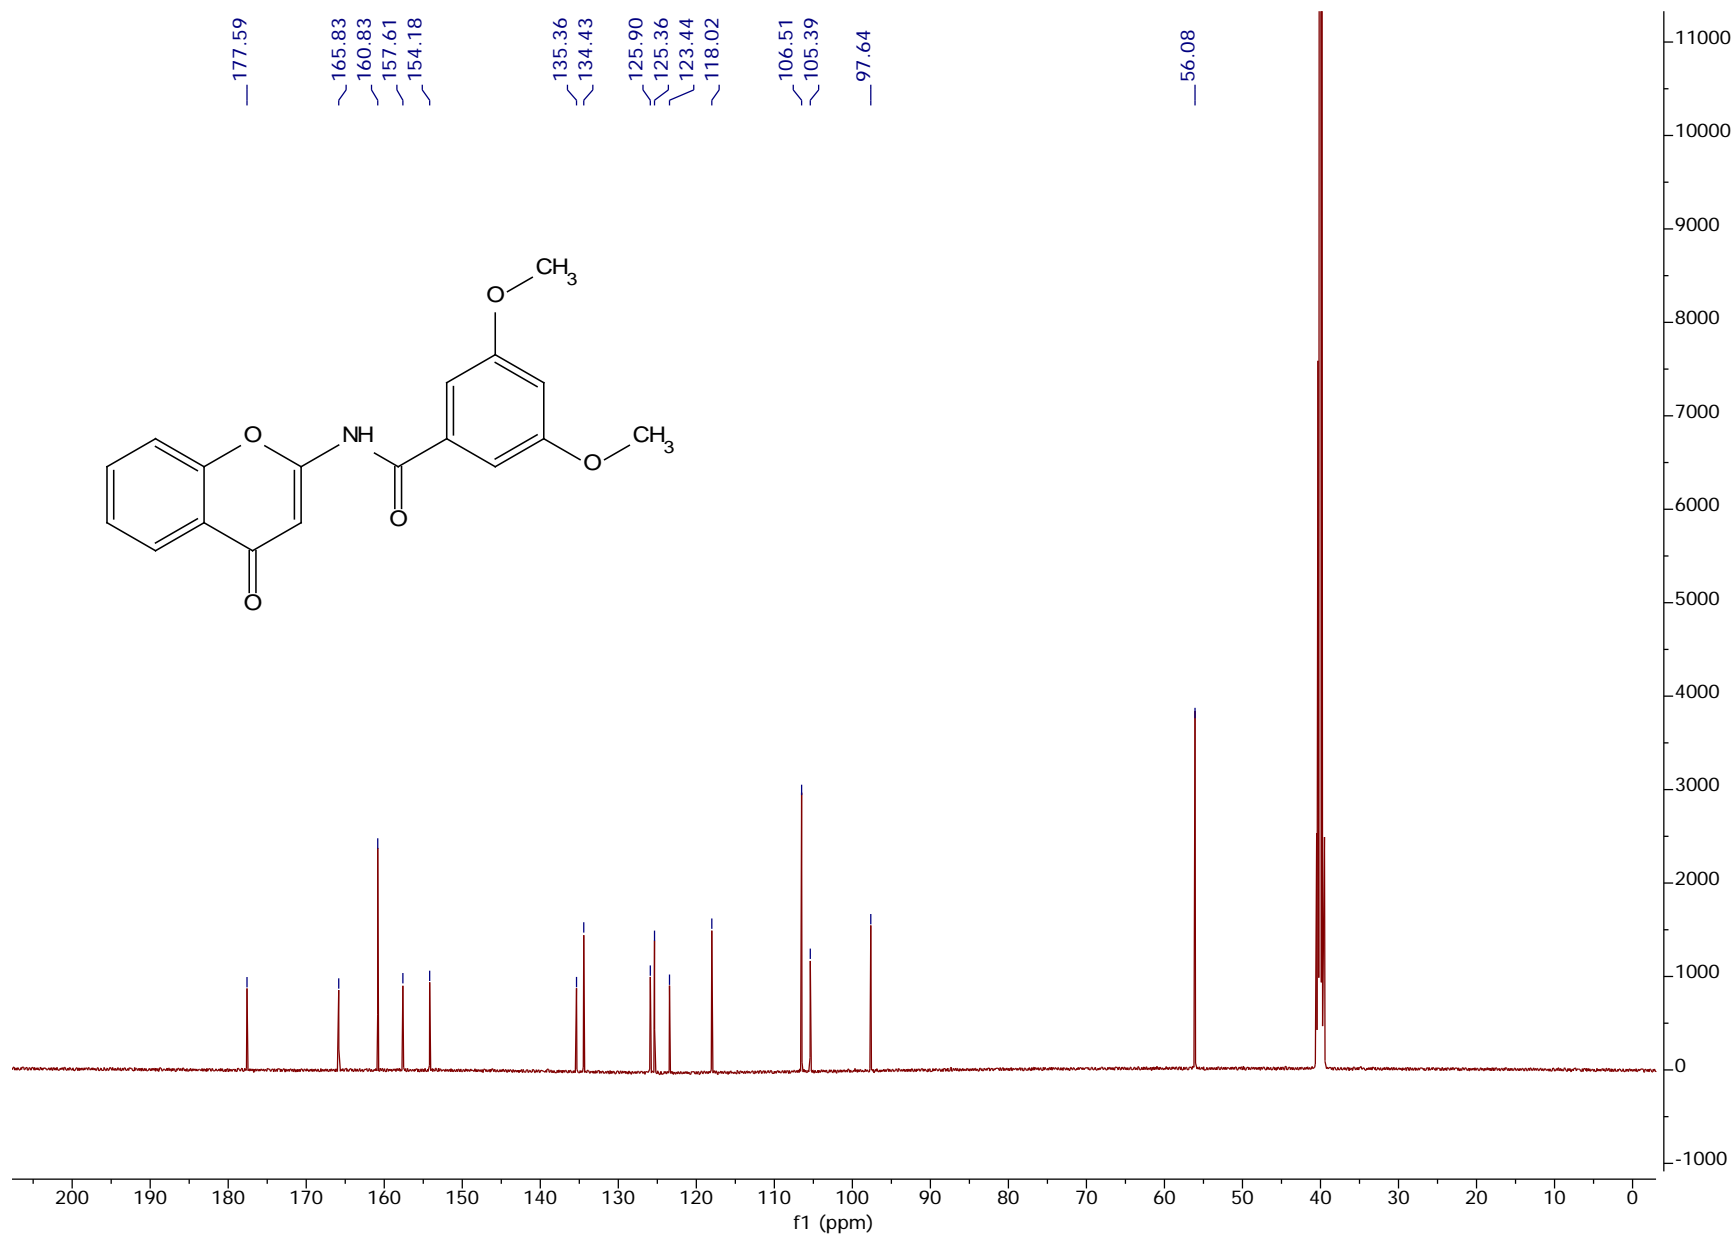

4-Morpholino-*N*-(4-oxo-4*H*-chromen-2-yl)benzamide (6u)

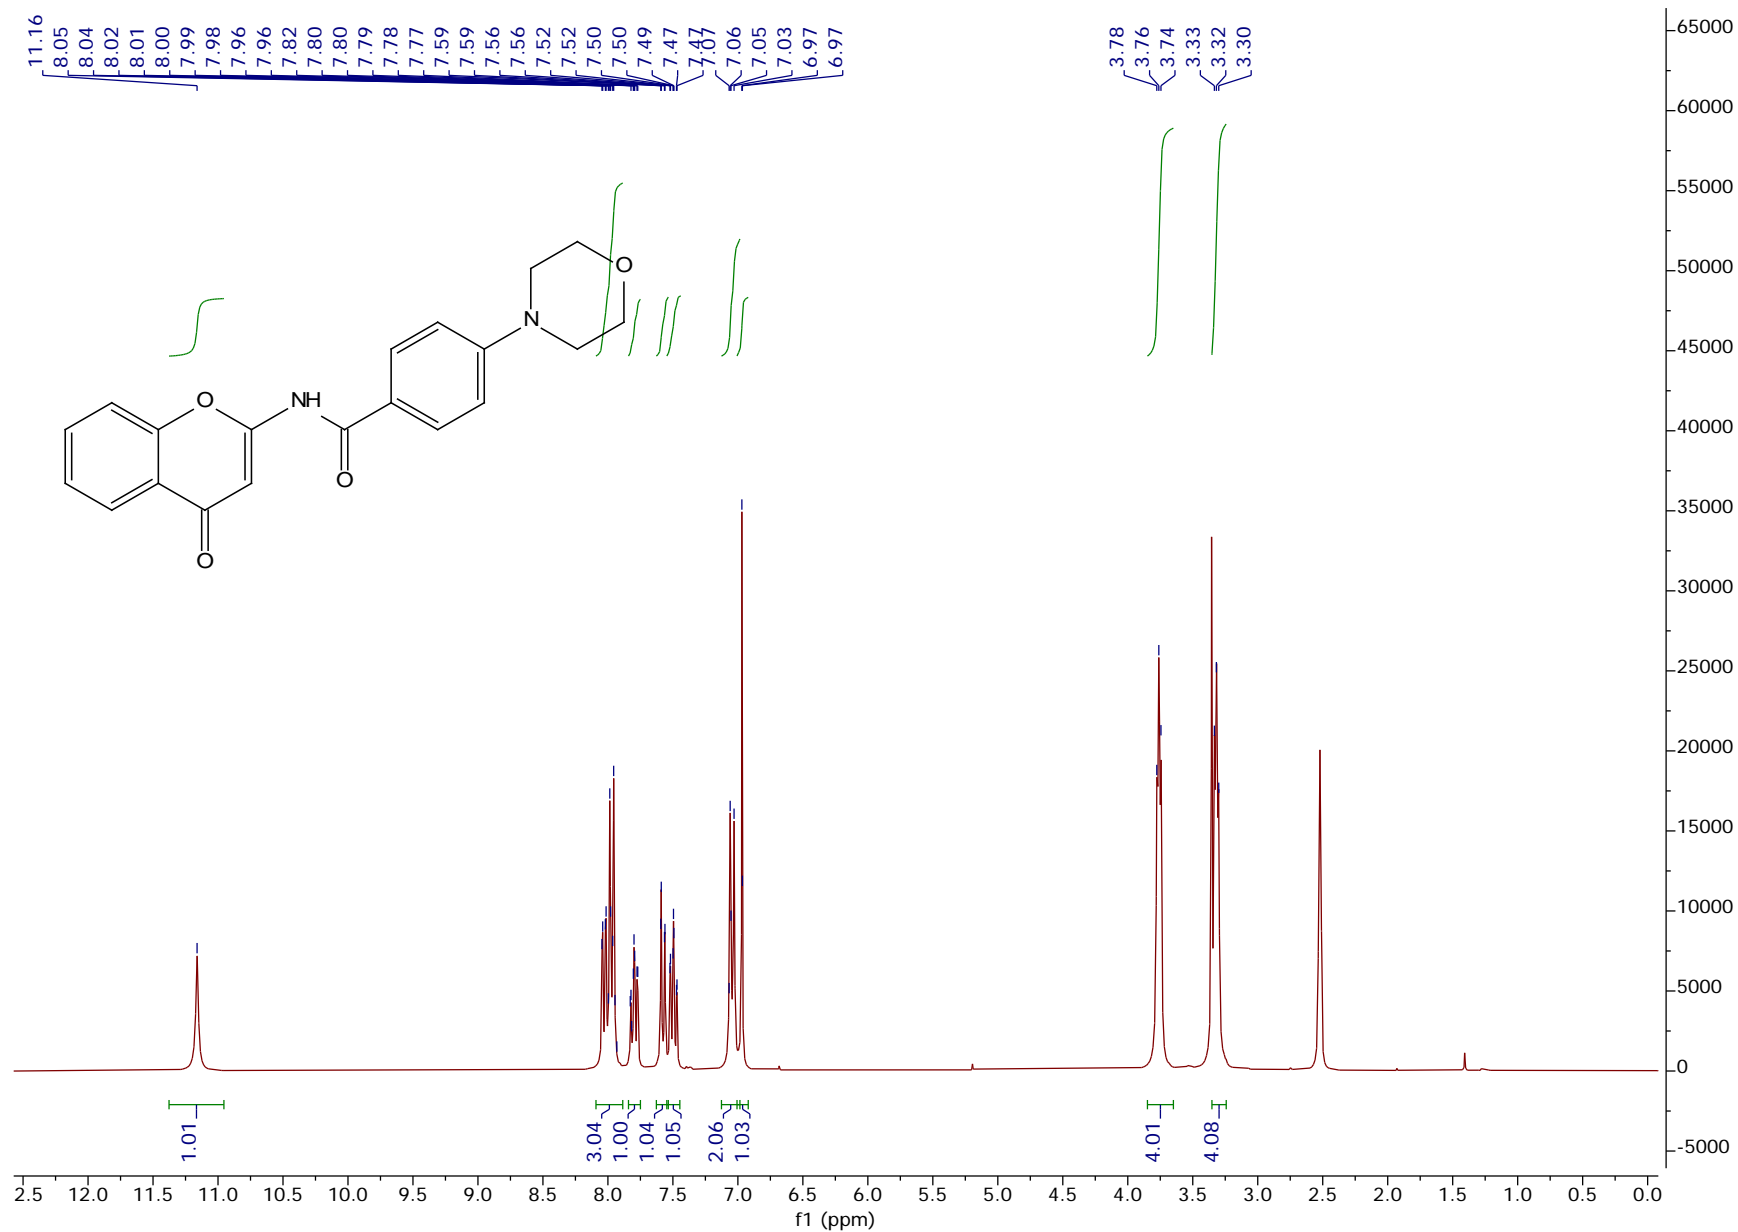

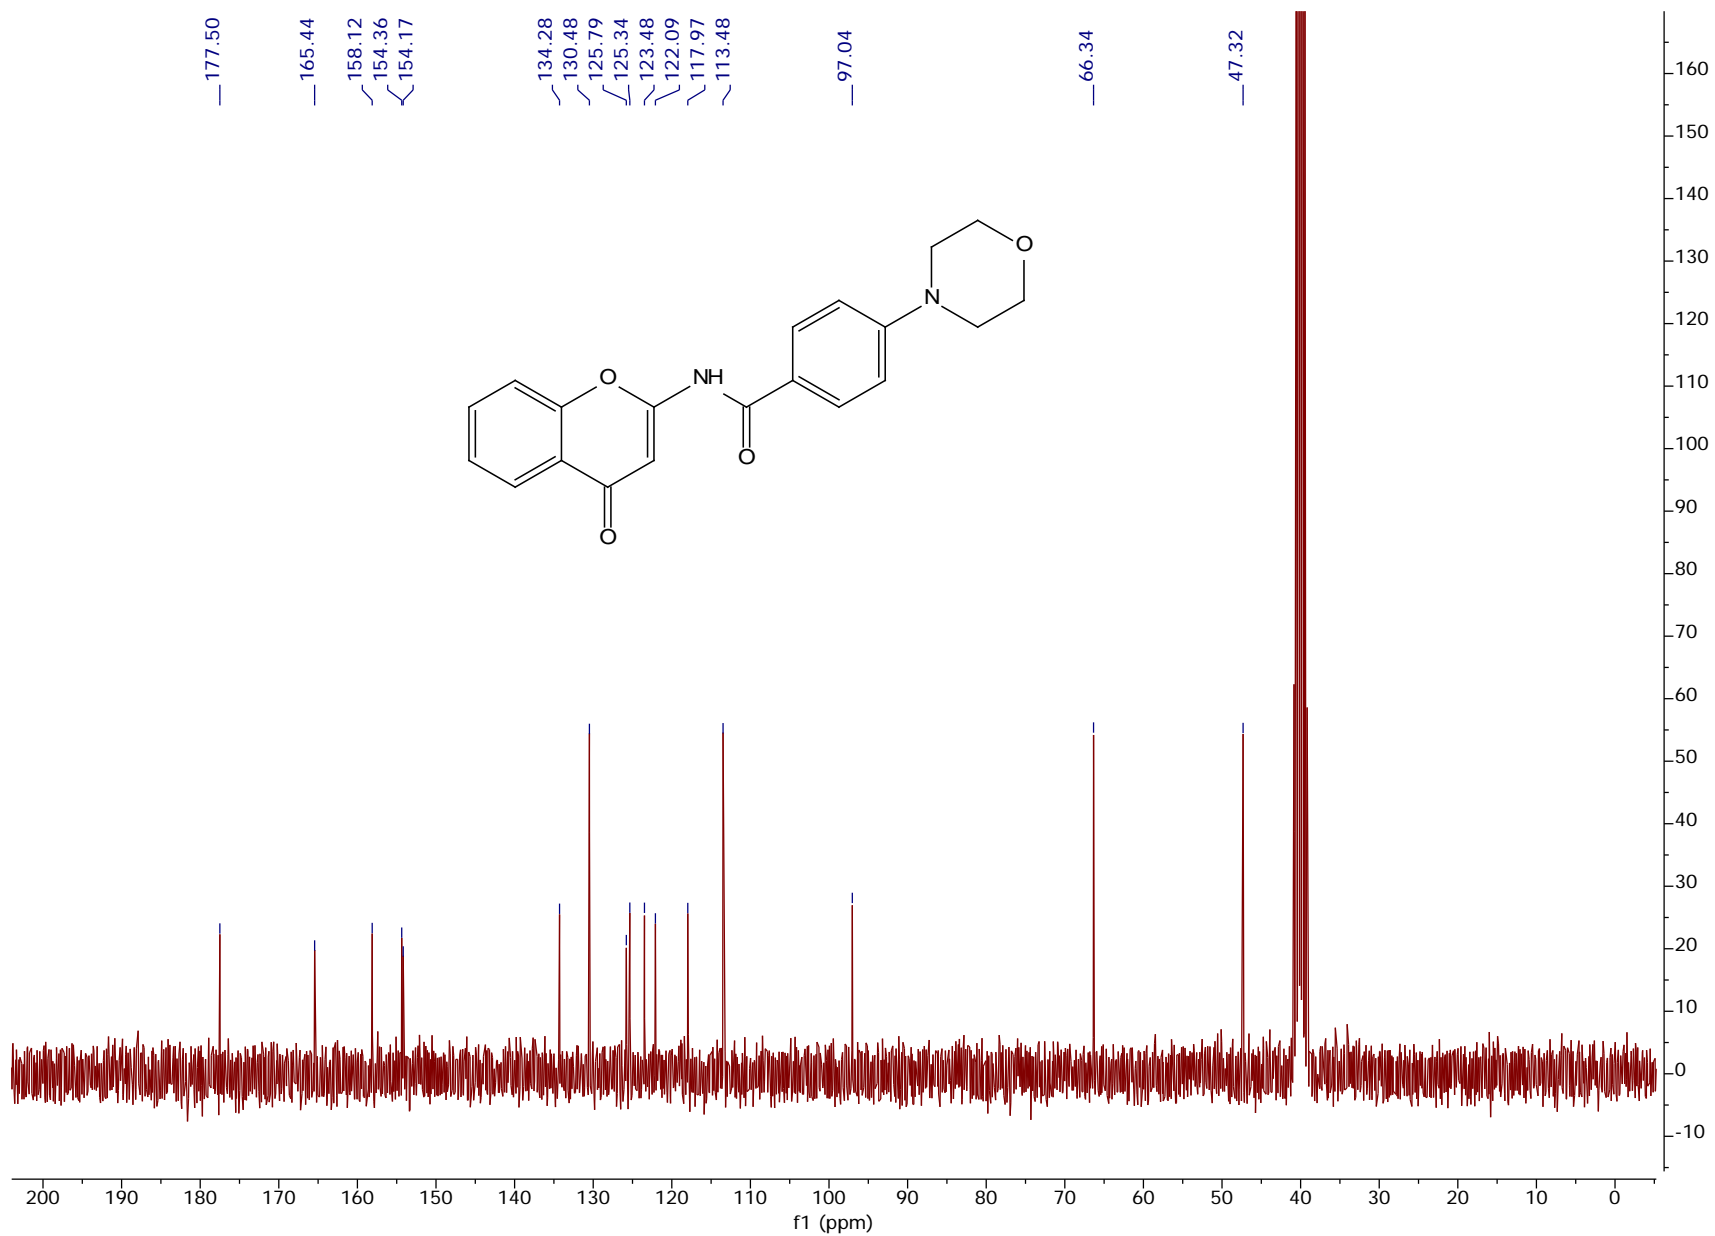



***N*-(4-Oxo-4*H*-chromen-2-yl)pyrimidine-2-carboxamide (6v)**

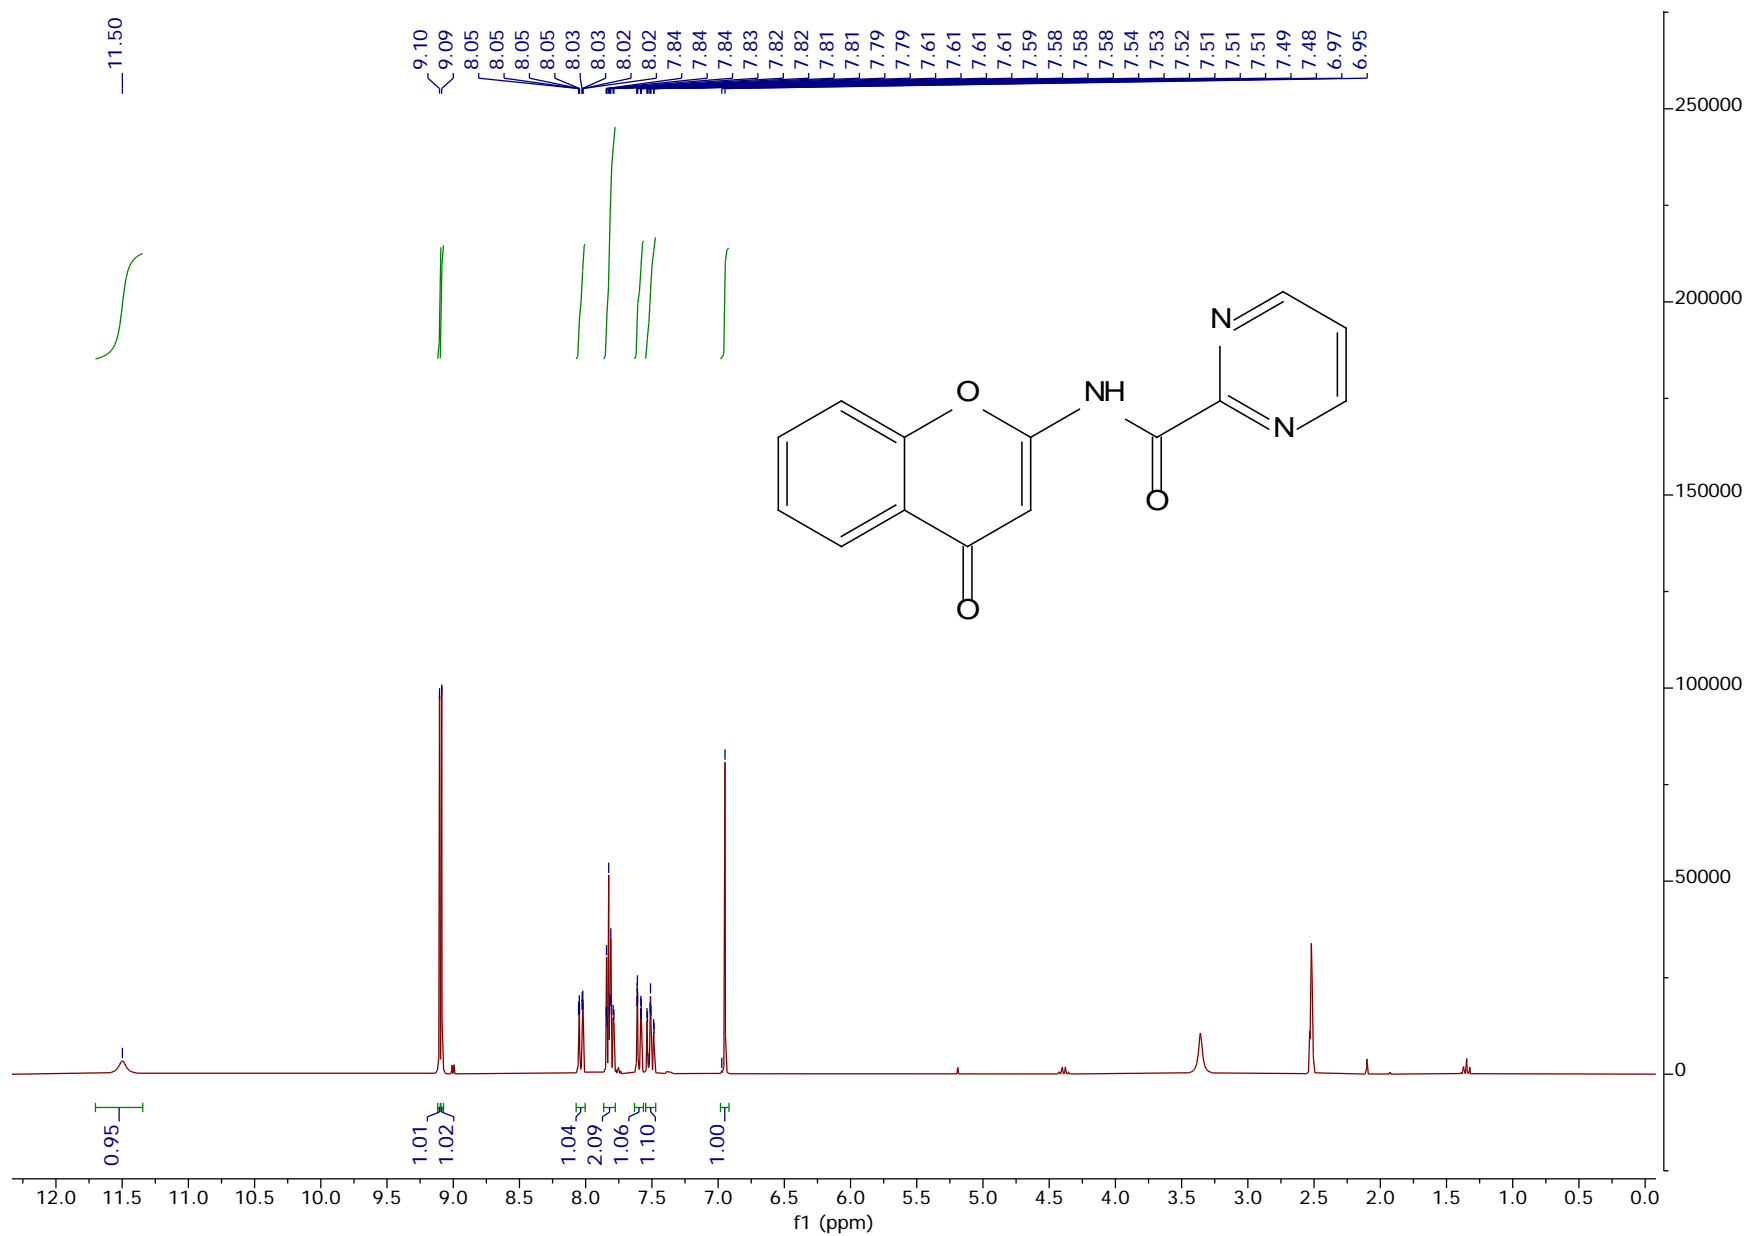

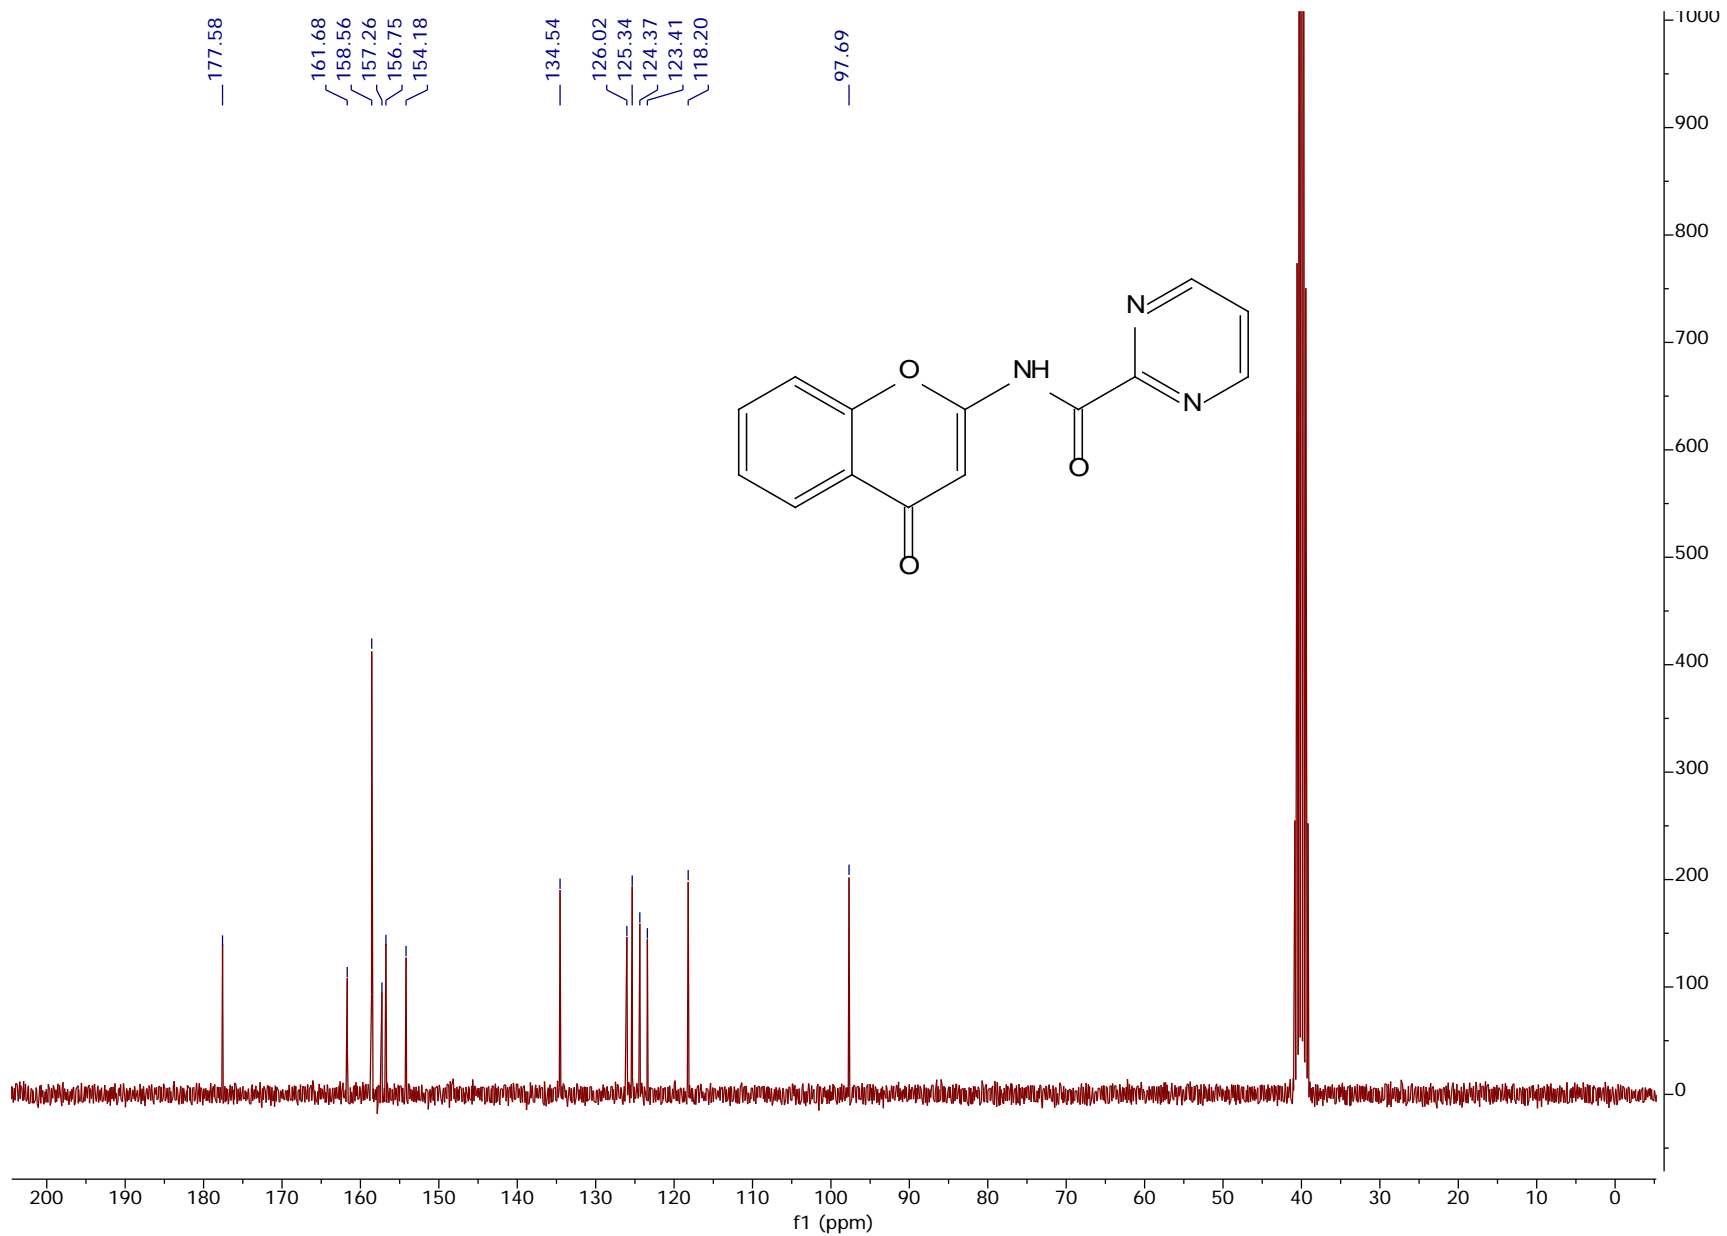

***N*-(4-Oxo-4*H*-chromen-2-yl)butyramide (6w)**

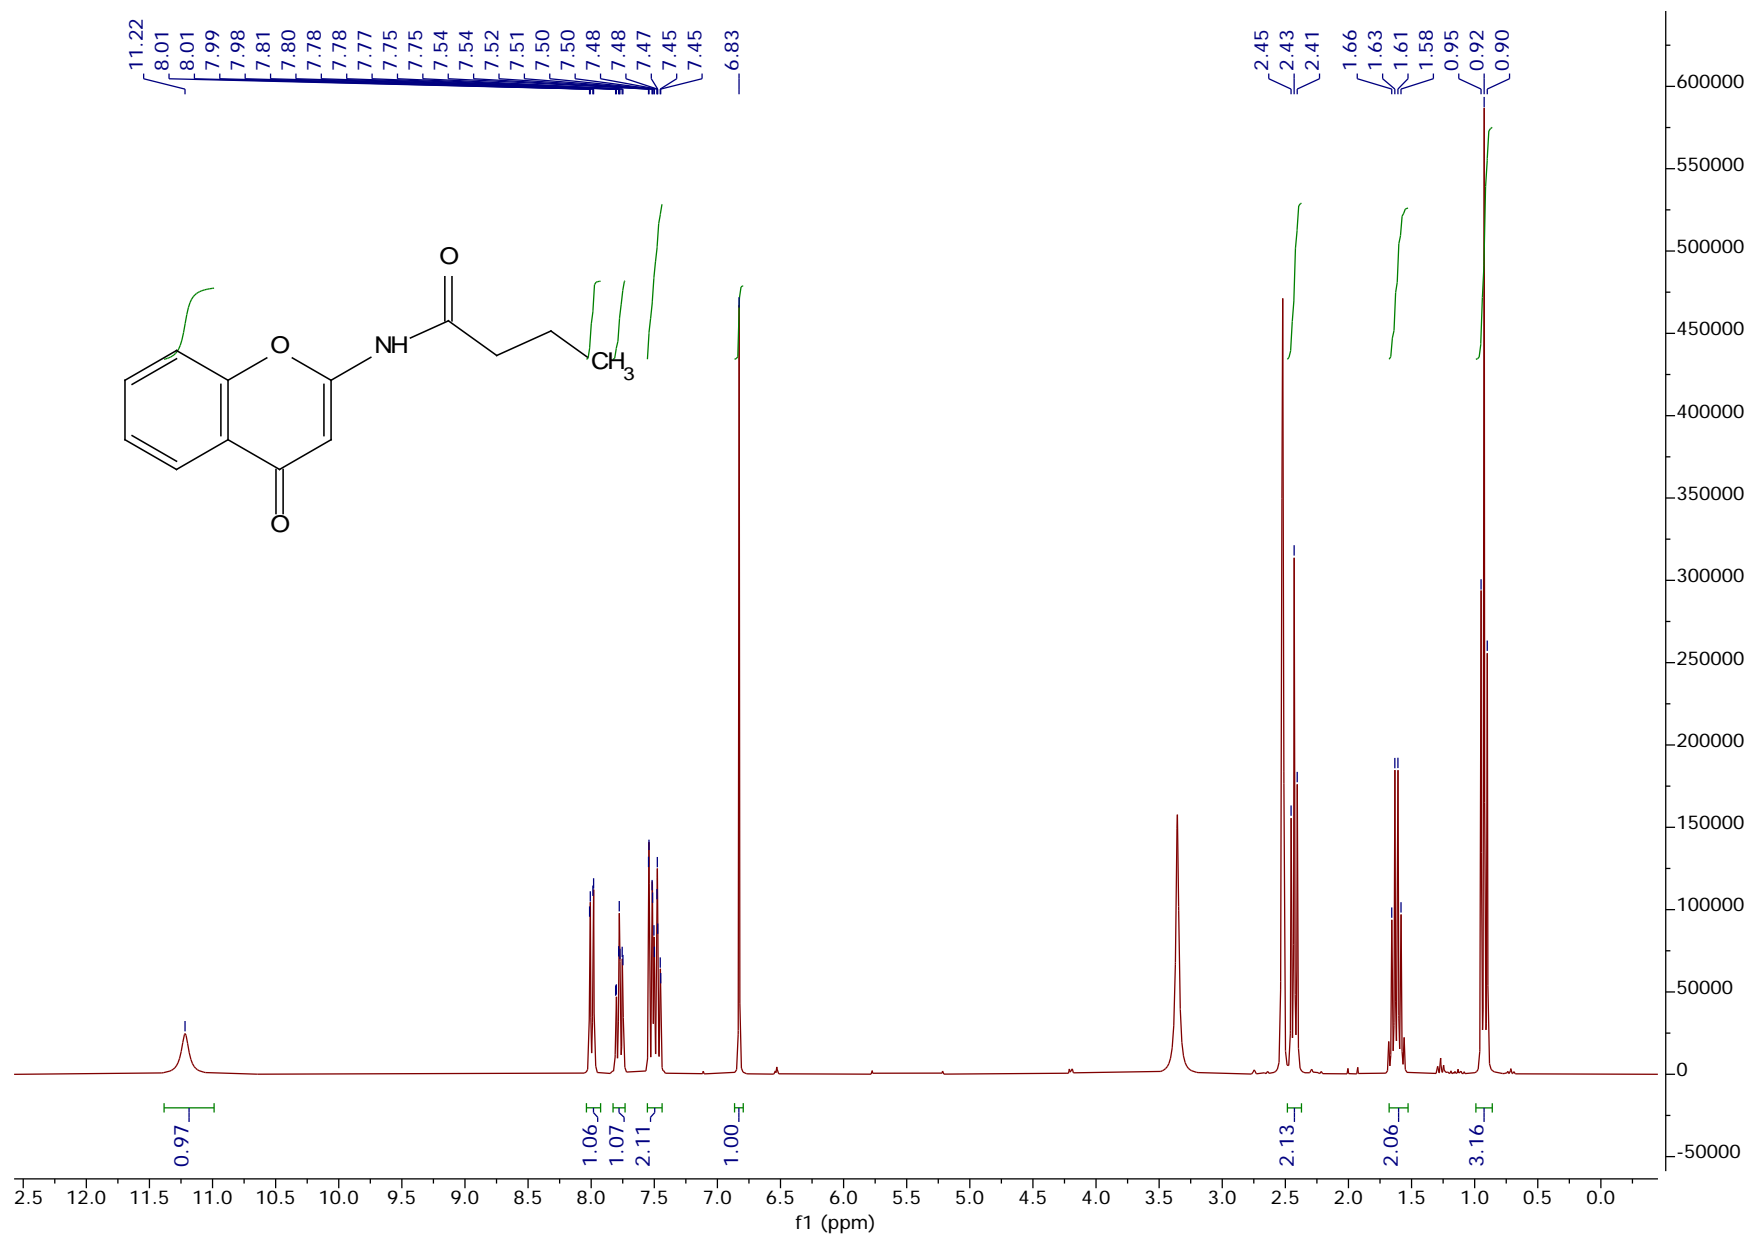

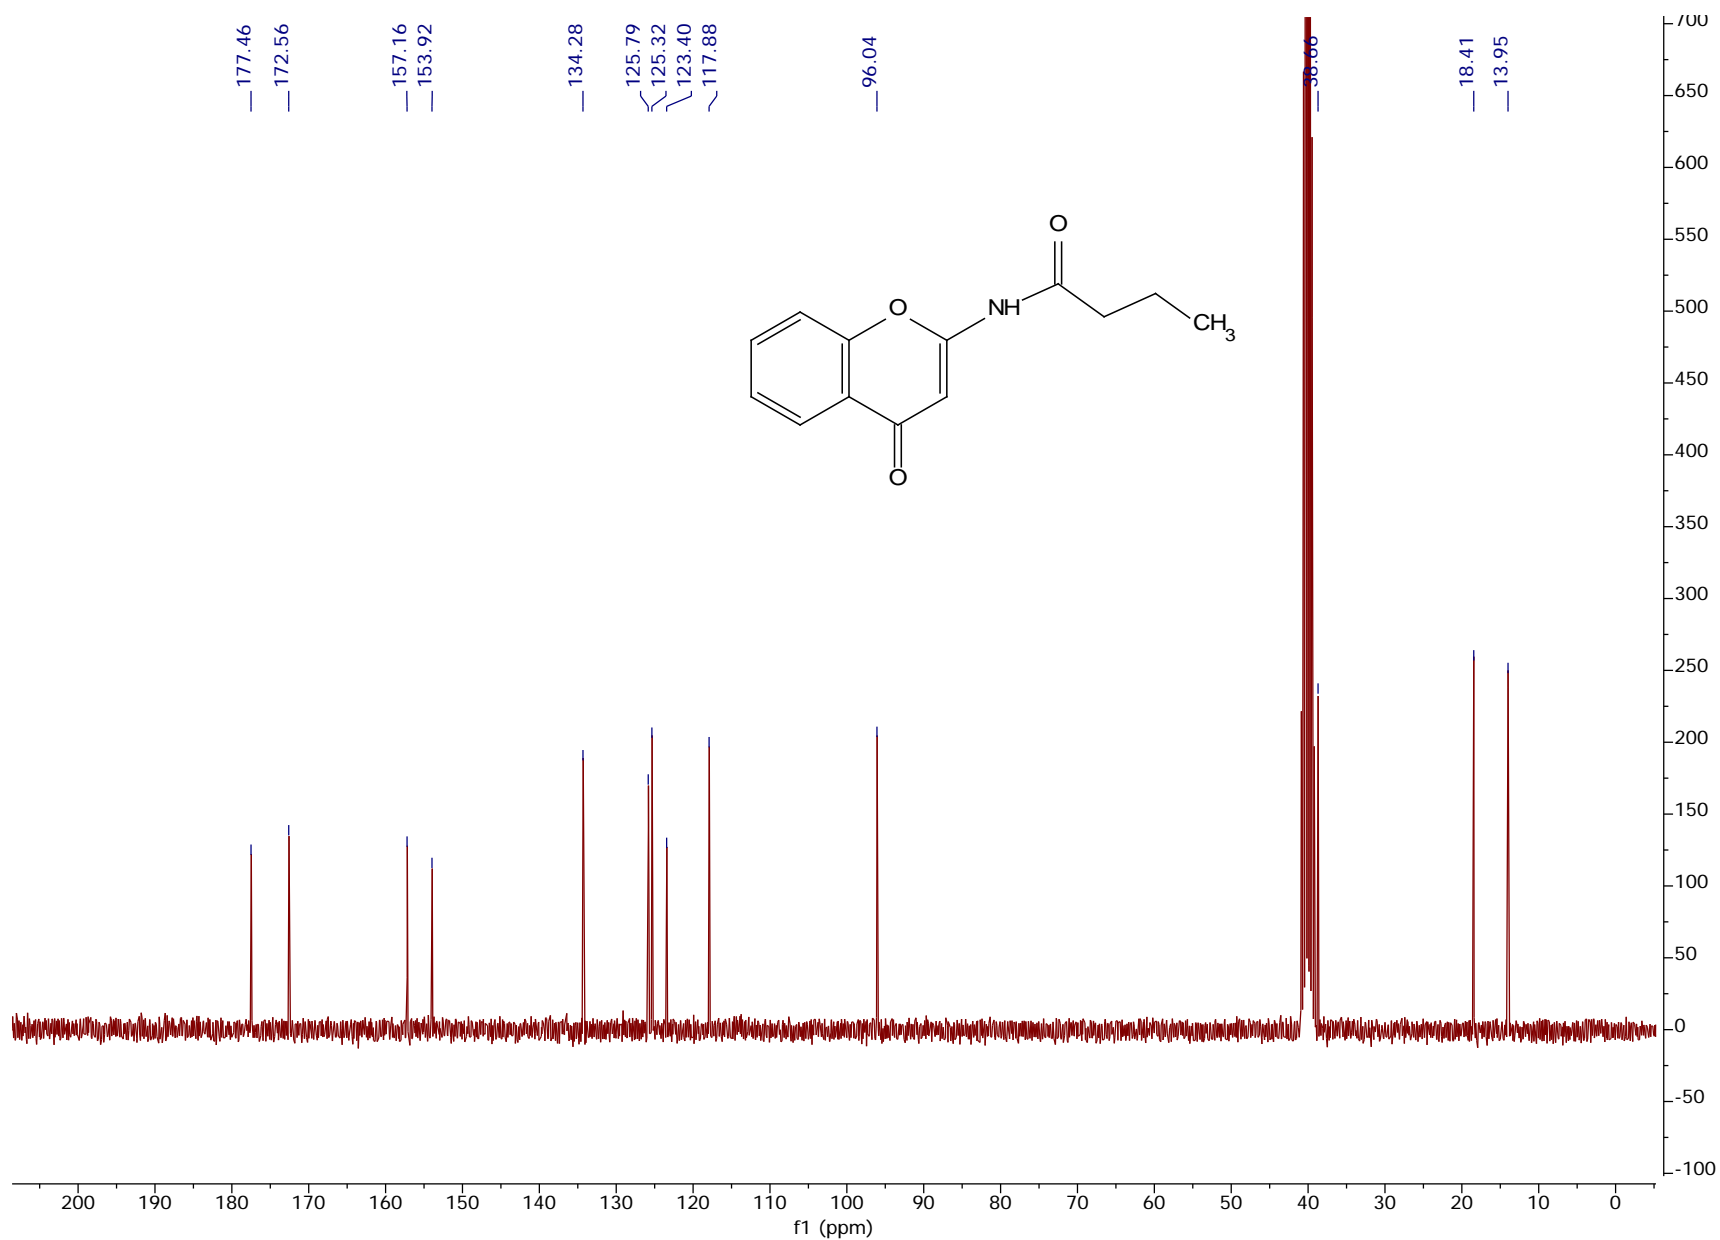

***N*-(4-Oxo-4*H*-chromen-2-yl)cyclohexanecarboxamide (6x)**

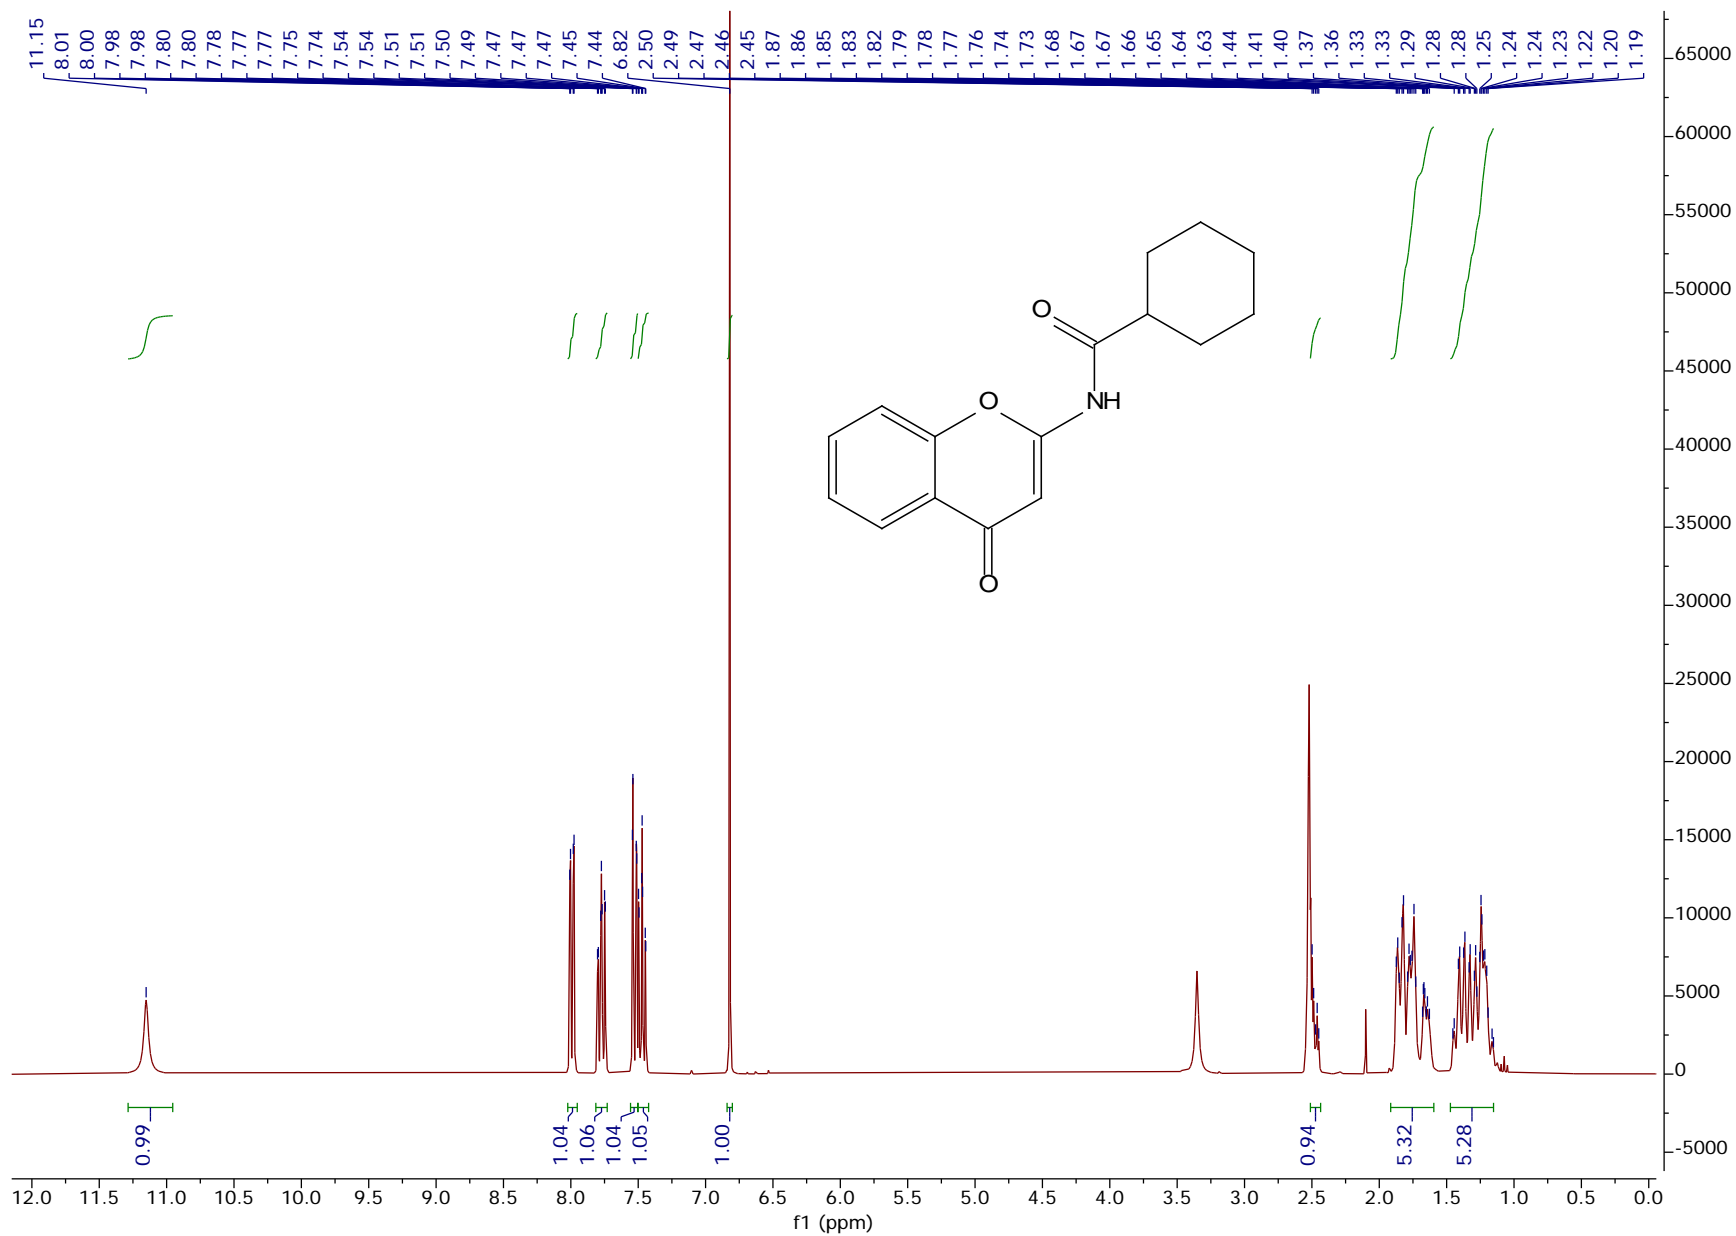

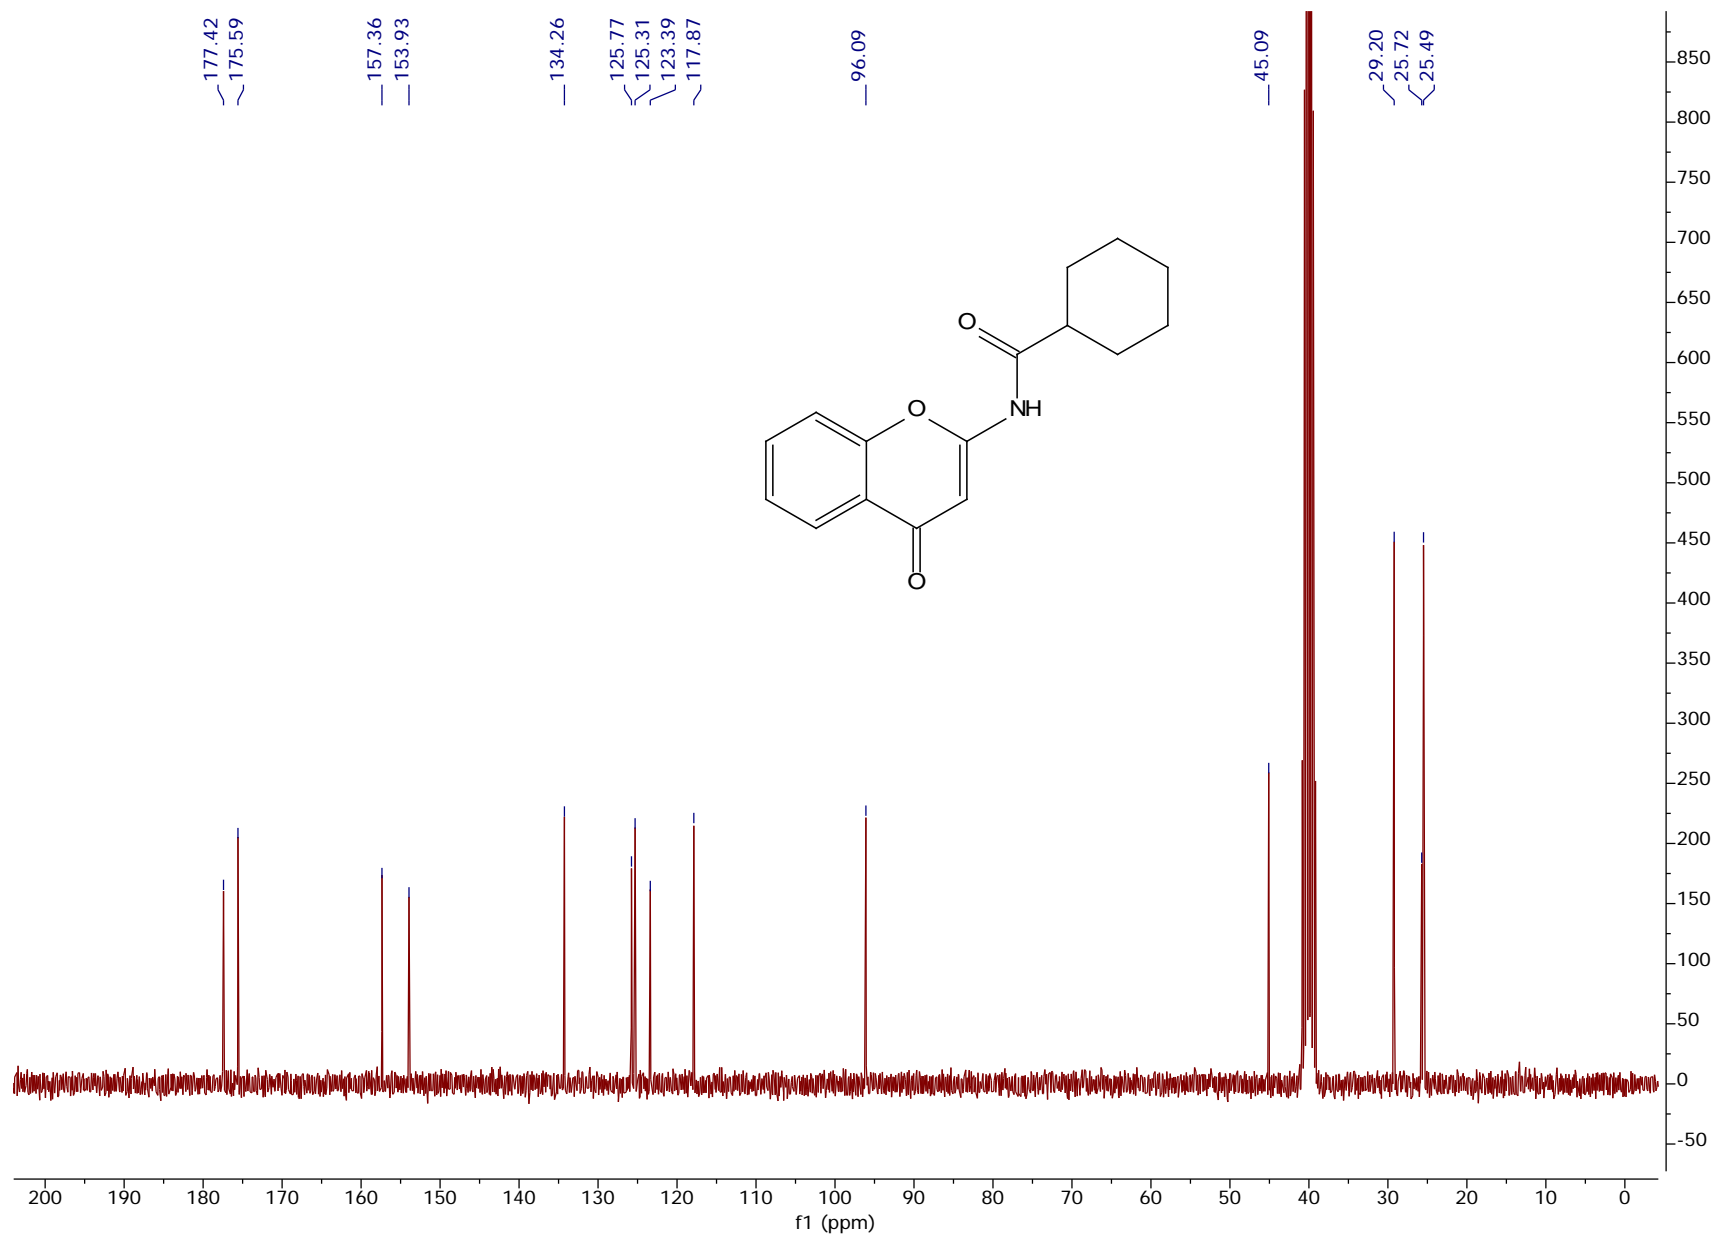

(3R,5R,7R)-N-(4-Oxo-4H-chromen-2-yl)adamantane-1-carboxamide (6y)

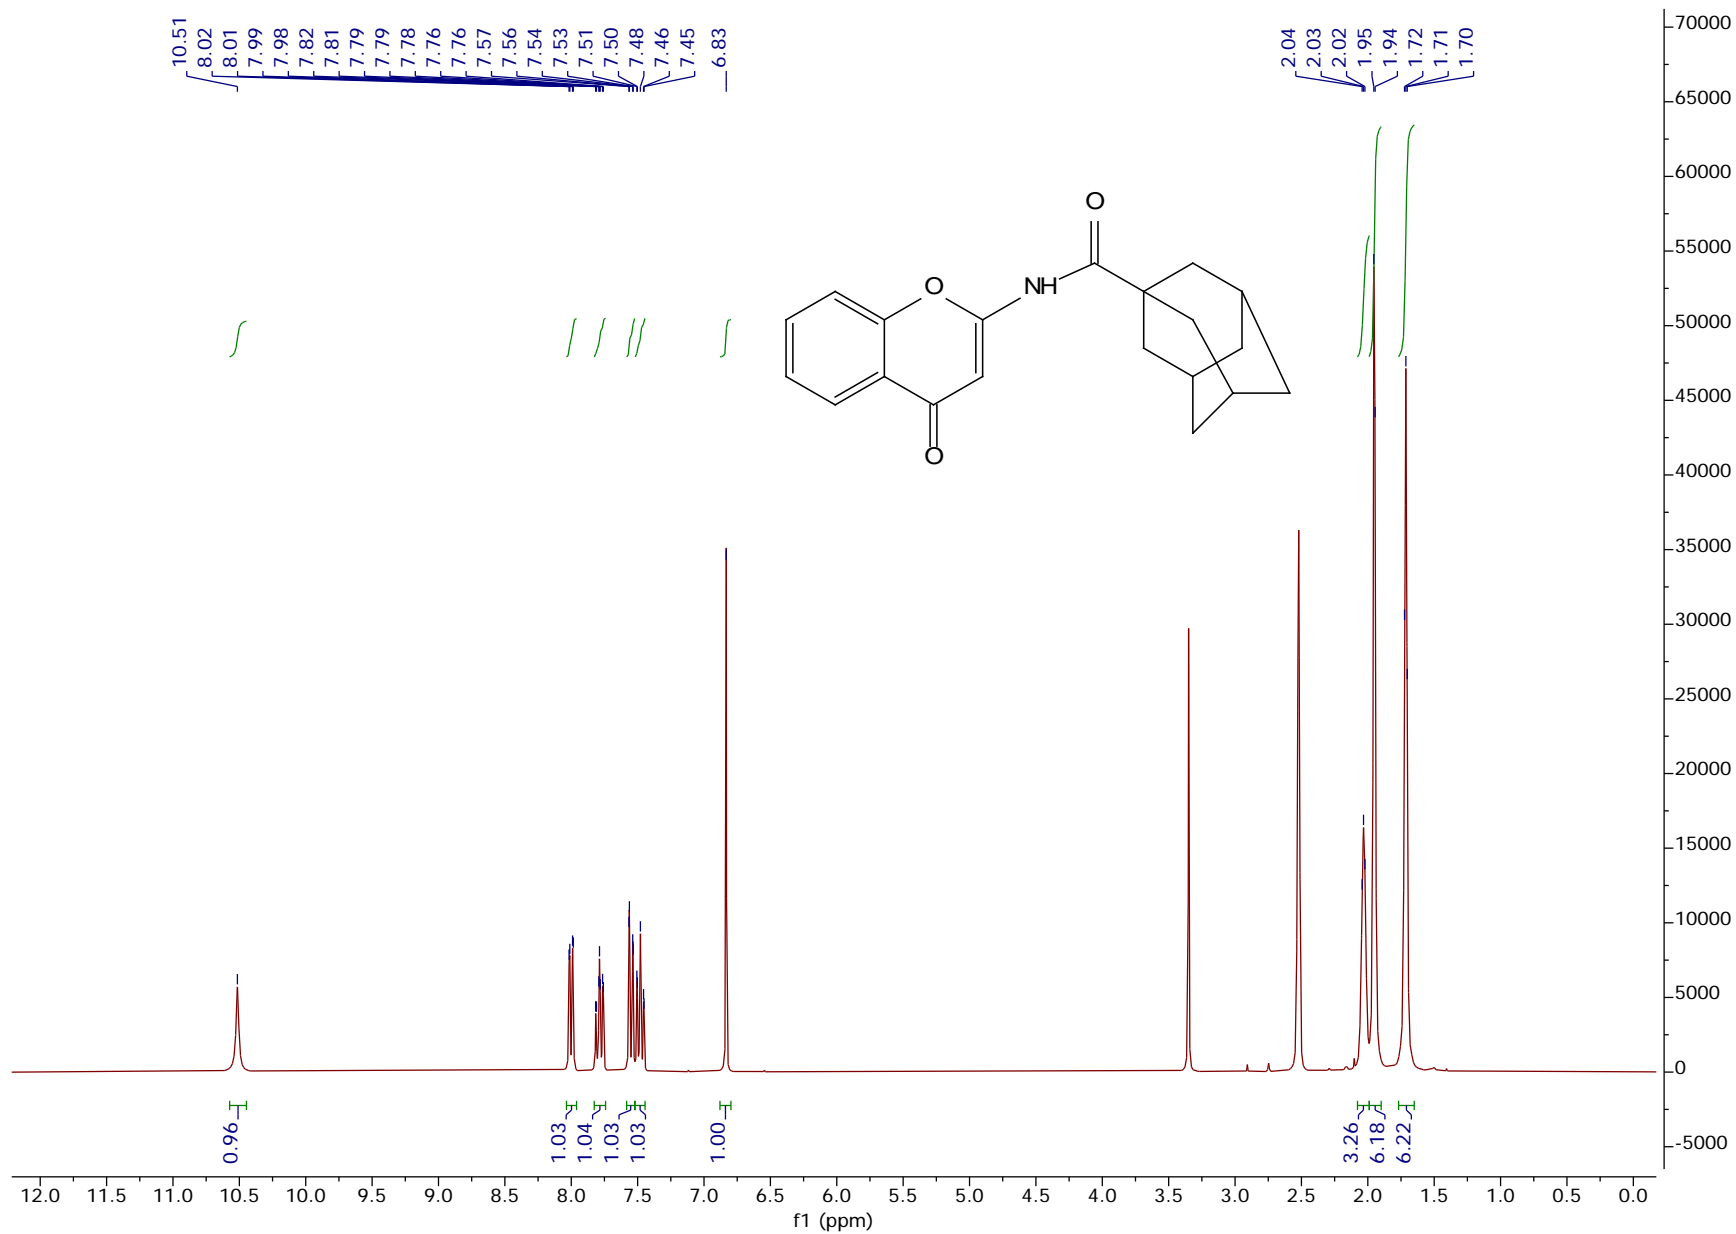

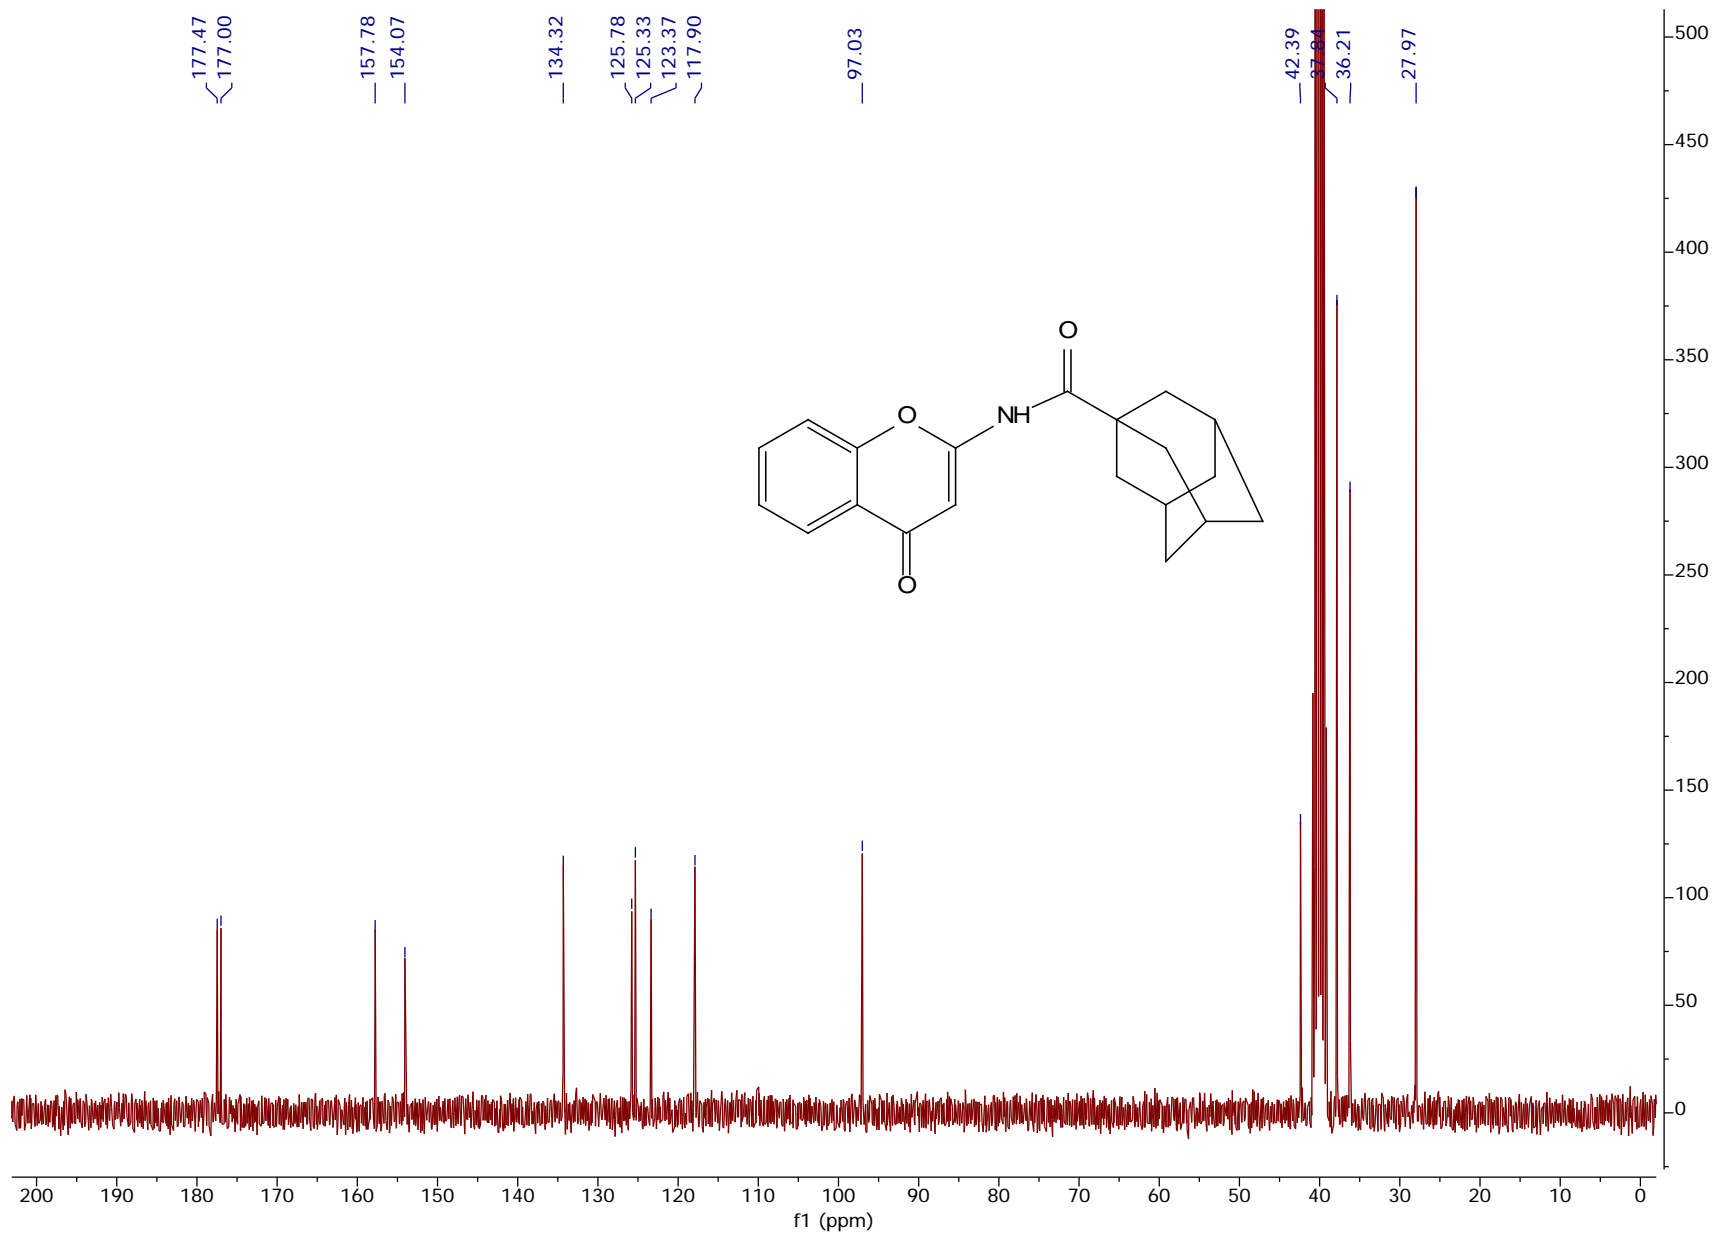



4-Oxo-N-(4-oxo-4H-chromen-2-yl)-4H-chromene-2-carboxamide (6z)

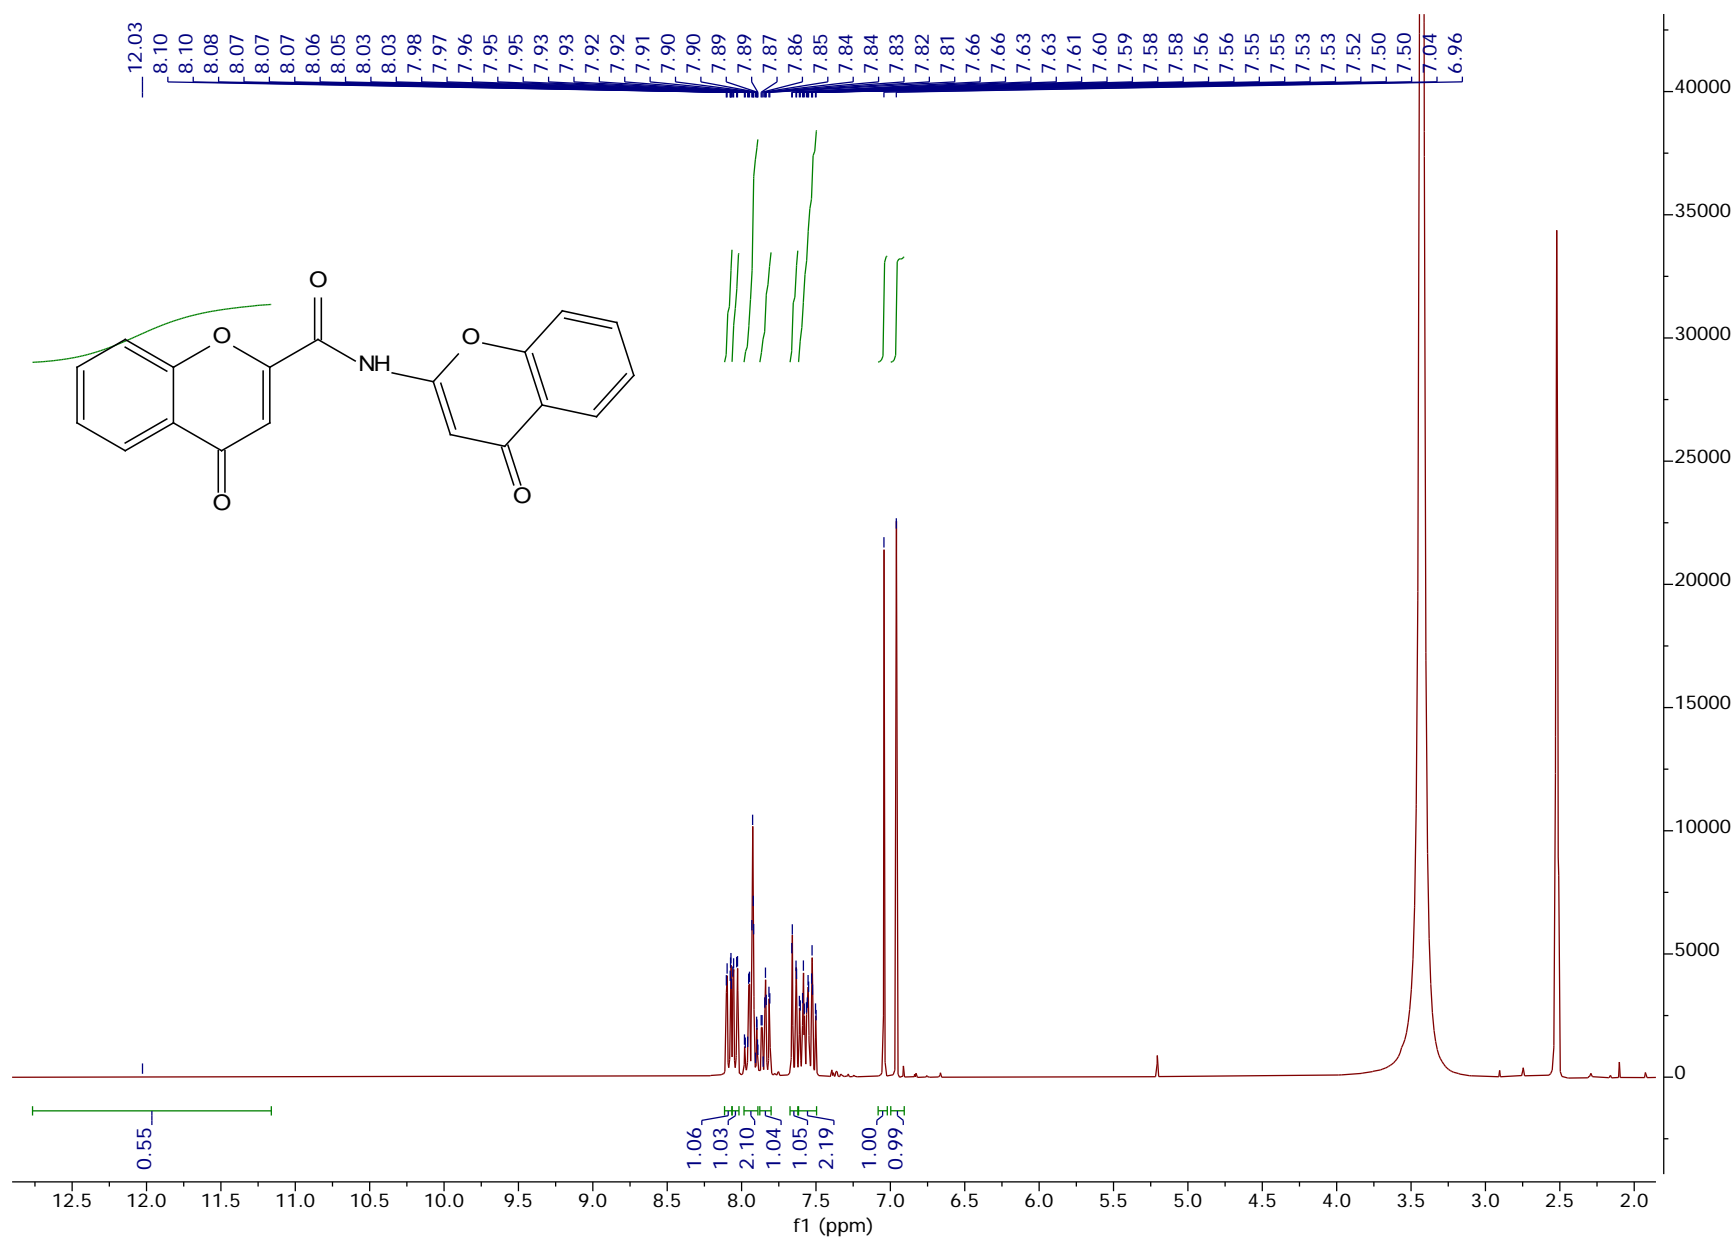

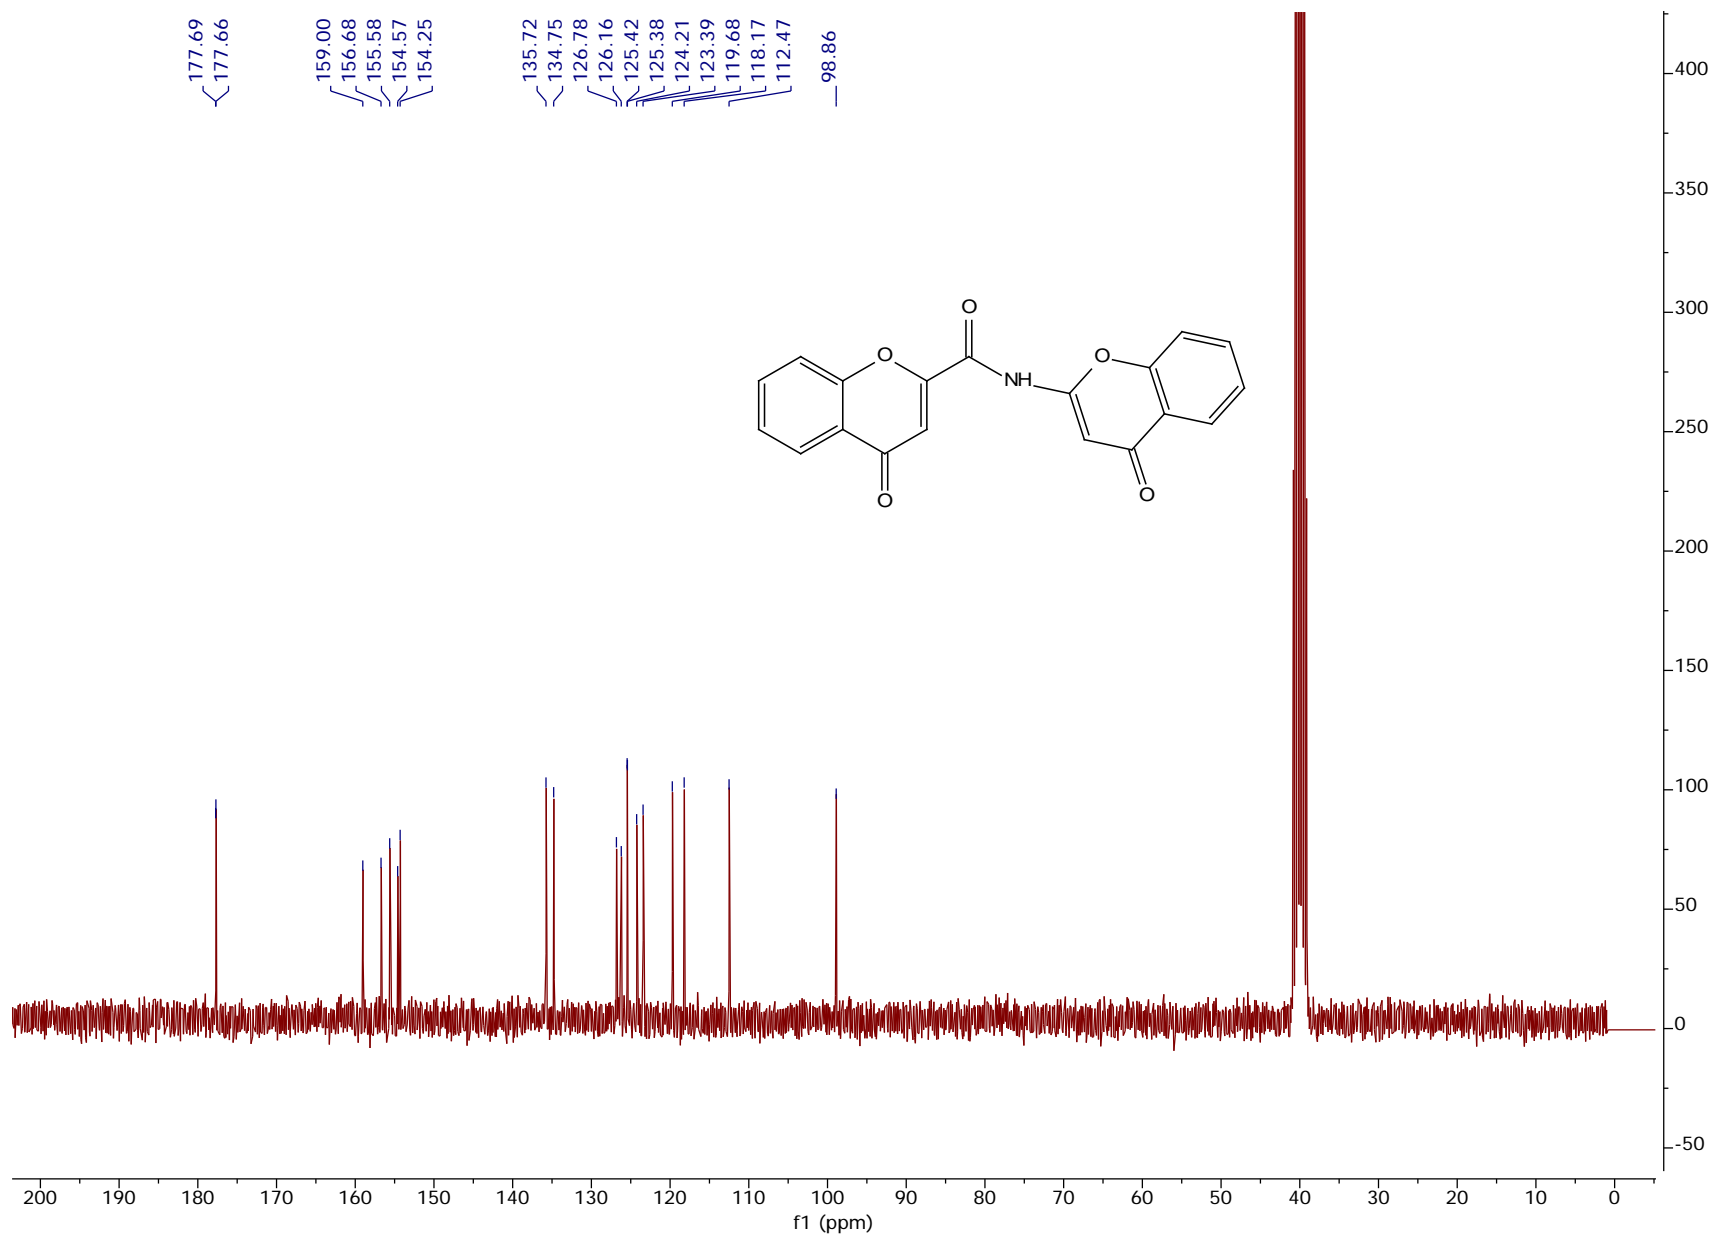

**3-(4-Bromophenyl)-2-isocyanato-4H-chromen-4-one (7)**

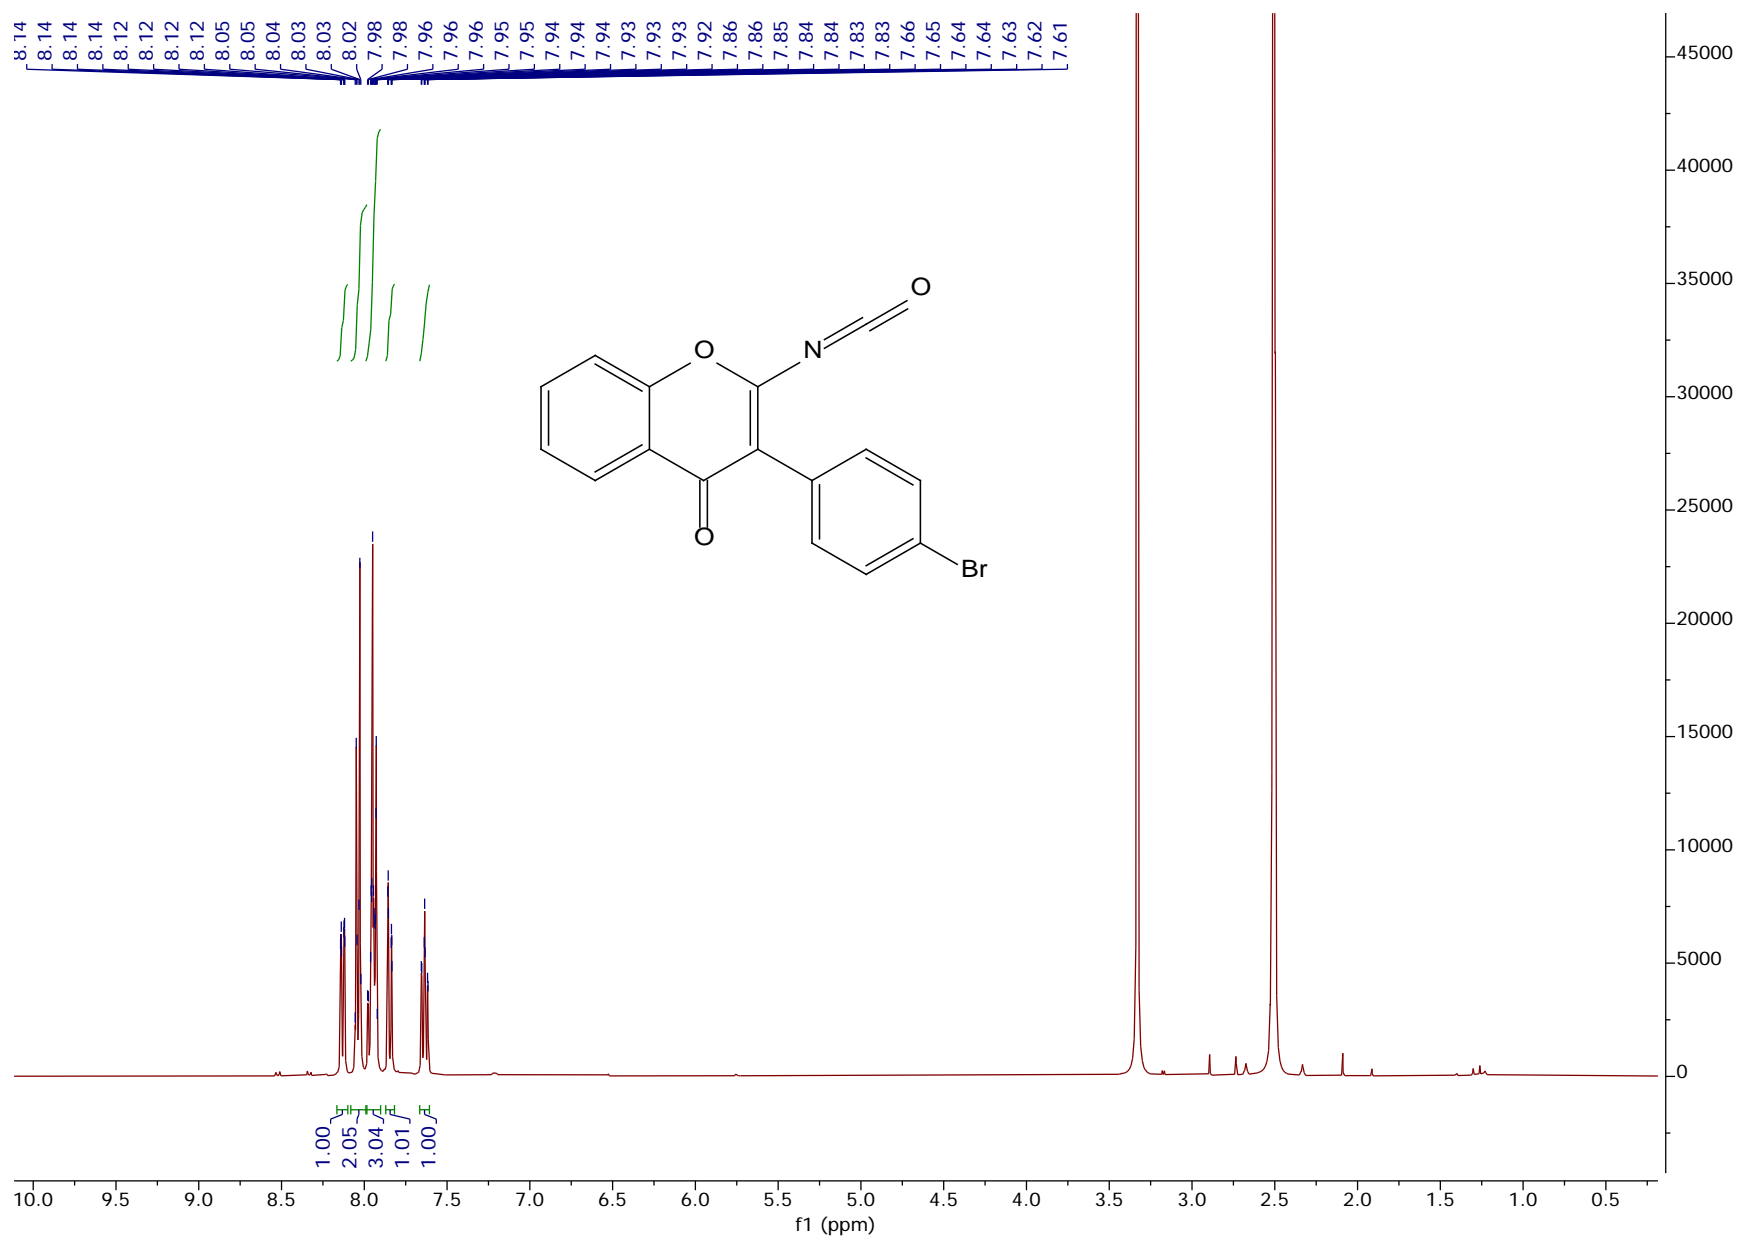

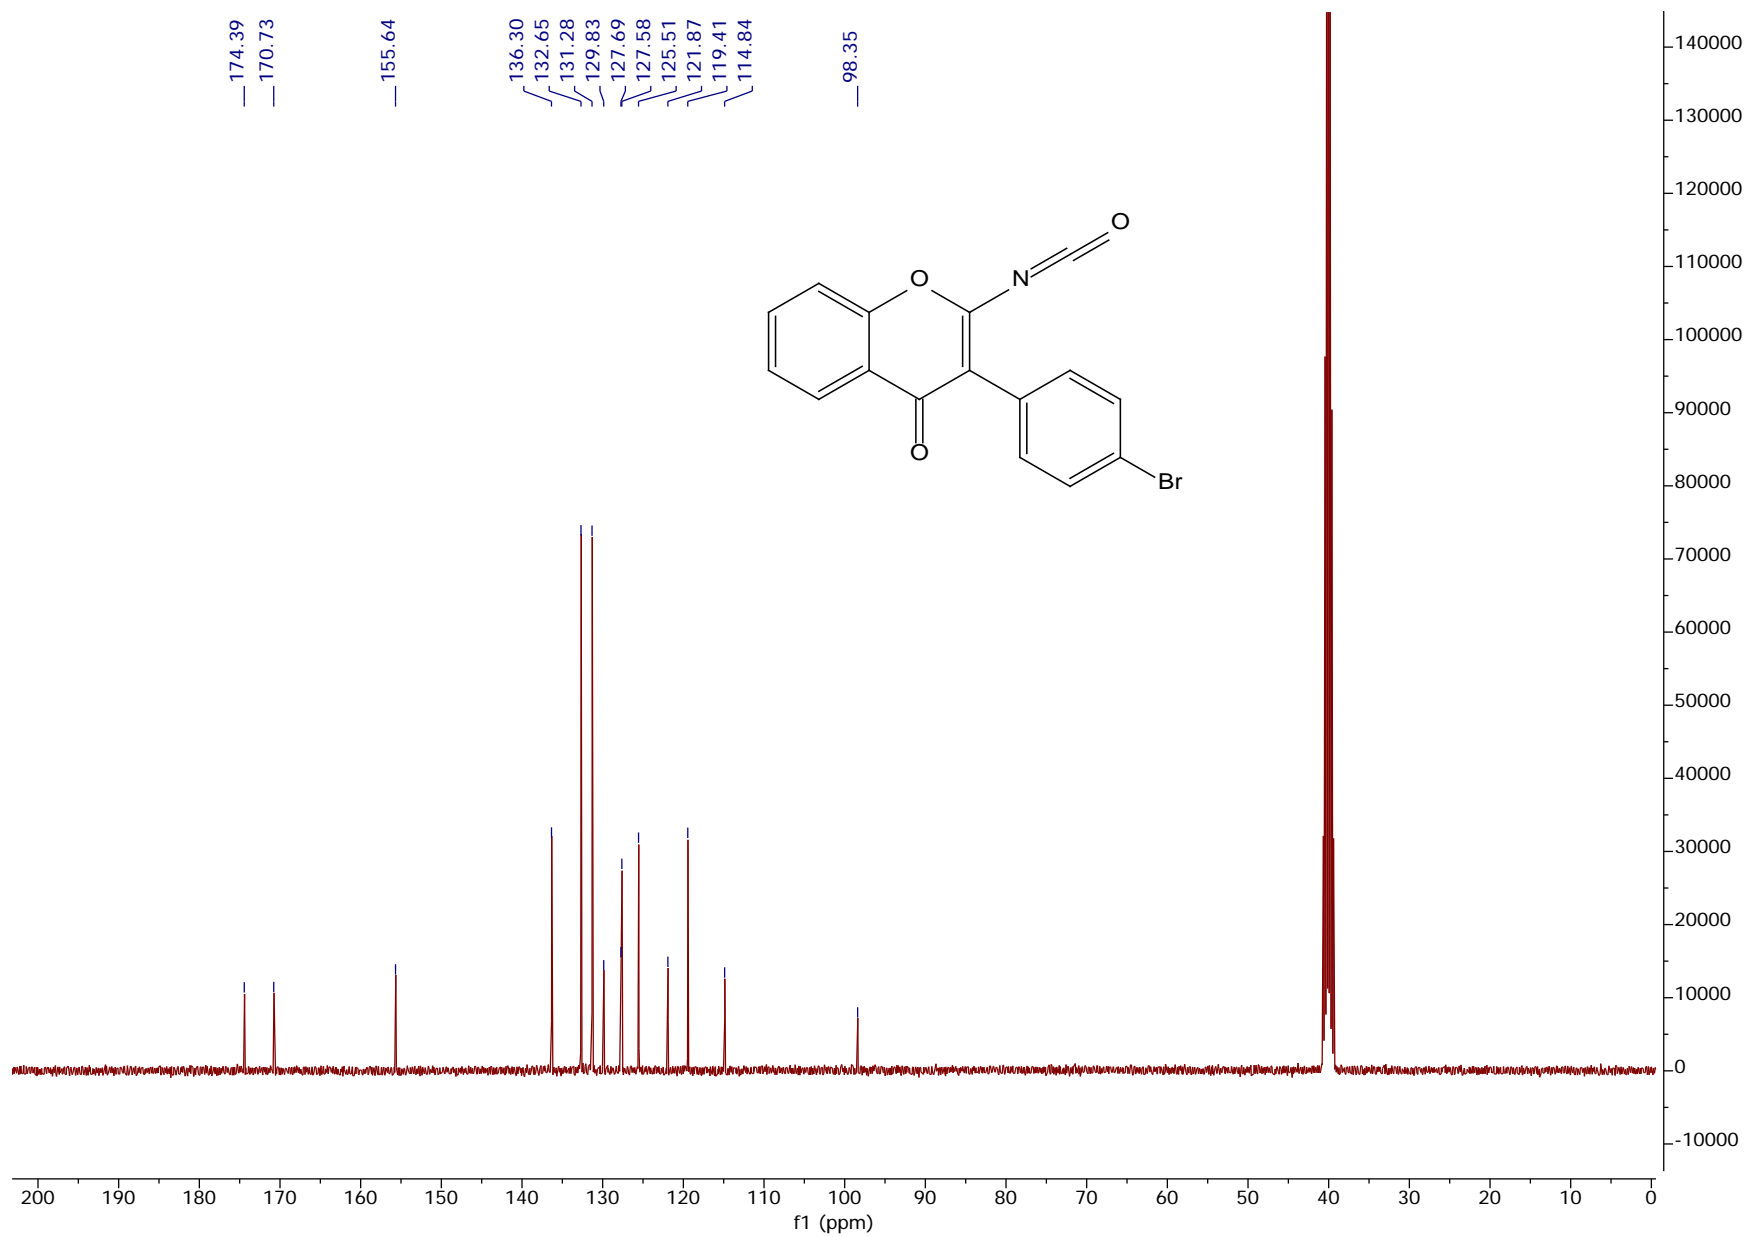

Supplement: s1 [file s1]
